# Supplementary material
Source: publisher site journal article supplement (https://www.spandidos-publications.com/2109/downloadSupplementary)
Supplement: Supplementary file 1 [file downloadSupplementary]

## Sheet: CeRNA_Score
Table SVI. The total interrelations related to lncRNA-miRNA-mRNA ceRNA networks.
mRNA	lncRNA	CeRNA_Score	Pvalue	Shared_miRNA_Nunber	Shared_miRNA
LYST	ENST00000261530	0.566327	7.54385e-95	62	NC_000001.11_2008;hsa-miR-934;hsa-miR-33b-3p;NC_000006.12_14671;hsa-miR-25-5p;hsa-miR-372-5p;NC_000013.11_28441;hsa-miR-30c-1-3p;NC_000008.11_19445;hsa-miR-498;NC_000010.11_23303;NC_000005.10_12588;hsa-miR-92a-1-5p;hsa-miR-629-3p;NC_000007.14_17821;hsa-miR-27b-5p;hsa-miR-1298-5p;NC_000021.9_35751;NC_000010.11_23646;NC_000012.12_25887;NC_000011.10_25384;hsa-miR-302c-5p;hsa-miR-17-5p;hsa-miR-34c-5p…
LYST	ENST00000281092	0.595	9.24254e-92	60	NC_000001.11_2008;hsa-miR-934;hsa-miR-33b-3p;NC_000006.12_14671;hsa-miR-372-5p;hsa-miR-30c-1-3p;NC_000008.11_19445;hsa-miR-498;NC_000010.11_23303;NC_000005.10_12588;hsa-miR-92a-1-5p;hsa-miR-629-3p;hsa-miR-1298-5p;hsa-miR-27b-5p;NC_000021.9_35751;NC_000012.12_25887;NC_000011.10_25384;hsa-miR-302c-5p;NC_000012.12_26286;NC_000006.12_15769;hsa-miR-17-5p;hsa-miR-34c-5p;NC_000006.12_15809;NC_000013.11_…
TTN	ENST00000261530	0.821429	1.36697e-91	60	NC_000001.11_2008;hsa-miR-934;hsa-miR-33b-3p;NC_000006.12_14671;hsa-miR-25-5p;hsa-miR-372-5p;NC_000013.11_28441;hsa-miR-30c-1-3p;NC_000023.11_36905;NC_000010.11_23303;hsa-miR-371b-3p;hsa-miR-92a-1-5p;hsa-miR-629-3p;NC_000003.12_7276;NC_000007.14_17821;hsa-miR-27b-5p;NC_000021.9_35751;NC_000012.12_25887;hsa-miR-18a-3p;NC_000011.10_25384;NC_000018.10_33742;NC_000004.12_9892;NC_000005.10_11919>NC_00…
HIPK2	ENST00000261530	0.653061	1.16247e-90	62	hsa-miR-934;hsa-miR-33b-3p;NC_000006.12_14671;hsa-miR-372-5p;NC_000013.11_28441;hsa-miR-30c-1-3p;NC_000008.11_19445;NC_000023.11_36905;NC_000010.11_23303;hsa-miR-371b-3p;hsa-miR-498;hsa-miR-92a-1-5p;NC_000005.10_12588;NC_000003.12_7276;NC_000007.14_17821;hsa-miR-1298-5p;NC_000010.11_23646;NC_000021.9_35751;NC_000012.12_25887;hsa-miR-18a-3p;NC_000011.10_25384;NC_000004.12_9892;NC_000005.10_11919>N…
DENND4A	ENST00000261530	0.520408	1.20501e-90	56	NC_000001.11_2008;hsa-miR-934;NC_000006.12_14671;NC_000013.11_28441;hsa-miR-30c-1-3p;NC_000008.11_19445;NC_000023.11_36905;NC_000010.11_23303;hsa-miR-371b-3p;NC_000005.10_12588;hsa-miR-629-3p;NC_000007.14_17821;hsa-miR-27b-5p;hsa-miR-1298-5p;NC_000021.9_35751;NC_000010.11_23646;NC_000012.12_25887;NC_000011.10_25384;NC_000004.12_9892;NC_000005.10_11919>NC_000005.10_11920;hsa-miR-17-5p;hsa-miR-34c-…
TTN	ENST00000281092	0.815	2.2459e-88	58	NC_000001.11_2008;hsa-miR-934;hsa-miR-33b-3p;NC_000006.12_14671;hsa-miR-372-5p;hsa-miR-30c-1-3p;NC_000010.11_23303;hsa-miR-371b-3p;hsa-miR-92a-1-5p;hsa-miR-629-3p;hsa-miR-27b-5p;NC_000021.9_35751;NC_000012.12_25887;hsa-miR-18a-3p;NC_000011.10_25384;NC_000004.12_9892;NC_000005.10_11919>NC_000005.10_11920;hsa-miR-302c-5p;NC_000012.12_26286;NC_000006.12_15769;hsa-miR-17-5p;hsa-miR-34c-5p;NC_000022.1…
CHD9	ENST00000281092	0.52	1.09567e-87	52	NC_000001.11_2008;hsa-miR-934;NC_000006.12_14671;hsa-miR-30c-1-3p;hsa-miR-498;NC_000010.11_23303;NC_000005.10_12588;hsa-miR-92a-1-5p;hsa-miR-629-3p;hsa-miR-27b-5p;NC_000021.9_35751;NC_000012.12_25887;hsa-miR-18a-3p;NC_000011.10_25384;NC_000005.10_11919>NC_000005.10_11920;NC_000004.12_9892;hsa-miR-302c-5p;NC_000012.12_26286;NC_000006.12_15769;hsa-miR-17-5p;NC_000013.11_27627;NC_000022.11_36372;hsa…
VTI1A	ENST00000261530	0.545918	1.52088e-87	61	hsa-miR-934;hsa-miR-33b-3p;NC_000006.12_14671;hsa-miR-25-5p;hsa-miR-372-5p;NC_000013.11_28441;hsa-miR-30c-1-3p;NC_000008.11_19445;NC_000023.11_36905;NC_000010.11_23303;hsa-miR-371b-3p;hsa-miR-498;hsa-miR-92a-1-5p;NC_000005.10_12588;hsa-miR-629-3p;NC_000007.14_17821;NC_000010.11_23646;NC_000021.9_35751;NC_000012.12_25887;hsa-miR-18a-3p;NC_000011.10_25384;NC_000004.12_9892;NC_000005.10_11919>NC_000…
DENND4A	ENST00000281092	0.475	9.60512e-87	54	NC_000001.11_2008;hsa-miR-934;NC_000006.12_14671;hsa-miR-30c-1-3p;NC_000008.11_19445;NC_000010.11_23303;hsa-miR-371b-3p;NC_000005.10_12588;hsa-miR-629-3p;hsa-miR-1298-5p;hsa-miR-27b-5p;NC_000021.9_35751;NC_000012.12_25887;NC_000011.10_25384;NC_000004.12_9892;NC_000005.10_11919>NC_000005.10_11920;NC_000012.12_26286;NC_000006.12_15769;hsa-miR-17-5p;hsa-miR-34c-5p;NC_000013.11_27627;NC_000005.10_141…
VCPIP1	ENST00000281092	0.5	1.26427e-86	51	hsa-miR-934;hsa-miR-33b-3p;hsa-miR-372-5p;hsa-miR-30c-1-3p;NC_000008.11_19445;hsa-miR-498;NC_000005.10_12588;hsa-miR-675-5p;hsa-miR-629-3p;NC_000012.12_25887;hsa-miR-18a-3p;NC_000011.10_25384;NC_000005.10_11919>NC_000005.10_11920;NC_000004.12_9892;hsa-miR-302c-5p;NC_000006.12_15769;hsa-miR-17-5p;hsa-miR-34c-5p;NC_000013.11_27627;NC_000022.11_36372;hsa-miR-1257;hsa-miR-26a-1-3p;hsa-miR-7-5p;NC_000…
HIPK2	ENST00000281092	0.69	3.59614e-85	59	hsa-miR-934;hsa-miR-33b-3p;NC_000006.12_14671;hsa-miR-372-5p;hsa-miR-30c-1-3p;NC_000008.11_19445;hsa-miR-498;NC_000010.11_23303;hsa-miR-371b-3p;hsa-miR-675-5p;hsa-miR-92a-1-5p;NC_000005.10_12588;hsa-miR-1298-5p;NC_000021.9_35751;NC_000012.12_25887;hsa-miR-18a-3p;NC_000011.10_25384;NC_000004.12_9892;NC_000005.10_11919>NC_000005.10_11920;hsa-miR-302c-5p;NC_000012.12_26286;NC_000006.12_15769;hsa-miR…
VTI1A	ENST00000281092	0.635	9.79776e-85	59	hsa-miR-934;hsa-miR-33b-3p;NC_000006.12_14671;hsa-miR-372-5p;hsa-miR-30c-1-3p;NC_000008.11_19445;hsa-miR-498;NC_000010.11_23303;hsa-miR-371b-3p;hsa-miR-675-5p;hsa-miR-92a-1-5p;NC_000005.10_12588;hsa-miR-629-3p;NC_000021.9_35751;NC_000012.12_25887;hsa-miR-18a-3p;NC_000011.10_25384;NC_000004.12_9892;NC_000005.10_11919>NC_000005.10_11920;hsa-miR-302c-5p;NC_000012.12_26286;NC_000006.12_15769;hsa-miR-…
LCOR	ENST00000281092	0.565	4.41942e-84	52	hsa-miR-934;hsa-miR-372-5p;hsa-miR-30c-1-3p;NC_000008.11_19445;NC_000010.11_23303;NC_000005.10_12588;hsa-miR-629-3p;hsa-miR-1298-5p;hsa-miR-27b-5p;NC_000021.9_35751;NC_000012.12_25887;NC_000011.10_25384;NC_000004.12_9892;hsa-miR-302c-5p;NC_000012.12_26286;NC_000006.12_15769;hsa-miR-17-5p;hsa-miR-34c-5p;NC_000013.11_27627;NC_000022.11_36372;hsa-miR-1257;hsa-miR-26a-1-3p;hsa-miR-7-5p;NC_000001.11_3…
ANK2	NR_033268	0.834862	8.16028e-84	58	NC_000009.12_21574;hsa-miR-372-5p;hsa-miR-3155a;NC_000013.11_28441;hsa-miR-30c-1-3p;NC_000009.12_20733;NC_000023.11_36905;NC_000010.11_23303;hsa-miR-371b-3p;hsa-miR-92a-1-5p;hsa-miR-518b;hsa-miR-7974;hsa-miR-518e-5p>hsa-miR-519a-5p>hsa-miR-519b-5p>hsa-miR-519c-5p>hsa-miR-522-5p>hsa-miR-523-5p;NC_000003.12_7276;NC_000007.14_17821;hsa-miR-510-5p;hsa-miR-1298-5p;NC_000021.9_35751;NC_000003.12_8583;N…
SLC38A1	ENST00000261530	0.469388	1.93704e-83	54	hsa-miR-934;hsa-miR-33b-3p;NC_000006.12_14671;hsa-miR-25-5p;hsa-miR-372-5p;NC_000013.11_28441;hsa-miR-30c-1-3p;NC_000008.11_19445;NC_000023.11_36905;hsa-miR-371b-3p;hsa-miR-92a-1-5p;NC_000003.12_7276;hsa-miR-629-3p;hsa-miR-27b-5p;NC_000012.12_25887;NC_000011.10_25384;NC_000018.10_33742;NC_000004.12_9892;hsa-miR-302c-5p;hsa-miR-17-5p;hsa-miR-34c-5p;NC_000013.11_27627;hsa-miR-1257;hsa-miR-26a-1-3p;…
ADAM20	NR_033268	0.733945	4.82116e-83	55	hsa-miR-934;NC_000009.12_21574;hsa-miR-371a-5p;hsa-miR-372-5p;NC_000013.11_28441;NC_000009.12_20733;hsa-miR-30c-1-3p;hsa-miR-3155a;NC_000023.11_36905;NC_000010.11_23303;hsa-miR-371b-3p;hsa-miR-92a-1-5p;hsa-miR-7974;hsa-miR-518e-5p>hsa-miR-519a-5p>hsa-miR-519b-5p>hsa-miR-519c-5p>hsa-miR-522-5p>hsa-miR-523-5p;NC_000003.12_7276;NC_000007.14_17821;hsa-miR-510-5p;NC_000010.11_23646;NC_000021.9_35751;N…
PIK3CA	ENST00000263967	0.80137	5.31592e-83	52	hsa-miR-934;hsa-miR-33b-3p;hsa-miR-372-5p;NC_000013.11_28441;hsa-miR-30c-1-3p;hsa-miR-371b-3p;hsa-miR-92a-1-5p;hsa-miR-7974;hsa-miR-629-3p;hsa-miR-3662;NC_000007.14_17821;NC_000010.11_23646;NC_000012.12_25887;NC_000004.12_10500;NC_000011.10_25384;NC_000018.10_33742;NC_000005.10_11919>NC_000005.10_11920;NC_000009.12_21255;hsa-miR-302c-5p;NC_000006.12_15769;hsa-miR-17-5p;NC_000013.11_27627;NC_00002…
TTN	ENST00000263967	0.917808	6.16338e-83	53	hsa-miR-934;hsa-miR-33b-3p;hsa-miR-372-5p;NC_000013.11_28441;hsa-miR-30c-1-3p;hsa-miR-371b-3p;hsa-miR-92a-1-5p;hsa-miR-7974;hsa-miR-629-3p;hsa-miR-3662;NC_000007.14_17821;NC_000012.12_25887;NC_000004.12_10500;NC_000011.10_25384;NC_000018.10_33742;NC_000004.12_9892;NC_000005.10_11919>NC_000005.10_11920;NC_000009.12_21255;hsa-miR-302c-5p;NC_000006.12_15769;hsa-miR-17-5p;NC_000022.11_36437;hsa-miR-1…
SLC39A10	ENST00000261530	0.464286	9.34254e-83	54	NC_000001.11_2008;hsa-miR-934;hsa-miR-33b-3p;NC_000006.12_14671;hsa-miR-25-5p;hsa-miR-372-5p;NC_000013.11_28441;hsa-miR-30c-1-3p;NC_000008.11_19445;NC_000023.11_36905;NC_000010.11_23303;hsa-miR-371b-3p;hsa-miR-498;hsa-miR-92a-1-5p;NC_000005.10_12588;NC_000007.14_17821;hsa-miR-27b-5p;hsa-miR-1298-5p;NC_000012.12_25887;NC_000011.10_25384;NC_000005.10_11919>NC_000005.10_11920;hsa-miR-302c-5p;hsa-miR…
HIPK2	NR_033268	0.816514	2.11918e-82	57	hsa-miR-934;hsa-miR-371a-5p;hsa-miR-372-5p;hsa-miR-3155a;NC_000013.11_28441;hsa-miR-30c-1-3p;NC_000023.11_36905;NC_000010.11_23303;hsa-miR-371b-3p;hsa-miR-92a-1-5p;hsa-miR-518b;hsa-miR-7974;hsa-miR-518e-5p>hsa-miR-519a-5p>hsa-miR-519b-5p>hsa-miR-519c-5p>hsa-miR-522-5p>hsa-miR-523-5p;NC_000003.12_7276;NC_000007.14_17821;hsa-miR-302a-5p;hsa-miR-1298-5p;NC_000021.9_35751;NC_000003.12_8583;hsa-miR-18…
SLC39A10	ENST00000281092	0.49	7.32567e-82	53	NC_000001.11_2008;hsa-miR-934;hsa-miR-33b-3p;NC_000006.12_14671;hsa-miR-372-5p;hsa-miR-30c-1-3p;NC_000008.11_19445;hsa-miR-498;NC_000010.11_23303;hsa-miR-371b-3p;hsa-miR-92a-1-5p;NC_000005.10_12588;hsa-miR-1298-5p;hsa-miR-27b-5p;NC_000012.12_25887;NC_000011.10_25384;NC_000005.10_11919>NC_000005.10_11920;hsa-miR-302c-5p;NC_000012.12_26286;NC_000006.12_15769;hsa-miR-17-5p;hsa-miR-34c-5p;NC_000006.1…
ANK2	ENST00000261530	0.607143	1.37691e-81	59	hsa-miR-33b-3p;NC_000006.12_14671;hsa-miR-25-5p;hsa-miR-372-5p;NC_000013.11_28441;hsa-miR-30c-1-3p;NC_000008.11_19445;NC_000023.11_36905;NC_000010.11_23303;hsa-miR-371b-3p;hsa-miR-92a-1-5p;hsa-miR-629-3p;NC_000003.12_7276;hsa-miR-27b-5p;NC_000007.14_17821;NC_000021.9_35751;NC_000012.12_25887;hsa-miR-1298-5p;NC_000010.11_23646;NC_000011.10_25384;NC_000018.10_33742;NC_000005.10_11919>NC_000005.10_1…
MAP2	ENST00000261530	0.484694	1.68064e-81	56	hsa-miR-33b-3p;hsa-miR-372-5p;NC_000013.11_28441;hsa-miR-30c-1-3p;NC_000008.11_19445;NC_000023.11_36905;NC_000010.11_23303;hsa-miR-371b-3p;hsa-miR-498;hsa-miR-629-3p;NC_000003.12_7276;hsa-miR-27b-5p;NC_000007.14_17821;NC_000021.9_35751;NC_000012.12_25887;hsa-miR-1298-5p;NC_000010.11_23646;NC_000011.10_25384;NC_000005.10_11919>NC_000005.10_11920;hsa-miR-302c-5p;hsa-miR-17-5p;hsa-miR-34c-5p;NC_0000…
MAP2	NONHSAT215932	0.647059	1.51382e-80	51	hsa-miR-33b-3p;hsa-miR-372-5p;NC_000013.11_28441;hsa-miR-30c-1-3p;hsa-miR-498;NC_000023.11_36905;NC_000010.11_23303;hsa-miR-7974;hsa-miR-518e-5p>hsa-miR-519a-5p>hsa-miR-519b-5p>hsa-miR-519c-5p>hsa-miR-522-5p>hsa-miR-523-5p;NC_000007.14_17821;NC_000010.11_23646;NC_000021.9_35751;NC_000012.12_25887;NC_000011.10_25384;NC_000005.10_11919>NC_000005.10_11920;hsa-miR-302c-5p;NC_000012.12_26286;NC_000006…
CHD9	ENST00000261530	0.520408	4.911e-80	50	NC_000001.11_2008;hsa-miR-934;NC_000006.12_14671;hsa-miR-30c-1-3p;hsa-miR-498;NC_000010.11_23303;NC_000005.10_12588;hsa-miR-92a-1-5p;hsa-miR-629-3p;NC_000003.12_7276;NC_000007.14_17821;hsa-miR-27b-5p;NC_000021.9_35751;NC_000012.12_25887;hsa-miR-18a-3p;NC_000011.10_25384;NC_000005.10_11919>NC_000005.10_11920;NC_000004.12_9892;hsa-miR-302c-5p;hsa-miR-17-5p;NC_000013.11_27627;hsa-miR-1257;hsa-miR-26…
HIPK3	ENST00000281092	0.445	5.9874e-80	50	NC_000006.12_14671;hsa-miR-372-5p;hsa-miR-30c-1-3p;NC_000008.11_19445;hsa-miR-498;NC_000005.10_12588;hsa-miR-675-5p;hsa-miR-92a-1-5p;NC_000021.9_35751;NC_000012.12_25887;hsa-miR-18a-3p;NC_000011.10_25384;NC_000005.10_11919>NC_000005.10_11920;NC_000004.12_9892;NC_000012.12_26286;NC_000006.12_15769;hsa-miR-17-5p;hsa-miR-34c-5p;NC_000006.12_15809;NC_000013.11_27627;NC_000022.11_36372;hsa-miR-1257;hs…
CREBRF	ENST00000281092	0.495	9.35273e-80	51	NC_000001.11_2008;hsa-miR-934;hsa-miR-30c-1-3p;NC_000008.11_19445;hsa-miR-498;NC_000005.10_12588;hsa-miR-27b-5p;NC_000012.12_25887;hsa-miR-18a-3p;NC_000011.10_25384;NC_000004.12_9892;hsa-miR-302c-5p;NC_000006.12_15769;hsa-miR-17-5p;hsa-miR-34c-5p;NC_000013.11_27627;NC_000022.11_36372;NC_000005.10_14158;hsa-miR-1257;hsa-miR-26a-1-3p;hsa-miR-7-5p;NC_000001.11_3101;NC_000008.11_20037*;NC_000002.12_3…
LCOR	ENST00000261530	0.530612	1.4206e-79	51	hsa-miR-934;hsa-miR-25-5p;hsa-miR-372-5p;hsa-miR-30c-1-3p;NC_000008.11_19445;NC_000023.11_36905;NC_000010.11_23303;NC_000005.10_12588;hsa-miR-629-3p;NC_000003.12_7276;hsa-miR-27b-5p;NC_000007.14_17821;NC_000021.9_35751;hsa-miR-1298-5p;NC_000012.12_25887;NC_000011.10_25384;NC_000018.10_33742;NC_000004.12_9892;hsa-miR-302c-5p;hsa-miR-17-5p;hsa-miR-34c-5p;NC_000013.11_27627;hsa-miR-1257;hsa-miR-26a-…
ARHGAP5	ENST00000281092	0.44	1.92311e-78	48	hsa-miR-372-5p;hsa-miR-30c-1-3p;NC_000008.11_19445;hsa-miR-498;NC_000005.10_12588;hsa-miR-27b-5p;NC_000021.9_35751;NC_000012.12_25887;hsa-miR-18a-3p;NC_000011.10_25384;NC_000004.12_9892;NC_000006.12_15769;hsa-miR-17-5p;NC_000013.11_27627;NC_000022.11_36372;hsa-miR-1257;hsa-miR-26a-1-3p;NC_000001.11_3101;NC_000002.12_3238;NC_000008.11_20037*;NC_000003.12_7973;NC_000011.10_25091;hsa-miR-15b-3p;hsa-…
LYST	NR_038921	0.81	1.94996e-78	51	NC_000001.11_2008;hsa-miR-25-5p;hsa-miR-372-5p;NC_000013.11_28441;hsa-miR-30c-1-3p;NC_000008.11_19445;NC_000005.10_12588;hsa-miR-7974;hsa-miR-518e-5p>hsa-miR-519a-5p>hsa-miR-519b-5p>hsa-miR-519c-5p>hsa-miR-522-5p>hsa-miR-523-5p;hsa-miR-3662;hsa-miR-27b-5p;NC_000007.14_17821;NC_000021.9_35751;hsa-miR-1298-5p;NC_000012.12_25887;NC_000011.10_25384;NC_000009.12_21255;hsa-miR-302c-5p;NC_000012.12_2628…
ZNF704	ENST00000263967	0.671233	3.0239e-78	51	hsa-miR-934;hsa-miR-33b-3p;NC_000013.11_28441;hsa-miR-30c-1-3p;hsa-miR-92a-1-5p;hsa-miR-7974;hsa-miR-629-3p;hsa-miR-3662;NC_000007.14_17821;NC_000010.11_23646;NC_000012.12_25887;NC_000004.12_10500;NC_000011.10_25384;NC_000018.10_33742;NC_000004.12_9892;hsa-miR-302c-5p;NC_000006.12_15769;hsa-miR-17-5p;NC_000013.11_27627;NC_000022.11_36437;hsa-miR-26a-1-3p;hsa-miR-1257;hsa-miR-7-5p;NC_000002.12_323…
CREBRF	ENST00000261530	0.469388	4.13544e-78	51	NC_000001.11_2008;hsa-miR-934;NC_000013.11_28441;hsa-miR-30c-1-3p;NC_000008.11_19445;NC_000023.11_36905;hsa-miR-498;NC_000005.10_12588;NC_000007.14_17821;hsa-miR-27b-5p;NC_000012.12_25887;hsa-miR-18a-3p;NC_000011.10_25384;NC_000018.10_33742;NC_000004.12_9892;hsa-miR-302c-5p;hsa-miR-17-5p;hsa-miR-34c-5p;NC_000013.11_27627;NC_000005.10_14158;hsa-miR-1257;hsa-miR-26a-1-3p;hsa-miR-7-5p;NC_000001.11_3…
HIPK2	ENST00000263967	0.664384	5.55877e-78	53	hsa-miR-934;hsa-miR-33b-3p;hsa-miR-372-5p;NC_000013.11_28441;hsa-miR-30c-1-3p;hsa-miR-498;hsa-miR-371b-3p;hsa-miR-92a-1-5p;hsa-miR-7974;hsa-miR-3662;NC_000007.14_17821;NC_000010.11_23646;NC_000012.12_25887;NC_000004.12_10500;NC_000011.10_25384;NC_000004.12_9892;NC_000005.10_11919>NC_000005.10_11920;NC_000009.12_21255;hsa-miR-302c-5p;NC_000006.12_15769;hsa-miR-17-5p;NC_000013.11_27627;NC_000022.11…
AUTS2	NR_033268	0.779817	1.27535e-77	54	hsa-miR-934;NC_000009.12_21574;hsa-miR-371a-5p;hsa-miR-372-5p;hsa-miR-3155a;NC_000009.12_20733;hsa-miR-30c-1-3p;NC_000023.11_36905;NC_000010.11_23303;hsa-miR-92a-1-5p;hsa-miR-518b;hsa-miR-7974;hsa-miR-518e-5p>hsa-miR-519a-5p>hsa-miR-519b-5p>hsa-miR-519c-5p>hsa-miR-522-5p>hsa-miR-523-5p;NC_000003.12_7276;NC_000007.14_17821;hsa-miR-1298-5p;NC_000010.11_23646;NC_000021.9_35751;NC_000003.12_8583;hsa-…
VTI1A	ENST00000263967	0.643836	1.28937e-77	53	hsa-miR-934;hsa-miR-33b-3p;hsa-miR-372-5p;NC_000013.11_28441;hsa-miR-30c-1-3p;hsa-miR-498;hsa-miR-371b-3p;hsa-miR-92a-1-5p;hsa-miR-7974;hsa-miR-629-3p;hsa-miR-3662;NC_000007.14_17821;NC_000010.11_23646;NC_000012.12_25887;NC_000004.12_10500;NC_000011.10_25384;NC_000004.12_9892;NC_000005.10_11919>NC_000005.10_11920;hsa-miR-302c-5p;NC_000006.12_15769;hsa-miR-17-5p;NC_000022.11_36437;hsa-miR-1257;hsa…
RALGPS2	ENST00000261530	0.423469	1.73097e-77	54	hsa-miR-934;hsa-miR-33b-3p;NC_000006.12_14671;hsa-miR-25-5p;hsa-miR-372-5p;NC_000013.11_28441;hsa-miR-30c-1-3p;NC_000008.11_19445;NC_000023.11_36905;NC_000010.11_23303;hsa-miR-92a-1-5p;hsa-miR-629-3p;NC_000007.14_17821;hsa-miR-27b-5p;hsa-miR-1298-5p;NC_000010.11_23646;NC_000012.12_25887;hsa-miR-18a-3p;NC_000011.10_25384;NC_000004.12_9892;hsa-miR-302c-5p;hsa-miR-34c-5p;NC_000006.12_15809;NC_000013…
SLC38A1	ENST00000281092	0.53	3.82978e-77	51	hsa-miR-934;hsa-miR-33b-3p;NC_000006.12_14671;hsa-miR-372-5p;hsa-miR-30c-1-3p;NC_000008.11_19445;hsa-miR-371b-3p;hsa-miR-92a-1-5p;hsa-miR-629-3p;hsa-miR-27b-5p;NC_000012.12_25887;NC_000011.10_25384;NC_000004.12_9892;hsa-miR-302c-5p;NC_000006.12_15769;hsa-miR-17-5p;hsa-miR-34c-5p;NC_000013.11_27627;NC_000022.11_36372;hsa-miR-1257;hsa-miR-26a-1-3p;hsa-miR-7-5p;NC_000001.11_3101;NC_000002.12_3238;NC…
VTI1A	NR_033268	0.743119	6.96062e-77	55	hsa-miR-934;hsa-miR-371a-5p;hsa-miR-372-5p;NC_000013.11_28441;NC_000009.12_20733;hsa-miR-30c-1-3p;hsa-miR-3155a;NC_000023.11_36905;NC_000010.11_23303;hsa-miR-371b-3p;hsa-miR-92a-1-5p;hsa-miR-518b;hsa-miR-7974;hsa-miR-518e-5p>hsa-miR-519a-5p>hsa-miR-519b-5p>hsa-miR-519c-5p>hsa-miR-522-5p>hsa-miR-523-5p;hsa-miR-629-3p;NC_000007.14_17821;hsa-miR-510-5p;hsa-miR-302a-5p;NC_000021.9_35751;NC_000003.12_…
MEF2A	ENST00000261530	0.418367	1.44644e-76	53	hsa-miR-33b-3p;NC_000006.12_14671;hsa-miR-372-5p;NC_000013.11_28441;hsa-miR-30c-1-3p;NC_000008.11_19445;NC_000023.11_36905;hsa-miR-371b-3p;hsa-miR-498;hsa-miR-92a-1-5p;hsa-miR-629-3p;NC_000003.12_7276;NC_000007.14_17821;hsa-miR-1298-5p;NC_000021.9_35751;NC_000010.11_23646;hsa-miR-18a-3p;NC_000012.12_25887;NC_000011.10_25384;NC_000004.12_9892;hsa-miR-302c-5p;hsa-miR-17-5p;NC_000013.11_27627;NC_000…
ANK2	ENST00000281092	0.585	2.18615e-76	56	hsa-miR-33b-3p;NC_000006.12_14671;hsa-miR-372-5p;hsa-miR-30c-1-3p;NC_000008.11_19445;NC_000010.11_23303;hsa-miR-371b-3p;hsa-miR-675-5p;hsa-miR-92a-1-5p;hsa-miR-629-3p;hsa-miR-1298-5p;hsa-miR-27b-5p;NC_000021.9_35751;NC_000012.12_25887;NC_000011.10_25384;NC_000005.10_11919>NC_000005.10_11920;hsa-miR-302c-5p;NC_000012.12_26286;NC_000006.12_15769;hsa-miR-17-5p;hsa-miR-34c-5p;NC_000006.12_15809;NC_00…
MTMR9	ENST00000281092	0.405	2.11835e-75	51	NC_000001.11_2008;hsa-miR-33b-3p;hsa-miR-372-5p;hsa-miR-30c-1-3p;NC_000008.11_19445;hsa-miR-498;NC_000005.10_12588;hsa-miR-675-5p;hsa-miR-1298-5p;hsa-miR-27b-5p;NC_000021.9_35751;NC_000012.12_25887;NC_000011.10_25384;NC_000004.12_9892;hsa-miR-302c-5p;NC_000012.12_26286;hsa-miR-17-5p;hsa-miR-34c-5p;NC_000013.11_27627;NC_000022.11_36372;NC_000005.10_14158;hsa-miR-1257;hsa-miR-26a-1-3p;hsa-miR-7-5p;…
MAP2	ENST00000263967	0.534247	4.15778e-75	50	hsa-miR-33b-3p;hsa-miR-372-5p;NC_000013.11_28441;hsa-miR-30c-1-3p;hsa-miR-498;hsa-miR-371b-3p;hsa-miR-7974;hsa-miR-629-3p;hsa-miR-3662;NC_000007.14_17821;NC_000010.11_23646;NC_000012.12_25887;NC_000004.12_10500;NC_000011.10_25384;NC_000005.10_11919>NC_000005.10_11920;NC_000009.12_21255;hsa-miR-302c-5p;NC_000006.12_15769;hsa-miR-17-5p;NC_000013.11_27627;NC_000022.11_36437;hsa-miR-1257;hsa-miR-26a-…
PIK3CA	NR_033268	0.623853	4.28186e-75	51	hsa-miR-934;NC_000009.12_21574;hsa-miR-371a-5p;hsa-miR-372-5p;NC_000013.11_28441;NC_000009.12_20733;hsa-miR-30c-1-3p;hsa-miR-3155a;hsa-miR-371b-3p;hsa-miR-92a-1-5p;hsa-miR-7974;hsa-miR-518e-5p>hsa-miR-519a-5p>hsa-miR-519b-5p>hsa-miR-519c-5p>hsa-miR-522-5p>hsa-miR-523-5p;hsa-miR-629-3p;NC_000007.14_17821;hsa-miR-302a-5p;NC_000010.11_23646;NC_000003.12_8583;NC_000012.12_25887;NC_000004.12_9958;hsa-…
ABCC4	ENST00000281092	0.39	1.51405e-74	50	hsa-miR-33b-3p;hsa-miR-372-5p;hsa-miR-30c-1-3p;NC_000008.11_19445;NC_000010.11_23303;NC_000005.10_12588;hsa-miR-92a-1-5p;hsa-miR-629-3p;hsa-miR-1298-5p;NC_000021.9_35751;NC_000012.12_25887;hsa-miR-18a-3p;NC_000004.12_9892;NC_000005.10_11919>NC_000005.10_11920;hsa-miR-302c-5p;NC_000012.12_26286;NC_000006.12_15769;hsa-miR-17-5p;NC_000013.11_27627;NC_000022.11_36372;NC_000005.10_14158;hsa-miR-1257;N…
ZNF704	ENST00000261530	0.545918	1.58314e-74	53	hsa-miR-934;hsa-miR-33b-3p;NC_000006.12_14671;NC_000013.11_28441;hsa-miR-30c-1-3p;NC_000023.11_36905;hsa-miR-92a-1-5p;hsa-miR-629-3p;NC_000003.12_7276;NC_000007.14_17821;hsa-miR-27b-5p;NC_000021.9_35751;NC_000010.11_23646;hsa-miR-18a-3p;NC_000012.12_25887;NC_000011.10_25384;NC_000018.10_33742;NC_000004.12_9892;hsa-miR-302c-5p;hsa-miR-17-5p;hsa-miR-34c-5p;NC_000013.11_27627;NC_000022.11_36437;hsa-…
SLC39A10	NR_038921	0.71	2.02733e-74	47	NC_000001.11_2008;hsa-miR-25-5p;hsa-miR-372-5p;NC_000013.11_28441;hsa-miR-30c-1-3p;NC_000008.11_19445;hsa-miR-371b-3p;NC_000005.10_12588;hsa-miR-7974;hsa-miR-518e-5p>hsa-miR-519a-5p>hsa-miR-519b-5p>hsa-miR-519c-5p>hsa-miR-522-5p>hsa-miR-523-5p;hsa-miR-3662;hsa-miR-27b-5p;NC_000007.14_17821;hsa-miR-1298-5p;NC_000012.12_25887;NC_000011.10_25384;NC_000005.10_11919>NC_000005.10_11920;hsa-miR-302c-5p;…
KDM7A	ENST00000261530	0.469388	3.59679e-74	50	hsa-miR-934;hsa-miR-25-5p;hsa-miR-498;NC_000008.11_19445;NC_000010.11_23303;NC_000005.10_12588;hsa-miR-92a-1-5p;hsa-miR-629-3p;NC_000007.14_17821;NC_000010.11_23646;NC_000021.9_35751;NC_000012.12_25887;hsa-miR-18a-3p;NC_000011.10_25384;NC_000018.10_33742;NC_000004.12_9892;NC_000005.10_11919>NC_000005.10_11920;hsa-miR-302c-5p;hsa-miR-17-5p;hsa-miR-34c-5p;NC_000005.10_14158;hsa-miR-26a-1-3p;hsa-miR…
ARHGAP5	ENST00000261530	0.438776	3.87513e-74	47	hsa-miR-372-5p;hsa-miR-30c-1-3p;NC_000008.11_19445;NC_000023.11_36905;hsa-miR-498;NC_000005.10_12588;NC_000007.14_17821;hsa-miR-27b-5p;NC_000021.9_35751;NC_000012.12_25887;hsa-miR-18a-3p;NC_000011.10_25384;NC_000018.10_33742;NC_000004.12_9892;hsa-miR-17-5p;NC_000013.11_27627;hsa-miR-1257;hsa-miR-26a-1-3p;NC_000001.11_3101;NC_000002.12_3238;NC_000003.12_7973;hsa-miR-519a-3p;hsa-miR-345-5p;hsa-miR-…
ATP2B4	ENST00000261530	0.392857	4.34864e-74	52	NC_000001.11_2008;hsa-miR-934;NC_000006.12_14671;hsa-miR-372-5p;NC_000013.11_28441;hsa-miR-30c-1-3p;hsa-miR-498;NC_000023.11_36905;NC_000010.11_23303;hsa-miR-371b-3p;hsa-miR-92a-1-5p;NC_000005.10_12588;hsa-miR-629-3p;NC_000007.14_17821;hsa-miR-27b-5p;NC_000010.11_23646;NC_000021.9_35751;NC_000012.12_25887;hsa-miR-18a-3p;NC_000011.10_25384;NC_000018.10_33742;NC_000004.12_9892;NC_000005.10_11919>NC…
UBR3	ENST00000281092	0.4	1.4455e-73	46	NC_000001.11_2008;hsa-miR-934;hsa-miR-33b-3p;hsa-miR-372-5p;hsa-miR-30c-1-3p;hsa-miR-498;NC_000010.11_23303;NC_000005.10_12588;hsa-miR-92a-1-5p;hsa-miR-629-3p;NC_000012.12_25887;NC_000011.10_25384;NC_000005.10_11919>NC_000005.10_11920;NC_000004.12_9892;hsa-miR-302c-5p;NC_000012.12_26286;NC_000006.12_15769;hsa-miR-17-5p;NC_000013.11_27627;hsa-miR-1257;NC_000008.11_20037*;NC_000002.12_3238;NC_00000…
NCOA3	ENST00000261530	0.428571	1.61025e-73	49	hsa-miR-33b-3p;NC_000006.12_14671;hsa-miR-25-5p;hsa-miR-372-5p;NC_000013.11_28441;hsa-miR-30c-1-3p;NC_000008.11_19445;NC_000023.11_36905;NC_000010.11_23303;hsa-miR-498;hsa-miR-92a-1-5p;NC_000005.10_12588;hsa-miR-629-3p;NC_000007.14_17821;NC_000010.11_23646;NC_000012.12_25887;hsa-miR-18a-3p;NC_000011.10_25384;NC_000018.10_33742;NC_000004.12_9892;hsa-miR-302c-5p;hsa-miR-17-5p;NC_000022.11_36437;hsa…
GALNT5	NR_033268	0.66055	1.76287e-73	52	NC_000009.12_21574;hsa-miR-371a-5p;hsa-miR-372-5p;NC_000013.11_28441;NC_000009.12_20733;hsa-miR-30c-1-3p;NC_000010.11_23303;hsa-miR-371b-3p;hsa-miR-92a-1-5p;hsa-miR-518e-5p>hsa-miR-519a-5p>hsa-miR-519b-5p>hsa-miR-519c-5p>hsa-miR-522-5p>hsa-miR-523-5p;hsa-miR-629-3p;NC_000007.14_17821;hsa-miR-302a-5p;hsa-miR-510-5p;NC_000003.12_8583;hsa-miR-1298-5p;hsa-miR-18a-3p;NC_000010.11_23646;NC_000012.12_25…
EGFR	ENST00000261530	0.346939	2.63842e-73	47	NC_000001.11_2008;NC_000006.12_14671;hsa-miR-25-5p;hsa-miR-372-5p;NC_000008.11_19445;NC_000023.11_36905;hsa-miR-371b-3p;hsa-miR-92a-1-5p;hsa-miR-629-3p;hsa-miR-1298-5p;NC_000010.11_23646;NC_000012.12_25887;NC_000011.10_25384;NC_000018.10_33742;hsa-miR-17-5p;hsa-miR-34c-5p;NC_000013.11_27627;NC_000005.10_14158;NC_000022.11_36437;hsa-miR-26a-1-3p;hsa-miR-7-5p;NC_000002.12_3238;NC_000003.12_7973;NC_…
CPEB2	ENST00000261530	0.382653	3.27091e-73	51	hsa-miR-934;hsa-miR-33b-3p;NC_000006.12_14671;hsa-miR-25-5p;NC_000013.11_28441;NC_000011.10_24389*;hsa-miR-30c-1-3p;NC_000008.11_19445;NC_000023.11_36905;hsa-miR-371b-3p;hsa-miR-498;hsa-miR-92a-1-5p;NC_000005.10_12588;hsa-miR-629-3p;NC_000007.14_17821;NC_000010.11_23646;hsa-miR-18a-3p;NC_000011.10_25384;NC_000004.12_9892;hsa-miR-302c-5p;hsa-miR-17-5p;hsa-miR-34c-5p;NC_000006.12_15809;NC_000005.10…
DENND4A	NR_038921	0.65	3.38208e-73	46	NC_000001.11_2008;NC_000013.11_28441;hsa-miR-30c-1-3p;NC_000008.11_19445;hsa-miR-371b-3p;NC_000005.10_12588;hsa-miR-518e-5p>hsa-miR-519a-5p>hsa-miR-519b-5p>hsa-miR-519c-5p>hsa-miR-522-5p>hsa-miR-523-5p;hsa-miR-3662;hsa-miR-27b-5p;NC_000007.14_17821;NC_000021.9_35751;hsa-miR-1298-5p;NC_000012.12_25887;NC_000011.10_25384;NC_000005.10_11919>NC_000005.10_11920;NC_000004.12_9892;NC_000009.12_21255;NC_…
DNAJC10	ENST00000261530	0.382653	4.38769e-73	46	hsa-miR-934;NC_000006.12_14671;hsa-miR-372-5p;NC_000013.11_28441;hsa-miR-30c-1-3p;NC_000008.11_19445;hsa-miR-498;NC_000005.10_12588;hsa-miR-92a-1-5p;NC_000003.12_7276;NC_000007.14_17821;hsa-miR-1298-5p;NC_000012.12_25887;hsa-miR-18a-3p;NC_000011.10_25384;NC_000004.12_9892;hsa-miR-302c-5p;hsa-miR-17-5p;hsa-miR-34c-5p;NC_000013.11_27627;NC_000005.10_14158;hsa-miR-1257;hsa-miR-26a-1-3p;hsa-miR-7-5p;…
MAP3K2	NR_033268	0.614679	4.6397e-73	50	hsa-miR-934;hsa-miR-371a-5p;hsa-miR-372-5p;NC_000013.11_28441;NC_000009.12_20733;hsa-miR-30c-1-3p;hsa-miR-3155a;NC_000023.11_36905;NC_000010.11_23303;hsa-miR-371b-3p;hsa-miR-92a-1-5p;NC_000003.12_7276;NC_000007.14_17821;hsa-miR-1298-5p;NC_000010.11_23646;NC_000003.12_8583;NC_000012.12_25887;hsa-miR-629-3p;hsa-miR-302c-5p;NC_000012.12_26286;hsa-miR-17-5p;NC_000006.12_15769;NC_000022.11_36372;hsa-m…
HIPK3	ENST00000261530	0.372449	5.81988e-73	48	NC_000006.12_14671;hsa-miR-372-5p;hsa-miR-30c-1-3p;NC_000008.11_19445;NC_000023.11_36905;hsa-miR-498;NC_000005.10_12588;hsa-miR-92a-1-5p;NC_000021.9_35751;NC_000012.12_25887;hsa-miR-18a-3p;NC_000011.10_25384;NC_000005.10_11919>NC_000005.10_11920;NC_000004.12_9892;hsa-miR-17-5p;hsa-miR-34c-5p;NC_000006.12_15809;NC_000013.11_27627;hsa-miR-1257;hsa-miR-7-5p;NC_000001.11_3101;NC_000002.12_3238;NC_000…
GFPT1	ENST00000281092	0.475	8.30435e-73	51	NC_000001.11_2008;hsa-miR-934;hsa-miR-33b-3p;hsa-miR-372-5p;hsa-miR-30c-1-3p;NC_000008.11_19445;hsa-miR-498;hsa-miR-371b-3p;hsa-miR-92a-1-5p;hsa-miR-629-3p;hsa-miR-1298-5p;hsa-miR-27b-5p;NC_000012.12_25887;hsa-miR-18a-3p;NC_000004.12_9892;NC_000005.10_11919>NC_000005.10_11920;hsa-miR-302c-5p;NC_000012.12_26286;NC_000006.12_15769;hsa-miR-17-5p;hsa-miR-34c-5p;NC_000006.12_15809;NC_000013.11_27627;N…
SLC38A1	ENST00000263967	0.506849	9.0702e-73	47	hsa-miR-934;hsa-miR-33b-3p;hsa-miR-372-5p;NC_000013.11_28441;hsa-miR-30c-1-3p;hsa-miR-371b-3p;hsa-miR-92a-1-5p;hsa-miR-7974;hsa-miR-629-3p;hsa-miR-3662;NC_000012.12_25887;NC_000004.12_10500;NC_000011.10_25384;NC_000018.10_33742;NC_000004.12_9892;NC_000009.12_21255;hsa-miR-302c-5p;NC_000006.12_15769;hsa-miR-17-5p;NC_000013.11_27627;hsa-miR-26a-1-3p;hsa-miR-1257;hsa-miR-7-5p;NC_000002.12_3238;NC_00…
HIPK2	NONHSAT215932	0.773109	9.43111e-73	50	hsa-miR-934;hsa-miR-33b-3p;hsa-miR-372-5p;NC_000013.11_28441;hsa-miR-30c-1-3p;hsa-miR-498;NC_000023.11_36905;NC_000010.11_23303;hsa-miR-92a-1-5p;hsa-miR-7974;hsa-miR-518e-5p>hsa-miR-519a-5p>hsa-miR-519b-5p>hsa-miR-519c-5p>hsa-miR-522-5p>hsa-miR-523-5p;NC_000007.14_17821;NC_000010.11_23646;NC_000021.9_35751;NC_000012.12_25887;NC_000011.10_25384;NC_000005.10_11919>NC_000005.10_11920;hsa-miR-302c-5p…
MAP2	NR_033268	0.633028	9.53503e-73	51	hsa-miR-372-5p;hsa-miR-3155a;NC_000013.11_28441;hsa-miR-30c-1-3p;NC_000023.11_36905;NC_000010.11_23303;hsa-miR-371b-3p;hsa-miR-7974;hsa-miR-518e-5p>hsa-miR-519a-5p>hsa-miR-519b-5p>hsa-miR-519c-5p>hsa-miR-522-5p>hsa-miR-523-5p;NC_000003.12_7276;NC_000007.14_17821;hsa-miR-302a-5p;hsa-miR-510-5p;NC_000021.9_35751;NC_000003.12_8583;hsa-miR-1298-5p;NC_000010.11_23646;NC_000012.12_25887;hsa-miR-629-3p;…
KIF3A	ENST00000281092	0.36	1.02214e-72	43	hsa-miR-33b-3p;hsa-miR-372-5p;hsa-miR-30c-1-3p;hsa-miR-498;NC_000008.11_19445;hsa-miR-629-3p;NC_000012.12_25887;NC_000011.10_25384;NC_000004.12_9892;hsa-miR-302c-5p;NC_000006.12_15769;hsa-miR-17-5p;NC_000013.11_27627;NC_000022.11_36372;hsa-miR-26a-1-3p;hsa-miR-7-5p;NC_000003.12_7973;NC_000012.12_25503;hsa-miR-15b-3p;hsa-miR-345-5p;hsa-miR-3529-3p;hsa-miR-515-5p;NC_000020.11_35116;NC_000003.12_752…
MAP3K2	ENST00000263967	0.616438	1.69213e-72	48	hsa-miR-934;hsa-miR-33b-3p;hsa-miR-372-5p;NC_000013.11_28441;hsa-miR-30c-1-3p;hsa-miR-498;hsa-miR-371b-3p;hsa-miR-92a-1-5p;hsa-miR-629-3p;hsa-miR-3662;NC_000007.14_17821;NC_000010.11_23646;NC_000012.12_25887;NC_000004.12_10500;NC_000011.10_25384;NC_000018.10_33742;hsa-miR-302c-5p;NC_000006.12_15769;hsa-miR-17-5p;NC_000013.11_27627;NC_000022.11_36437;hsa-miR-1257;hsa-miR-26a-1-3p;hsa-miR-7-5p;NC_0…
MAP2	NR_038921	0.68	3.27631e-72	48	hsa-miR-372-5p;NC_000013.11_28441;hsa-miR-30c-1-3p;NC_000008.11_19445;hsa-miR-371b-3p;hsa-miR-7974;hsa-miR-518e-5p>hsa-miR-519a-5p>hsa-miR-519b-5p>hsa-miR-519c-5p>hsa-miR-522-5p>hsa-miR-523-5p;hsa-miR-3662;hsa-miR-27b-5p;NC_000007.14_17821;NC_000021.9_35751;hsa-miR-1298-5p;NC_000012.12_25887;NC_000011.10_25384;NC_000005.10_11919>NC_000005.10_11920;NC_000009.12_21255;hsa-miR-302c-5p;NC_000012.12_2…
UBR3	ENST00000261530	0.362245	3.28878e-72	46	NC_000001.11_2008;hsa-miR-934;hsa-miR-33b-3p;hsa-miR-372-5p;NC_000013.11_28441;hsa-miR-30c-1-3p;hsa-miR-498;NC_000023.11_36905;NC_000010.11_23303;NC_000005.10_12588;hsa-miR-92a-1-5p;hsa-miR-629-3p;NC_000012.12_25887;NC_000011.10_25384;NC_000018.10_33742;NC_000005.10_11919>NC_000005.10_11920;NC_000004.12_9892;hsa-miR-302c-5p;hsa-miR-17-5p;NC_000013.11_27627;hsa-miR-1257;NC_000002.12_3238;NC_000003…
ERN1	NR_033268	0.513761	4.71878e-72	49	NC_000009.12_21574;hsa-miR-372-5p;hsa-miR-3155a;hsa-miR-30c-1-3p;hsa-miR-371b-3p;NC_000010.11_23303;hsa-miR-92a-1-5p;hsa-miR-518e-5p>hsa-miR-519a-5p>hsa-miR-519b-5p>hsa-miR-519c-5p>hsa-miR-522-5p>hsa-miR-523-5p;NC_000003.12_7276;NC_000007.14_17821;hsa-miR-510-5p;hsa-miR-1298-5p;NC_000021.9_35751;NC_000003.12_8583;hsa-miR-18a-3p;NC_000010.11_23646;NC_000012.12_25887;hsa-miR-629-3p;hsa-miR-302c-5p;…
ZEB1	ENST00000281092	0.465	5.85726e-72	46	hsa-miR-372-5p;hsa-miR-30c-1-3p;NC_000008.11_19445;hsa-miR-675-5p;hsa-miR-92a-1-5p;hsa-miR-629-3p;hsa-miR-1298-5p;NC_000021.9_35751;NC_000012.12_25887;hsa-miR-18a-3p;NC_000011.10_25384;NC_000004.12_9892;hsa-miR-302c-5p;NC_000012.12_26286;NC_000006.12_15769;hsa-miR-34c-5p;NC_000013.11_27627;hsa-miR-26a-1-3p;hsa-miR-7-5p;NC_000001.11_3101;NC_000008.11_20037*;NC_000002.12_3238;NC_000012.12_25503;NC_…
ANK2	NONHSAT215932	0.840336	9.13459e-72	50	hsa-miR-33b-3p;hsa-miR-372-5p;NC_000013.11_28441;hsa-miR-30c-1-3p;NC_000023.11_36905;NC_000010.11_23303;hsa-miR-92a-1-5p;hsa-miR-7974;hsa-miR-518e-5p>hsa-miR-519a-5p>hsa-miR-519b-5p>hsa-miR-519c-5p>hsa-miR-522-5p>hsa-miR-523-5p;NC_000007.14_17821;NC_000010.11_23646;NC_000021.9_35751;NC_000012.12_25887;NC_000011.10_25384;NC_000005.10_11919>NC_000005.10_11920;hsa-miR-302c-5p;NC_000012.12_26286;NC_0…
GFPT1	ENST00000263967	0.575342	1.32636e-71	48	hsa-miR-934;hsa-miR-33b-3p;hsa-miR-372-5p;hsa-miR-30c-1-3p;hsa-miR-498;hsa-miR-371b-3p;hsa-miR-92a-1-5p;hsa-miR-629-3p;hsa-miR-3662;NC_000007.14_17821;NC_000010.11_23646;NC_000012.12_25887;NC_000018.10_33742;NC_000004.12_9892;NC_000005.10_11919>NC_000005.10_11920;NC_000009.12_21255;hsa-miR-302c-5p;NC_000006.12_15769;hsa-miR-17-5p;NC_000013.11_27627;NC_000022.11_36437;hsa-miR-7-5p;NC_000011.10_250…
ZNF704	ENST00000281092	0.565	2.11466e-71	51	hsa-miR-934;hsa-miR-33b-3p;NC_000006.12_14671;hsa-miR-30c-1-3p;hsa-miR-92a-1-5p;hsa-miR-629-3p;hsa-miR-27b-5p;NC_000021.9_35751;NC_000012.12_25887;hsa-miR-18a-3p;NC_000011.10_25384;NC_000004.12_9892;hsa-miR-302c-5p;NC_000012.12_26286;NC_000006.12_15769;hsa-miR-17-5p;hsa-miR-34c-5p;NC_000013.11_27627;NC_000022.11_36372;hsa-miR-1257;hsa-miR-26a-1-3p;hsa-miR-7-5p;NC_000001.11_3101;NC_000008.11_20037…
MTMR9	ENST00000261530	0.387755	2.68974e-71	50	NC_000001.11_2008;hsa-miR-33b-3p;hsa-miR-25-5p;hsa-miR-372-5p;NC_000013.11_28441;hsa-miR-30c-1-3p;NC_000008.11_19445;NC_000023.11_36905;hsa-miR-498;NC_000005.10_12588;NC_000003.12_7276;hsa-miR-1298-5p;hsa-miR-27b-5p;NC_000010.11_23646;NC_000021.9_35751;NC_000012.12_25887;NC_000011.10_25384;NC_000004.12_9892;hsa-miR-302c-5p;hsa-miR-17-5p;hsa-miR-34c-5p;NC_000013.11_27627;NC_000005.10_14158;hsa-miR…
GFPT1	ENST00000261530	0.413265	3.62041e-71	51	NC_000001.11_2008;hsa-miR-934;hsa-miR-33b-3p;hsa-miR-372-5p;hsa-miR-30c-1-3p;NC_000008.11_19445;hsa-miR-498;hsa-miR-371b-3p;hsa-miR-92a-1-5p;hsa-miR-629-3p;NC_000007.14_17821;hsa-miR-27b-5p;hsa-miR-1298-5p;NC_000010.11_23646;NC_000012.12_25887;hsa-miR-18a-3p;NC_000018.10_33742;NC_000004.12_9892;NC_000005.10_11919>NC_000005.10_11920;hsa-miR-302c-5p;hsa-miR-17-5p;hsa-miR-34c-5p;NC_000006.12_15809;N…
MAP2	ENST00000281092	0.43	5.92442e-71	51	hsa-miR-33b-3p;hsa-miR-372-5p;hsa-miR-30c-1-3p;hsa-miR-498;NC_000008.11_19445;NC_000010.11_23303;hsa-miR-371b-3p;hsa-miR-629-3p;hsa-miR-1298-5p;hsa-miR-27b-5p;NC_000021.9_35751;NC_000012.12_25887;NC_000011.10_25384;NC_000005.10_11919>NC_000005.10_11920;hsa-miR-302c-5p;NC_000012.12_26286;NC_000006.12_15769;hsa-miR-17-5p;hsa-miR-34c-5p;NC_000006.12_15809;NC_000013.11_27627;hsa-miR-1257;hsa-miR-26a-…
MEF2A	ENST00000281092	0.41	7.47372e-71	50	hsa-miR-33b-3p;NC_000006.12_14671;hsa-miR-372-5p;hsa-miR-30c-1-3p;NC_000008.11_19445;hsa-miR-498;hsa-miR-371b-3p;hsa-miR-675-5p;hsa-miR-92a-1-5p;hsa-miR-629-3p;hsa-miR-1298-5p;NC_000021.9_35751;NC_000012.12_25887;hsa-miR-18a-3p;NC_000011.10_25384;NC_000004.12_9892;hsa-miR-302c-5p;NC_000006.12_15769;hsa-miR-17-5p;NC_000013.11_27627;NC_000022.11_36372;hsa-miR-1257;hsa-miR-26a-1-3p;hsa-miR-7-5p;NC_0…
ASPH	ENST00000263967	0.438356	1.13438e-70	45	hsa-miR-934;hsa-miR-33b-3p;hsa-miR-372-5p;hsa-miR-30c-1-3p;hsa-miR-498;hsa-miR-92a-1-5p;hsa-miR-7974;hsa-miR-629-3p;hsa-miR-3662;NC_000010.11_23646;NC_000012.12_25887;NC_000004.12_10500;NC_000018.10_33742;NC_000009.12_21255;NC_000006.12_15769;hsa-miR-17-5p;NC_000013.11_27627;NC_000022.11_36437;hsa-miR-26a-1-3p;hsa-miR-1257;hsa-miR-7-5p;NC_000002.12_3238;NC_000011.10_25091;hsa-miR-519a-3p;NC_00001…
KDM7A	ENST00000281092	0.47	1.27136e-70	48	hsa-miR-934;hsa-miR-498;NC_000008.11_19445;NC_000010.11_23303;NC_000005.10_12588;hsa-miR-92a-1-5p;hsa-miR-629-3p;NC_000021.9_35751;NC_000012.12_25887;hsa-miR-18a-3p;NC_000011.10_25384;NC_000004.12_9892;NC_000005.10_11919>NC_000005.10_11920;hsa-miR-302c-5p;NC_000006.12_15769;hsa-miR-17-5p;hsa-miR-34c-5p;NC_000022.11_36372;NC_000005.10_14158;hsa-miR-26a-1-3p;hsa-miR-7-5p;NC_000002.12_3238;NC_000003…
LYST	ENST00000263967	0.609589	1.61613e-70	49	hsa-miR-934;hsa-miR-33b-3p;hsa-miR-372-5p;NC_000013.11_28441;hsa-miR-30c-1-3p;hsa-miR-498;hsa-miR-92a-1-5p;hsa-miR-7974;hsa-miR-629-3p;hsa-miR-3662;NC_000007.14_17821;NC_000010.11_23646;NC_000012.12_25887;NC_000011.10_25384;NC_000009.12_21255;hsa-miR-302c-5p;NC_000006.12_15769;hsa-miR-17-5p;NC_000013.11_27627;NC_000022.11_36437;hsa-miR-26a-1-3p;hsa-miR-7-5p;NC_000002.12_3238;hsa-miR-519a-3p;NC_00…
KLHL28	ENST00000281092	0.4	1.80494e-70	43	hsa-miR-934;NC_000006.12_14671;hsa-miR-372-5p;hsa-miR-30c-1-3p;NC_000008.11_19445;hsa-miR-498;NC_000005.10_12588;hsa-miR-629-3p;NC_000021.9_35751;NC_000012.12_25887;NC_000011.10_25384;NC_000004.12_9892;hsa-miR-302c-5p;NC_000012.12_26286;hsa-miR-17-5p;NC_000022.11_36372;hsa-miR-1257;hsa-miR-7-5p;NC_000002.12_3238;NC_000003.12_7973;hsa-miR-15b-3p;hsa-miR-3529-3p;hsa-miR-515-5p;NC_000020.11_35116;NC…
LYST	ENST00000237264	0.788235	2.64132e-70	48	NC_000001.11_2008;hsa-miR-33b-3p;NC_000006.12_14671;NC_000013.11_28441;NC_000005.10_12140;NC_000008.11_19445;NC_000005.10_12588;hsa-miR-92a-1-5p;hsa-miR-7974;hsa-miR-518e-5p>hsa-miR-519a-5p>hsa-miR-519b-5p>hsa-miR-519c-5p>hsa-miR-522-5p>hsa-miR-523-5p;hsa-miR-3662;hsa-miR-510-5p;hsa-miR-1298-5p;NC_000021.9_35751;hsa-miR-27b-5p;NC_000012.12_25887;NC_000011.10_25384;hsa-miR-302c-5p;NC_000006.12_157…
HIPK2	ENST00000237264	0.870588	3.9026e-70	49	hsa-miR-33b-3p;NC_000006.12_14671;NC_000013.11_28441;NC_000005.10_12140;NC_000008.11_19445;NC_000005.10_12588;hsa-miR-675-5p;hsa-miR-92a-1-5p;hsa-miR-7974;hsa-miR-518e-5p>hsa-miR-519a-5p>hsa-miR-519b-5p>hsa-miR-519c-5p>hsa-miR-522-5p>hsa-miR-523-5p;hsa-miR-3662;hsa-miR-1298-5p;hsa-miR-510-5p;NC_000021.9_35751;NC_000012.12_25887;hsa-miR-18a-3p;NC_000011.10_25384;NC_000005.10_11919>NC_000005.10_119…
HIPK2	NR_038921	0.83	3.9026e-70	49	hsa-miR-372-5p;NC_000013.11_28441;hsa-miR-30c-1-3p;NC_000008.11_19445;hsa-miR-371b-3p;NC_000005.10_12588;hsa-miR-7974;hsa-miR-518e-5p>hsa-miR-519a-5p>hsa-miR-519b-5p>hsa-miR-519c-5p>hsa-miR-522-5p>hsa-miR-523-5p;hsa-miR-3662;NC_000007.14_17821;hsa-miR-1298-5p;NC_000021.9_35751;NC_000012.12_25887;NC_000011.10_25384;NC_000005.10_11919>NC_000005.10_11920;NC_000004.12_9892;NC_000009.12_21255;hsa-miR-…
GALNT5	ENST00000261530	0.52551	6.60669e-70	52	hsa-miR-33b-3p;NC_000006.12_14671;hsa-miR-25-5p;hsa-miR-372-5p;NC_000013.11_28441;hsa-miR-30c-1-3p;NC_000008.11_19445;NC_000010.11_23303;hsa-miR-371b-3p;hsa-miR-92a-1-5p;hsa-miR-629-3p;NC_000007.14_17821;hsa-miR-1298-5p;NC_000010.11_23646;NC_000012.12_25887;hsa-miR-18a-3p;NC_000011.10_25384;NC_000018.10_33742;hsa-miR-302c-5p;hsa-miR-17-5p;hsa-miR-34c-5p;NC_000013.11_27627;NC_000022.11_36437;hsa-m…
TTN	NR_033268	0.733945	6.9294e-70	50	hsa-miR-934;hsa-miR-372-5p;hsa-miR-3155a;NC_000013.11_28441;hsa-miR-30c-1-3p;NC_000023.11_36905;NC_000010.11_23303;hsa-miR-371b-3p;hsa-miR-92a-1-5p;hsa-miR-518b;hsa-miR-7974;NC_000003.12_7276;NC_000007.14_17821;hsa-miR-629-3p;NC_000021.9_35751;NC_000012.12_25887;hsa-miR-18a-3p;hsa-miR-302c-5p;NC_000012.12_26286;hsa-miR-17-5p;NC_000006.12_15769;NC_000022.11_36372;NC_000005.10_14158;hsa-miR-26a-1-3…
VTI1A	NONHSAT215932	0.697479	8.22602e-70	49	hsa-miR-934;hsa-miR-33b-3p;hsa-miR-372-5p;NC_000013.11_28441;hsa-miR-30c-1-3p;hsa-miR-498;NC_000023.11_36905;NC_000010.11_23303;hsa-miR-92a-1-5p;hsa-miR-7974;hsa-miR-518e-5p>hsa-miR-519a-5p>hsa-miR-519b-5p>hsa-miR-519c-5p>hsa-miR-522-5p>hsa-miR-523-5p;NC_000007.14_17821;NC_000010.11_23646;NC_000021.9_35751;NC_000012.12_25887;NC_000011.10_25384;NC_000005.10_11919>NC_000005.10_11920;hsa-miR-302c-5p…
MAP3K2	ENST00000261530	0.505102	9.20542e-70	50	hsa-miR-934;hsa-miR-33b-3p;hsa-miR-372-5p;NC_000013.11_28441;hsa-miR-30c-1-3p;hsa-miR-498;NC_000023.11_36905;NC_000010.11_23303;hsa-miR-371b-3p;hsa-miR-92a-1-5p;hsa-miR-629-3p;NC_000003.12_7276;NC_000007.14_17821;hsa-miR-1298-5p;NC_000010.11_23646;NC_000012.12_25887;NC_000011.10_25384;NC_000018.10_33742;hsa-miR-302c-5p;hsa-miR-17-5p;hsa-miR-34c-5p;NC_000013.11_27627;NC_000022.11_36437;hsa-miR-125…
CREBRF	ENST00000263967	0.5	1.43234e-69	45	hsa-miR-934;NC_000013.11_28441;hsa-miR-30c-1-3p;hsa-miR-498;hsa-miR-7974;NC_000007.14_17821;NC_000012.12_25887;NC_000011.10_25384;NC_000018.10_33742;NC_000004.12_9892;NC_000009.12_21255;hsa-miR-302c-5p;NC_000006.12_15769;hsa-miR-17-5p;NC_000013.11_27627;hsa-miR-26a-1-3p;hsa-miR-1257;hsa-miR-7-5p;NC_000002.12_3238;NC_000011.10_25091;hsa-miR-519a-3p;hsa-miR-15b-3p;NC_000003.12_7520;NC_000020.11_351…
RALGPS2	ENST00000281092	0.445	1.82782e-69	50	hsa-miR-934;hsa-miR-33b-3p;NC_000006.12_14671;hsa-miR-372-5p;hsa-miR-30c-1-3p;NC_000008.11_19445;NC_000010.11_23303;hsa-miR-92a-1-5p;hsa-miR-629-3p;hsa-miR-1298-5p;hsa-miR-27b-5p;NC_000012.12_25887;hsa-miR-18a-3p;NC_000011.10_25384;NC_000004.12_9892;hsa-miR-302c-5p;NC_000006.12_15769;hsa-miR-34c-5p;NC_000006.12_15809;NC_000013.11_27627;NC_000022.11_36372;hsa-miR-1257;hsa-miR-26a-1-3p;hsa-miR-7-5p…
MAP3K2	NONHSAT215932	0.806723	1.98502e-69	46	hsa-miR-934;hsa-miR-33b-3p;hsa-miR-372-5p;NC_000013.11_28441;hsa-miR-30c-1-3p;hsa-miR-498;NC_000023.11_36905;NC_000010.11_23303;hsa-miR-92a-1-5p;NC_000007.14_17821;NC_000010.11_23646;NC_000012.12_25887;NC_000011.10_25384;hsa-miR-302c-5p;NC_000012.12_26286;NC_000006.12_15769;hsa-miR-17-5p;hsa-miR-34c-5p;NC_000013.11_27627;hsa-miR-1257;hsa-miR-26a-1-3p;NC_000002.12_3238;NC_000003.12_9133;NC_000003.…
TTN	NONHSAT215932	0.89916	3.30035e-69	47	hsa-miR-934;hsa-miR-33b-3p;hsa-miR-372-5p;NC_000013.11_28441;hsa-miR-30c-1-3p;NC_000023.11_36905;NC_000010.11_23303;hsa-miR-92a-1-5p;hsa-miR-7974;NC_000007.14_17821;NC_000021.9_35751;NC_000012.12_25887;NC_000011.10_25384;NC_000005.10_11919>NC_000005.10_11920;hsa-miR-302c-5p;NC_000012.12_26286;NC_000006.12_15769;hsa-miR-17-5p;hsa-miR-34c-5p;NC_000005.10_14158;hsa-miR-1257;hsa-miR-26a-1-3p;NC_00000…
SH2B3	NR_033268	0.541284	1.32756e-68	47	hsa-miR-934;NC_000009.12_21574;hsa-miR-371a-5p;hsa-miR-3155a;NC_000009.12_20733;hsa-miR-30c-1-3p;NC_000023.11_36905;NC_000010.11_23303;hsa-miR-371b-3p;hsa-miR-92a-1-5p;hsa-miR-7974;NC_000003.12_7276;hsa-miR-302a-5p;NC_000003.12_8583;NC_000012.12_25887;hsa-miR-18a-3p;NC_000004.12_9958;NC_000012.12_26286;NC_000006.12_15769;hsa-miR-17-5p;NC_000022.11_36372;NC_000005.10_14158;hsa-miR-26a-1-3p;hsa-miR…
FBXO32	ENST00000281092	0.34	1.52808e-68	46	NC_000006.12_14671;hsa-miR-372-5p;hsa-miR-30c-1-3p;NC_000008.11_19445;NC_000010.11_23303;hsa-miR-371b-3p;hsa-miR-675-5p;NC_000005.10_12588;hsa-miR-629-3p;NC_000012.12_25887;hsa-miR-18a-3p;NC_000011.10_25384;NC_000004.12_9892;hsa-miR-302c-5p;NC_000012.12_26286;NC_000006.12_15769;hsa-miR-17-5p;hsa-miR-34c-5p;NC_000013.11_27627;NC_000022.11_36372;hsa-miR-1257;hsa-miR-26a-1-3p;hsa-miR-7-5p;NC_000001.…
ZNF704	NR_033268	0.678899	2.44428e-68	49	hsa-miR-934;NC_000013.11_28441;hsa-miR-30c-1-3p;NC_000023.11_36905;hsa-miR-92a-1-5p;hsa-miR-7974;NC_000003.12_7276;NC_000007.14_17821;hsa-miR-510-5p;hsa-miR-302a-5p;NC_000021.9_35751;NC_000003.12_8583;hsa-miR-18a-3p;NC_000010.11_23646;NC_000012.12_25887;hsa-miR-629-3p;hsa-miR-302c-5p;NC_000012.12_26286;NC_000006.12_15769;hsa-miR-17-5p;NC_000022.11_36372;hsa-miR-26a-1-3p;hsa-miR-7-5p;NC_000001.11_…
ABCC4	ENST00000261530	0.341837	4.66028e-68	48	hsa-miR-33b-3p;hsa-miR-372-5p;hsa-miR-30c-1-3p;NC_000008.11_19445;NC_000010.11_23303;NC_000005.10_12588;hsa-miR-92a-1-5p;hsa-miR-629-3p;NC_000003.12_7276;NC_000007.14_17821;hsa-miR-1298-5p;NC_000021.9_35751;NC_000010.11_23646;hsa-miR-18a-3p;NC_000012.12_25887;NC_000018.10_33742;NC_000004.12_9892;NC_000005.10_11919>NC_000005.10_11920;hsa-miR-302c-5p;hsa-miR-17-5p;NC_000013.11_27627;NC_000005.10_14…
VCPIP1	ENST00000261530	0.443878	5.68064e-68	45	hsa-miR-934;hsa-miR-33b-3p;hsa-miR-372-5p;hsa-miR-30c-1-3p;NC_000008.11_19445;hsa-miR-498;NC_000005.10_12588;hsa-miR-629-3p;NC_000012.12_25887;hsa-miR-18a-3p;NC_000011.10_25384;NC_000018.10_33742;NC_000005.10_11919>NC_000005.10_11920;NC_000004.12_9892;hsa-miR-302c-5p;hsa-miR-17-5p;hsa-miR-34c-5p;NC_000013.11_27627;hsa-miR-26a-1-3p;hsa-miR-1257;hsa-miR-7-5p;NC_000002.12_3238;NC_000003.12_7973;NC_0…
ZEB1	ENST00000261530	0.443878	5.68064e-68	45	hsa-miR-372-5p;NC_000013.11_28441;hsa-miR-30c-1-3p;NC_000008.11_19445;NC_000023.11_36905;hsa-miR-92a-1-5p;hsa-miR-629-3p;NC_000003.12_7276;hsa-miR-1298-5p;NC_000021.9_35751;NC_000012.12_25887;hsa-miR-18a-3p;NC_000011.10_25384;NC_000018.10_33742;NC_000004.12_9892;hsa-miR-302c-5p;hsa-miR-34c-5p;NC_000013.11_27627;hsa-miR-26a-1-3p;hsa-miR-7-5p;NC_000001.11_3101;NC_000002.12_3238;NC_000012.12_25503;h…
LYST	NONHSAT215932	0.663866	9.50711e-68	47	hsa-miR-934;hsa-miR-33b-3p;hsa-miR-372-5p;NC_000013.11_28441;hsa-miR-30c-1-3p;hsa-miR-498;NC_000010.11_23303;hsa-miR-92a-1-5p;hsa-miR-7974;hsa-miR-518e-5p>hsa-miR-519a-5p>hsa-miR-519b-5p>hsa-miR-519c-5p>hsa-miR-522-5p>hsa-miR-523-5p;NC_000007.14_17821;NC_000010.11_23646;NC_000021.9_35751;NC_000012.12_25887;NC_000011.10_25384;hsa-miR-302c-5p;NC_000012.12_26286;NC_000006.12_15769;hsa-miR-17-5p;hsa-…
NCKAP1	ENST00000281092	0.335	1.44634e-67	42	NC_000001.11_2008;hsa-miR-33b-3p;hsa-miR-372-5p;hsa-miR-30c-1-3p;NC_000008.11_19445;NC_000005.10_12588;hsa-miR-629-3p;NC_000012.12_25887;NC_000011.10_25384;NC_000004.12_9892;NC_000005.10_11919>NC_000005.10_11920;hsa-miR-302c-5p;NC_000012.12_26286;NC_000006.12_15769;hsa-miR-17-5p;hsa-miR-34c-5p;NC_000022.11_36372;hsa-miR-1257;hsa-miR-26a-1-3p;hsa-miR-7-5p;NC_000001.11_3101;NC_000008.11_20037*;NC_0…
HIVEP2	ENST00000281092	0.415	1.71721e-67	48	hsa-miR-934;hsa-miR-372-5p;hsa-miR-30c-1-3p;hsa-miR-498;NC_000008.11_19445;NC_000010.11_23303;hsa-miR-92a-1-5p;hsa-miR-1298-5p;hsa-miR-27b-5p;NC_000021.9_35751;NC_000012.12_25887;hsa-miR-18a-3p;NC_000011.10_25384;NC_000004.12_9892;hsa-miR-302c-5p;NC_000012.12_26286;NC_000006.12_15769;hsa-miR-17-5p;hsa-miR-34c-5p;NC_000013.11_27627;NC_000022.11_36372;NC_000005.10_14158;hsa-miR-26a-1-3p;hsa-miR-7-5…
UBR3	ENST00000263967	0.520548	1.7478e-67	42	hsa-miR-934;hsa-miR-33b-3p;hsa-miR-372-5p;NC_000013.11_28441;hsa-miR-30c-1-3p;hsa-miR-498;hsa-miR-92a-1-5p;hsa-miR-7974;hsa-miR-629-3p;NC_000012.12_25887;NC_000011.10_25384;NC_000018.10_33742;NC_000005.10_11919>NC_000005.10_11920;NC_000004.12_9892;hsa-miR-302c-5p;NC_000006.12_15769;hsa-miR-17-5p;NC_000013.11_27627;hsa-miR-1257;NC_000002.12_3238;NC_000011.10_25091;NC_000015.10_30316;hsa-miR-15b-3p…
RASGRP3	ENST00000261530	0.321429	2.24792e-67	43	hsa-miR-33b-3p;hsa-miR-25-5p;hsa-miR-372-5p;hsa-miR-498;NC_000008.11_19445;NC_000010.11_23303;NC_000003.12_7276;NC_000007.14_17821;hsa-miR-27b-5p;NC_000010.11_23646;NC_000012.12_25887;hsa-miR-18a-3p;NC_000011.10_25384;NC_000018.10_33742;hsa-miR-302c-5p;hsa-miR-17-5p;hsa-miR-34c-5p;NC_000013.11_27627;hsa-miR-1257;hsa-miR-26a-1-3p;hsa-miR-7-5p;NC_000002.12_3238;NC_000003.12_7973;NC_000012.12_25503;…
NCOA3	ENST00000281092	0.38	2.36531e-67	46	hsa-miR-33b-3p;NC_000006.12_14671;hsa-miR-372-5p;hsa-miR-30c-1-3p;NC_000008.11_19445;hsa-miR-498;NC_000010.11_23303;hsa-miR-675-5p;hsa-miR-92a-1-5p;NC_000005.10_12588;hsa-miR-629-3p;NC_000012.12_25887;hsa-miR-18a-3p;NC_000011.10_25384;NC_000004.12_9892;hsa-miR-302c-5p;NC_000012.12_26286;NC_000006.12_15769;hsa-miR-17-5p;NC_000022.11_36372;hsa-miR-26a-1-3p;NC_000001.11_3101;NC_000002.12_3238;NC_000…
LCOR	NR_038921	0.73	3.3983e-67	43	hsa-miR-25-5p;hsa-miR-372-5p;hsa-miR-30c-1-3p;NC_000008.11_19445;NC_000005.10_12588;hsa-miR-7974;hsa-miR-518e-5p>hsa-miR-519a-5p>hsa-miR-519b-5p>hsa-miR-519c-5p>hsa-miR-522-5p>hsa-miR-523-5p;NC_000007.14_17821;hsa-miR-27b-5p;hsa-miR-1298-5p;NC_000021.9_35751;NC_000012.12_25887;NC_000011.10_25384;NC_000004.12_9892;hsa-miR-302c-5p;NC_000012.12_26286;NC_000006.12_15769;hsa-miR-17-5p;NC_000013.11_276…
TTBK2	NR_033268	0.642202	4.01317e-67	47	hsa-miR-934;NC_000009.12_21574;hsa-miR-372-5p;hsa-miR-3155a;NC_000009.12_20733;hsa-miR-30c-1-3p;NC_000023.11_36905;NC_000010.11_23303;hsa-miR-371b-3p;hsa-miR-92a-1-5p;hsa-miR-518b;hsa-miR-7974;hsa-miR-518e-5p>hsa-miR-519a-5p>hsa-miR-519b-5p>hsa-miR-519c-5p>hsa-miR-522-5p>hsa-miR-523-5p;NC_000003.12_7276;NC_000007.14_17821;hsa-miR-510-5p;hsa-miR-302a-5p;NC_000003.12_8583;NC_000012.12_25887;hsa-miR…
SLC39A10	ENST00000263967	0.561644	4.31815e-67	45	hsa-miR-934;hsa-miR-33b-3p;hsa-miR-372-5p;NC_000013.11_28441;hsa-miR-30c-1-3p;hsa-miR-498;hsa-miR-371b-3p;hsa-miR-92a-1-5p;hsa-miR-7974;hsa-miR-3662;NC_000007.14_17821;NC_000012.12_25887;NC_000004.12_10500;NC_000011.10_25384;NC_000005.10_11919>NC_000005.10_11920;hsa-miR-302c-5p;NC_000006.12_15769;hsa-miR-17-5p;NC_000013.11_27627;NC_000022.11_36437;hsa-miR-26a-1-3p;NC_000002.12_3238;NC_000011.10_2…
CPEB4	ENST00000281092	0.45	8.68746e-67	46	hsa-miR-372-5p;hsa-miR-30c-1-3p;NC_000008.11_19445;hsa-miR-498;NC_000010.11_23303;hsa-miR-675-5p;hsa-miR-92a-1-5p;NC_000005.10_12588;hsa-miR-629-3p;hsa-miR-1298-5p;hsa-miR-27b-5p;NC_000012.12_25887;NC_000011.10_25384;hsa-miR-302c-5p;NC_000012.12_26286;NC_000006.12_15769;hsa-miR-34c-5p;NC_000013.11_27627;hsa-miR-26a-1-3p;hsa-miR-1257;NC_000002.12_3238;NC_000003.12_7973;NC_000012.12_25503;NC_000011…
ANK2	ENST00000263967	0.630137	9.05921e-67	49	hsa-miR-33b-3p;hsa-miR-372-5p;NC_000013.11_28441;hsa-miR-30c-1-3p;hsa-miR-371b-3p;hsa-miR-92a-1-5p;hsa-miR-7974;hsa-miR-629-3p;hsa-miR-3662;NC_000007.14_17821;NC_000010.11_23646;NC_000012.12_25887;NC_000004.12_10500;NC_000011.10_25384;NC_000018.10_33742;NC_000005.10_11919>NC_000005.10_11920;hsa-miR-302c-5p;NC_000006.12_15769;hsa-miR-17-5p;NC_000013.11_27627;NC_000022.11_36437;hsa-miR-1257;hsa-miR…
TTN	NR_038921	0.81	1.14058e-66	46	NC_000001.11_2008;hsa-miR-25-5p;hsa-miR-372-5p;NC_000013.11_28441;hsa-miR-30c-1-3p;hsa-miR-371b-3p;hsa-miR-7974;hsa-miR-3662;NC_000007.14_17821;hsa-miR-27b-5p;NC_000021.9_35751;NC_000012.12_25887;NC_000011.10_25384;NC_000005.10_11919>NC_000005.10_11920;NC_000004.12_9892;NC_000009.12_21255;hsa-miR-302c-5p;NC_000012.12_26286;NC_000006.12_15769;hsa-miR-17-5p;NC_000022.11_36372;hsa-miR-1257;hsa-miR-2…
MXD1	NR_033268	0.577982	1.17461e-66	46	hsa-miR-371a-5p;hsa-miR-3155a;NC_000013.11_28441;hsa-miR-30c-1-3p;NC_000009.12_20733;NC_000023.11_36905;NC_000010.11_23303;hsa-miR-371b-3p;hsa-miR-92a-1-5p;hsa-miR-7974;hsa-miR-518e-5p>hsa-miR-519a-5p>hsa-miR-519b-5p>hsa-miR-519c-5p>hsa-miR-522-5p>hsa-miR-523-5p;hsa-miR-629-3p;NC_000007.14_17821;hsa-miR-510-5p;hsa-miR-302a-5p;NC_000010.11_23646;NC_000012.12_25887;hsa-miR-302c-5p;hsa-miR-17-5p;NC_…
HIVEP2	NR_033268	0.559633	1.17846e-66	47	hsa-miR-934;hsa-miR-372-5p;hsa-miR-3155a;NC_000013.11_28441;NC_000009.12_20733;hsa-miR-30c-1-3p;NC_000023.11_36905;NC_000010.11_23303;hsa-miR-92a-1-5p;hsa-miR-7974;NC_000003.12_7276;NC_000007.14_17821;hsa-miR-1298-5p;NC_000021.9_35751;NC_000003.12_8583;hsa-miR-18a-3p;NC_000012.12_25887;hsa-miR-302c-5p;NC_000012.12_26286;hsa-miR-17-5p;NC_000006.12_15769;NC_000022.11_36372;NC_000005.10_14158;hsa-mi…
ASPH	ENST00000261530	0.331633	1.38819e-66	46	hsa-miR-934;hsa-miR-33b-3p;NC_000006.12_14671;hsa-miR-372-5p;hsa-miR-30c-1-3p;NC_000008.11_19445;hsa-miR-498;hsa-miR-92a-1-5p;hsa-miR-629-3p;NC_000010.11_23646;NC_000012.12_25887;NC_000018.10_33742;hsa-miR-17-5p;hsa-miR-34c-5p;NC_000006.12_15809;NC_000013.11_27627;NC_000022.11_36437;hsa-miR-1257;hsa-miR-26a-1-3p;hsa-miR-7-5p;NC_000001.11_3101;NC_000002.12_3238;NC_000012.12_25503;hsa-miR-519a-3p;N…
UBR3	NONHSAT215932	0.504202	2.17876e-66	41	hsa-miR-934;hsa-miR-33b-3p;hsa-miR-372-5p;NC_000013.11_28441;hsa-miR-30c-1-3p;hsa-miR-498;NC_000023.11_36905;NC_000010.11_23303;hsa-miR-92a-1-5p;hsa-miR-7974;NC_000012.12_25887;NC_000011.10_25384;NC_000005.10_11919>NC_000005.10_11920;hsa-miR-302c-5p;NC_000012.12_26286;NC_000006.12_15769;hsa-miR-17-5p;NC_000013.11_27627;hsa-miR-1257;NC_000002.12_3238;NC_000008.11_20037*;NC_000003.12_7973;NC_000011…
VCPIP1	ENST00000263967	0.445205	3.28409e-66	42	hsa-miR-934;hsa-miR-33b-3p;hsa-miR-372-5p;hsa-miR-30c-1-3p;hsa-miR-498;hsa-miR-7974;hsa-miR-629-3p;NC_000012.12_25887;NC_000011.10_25384;NC_000018.10_33742;NC_000005.10_11919>NC_000005.10_11920;NC_000004.12_9892;NC_000009.12_21255;hsa-miR-302c-5p;NC_000006.12_15769;hsa-miR-17-5p;NC_000013.11_27627;hsa-miR-26a-1-3p;hsa-miR-1257;hsa-miR-7-5p;NC_000002.12_3238;NC_000011.10_25091;NC_000015.10_30316;h…
DNAJC10	ENST00000281092	0.415	3.5404e-66	43	hsa-miR-934;NC_000006.12_14671;hsa-miR-372-5p;hsa-miR-30c-1-3p;NC_000008.11_19445;hsa-miR-498;NC_000005.10_12588;hsa-miR-92a-1-5p;hsa-miR-1298-5p;NC_000012.12_25887;hsa-miR-18a-3p;NC_000011.10_25384;NC_000004.12_9892;hsa-miR-302c-5p;NC_000006.12_15769;hsa-miR-17-5p;hsa-miR-34c-5p;NC_000013.11_27627;NC_000022.11_36372;NC_000005.10_14158;hsa-miR-1257;hsa-miR-26a-1-3p;hsa-miR-7-5p;NC_000003.12_7973;…
INHBA	ENST00000281092	0.38	3.5404e-66	43	hsa-miR-934;hsa-miR-33b-3p;hsa-miR-372-5p;hsa-miR-30c-1-3p;NC_000008.11_19445;hsa-miR-629-3p;hsa-miR-27b-5p;NC_000021.9_35751;NC_000012.12_25887;hsa-miR-18a-3p;NC_000004.12_9892;hsa-miR-302c-5p;NC_000012.12_26286;NC_000006.12_15769;hsa-miR-17-5p;NC_000013.11_27627;NC_000022.11_36372;hsa-miR-26a-1-3p;hsa-miR-1257;hsa-miR-7-5p;NC_000001.11_3101;NC_000008.11_20037*;NC_000002.12_3238;NC_000011.10_250…
MGEA5	NR_033268	0.559633	3.71849e-66	46	hsa-miR-934;NC_000009.12_21574;hsa-miR-371a-5p;hsa-miR-372-5p;NC_000013.11_28441;NC_000009.12_20733;hsa-miR-3155a;hsa-miR-371b-3p;hsa-miR-92a-1-5p;hsa-miR-7974;hsa-miR-518e-5p>hsa-miR-519a-5p>hsa-miR-519b-5p>hsa-miR-519c-5p>hsa-miR-522-5p>hsa-miR-523-5p;NC_000003.12_7276;NC_000007.14_17821;hsa-miR-510-5p;hsa-miR-302a-5p;NC_000003.12_8583;NC_000012.12_25887;hsa-miR-18a-3p;hsa-miR-629-3p;NC_000012.…
ATP2B4	ENST00000281092	0.365	4.17728e-66	48	NC_000001.11_2008;hsa-miR-934;NC_000006.12_14671;hsa-miR-372-5p;hsa-miR-30c-1-3p;hsa-miR-498;NC_000010.11_23303;hsa-miR-371b-3p;hsa-miR-675-5p;hsa-miR-92a-1-5p;NC_000005.10_12588;hsa-miR-629-3p;hsa-miR-27b-5p;NC_000021.9_35751;NC_000012.12_25887;hsa-miR-18a-3p;NC_000011.10_25384;NC_000004.12_9892;NC_000005.10_11919>NC_000005.10_11920;NC_000012.12_26286;NC_000006.12_15769;hsa-miR-17-5p;hsa-miR-34c…
HIVEP2	ENST00000261530	0.372449	4.92543e-66	48	hsa-miR-934;hsa-miR-372-5p;NC_000013.11_28441;hsa-miR-30c-1-3p;NC_000008.11_19445;NC_000023.11_36905;NC_000010.11_23303;hsa-miR-498;hsa-miR-92a-1-5p;NC_000003.12_7276;NC_000007.14_17821;hsa-miR-27b-5p;hsa-miR-1298-5p;NC_000021.9_35751;NC_000012.12_25887;hsa-miR-18a-3p;NC_000011.10_25384;NC_000004.12_9892;hsa-miR-302c-5p;hsa-miR-17-5p;hsa-miR-34c-5p;NC_000013.11_27627;NC_000005.10_14158;NC_000022.…
GALNT5	ENST00000263967	0.636986	5.95403e-66	47	hsa-miR-33b-3p;hsa-miR-372-5p;NC_000013.11_28441;hsa-miR-30c-1-3p;hsa-miR-371b-3p;hsa-miR-92a-1-5p;hsa-miR-629-3p;hsa-miR-3662;NC_000007.14_17821;NC_000010.11_23646;NC_000012.12_25887;NC_000004.12_10500;NC_000011.10_25384;NC_000018.10_33742;hsa-miR-302c-5p;NC_000006.12_15769;hsa-miR-17-5p;NC_000013.11_27627;hsa-miR-26a-1-3p;NC_000022.11_36437;hsa-miR-1257;hsa-miR-7-5p;NC_000002.12_3238;NC_000011.…
MLLT4	ENST00000281092	0.3	7.93222e-66	42	hsa-miR-934;hsa-miR-33b-3p;NC_000006.12_14671;hsa-miR-372-5p;hsa-miR-30c-1-3p;NC_000008.11_19445;hsa-miR-498;NC_000010.11_23303;NC_000005.10_12588;hsa-miR-92a-1-5p;hsa-miR-629-3p;NC_000012.12_25887;hsa-miR-18a-3p;NC_000011.10_25384;NC_000012.12_26286;NC_000006.12_15769;hsa-miR-34c-5p;NC_000013.11_27627;hsa-miR-26a-1-3p;hsa-miR-7-5p;NC_000002.12_3238;NC_000011.10_25091;hsa-miR-15b-3p;hsa-miR-3529-…
RALGPS2	ENST00000263967	0.582192	9.21456e-66	46	hsa-miR-934;hsa-miR-33b-3p;hsa-miR-372-5p;NC_000013.11_28441;hsa-miR-30c-1-3p;hsa-miR-92a-1-5p;hsa-miR-629-3p;hsa-miR-3662;NC_000007.14_17821;NC_000010.11_23646;NC_000012.12_25887;NC_000004.12_10500;NC_000011.10_25384;NC_000004.12_9892;hsa-miR-302c-5p;NC_000006.12_15769;NC_000013.11_27627;hsa-miR-26a-1-3p;hsa-miR-1257;NC_000022.11_36437;hsa-miR-7-5p;NC_000002.12_3238;hsa-miR-519a-3p;NC_000015.10_…
MTMR9	NR_038921	0.62	1.43379e-65	44	NC_000001.11_2008;hsa-miR-25-5p;hsa-miR-372-5p;NC_000013.11_28441;hsa-miR-30c-1-3p;NC_000008.11_19445;NC_000005.10_12588;hsa-miR-7974;hsa-miR-518e-5p>hsa-miR-519a-5p>hsa-miR-519b-5p>hsa-miR-519c-5p>hsa-miR-522-5p>hsa-miR-523-5p;hsa-miR-3662;hsa-miR-1298-5p;hsa-miR-27b-5p;NC_000021.9_35751;NC_000012.12_25887;NC_000011.10_25384;NC_000004.12_9892;NC_000009.12_21255;hsa-miR-302c-5p;NC_000012.12_26286…
MXD1	ENST00000263967	0.452055	1.65876e-65	44	hsa-miR-33b-3p;NC_000013.11_28441;hsa-miR-30c-1-3p;hsa-miR-371b-3p;hsa-miR-92a-1-5p;hsa-miR-7974;hsa-miR-629-3p;hsa-miR-3662;NC_000007.14_17821;NC_000010.11_23646;NC_000012.12_25887;NC_000004.12_10500;NC_000011.10_25384;NC_000005.10_11919>NC_000005.10_11920;NC_000009.12_21255;hsa-miR-302c-5p;NC_000006.12_15769;hsa-miR-17-5p;NC_000022.11_36437;hsa-miR-26a-1-3p;hsa-miR-1257;NC_000002.12_3238;NC_000…
ASPH	ENST00000281092	0.3	1.84815e-65	45	hsa-miR-934;hsa-miR-33b-3p;NC_000006.12_14671;hsa-miR-372-5p;hsa-miR-30c-1-3p;NC_000008.11_19445;hsa-miR-498;hsa-miR-92a-1-5p;hsa-miR-629-3p;NC_000012.12_25887;NC_000006.12_15769;hsa-miR-17-5p;hsa-miR-34c-5p;NC_000006.12_15809;NC_000013.11_27627;NC_000022.11_36372;hsa-miR-1257;hsa-miR-26a-1-3p;hsa-miR-7-5p;NC_000001.11_3101;NC_000002.12_3238;NC_000012.12_25503;NC_000011.10_25091;hsa-miR-15b-3p;hs…
CPEB4	ENST00000261530	0.403061	1.95354e-65	46	hsa-miR-25-5p;hsa-miR-372-5p;hsa-miR-30c-1-3p;NC_000008.11_19445;hsa-miR-498;NC_000010.11_23303;NC_000005.10_12588;hsa-miR-92a-1-5p;hsa-miR-629-3p;NC_000003.12_7276;hsa-miR-27b-5p;NC_000007.14_17821;hsa-miR-1298-5p;NC_000010.11_23646;NC_000012.12_25887;NC_000011.10_25384;hsa-miR-302c-5p;hsa-miR-34c-5p;NC_000013.11_27627;hsa-miR-26a-1-3p;hsa-miR-1257;NC_000002.12_3238;NC_000003.12_7973;NC_000012.1…
GRB10	NR_033268	0.633028	2.55422e-65	47	NC_000009.12_21574;hsa-miR-371a-5p;hsa-miR-372-5p;hsa-miR-3155a;hsa-miR-30c-1-3p;NC_000023.11_36905;NC_000010.11_23303;hsa-miR-92a-1-5p;hsa-miR-7974;hsa-miR-518e-5p>hsa-miR-519a-5p>hsa-miR-519b-5p>hsa-miR-519c-5p>hsa-miR-522-5p>hsa-miR-523-5p;hsa-miR-510-5p;NC_000010.11_23646;NC_000003.12_8583;NC_000012.12_25887;hsa-miR-18a-3p;hsa-miR-302c-5p;NC_000012.12_26286;NC_000006.12_15769;NC_000022.11_363…
DENND4A	NONHSAT215932	0.571429	3.0825e-65	43	hsa-miR-934;NC_000013.11_28441;hsa-miR-30c-1-3p;NC_000023.11_36905;NC_000010.11_23303;hsa-miR-518e-5p>hsa-miR-519a-5p>hsa-miR-519b-5p>hsa-miR-519c-5p>hsa-miR-522-5p>hsa-miR-523-5p;NC_000007.14_17821;NC_000010.11_23646;NC_000021.9_35751;NC_000012.12_25887;NC_000011.10_25384;NC_000005.10_11919>NC_000005.10_11920;NC_000012.12_26286;NC_000006.12_15769;hsa-miR-17-5p;hsa-miR-34c-5p;NC_000013.11_27627;h…
TNFSF15	NR_033268	0.522936	3.39472e-65	46	hsa-miR-934;hsa-miR-371a-5p;hsa-miR-372-5p;NC_000013.11_28441;NC_000009.12_20733;hsa-miR-30c-1-3p;NC_000023.11_36905;NC_000010.11_23303;hsa-miR-92a-1-5p;hsa-miR-7974;hsa-miR-629-3p;hsa-miR-1298-5p;hsa-miR-510-5p;NC_000010.11_23646;NC_000003.12_8583;hsa-miR-18a-3p;hsa-miR-302c-5p;NC_000012.12_26286;NC_000006.12_15769;hsa-miR-17-5p;NC_000022.11_36372;NC_000005.10_14158;hsa-miR-26a-1-3p;hsa-miR-7-5p…
HIPK2	ENST00000563635	0.878378	3.5664e-65	45	hsa-miR-934;hsa-miR-33b-3p;NC_000006.12_14671;hsa-miR-372-5p;NC_000013.11_28441;hsa-miR-3155a;NC_000008.11_19445;hsa-miR-498;NC_000005.10_12588;hsa-miR-518e-5p>hsa-miR-519a-5p>hsa-miR-519b-5p>hsa-miR-519c-5p>hsa-miR-522-5p>hsa-miR-523-5p;NC_000003.12_7276;hsa-miR-3662;NC_000007.14_17821;hsa-miR-302a-5p;NC_000021.9_35751;NC_000003.12_8583;hsa-miR-18a-3p;NC_000012.12_25887;NC_000011.10_25384;NC_000…
CPEB2	ENST00000281092	0.35	3.89831e-65	47	hsa-miR-934;hsa-miR-33b-3p;NC_000006.12_14671;hsa-miR-30c-1-3p;NC_000008.11_19445;hsa-miR-498;hsa-miR-371b-3p;hsa-miR-675-5p;hsa-miR-92a-1-5p;NC_000005.10_12588;hsa-miR-629-3p;hsa-miR-18a-3p;NC_000011.10_25384;NC_000004.12_9892;hsa-miR-302c-5p;hsa-miR-17-5p;hsa-miR-34c-5p;NC_000006.12_15809;NC_000022.11_36372;NC_000005.10_14158;hsa-miR-26a-1-3p;hsa-miR-7-5p;NC_000001.11_3101;NC_000002.12_3238;NC_…
ZNF704	NONHSAT215932	0.756303	6.4681e-65	45	hsa-miR-934;hsa-miR-33b-3p;NC_000013.11_28441;hsa-miR-30c-1-3p;NC_000023.11_36905;hsa-miR-92a-1-5p;hsa-miR-7974;NC_000007.14_17821;NC_000010.11_23646;NC_000021.9_35751;NC_000012.12_25887;NC_000011.10_25384;hsa-miR-302c-5p;NC_000012.12_26286;NC_000006.12_15769;hsa-miR-17-5p;hsa-miR-34c-5p;NC_000013.11_27627;hsa-miR-1257;hsa-miR-26a-1-3p;NC_000008.11_20037*;NC_000003.12_9133;NC_000003.12_7973;NC_00…
VTI1A	ENST00000563635	0.837838	6.89636e-65	45	hsa-miR-934;hsa-miR-33b-3p;NC_000006.12_14671;hsa-miR-372-5p;NC_000013.11_28441;hsa-miR-3155a;NC_000008.11_19445;hsa-miR-498;NC_000005.10_12588;NC_000003.12_8135;hsa-miR-518e-5p>hsa-miR-519a-5p>hsa-miR-519b-5p>hsa-miR-519c-5p>hsa-miR-522-5p>hsa-miR-523-5p;hsa-miR-3662;NC_000007.14_17821;hsa-miR-302a-5p;NC_000021.9_35751;NC_000003.12_8583;hsa-miR-18a-3p;NC_000012.12_25887;NC_000011.10_25384;NC_000…
VTI1A	NR_038921	0.74	8.04049e-65	47	hsa-miR-25-5p;hsa-miR-372-5p;NC_000013.11_28441;hsa-miR-30c-1-3p;NC_000008.11_19445;hsa-miR-371b-3p;NC_000005.10_12588;hsa-miR-7974;hsa-miR-518e-5p>hsa-miR-519a-5p>hsa-miR-519b-5p>hsa-miR-519c-5p>hsa-miR-522-5p>hsa-miR-523-5p;hsa-miR-3662;NC_000007.14_17821;NC_000021.9_35751;NC_000012.12_25887;NC_000011.10_25384;NC_000005.10_11919>NC_000005.10_11920;NC_000004.12_9892;hsa-miR-302c-5p;NC_000012.12_…
GALNT5	ENST00000281092	0.525	1.08942e-64	49	hsa-miR-33b-3p;NC_000006.12_14671;hsa-miR-372-5p;hsa-miR-30c-1-3p;NC_000008.11_19445;NC_000010.11_23303;hsa-miR-371b-3p;hsa-miR-92a-1-5p;hsa-miR-629-3p;hsa-miR-1298-5p;NC_000012.12_25887;hsa-miR-18a-3p;NC_000011.10_25384;hsa-miR-302c-5p;NC_000006.12_15769;hsa-miR-17-5p;hsa-miR-34c-5p;NC_000013.11_27627;NC_000022.11_36372;hsa-miR-1257;hsa-miR-26a-1-3p;hsa-miR-7-5p;NC_000001.11_3101;NC_000008.11_20…
LMO7	ENST00000261530	0.357143	1.19393e-64	48	NC_000001.11_2008;hsa-miR-934;hsa-miR-33b-3p;NC_000006.12_14671;NC_000013.11_28441;hsa-miR-30c-1-3p;NC_000008.11_19445;NC_000003.12_7276;NC_000007.14_17821;hsa-miR-27b-5p;NC_000010.11_23646;NC_000012.12_25887;hsa-miR-18a-3p;NC_000011.10_25384;NC_000018.10_33742;hsa-miR-302c-5p;hsa-miR-17-5p;hsa-miR-34c-5p;NC_000013.11_27627;NC_000022.11_36437;hsa-miR-1257;hsa-miR-26a-1-3p;hsa-miR-7-5p;NC_000001.1…
MAP3K2	NONHSAT224112	0.733333	1.38658e-64	43	hsa-miR-371a-5p;hsa-miR-372-5p;hsa-miR-3155a;NC_000013.11_28441;hsa-miR-498;NC_000010.11_23303;hsa-miR-92a-1-5p;hsa-miR-629-3p;hsa-miR-3662;NC_000007.14_17821;NC_000003.12_8583;NC_000012.12_25887;NC_000004.12_10500;NC_000006.12_15769;NC_000013.11_27627;NC_000022.11_36372;NC_000022.11_36437;hsa-miR-26a-1-3p;hsa-miR-7-5p;NC_000003.12_9133;hsa-miR-520a-3p;NC_000023.11_38289;hsa-miR-512-3p;hsa-miR-55…
CPPED1	ENST00000261530	0.270408	1.54793e-64	41	hsa-miR-30c-1-3p;hsa-miR-498;NC_000008.11_19445;NC_000023.11_36905;hsa-miR-629-3p;NC_000003.12_7276;hsa-miR-1298-5p;NC_000012.12_25887;hsa-miR-18a-3p;NC_000011.10_25384;NC_000005.10_11919>NC_000005.10_11920;NC_000004.12_9892;hsa-miR-17-5p;hsa-miR-34c-5p;NC_000013.11_27627;hsa-miR-1257;hsa-miR-26a-1-3p;hsa-miR-7-5p;NC_000003.12_7973;NC_000012.12_25503;hsa-miR-519a-3p;hsa-miR-3529-3p;hsa-miR-515-5p…
ATP2B4	ENST00000263967	0.417808	1.6298e-64	45	hsa-miR-934;hsa-miR-372-5p;NC_000013.11_28441;hsa-miR-30c-1-3p;hsa-miR-498;hsa-miR-371b-3p;hsa-miR-92a-1-5p;hsa-miR-7974;hsa-miR-629-3p;hsa-miR-3662;NC_000007.14_17821;NC_000010.11_23646;NC_000012.12_25887;NC_000004.12_10500;NC_000011.10_25384;NC_000018.10_33742;NC_000004.12_9892;NC_000005.10_11919>NC_000005.10_11920;NC_000009.12_21255;NC_000006.12_15769;hsa-miR-17-5p;NC_000013.11_27627;NC_000022…
MEF2A	ENST00000263967	0.5	1.6298e-64	45	hsa-miR-33b-3p;hsa-miR-372-5p;NC_000013.11_28441;hsa-miR-30c-1-3p;hsa-miR-498;hsa-miR-371b-3p;hsa-miR-92a-1-5p;hsa-miR-629-3p;hsa-miR-3662;NC_000007.14_17821;NC_000010.11_23646;NC_000012.12_25887;NC_000011.10_25384;NC_000004.12_9892;NC_000009.12_21255;hsa-miR-302c-5p;NC_000006.12_15769;hsa-miR-17-5p;NC_000013.11_27627;NC_000022.11_36437;hsa-miR-1257;hsa-miR-26a-1-3p;hsa-miR-7-5p;NC_000002.12_3238…
CPEB4	ENST00000263967	0.547945	1.96133e-64	43	hsa-miR-372-5p;hsa-miR-30c-1-3p;hsa-miR-498;hsa-miR-92a-1-5p;hsa-miR-7974;hsa-miR-629-3p;hsa-miR-3662;NC_000007.14_17821;NC_000010.11_23646;NC_000012.12_25887;NC_000011.10_25384;NC_000009.12_21255;hsa-miR-302c-5p;NC_000006.12_15769;NC_000013.11_27627;hsa-miR-26a-1-3p;hsa-miR-1257;NC_000002.12_3238;NC_000011.10_25091;hsa-miR-519a-3p;NC_000015.10_30316;hsa-miR-15b-3p;hsa-miR-302b-5p;hsa-miR-345-5p;…
NCOA7	ENST00000261530	0.382653	3.35481e-64	47	NC_000001.11_2008;hsa-miR-934;NC_000006.12_14671;hsa-miR-372-5p;NC_000013.11_28441;hsa-miR-30c-1-3p;NC_000008.11_19445;NC_000023.11_36905;NC_000010.11_23303;hsa-miR-371b-3p;hsa-miR-498;hsa-miR-92a-1-5p;hsa-miR-629-3p;hsa-miR-27b-5p;NC_000010.11_23646;NC_000012.12_25887;hsa-miR-18a-3p;NC_000011.10_25384;NC_000018.10_33742;NC_000004.12_9892;hsa-miR-302c-5p;hsa-miR-17-5p;NC_000013.11_27627;NC_000022…
NCOA3	NR_038921	0.62	4.25962e-64	42	hsa-miR-25-5p;hsa-miR-372-5p;NC_000013.11_28441;hsa-miR-30c-1-3p;NC_000008.11_19445;NC_000005.10_12588;hsa-miR-7974;hsa-miR-3662;NC_000007.14_17821;NC_000012.12_25887;NC_000011.10_25384;NC_000004.12_9892;NC_000009.12_21255;hsa-miR-302c-5p;NC_000012.12_26286;NC_000006.12_15769;hsa-miR-17-5p;NC_000022.11_36372;hsa-miR-26a-1-3p;NC_000001.11_3101;NC_000002.12_3238;NC_000003.12_7973;NC_000015.10_30316…
MEF2A	ENST00000237264	0.682353	5.90845e-64	44	hsa-miR-33b-3p;NC_000006.12_14671;NC_000013.11_28441;NC_000005.10_12140;NC_000008.11_19445;hsa-miR-675-5p;hsa-miR-92a-1-5p;hsa-miR-518e-5p>hsa-miR-519a-5p>hsa-miR-519b-5p>hsa-miR-519c-5p>hsa-miR-522-5p>hsa-miR-523-5p;hsa-miR-3662;hsa-miR-1298-5p;NC_000021.9_35751;NC_000012.12_25887;hsa-miR-18a-3p;NC_000011.10_25384;NC_000004.12_9892;hsa-miR-302c-5p;NC_000006.12_15769;NC_000013.11_27627;NC_000022.…
SLC39A10	NONHSAT215932	0.571429	6.61567e-64	43	hsa-miR-934;hsa-miR-33b-3p;hsa-miR-372-5p;NC_000013.11_28441;hsa-miR-30c-1-3p;hsa-miR-498;NC_000023.11_36905;NC_000010.11_23303;hsa-miR-92a-1-5p;hsa-miR-7974;hsa-miR-518e-5p>hsa-miR-519a-5p>hsa-miR-519b-5p>hsa-miR-519c-5p>hsa-miR-522-5p>hsa-miR-523-5p;NC_000007.14_17821;NC_000012.12_25887;NC_000011.10_25384;NC_000005.10_11919>NC_000005.10_11920;hsa-miR-302c-5p;NC_000012.12_26286;NC_000006.12_1576…
PPARA	ENST00000281092	0.44	8.41951e-64	47	hsa-miR-33b-3p;NC_000006.12_14671;hsa-miR-30c-1-3p;NC_000008.11_19445;NC_000010.11_23303;hsa-miR-92a-1-5p;hsa-miR-629-3p;hsa-miR-1298-5p;hsa-miR-27b-5p;NC_000021.9_35751;NC_000012.12_25887;hsa-miR-18a-3p;NC_000011.10_25384;NC_000005.10_11919>NC_000005.10_11920;hsa-miR-302c-5p;NC_000012.12_26286;NC_000006.12_15769;hsa-miR-17-5p;hsa-miR-34c-5p;NC_000013.11_27627;NC_000005.10_14158;hsa-miR-1257;hsa-…
TMEM181	ENST00000281092	0.315	9.17237e-64	40	hsa-miR-1323;hsa-miR-372-5p;hsa-miR-30c-1-3p;NC_000008.11_19445;hsa-miR-92a-1-5p;hsa-miR-629-3p;hsa-miR-1298-5p;NC_000012.12_25887;hsa-miR-18a-3p;NC_000004.12_9892;hsa-miR-302c-5p;NC_000006.12_15769;hsa-miR-17-5p;hsa-miR-34c-5p;NC_000013.11_27627;NC_000022.11_36372;hsa-miR-1257;hsa-miR-7-5p;NC_000002.12_3238;NC_000003.12_7973;NC_000012.12_25503;hsa-miR-15b-3p;hsa-miR-345-5p;hsa-miR-515-5p;NC_0000…
KLHL28	ENST00000261530	0.352041	1.19811e-63	41	hsa-miR-934;NC_000006.12_14671;hsa-miR-25-5p;hsa-miR-372-5p;hsa-miR-30c-1-3p;NC_000008.11_19445;NC_000023.11_36905;hsa-miR-498;NC_000005.10_12588;hsa-miR-629-3p;NC_000021.9_35751;NC_000012.12_25887;NC_000011.10_25384;NC_000004.12_9892;hsa-miR-302c-5p;hsa-miR-17-5p;hsa-miR-1257;hsa-miR-7-5p;NC_000002.12_3238;NC_000003.12_7973;NC_000015.10_30316;hsa-miR-3529-3p;hsa-miR-515-5p;NC_000020.11_35116;NC_…
NCKAP1	ENST00000261530	0.326531	1.19811e-63	41	NC_000001.11_2008;hsa-miR-33b-3p;hsa-miR-372-5p;hsa-miR-30c-1-3p;NC_000008.11_19445;NC_000023.11_36905;NC_000005.10_12588;hsa-miR-629-3p;NC_000007.14_17821;NC_000012.12_25887;NC_000011.10_25384;NC_000004.12_9892;NC_000005.10_11919>NC_000005.10_11920;hsa-miR-302c-5p;hsa-miR-17-5p;hsa-miR-34c-5p;hsa-miR-26a-1-3p;hsa-miR-1257;hsa-miR-7-5p;NC_000001.11_3101;NC_000002.12_3238;NC_000003.12_7973;hsa-miR…
DENND4A	ENST00000263967	0.458904	1.74424e-63	43	hsa-miR-934;NC_000013.11_28441;hsa-miR-30c-1-3p;hsa-miR-371b-3p;hsa-miR-629-3p;hsa-miR-3662;NC_000007.14_17821;NC_000010.11_23646;NC_000012.12_25887;NC_000011.10_25384;NC_000004.12_9892;NC_000005.10_11919>NC_000005.10_11920;NC_000009.12_21255;NC_000006.12_15769;hsa-miR-17-5p;NC_000013.11_27627;hsa-miR-26a-1-3p;hsa-miR-1257;hsa-miR-7-5p;NC_000002.12_3238;NC_000011.10_25091;hsa-miR-519a-3p;NC_00001…
KDM7A	ENST00000263967	0.513699	1.74424e-63	43	hsa-miR-934;hsa-miR-498;hsa-miR-92a-1-5p;hsa-miR-629-3p;hsa-miR-3662;NC_000007.14_17821;NC_000010.11_23646;NC_000012.12_25887;NC_000004.12_10500;NC_000011.10_25384;NC_000018.10_33742;NC_000004.12_9892;NC_000005.10_11919>NC_000005.10_11920;NC_000009.12_21255;hsa-miR-302c-5p;NC_000006.12_15769;hsa-miR-17-5p;hsa-miR-26a-1-3p;hsa-miR-7-5p;NC_000002.12_3238;NC_000015.10_30316;hsa-miR-15b-3p;hsa-miR-34…
HIVEP2	ENST00000263967	0.417808	2.59828e-63	44	hsa-miR-934;hsa-miR-372-5p;NC_000013.11_28441;hsa-miR-30c-1-3p;hsa-miR-498;hsa-miR-92a-1-5p;hsa-miR-7974;hsa-miR-3662;NC_000007.14_17821;NC_000012.12_25887;NC_000004.12_10500;NC_000011.10_25384;NC_000004.12_9892;NC_000009.12_21255;hsa-miR-302c-5p;NC_000006.12_15769;hsa-miR-17-5p;NC_000013.11_27627;NC_000022.11_36437;hsa-miR-26a-1-3p;hsa-miR-7-5p;NC_000002.12_3238;NC_000011.10_25091;NC_000015.10_3…
DMXL2	ENST00000281092	0.445	3.73747e-63	41	hsa-miR-33b-3p;hsa-miR-372-5p;hsa-miR-30c-1-3p;NC_000008.11_19445;hsa-miR-498;NC_000010.11_23303;NC_000012.12_25887;NC_000011.10_25384;NC_000005.10_11919>NC_000005.10_11920;hsa-miR-302c-5p;NC_000012.12_26286;NC_000006.12_15769;hsa-miR-17-5p;hsa-miR-34c-5p;NC_000006.12_15809;NC_000013.11_27627;hsa-miR-1257;hsa-miR-26a-1-3p;NC_000008.11_20037*;NC_000012.12_25503;NC_000011.10_25091;hsa-miR-345-5p;hs…
PPARA	NR_033268	0.623853	5.35122e-63	46	hsa-miR-371a-5p;hsa-miR-3155a;NC_000013.11_28441;hsa-miR-30c-1-3p;NC_000023.11_36905;NC_000010.11_23303;hsa-miR-92a-1-5p;hsa-miR-7974;hsa-miR-518e-5p>hsa-miR-519a-5p>hsa-miR-519b-5p>hsa-miR-519c-5p>hsa-miR-522-5p>hsa-miR-523-5p;NC_000003.12_7276;hsa-miR-1298-5p;hsa-miR-510-5p;NC_000010.11_23646;NC_000021.9_35751;NC_000003.12_8583;hsa-miR-18a-3p;NC_000012.12_25887;hsa-miR-629-3p;hsa-miR-302c-5p;NC…
LCOR	ENST00000263967	0.534247	6.4606e-63	42	hsa-miR-934;hsa-miR-372-5p;hsa-miR-30c-1-3p;hsa-miR-7974;hsa-miR-629-3p;NC_000007.14_17821;NC_000012.12_25887;NC_000011.10_25384;NC_000018.10_33742;NC_000004.12_9892;hsa-miR-302c-5p;NC_000006.12_15769;hsa-miR-17-5p;NC_000013.11_27627;hsa-miR-26a-1-3p;hsa-miR-1257;hsa-miR-7-5p;NC_000011.10_25091;hsa-miR-519a-3p;NC_000015.10_30316;hsa-miR-15b-3p;hsa-miR-345-5p;NC_000003.12_7520;NC_000020.11_35116;N…
RALGPS2	NR_038921	0.69	7.81121e-63	44	hsa-miR-25-5p;hsa-miR-372-5p;NC_000013.11_28441;hsa-miR-30c-1-3p;NC_000008.11_19445;hsa-miR-518e-5p>hsa-miR-519a-5p>hsa-miR-519b-5p>hsa-miR-519c-5p>hsa-miR-522-5p>hsa-miR-523-5p;hsa-miR-3662;hsa-miR-27b-5p;NC_000007.14_17821;hsa-miR-1298-5p;NC_000012.12_25887;NC_000011.10_25384;NC_000004.12_9892;hsa-miR-302c-5p;NC_000006.12_15769;NC_000006.12_15809;NC_000013.11_27627;NC_000022.11_36372;hsa-miR-12…
RALGPS2	ENST00000237264	0.752941	7.81121e-63	44	hsa-miR-33b-3p;NC_000006.12_14671;NC_000013.11_28441;NC_000005.10_12140;NC_000008.11_19445;hsa-miR-92a-1-5p;hsa-miR-518e-5p>hsa-miR-519a-5p>hsa-miR-519b-5p>hsa-miR-519c-5p>hsa-miR-522-5p>hsa-miR-523-5p;hsa-miR-3662;hsa-miR-1298-5p;hsa-miR-27b-5p;NC_000012.12_25887;hsa-miR-18a-3p;NC_000011.10_25384;NC_000004.12_9892;hsa-miR-302c-5p;NC_000006.12_15769;hsa-miR-34c-5p;NC_000006.12_15809;NC_000013.11_…
ADAM20	ENST00000263967	0.650685	1.28449e-62	45	hsa-miR-934;hsa-miR-33b-3p;hsa-miR-372-5p;NC_000013.11_28441;hsa-miR-30c-1-3p;hsa-miR-371b-3p;hsa-miR-92a-1-5p;hsa-miR-7974;hsa-miR-3662;NC_000007.14_17821;NC_000010.11_23646;NC_000012.12_25887;NC_000004.12_10500;NC_000011.10_25384;NC_000005.10_11919>NC_000005.10_11920;NC_000009.12_21255;hsa-miR-302c-5p;NC_000006.12_15769;NC_000022.11_36437;hsa-miR-26a-1-3p;hsa-miR-1257;hsa-miR-7-5p;NC_000002.12_…
HIPK2	ENST00000568777	0.840909	1.38883e-62	44	hsa-miR-934;hsa-miR-33b-3p;hsa-miR-372-5p;NC_000013.11_28441;hsa-miR-30c-1-3p;hsa-miR-371b-3p;hsa-miR-675-5p;hsa-miR-92a-1-5p;NC_000005.10_12588;hsa-miR-518e-5p>hsa-miR-519a-5p>hsa-miR-519b-5p>hsa-miR-519c-5p>hsa-miR-522-5p>hsa-miR-523-5p;NC_000003.12_7276;NC_000010.11_23646;NC_000003.12_8583;NC_000012.12_25887;hsa-miR-18a-3p;NC_000004.12_9892;hsa-miR-302c-5p;NC_000006.12_15769;hsa-miR-34c-5p;hsa…
CHD9	ENST00000263967	0.493151	1.80688e-62	41	hsa-miR-934;hsa-miR-30c-1-3p;hsa-miR-498;hsa-miR-92a-1-5p;hsa-miR-7974;hsa-miR-629-3p;NC_000007.14_17821;NC_000012.12_25887;NC_000011.10_25384;NC_000005.10_11919>NC_000005.10_11920;NC_000004.12_9892;hsa-miR-302c-5p;NC_000006.12_15769;hsa-miR-17-5p;NC_000013.11_27627;hsa-miR-26a-1-3p;hsa-miR-1257;hsa-miR-7-5p;NC_000002.12_3238;NC_000011.10_25091;hsa-miR-519a-3p;NC_000015.10_30316;hsa-miR-15b-3p;hs…
NCOA3	ENST00000263967	0.458904	1.98963e-62	42	hsa-miR-33b-3p;hsa-miR-372-5p;NC_000013.11_28441;hsa-miR-30c-1-3p;hsa-miR-498;hsa-miR-92a-1-5p;hsa-miR-7974;hsa-miR-629-3p;hsa-miR-3662;NC_000007.14_17821;NC_000010.11_23646;NC_000012.12_25887;NC_000011.10_25384;NC_000018.10_33742;NC_000004.12_9892;NC_000009.12_21255;hsa-miR-302c-5p;NC_000006.12_15769;hsa-miR-17-5p;NC_000022.11_36437;hsa-miR-26a-1-3p;NC_000002.12_3238;hsa-miR-519a-3p;NC_000015.10…
VTI1A	ENST00000237264	0.835294	1.99998e-62	46	hsa-miR-33b-3p;NC_000006.12_14671;NC_000013.11_28441;NC_000005.10_12140;NC_000008.11_19445;NC_000005.10_12588;hsa-miR-675-5p;hsa-miR-92a-1-5p;hsa-miR-7974;hsa-miR-518e-5p>hsa-miR-519a-5p>hsa-miR-519b-5p>hsa-miR-519c-5p>hsa-miR-522-5p>hsa-miR-523-5p;hsa-miR-3662;hsa-miR-510-5p;NC_000021.9_35751;NC_000012.12_25887;hsa-miR-18a-3p;NC_000011.10_25384;NC_000005.10_11919>NC_000005.10_11920;NC_000004.12_…
INHBA	ENST00000261530	0.346939	2.05564e-62	42	hsa-miR-934;hsa-miR-33b-3p;hsa-miR-372-5p;NC_000013.11_28441;hsa-miR-30c-1-3p;NC_000008.11_19445;hsa-miR-629-3p;NC_000003.12_7276;NC_000007.14_17821;hsa-miR-27b-5p;NC_000021.9_35751;NC_000012.12_25887;hsa-miR-18a-3p;NC_000004.12_9892;hsa-miR-302c-5p;hsa-miR-17-5p;NC_000013.11_27627;hsa-miR-26a-1-3p;hsa-miR-1257;hsa-miR-7-5p;NC_000001.11_3101;NC_000002.12_3238;hsa-miR-519a-3p;hsa-miR-345-5p;hsa-mi…
PPARA	ENST00000261530	0.433673	2.11519e-62	47	hsa-miR-33b-3p;NC_000006.12_14671;NC_000013.11_28441;hsa-miR-30c-1-3p;NC_000008.11_19445;NC_000023.11_36905;NC_000010.11_23303;hsa-miR-92a-1-5p;hsa-miR-629-3p;NC_000003.12_7276;hsa-miR-1298-5p;hsa-miR-27b-5p;NC_000021.9_35751;NC_000010.11_23646;hsa-miR-18a-3p;NC_000012.12_25887;NC_000011.10_25384;NC_000005.10_11919>NC_000005.10_11920;hsa-miR-302c-5p;hsa-miR-17-5p;hsa-miR-34c-5p;NC_000013.11_27627…
LYST	ENST00000563635	0.756757	2.19817e-62	43	hsa-miR-934;hsa-miR-33b-3p;NC_000006.12_14671;hsa-miR-372-5p;NC_000013.11_28441;NC_000008.11_19445;hsa-miR-498;NC_000005.10_12588;hsa-miR-518e-5p>hsa-miR-519a-5p>hsa-miR-519b-5p>hsa-miR-519c-5p>hsa-miR-522-5p>hsa-miR-523-5p;hsa-miR-3662;NC_000007.14_17821;NC_000021.9_35751;NC_000003.12_8583;NC_000012.12_25887;NC_000011.10_25384;hsa-miR-302c-5p;NC_000006.12_15769;hsa-miR-17-5p;NC_000022.11_36372;N…
MAP2	ENST00000237264	0.611765	4.00706e-62	44	hsa-miR-33b-3p;NC_000013.11_28441;NC_000008.11_19445;hsa-miR-7974;hsa-miR-518e-5p>hsa-miR-519a-5p>hsa-miR-519b-5p>hsa-miR-519c-5p>hsa-miR-522-5p>hsa-miR-523-5p;hsa-miR-3662;hsa-miR-510-5p;hsa-miR-1298-5p;NC_000021.9_35751;hsa-miR-27b-5p;NC_000012.12_25887;NC_000011.10_25384;NC_000005.10_11919>NC_000005.10_11920;hsa-miR-302c-5p;NC_000006.12_15769;hsa-miR-34c-5p;NC_000006.12_15809;NC_000013.11_2762…
LMO7	ENST00000263967	0.465753	4.07644e-62	44	hsa-miR-934;hsa-miR-33b-3p;NC_000013.11_28441;hsa-miR-30c-1-3p;hsa-miR-7974;hsa-miR-3662;NC_000007.14_17821;NC_000010.11_23646;NC_000012.12_25887;NC_000004.12_10500;NC_000011.10_25384;NC_000018.10_33742;NC_000009.12_21255;hsa-miR-302c-5p;NC_000006.12_15769;hsa-miR-17-5p;NC_000013.11_27627;NC_000022.11_36437;hsa-miR-26a-1-3p;hsa-miR-1257;hsa-miR-7-5p;NC_000002.12_3238;NC_000011.10_25091;hsa-miR-51…
LCOR	NONHSAT215932	0.705882	4.86241e-62	41	hsa-miR-934;hsa-miR-372-5p;hsa-miR-30c-1-3p;NC_000023.11_36905;NC_000010.11_23303;hsa-miR-7974;hsa-miR-518e-5p>hsa-miR-519a-5p>hsa-miR-519b-5p>hsa-miR-519c-5p>hsa-miR-522-5p>hsa-miR-523-5p;NC_000007.14_17821;NC_000021.9_35751;NC_000012.12_25887;NC_000011.10_25384;hsa-miR-302c-5p;NC_000012.12_26286;NC_000006.12_15769;hsa-miR-17-5p;hsa-miR-34c-5p;NC_000013.11_27627;hsa-miR-1257;hsa-miR-26a-1-3p;NC_…
NR5A2	ENST00000261530	0.316327	4.91293e-62	41	hsa-miR-372-5p;NC_000013.11_28441;NC_000008.11_19445;NC_000023.11_36905;NC_000010.11_23303;hsa-miR-629-3p;NC_000007.14_17821;hsa-miR-27b-5p;NC_000012.12_25887;NC_000011.10_25384;NC_000018.10_33742;NC_000005.10_11919>NC_000005.10_11920;NC_000004.12_9892;hsa-miR-302c-5p;hsa-miR-34c-5p;NC_000005.10_14158;hsa-miR-1257;NC_000002.12_3238;NC_000003.12_7973;NC_000012.12_25503;hsa-miR-345-5p;hsa-miR-3529-…
MLLT4	ENST00000261530	0.30102	4.91293e-62	41	hsa-miR-934;hsa-miR-33b-3p;NC_000006.12_14671;hsa-miR-25-5p;hsa-miR-372-5p;NC_000013.11_28441;hsa-miR-30c-1-3p;NC_000008.11_19445;NC_000023.11_36905;NC_000010.11_23303;hsa-miR-498;hsa-miR-92a-1-5p;NC_000005.10_12588;hsa-miR-629-3p;NC_000007.14_17821;NC_000012.12_25887;hsa-miR-18a-3p;NC_000011.10_25384;NC_000018.10_33742;hsa-miR-34c-5p;NC_000013.11_27627;hsa-miR-26a-1-3p;hsa-miR-7-5p;NC_000002.12_…
DMXL2	ENST00000261530	0.423469	4.91293e-62	41	hsa-miR-33b-3p;hsa-miR-372-5p;hsa-miR-30c-1-3p;NC_000008.11_19445;NC_000023.11_36905;NC_000010.11_23303;hsa-miR-498;NC_000003.12_7276;NC_000012.12_25887;NC_000011.10_25384;NC_000018.10_33742;NC_000005.10_11919>NC_000005.10_11920;hsa-miR-302c-5p;hsa-miR-17-5p;hsa-miR-34c-5p;NC_000006.12_15809;NC_000013.11_27627;hsa-miR-1257;hsa-miR-26a-1-3p;NC_000012.12_25503;NC_000015.10_30316;hsa-miR-345-5p;hsa-…
MAP3K2	ENST00000281092	0.51	5.84938e-62	46	hsa-miR-934;hsa-miR-33b-3p;hsa-miR-372-5p;hsa-miR-30c-1-3p;hsa-miR-498;NC_000010.11_23303;hsa-miR-371b-3p;hsa-miR-92a-1-5p;hsa-miR-629-3p;hsa-miR-1298-5p;NC_000012.12_25887;NC_000011.10_25384;hsa-miR-302c-5p;NC_000012.12_26286;NC_000006.12_15769;hsa-miR-17-5p;hsa-miR-34c-5p;NC_000013.11_27627;NC_000022.11_36372;hsa-miR-1257;hsa-miR-26a-1-3p;hsa-miR-7-5p;NC_000001.11_3101;NC_000002.12_3238;NC_0000…
METTL15	ENST00000281092	0.37	6.91451e-62	39	hsa-miR-33b-3p;hsa-miR-372-5p;NC_000010.11_23303;hsa-miR-629-3p;NC_000012.12_25887;NC_000021.9_35751;hsa-miR-18a-3p;NC_000011.10_25384;NC_000004.12_9892;NC_000005.10_11919>NC_000005.10_11920;hsa-miR-302c-5p;NC_000012.12_26286;NC_000006.12_15769;hsa-miR-17-5p;hsa-miR-34c-5p;NC_000013.11_27627;NC_000022.11_36372;NC_000005.10_14158;hsa-miR-1257;hsa-miR-7-5p;NC_000008.11_20037*;NC_000012.12_25503;hsa…
SLC45A4	NR_033268	0.559633	7.13468e-62	44	NC_000009.12_21574;hsa-miR-371a-5p;hsa-miR-3155a;NC_000013.11_28441;hsa-miR-30c-1-3p;NC_000023.11_36905;hsa-miR-371b-3p;hsa-miR-92a-1-5p;hsa-miR-7974;hsa-miR-518e-5p>hsa-miR-519a-5p>hsa-miR-519b-5p>hsa-miR-519c-5p>hsa-miR-522-5p>hsa-miR-523-5p;NC_000007.14_17821;hsa-miR-510-5p;hsa-miR-1298-5p;NC_000012.12_25887;NC_000003.12_8583;hsa-miR-18a-3p;NC_000004.12_9958;hsa-miR-302c-5p;NC_000006.12_15769;…
ANK2	ENST00000237264	0.658824	7.53402e-62	46	hsa-miR-33b-3p;NC_000006.12_14671;NC_000013.11_28441;NC_000005.10_12140;NC_000008.11_19445;hsa-miR-675-5p;hsa-miR-92a-1-5p;hsa-miR-7974;hsa-miR-518e-5p>hsa-miR-519a-5p>hsa-miR-519b-5p>hsa-miR-519c-5p>hsa-miR-522-5p>hsa-miR-523-5p;hsa-miR-3662;hsa-miR-510-5p;hsa-miR-1298-5p;NC_000021.9_35751;hsa-miR-27b-5p;NC_000012.12_25887;NC_000011.10_25384;NC_000005.10_11919>NC_000005.10_11920;hsa-miR-302c-5p;…
ANK2	NR_038921	0.72	7.53402e-62	46	hsa-miR-25-5p;hsa-miR-372-5p;NC_000013.11_28441;hsa-miR-30c-1-3p;NC_000008.11_19445;hsa-miR-371b-3p;hsa-miR-7974;hsa-miR-518e-5p>hsa-miR-519a-5p>hsa-miR-519b-5p>hsa-miR-519c-5p>hsa-miR-522-5p>hsa-miR-523-5p;hsa-miR-3662;hsa-miR-27b-5p;NC_000007.14_17821;NC_000021.9_35751;hsa-miR-1298-5p;NC_000012.12_25887;NC_000011.10_25384;NC_000005.10_11919>NC_000005.10_11920;hsa-miR-302c-5p;NC_000012.12_26286;…
ABCC4	NR_038921	0.6	7.53544e-62	42	hsa-miR-372-5p;hsa-miR-30c-1-3p;NC_000008.11_19445;NC_000005.10_12588;hsa-miR-7974;hsa-miR-3662;NC_000007.14_17821;hsa-miR-1298-5p;NC_000021.9_35751;NC_000012.12_25887;NC_000005.10_11919>NC_000005.10_11920;NC_000004.12_9892;hsa-miR-302c-5p;NC_000012.12_26286;NC_000006.12_15769;hsa-miR-17-5p;NC_000013.11_27627;NC_000022.11_36372;hsa-miR-1257;NC_000002.12_3238;NC_000003.12_7973;hsa-miR-512-3p;hsa-m…
EGFR	ENST00000281092	0.315	1.25861e-61	42	NC_000001.11_2008;NC_000006.12_14671;hsa-miR-372-5p;NC_000008.11_19445;hsa-miR-371b-3p;hsa-miR-92a-1-5p;hsa-miR-629-3p;hsa-miR-1298-5p;NC_000012.12_25887;NC_000011.10_25384;NC_000012.12_26286;NC_000006.12_15769;hsa-miR-17-5p;hsa-miR-34c-5p;NC_000013.11_27627;NC_000005.10_14158;hsa-miR-26a-1-3p;hsa-miR-7-5p;NC_000002.12_3238;NC_000003.12_7973;NC_000012.12_25503;NC_000011.10_25091;hsa-miR-15b-3p;hs…
CHD9	NONHSAT215932	0.554622	1.75293e-61	40	hsa-miR-934;hsa-miR-30c-1-3p;hsa-miR-498;NC_000010.11_23303;hsa-miR-92a-1-5p;hsa-miR-7974;NC_000007.14_17821;NC_000021.9_35751;NC_000012.12_25887;NC_000011.10_25384;NC_000005.10_11919>NC_000005.10_11920;hsa-miR-302c-5p;NC_000012.12_26286;NC_000006.12_15769;hsa-miR-17-5p;NC_000013.11_27627;hsa-miR-26a-1-3p;hsa-miR-1257;NC_000002.12_3238;NC_000008.11_20037*;NC_000003.12_7973;NC_000011.10_25091;hsa-…
TNFSF15	ENST00000281092	0.355	1.94978e-61	45	hsa-miR-934;NC_000006.12_14671;hsa-miR-372-5p;NC_000011.10_24389*;hsa-miR-30c-1-3p;NC_000008.11_19445;NC_000010.11_23303;hsa-miR-92a-1-5p;hsa-miR-629-3p;hsa-miR-1298-5p;hsa-miR-18a-3p;NC_000011.10_25384;NC_000004.12_9892;hsa-miR-302c-5p;NC_000012.12_26286;NC_000006.12_15769;hsa-miR-17-5p;hsa-miR-34c-5p;NC_000006.12_15809;NC_000022.11_36372;NC_000005.10_14158;hsa-miR-1257;hsa-miR-26a-1-3p;hsa-miR-…
NCOA7	ENST00000263967	0.424658	2.53488e-61	43	hsa-miR-934;hsa-miR-372-5p;NC_000013.11_28441;hsa-miR-30c-1-3p;hsa-miR-498;hsa-miR-371b-3p;hsa-miR-92a-1-5p;hsa-miR-629-3p;hsa-miR-3662;NC_000010.11_23646;NC_000012.12_25887;NC_000004.12_10500;NC_000011.10_25384;NC_000018.10_33742;NC_000004.12_9892;hsa-miR-302c-5p;NC_000006.12_15769;hsa-miR-17-5p;NC_000013.11_27627;hsa-miR-26a-1-3p;NC_000022.11_36437;hsa-miR-7-5p;NC_000002.12_3238;hsa-miR-519a-3p…
ZNF160	ENST00000281092	0.275	5.12626e-61	39	NC_000006.12_14671;hsa-miR-372-5p;hsa-miR-30c-1-3p;NC_000008.11_19445;hsa-miR-498;NC_000010.11_23303;hsa-miR-629-3p;NC_000012.12_25887;hsa-miR-18a-3p;NC_000011.10_25384;NC_000004.12_9892;NC_000012.12_26286;hsa-miR-17-5p;NC_000022.11_36372;hsa-miR-26a-1-3p;NC_000005.10_14158;hsa-miR-7-5p;NC_000001.11_3101;NC_000008.11_20037*;NC_000003.12_7973;hsa-miR-345-5p;hsa-miR-3529-3p;NC_000016.10_31157;NC_00…
NCOA7	ENST00000281092	0.39	5.40853e-61	45	NC_000001.11_2008;hsa-miR-934;NC_000006.12_14671;hsa-miR-372-5p;hsa-miR-30c-1-3p;NC_000008.11_19445;hsa-miR-498;NC_000010.11_23303;hsa-miR-371b-3p;hsa-miR-92a-1-5p;hsa-miR-629-3p;hsa-miR-27b-5p;NC_000012.12_25887;hsa-miR-18a-3p;NC_000011.10_25384;NC_000004.12_9892;hsa-miR-302c-5p;NC_000012.12_26286;NC_000006.12_15769;hsa-miR-17-5p;NC_000013.11_27627;NC_000022.11_36372;hsa-miR-26a-1-3p;hsa-miR-7-5…
FRAS1	NR_033268	0.587156	5.90088e-61	43	hsa-miR-934;hsa-miR-371a-5p;hsa-miR-372-5p;hsa-miR-3155a;NC_000013.11_28441;NC_000009.12_20733;NC_000023.11_36905;NC_000010.11_23303;hsa-miR-371b-3p;hsa-miR-92a-1-5p;hsa-miR-7974;NC_000003.12_7276;NC_000007.14_17821;hsa-miR-302a-5p;hsa-miR-510-5p;NC_000021.9_35751;hsa-miR-1298-5p;NC_000010.11_23646;NC_000003.12_8583;NC_000012.12_26286;hsa-miR-7-5p;NC_000001.11_3101;NC_000002.12_3238;NC_000003.12_…
HIPK2	NONHSAT224112	0.76	6.33609e-61	44	hsa-miR-371a-5p;hsa-miR-372-5p;hsa-miR-3155a;NC_000013.11_28441;NC_000008.11_19445;hsa-miR-498;NC_000010.11_23303;hsa-miR-92a-1-5p;hsa-miR-3662;NC_000007.14_17821;NC_000003.12_8583;NC_000012.12_25887;hsa-miR-18a-3p;NC_000004.12_10500;NC_000006.12_15769;NC_000013.11_27627;NC_000022.11_36372;NC_000022.11_36437;hsa-miR-26a-1-3p;hsa-miR-7-5p;NC_000003.12_9133;hsa-miR-520a-3p;hsa-miR-512-3p;hsa-miR-34…
VCPIP1	ENST00000432045	0.6875	9.09762e-61	36	hsa-miR-372-5p;hsa-miR-30c-1-3p;NC_000008.11_19445;hsa-miR-498;hsa-miR-629-3p;NC_000012.12_25887;hsa-miR-18a-3p;NC_000011.10_25384;NC_000004.12_9892;NC_000009.12_21255;NC_000006.12_15769;hsa-miR-17-5p;hsa-miR-34c-5p;NC_000022.11_36372;hsa-miR-26a-1-3p;hsa-miR-1257;hsa-miR-7-5p;NC_000008.11_20037*;NC_000011.10_25091;hsa-miR-515-5p;NC_000003.12_7520;hsa-miR-548d-3p;NC_000012.12_26721;hsa-miR-296-3p…
AHNAK2	ENST00000261530	0.377551	9.77296e-61	44	hsa-miR-934;hsa-miR-33b-3p;NC_000006.12_14671;hsa-miR-25-5p;hsa-miR-372-5p;hsa-miR-30c-1-3p;NC_000023.11_36905;NC_000010.11_23303;hsa-miR-371b-3p;hsa-miR-92a-1-5p;NC_000003.12_7276;NC_000007.14_17821;hsa-miR-27b-5p;NC_000010.11_23646;NC_000012.12_25887;hsa-miR-18a-3p;NC_000011.10_25384;hsa-miR-302c-5p;NC_000006.12_15809;NC_000013.11_27627;NC_000005.10_14158;NC_000022.11_36437;hsa-miR-1257;hsa-miR…
MEF2A	NR_033268	0.53211	1.00861e-60	45	hsa-miR-371a-5p;hsa-miR-372-5p;NC_000013.11_28441;hsa-miR-30c-1-3p;NC_000023.11_36905;hsa-miR-371b-3p;hsa-miR-92a-1-5p;hsa-miR-518e-5p>hsa-miR-519a-5p>hsa-miR-519b-5p>hsa-miR-519c-5p>hsa-miR-522-5p>hsa-miR-523-5p;NC_000003.12_7276;NC_000007.14_17821;hsa-miR-302a-5p;hsa-miR-1298-5p;NC_000021.9_35751;NC_000003.12_8583;hsa-miR-18a-3p;NC_000010.11_23646;NC_000012.12_25887;hsa-miR-629-3p;hsa-miR-302c-…
VTI1A	NONHSAT224112	0.853333	1.1988e-60	44	hsa-miR-371a-5p;hsa-miR-372-5p;hsa-miR-3155a;NC_000013.11_28441;NC_000008.11_19445;hsa-miR-498;NC_000010.11_23303;hsa-miR-92a-1-5p;hsa-miR-629-3p;hsa-miR-3662;NC_000007.14_17821;NC_000003.12_8583;NC_000012.12_25887;hsa-miR-18a-3p;NC_000004.12_10500;NC_000006.12_15769;NC_000022.11_36372;NC_000022.11_36437;hsa-miR-26a-1-3p;hsa-miR-7-5p;hsa-miR-520a-3p;hsa-miR-512-3p;hsa-miR-345-5p;hsa-miR-5585-3p;N…
MTMR9	ENST00000237264	0.611765	1.23875e-60	42	NC_000001.11_2008;hsa-miR-33b-3p;NC_000013.11_28441;NC_000005.10_12140;NC_000008.11_19445;NC_000005.10_12588;hsa-miR-675-5p;hsa-miR-7974;hsa-miR-518e-5p>hsa-miR-519a-5p>hsa-miR-519b-5p>hsa-miR-519c-5p>hsa-miR-522-5p>hsa-miR-523-5p;hsa-miR-3662;hsa-miR-510-5p;hsa-miR-1298-5p;NC_000021.9_35751;hsa-miR-27b-5p;NC_000012.12_25887;NC_000011.10_25384;NC_000004.12_9892;hsa-miR-302c-5p;hsa-miR-34c-5p;NC_0…
MEF2A	ENST00000563635	0.662162	1.36998e-60	41	hsa-miR-33b-3p;NC_000006.12_14671;hsa-miR-372-5p;NC_000013.11_28441;NC_000008.11_19445;hsa-miR-498;hsa-miR-518e-5p>hsa-miR-519a-5p>hsa-miR-519b-5p>hsa-miR-519c-5p>hsa-miR-522-5p>hsa-miR-523-5p;NC_000003.12_7276;hsa-miR-3662;NC_000007.14_17821;hsa-miR-302a-5p;NC_000021.9_35751;NC_000003.12_8583;hsa-miR-18a-3p;NC_000012.12_25887;NC_000011.10_25384;NC_000004.12_9892;hsa-miR-302c-5p;NC_000006.12_1576…
MEF2A	ENST00000568777	0.568182	1.36998e-60	41	hsa-miR-33b-3p;hsa-miR-372-5p;NC_000013.11_28441;hsa-miR-30c-1-3p;hsa-miR-371b-3p;hsa-miR-675-5p;hsa-miR-92a-1-5p;hsa-miR-518e-5p>hsa-miR-519a-5p>hsa-miR-519b-5p>hsa-miR-519c-5p>hsa-miR-522-5p>hsa-miR-523-5p;NC_000003.12_7276;hsa-miR-629-3p;NC_000010.11_23646;NC_000003.12_8583;NC_000012.12_25887;hsa-miR-18a-3p;NC_000004.12_9892;hsa-miR-302c-5p;NC_000006.12_15769;hsa-miR-26a-1-3p;hsa-miR-7-5p;NC_0…
ARHGAP5	NR_038921	0.6	1.63977e-60	39	hsa-miR-372-5p;hsa-miR-30c-1-3p;NC_000008.11_19445;NC_000005.10_12588;NC_000007.14_17821;hsa-miR-27b-5p;NC_000021.9_35751;NC_000012.12_25887;NC_000011.10_25384;NC_000004.12_9892;NC_000009.12_21255;NC_000006.12_15769;hsa-miR-17-5p;NC_000013.11_27627;NC_000022.11_36372;hsa-miR-26a-1-3p;hsa-miR-1257;NC_000001.11_3101;NC_000002.12_3238;NC_000003.12_7973;hsa-miR-515-5p;NC_000020.11_35116;NC_000016.10_…
HIPK3	NR_038921	0.59	1.73238e-60	40	hsa-miR-372-5p;hsa-miR-30c-1-3p;NC_000008.11_19445;NC_000005.10_12588;hsa-miR-7974;hsa-miR-518e-5p>hsa-miR-519a-5p>hsa-miR-519b-5p>hsa-miR-519c-5p>hsa-miR-522-5p>hsa-miR-523-5p;NC_000021.9_35751;NC_000012.12_25887;NC_000011.10_25384;NC_000005.10_11919>NC_000005.10_11920;NC_000004.12_9892;NC_000012.12_26286;NC_000006.12_15769;hsa-miR-17-5p;NC_000006.12_15809;NC_000013.11_27627;NC_000022.11_36372;h…
ADAM20	ENST00000261530	0.540816	2.25419e-60	47	hsa-miR-934;hsa-miR-33b-3p;NC_000006.12_14671;hsa-miR-372-5p;NC_000013.11_28441;hsa-miR-30c-1-3p;NC_000023.11_36905;NC_000010.11_23303;hsa-miR-371b-3p;hsa-miR-92a-1-5p;NC_000003.12_7276;NC_000007.14_17821;NC_000010.11_23646;NC_000021.9_35751;NC_000012.12_25887;hsa-miR-18a-3p;NC_000011.10_25384;NC_000005.10_11919>NC_000005.10_11920;hsa-miR-302c-5p;hsa-miR-34c-5p;NC_000006.12_15809;NC_000022.11_364…
SCYL2	ENST00000281092	0.345	3.32994e-60	39	hsa-miR-33b-3p;hsa-miR-372-5p;NC_000008.11_19445;NC_000010.11_23303;hsa-miR-92a-1-5p;NC_000012.12_25887;NC_000021.9_35751;NC_000011.10_25384;NC_000004.12_9892;NC_000006.12_15769;hsa-miR-17-5p;hsa-miR-34c-5p;NC_000013.11_27627;NC_000022.11_36372;hsa-miR-1257;hsa-miR-7-5p;NC_000002.12_3238;NC_000008.11_20037*;NC_000011.10_25091;hsa-miR-15b-3p;hsa-miR-3529-3p;NC_000003.12_7520;NC_000016.10_31157;NC_…
FBXO32	NR_038921	0.51	5.16508e-60	40	hsa-miR-372-5p;hsa-miR-30c-1-3p;NC_000008.11_19445;hsa-miR-371b-3p;NC_000005.10_12588;hsa-miR-7974;hsa-miR-3662;NC_000007.14_17821;NC_000012.12_25887;NC_000011.10_25384;NC_000004.12_9892;hsa-miR-302c-5p;NC_000012.12_26286;NC_000006.12_15769;hsa-miR-17-5p;NC_000013.11_27627;NC_000022.11_36372;hsa-miR-1257;hsa-miR-26a-1-3p;NC_000001.11_3101;NC_000003.12_7973;NC_000015.10_30316;hsa-miR-512-3p;NC_000…
TMEM181	ENST00000261530	0.285714	5.56461e-60	39	hsa-miR-1323;hsa-miR-372-5p;hsa-miR-30c-1-3p;NC_000008.11_19445;hsa-miR-92a-1-5p;hsa-miR-629-3p;NC_000007.14_17821;NC_000003.12_7276;hsa-miR-1298-5p;NC_000012.12_25887;hsa-miR-18a-3p;NC_000004.12_9892;hsa-miR-302c-5p;hsa-miR-17-5p;hsa-miR-34c-5p;NC_000013.11_27627;hsa-miR-1257;hsa-miR-7-5p;NC_000002.12_3238;NC_000003.12_7973;NC_000012.12_25503;hsa-miR-519a-3p;hsa-miR-345-5p;hsa-miR-515-5p;NC_0000…
KIF3A	ENST00000261530	0.295918	5.56461e-60	39	hsa-miR-33b-3p;hsa-miR-372-5p;hsa-miR-30c-1-3p;hsa-miR-498;NC_000008.11_19445;hsa-miR-629-3p;NC_000012.12_25887;NC_000011.10_25384;NC_000004.12_9892;hsa-miR-302c-5p;hsa-miR-17-5p;NC_000013.11_27627;hsa-miR-26a-1-3p;hsa-miR-7-5p;NC_000003.12_7973;NC_000012.12_25503;hsa-miR-345-5p;hsa-miR-3529-3p;hsa-miR-515-5p;NC_000003.12_7520;NC_000020.11_35116;NC_000012.12_26414;NC_000018.10_33037;hsa-miR-548d-…
LYST	ENST00000568777	0.704545	7.02803e-60	42	NC_000001.11_2008;hsa-miR-934;hsa-miR-33b-3p;hsa-miR-372-5p;NC_000013.11_28441;hsa-miR-30c-1-3p;NC_000005.10_12588;hsa-miR-92a-1-5p;hsa-miR-518e-5p>hsa-miR-519a-5p>hsa-miR-519b-5p>hsa-miR-519c-5p>hsa-miR-522-5p>hsa-miR-523-5p;hsa-miR-629-3p;NC_000010.11_23646;NC_000003.12_8583;NC_000012.12_25887;hsa-miR-302c-5p;NC_000006.12_15769;hsa-miR-34c-5p;NC_000020.11_34925;hsa-miR-26a-1-3p;hsa-miR-7-5p;NC_…
XIAP	ENST00000281092	0.43	1.28219e-59	44	hsa-miR-934;hsa-miR-372-5p;hsa-miR-30c-1-3p;hsa-miR-498;NC_000008.11_19445;NC_000010.11_23303;hsa-miR-675-5p;hsa-miR-629-3p;NC_000021.9_35751;NC_000012.12_25887;hsa-miR-18a-3p;NC_000011.10_25384;NC_000004.12_9892;hsa-miR-302c-5p;NC_000006.12_15769;hsa-miR-17-5p;hsa-miR-34c-5p;NC_000013.11_27627;NC_000022.11_36372;hsa-miR-1257;hsa-miR-26a-1-3p;hsa-miR-7-5p;NC_000001.11_3101;NC_000008.11_20037*;NC_…
RALGPS2	NR_033268	0.53211	1.45132e-59	45	hsa-miR-934;hsa-miR-371a-5p;hsa-miR-372-5p;hsa-miR-3155a;NC_000013.11_28441;hsa-miR-30c-1-3p;NC_000023.11_36905;NC_000010.11_23303;hsa-miR-92a-1-5p;hsa-miR-518b;hsa-miR-518e-5p>hsa-miR-519a-5p>hsa-miR-519b-5p>hsa-miR-519c-5p>hsa-miR-522-5p>hsa-miR-523-5p;hsa-miR-629-3p;NC_000007.14_17821;hsa-miR-302a-5p;hsa-miR-1298-5p;NC_000010.11_23646;NC_000012.12_25887;hsa-miR-18a-3p;hsa-miR-302c-5p;NC_000006…
SLC38A1	NR_038921	0.59	2.03539e-59	41	hsa-miR-25-5p;hsa-miR-372-5p;NC_000013.11_28441;hsa-miR-30c-1-3p;NC_000008.11_19445;hsa-miR-371b-3p;hsa-miR-7974;hsa-miR-3662;hsa-miR-27b-5p;NC_000012.12_25887;NC_000011.10_25384;NC_000004.12_9892;NC_000009.12_21255;hsa-miR-302c-5p;NC_000006.12_15769;hsa-miR-17-5p;NC_000013.11_27627;NC_000022.11_36372;hsa-miR-1257;hsa-miR-26a-1-3p;NC_000001.11_3101;NC_000002.12_3238;NC_000003.12_7973;NC_000015.10…
SLC7A11	NR_033268	0.513761	2.81051e-59	44	hsa-miR-934;NC_000009.12_21574;hsa-miR-372-5p;NC_000013.11_28441;NC_000009.12_20733;hsa-miR-30c-1-3p;hsa-miR-3155a;NC_000023.11_36905;hsa-miR-518b;hsa-miR-518e-5p>hsa-miR-519a-5p>hsa-miR-519b-5p>hsa-miR-519c-5p>hsa-miR-522-5p>hsa-miR-523-5p;NC_000003.12_7276;NC_000007.14_17821;hsa-miR-302a-5p;NC_000010.11_23646;NC_000021.9_35751;NC_000012.12_25887;hsa-miR-302c-5p;NC_000012.12_26286;NC_000006.12_1…
LYST	NR_033268	0.605505	2.89009e-59	46	hsa-miR-934;hsa-miR-372-5p;NC_000013.11_28441;hsa-miR-30c-1-3p;NC_000010.11_23303;hsa-miR-92a-1-5p;hsa-miR-7974;hsa-miR-518e-5p>hsa-miR-519a-5p>hsa-miR-519b-5p>hsa-miR-519c-5p>hsa-miR-522-5p>hsa-miR-523-5p;hsa-miR-629-3p;NC_000007.14_17821;hsa-miR-510-5p;hsa-miR-1298-5p;NC_000021.9_35751;NC_000003.12_8583;NC_000010.11_23646;NC_000012.12_25887;hsa-miR-302c-5p;NC_000012.12_26286;NC_000006.12_15769;…
PLEKHH2	ENST00000261530	0.316327	3.61048e-59	39	NC_000001.11_2008;hsa-miR-33b-3p;hsa-miR-372-5p;hsa-miR-30c-1-3p;NC_000008.11_19445;NC_000023.11_36905;NC_000003.12_7276;NC_000021.9_35751;NC_000012.12_25887;hsa-miR-18a-3p;NC_000011.10_25384;NC_000018.10_33742;NC_000005.10_11919>NC_000005.10_11920;NC_000004.12_9892;hsa-miR-17-5p;hsa-miR-1257;NC_000003.12_7973;hsa-miR-519a-3p;NC_000015.10_30316;hsa-miR-345-5p;hsa-miR-515-5p;NC_000003.12_7520;NC_0…
PIK3CA	NONHSAT215932	0.537815	3.87824e-59	42	hsa-miR-934;hsa-miR-33b-3p;hsa-miR-372-5p;NC_000013.11_28441;hsa-miR-30c-1-3p;hsa-miR-92a-1-5p;hsa-miR-7974;hsa-miR-518e-5p>hsa-miR-519a-5p>hsa-miR-519b-5p>hsa-miR-519c-5p>hsa-miR-522-5p>hsa-miR-523-5p;NC_000007.14_17821;NC_000010.11_23646;NC_000012.12_25887;NC_000011.10_25384;NC_000005.10_11919>NC_000005.10_11920;hsa-miR-302c-5p;NC_000006.12_15769;hsa-miR-17-5p;NC_000013.11_27627;hsa-miR-26a-1-3…
MEF2A	NR_038921	0.62	3.87824e-59	42	hsa-miR-372-5p;NC_000013.11_28441;hsa-miR-30c-1-3p;NC_000008.11_19445;hsa-miR-371b-3p;hsa-miR-518e-5p>hsa-miR-519a-5p>hsa-miR-519b-5p>hsa-miR-519c-5p>hsa-miR-522-5p>hsa-miR-523-5p;hsa-miR-3662;NC_000007.14_17821;hsa-miR-1298-5p;NC_000021.9_35751;NC_000012.12_25887;NC_000011.10_25384;NC_000004.12_9892;NC_000009.12_21255;hsa-miR-302c-5p;NC_000006.12_15769;hsa-miR-17-5p;NC_000013.11_27627;NC_000022.…
ABCC4	NR_033268	0.495413	4.10686e-59	43	hsa-miR-372-5p;hsa-miR-3155a;hsa-miR-30c-1-3p;NC_000010.11_23303;hsa-miR-92a-1-5p;hsa-miR-7974;NC_000003.12_7276;NC_000007.14_17821;hsa-miR-1298-5p;NC_000010.11_23646;NC_000021.9_35751;NC_000003.12_8583;hsa-miR-18a-3p;NC_000012.12_25887;hsa-miR-629-3p;hsa-miR-302c-5p;NC_000012.12_26286;NC_000006.12_15769;hsa-miR-17-5p;NC_000022.11_36372;NC_000005.10_14158;NC_000002.12_3238;NC_000003.12_9133;NC_00…
DNAJC10	NR_038921	0.59	4.75427e-59	38	hsa-miR-372-5p;NC_000013.11_28441;hsa-miR-30c-1-3p;NC_000008.11_19445;NC_000005.10_12588;hsa-miR-7974;NC_000007.14_17821;hsa-miR-1298-5p;NC_000012.12_25887;NC_000011.10_25384;NC_000004.12_9892;hsa-miR-302c-5p;NC_000006.12_15769;hsa-miR-17-5p;NC_000013.11_27627;NC_000022.11_36372;hsa-miR-1257;hsa-miR-26a-1-3p;NC_000003.12_7973;NC_000015.10_30316;NC_000020.11_35116;NC_000016.10_31157;NC_000018.10_3…
SLC39A10	ENST00000237264	0.647059	5.0964e-59	41	NC_000001.11_2008;hsa-miR-33b-3p;NC_000006.12_14671;NC_000013.11_28441;NC_000008.11_19445;NC_000005.10_12588;hsa-miR-92a-1-5p;hsa-miR-7974;hsa-miR-518e-5p>hsa-miR-519a-5p>hsa-miR-519b-5p>hsa-miR-519c-5p>hsa-miR-522-5p>hsa-miR-523-5p;hsa-miR-3662;hsa-miR-1298-5p;hsa-miR-27b-5p;NC_000012.12_25887;NC_000011.10_25384;NC_000005.10_11919>NC_000005.10_11920;hsa-miR-302c-5p;NC_000006.12_15769;hsa-miR-34c…
CHD9	NR_038921	0.58	5.76523e-59	39	NC_000001.11_2008;hsa-miR-30c-1-3p;NC_000005.10_12588;hsa-miR-7974;NC_000007.14_17821;hsa-miR-27b-5p;NC_000021.9_35751;NC_000012.12_25887;NC_000011.10_25384;NC_000005.10_11919>NC_000005.10_11920;NC_000004.12_9892;hsa-miR-302c-5p;NC_000012.12_26286;NC_000006.12_15769;hsa-miR-17-5p;NC_000013.11_27627;NC_000022.11_36372;hsa-miR-26a-1-3p;hsa-miR-1257;NC_000002.12_3238;NC_000003.12_7973;NC_000015.10_3…
GALNT5	NONHSAT224112	0.773333	1.00618e-58	42	hsa-miR-371a-5p;hsa-miR-372-5p;NC_000013.11_28441;NC_000008.11_19445;NC_000010.11_23303;hsa-miR-92a-1-5p;hsa-miR-629-3p;hsa-miR-3662;NC_000007.14_17821;NC_000003.12_8583;NC_000012.12_25887;hsa-miR-18a-3p;NC_000004.12_10500;NC_000006.12_15769;NC_000013.11_27627;NC_000022.11_36372;NC_000022.11_36437;hsa-miR-26a-1-3p;hsa-miR-7-5p;NC_000003.12_9133;hsa-miR-520a-3p;hsa-miR-512-3p;hsa-miR-5585-3p;NC_00…
XIAP	NR_033268	0.522936	1.10711e-58	43	hsa-miR-934;hsa-miR-371a-5p;hsa-miR-372-5p;hsa-miR-3155a;NC_000013.11_28441;hsa-miR-30c-1-3p;NC_000010.11_23303;hsa-miR-518b;hsa-miR-7974;NC_000003.12_7276;NC_000007.14_17821;hsa-miR-510-5p;hsa-miR-302a-5p;NC_000021.9_35751;NC_000003.12_8583;hsa-miR-18a-3p;NC_000010.11_23646;NC_000012.12_25887;hsa-miR-629-3p;hsa-miR-302c-5p;NC_000006.12_15769;hsa-miR-17-5p;NC_000022.11_36372;hsa-miR-26a-1-3p;hsa-…
CPEB4	NR_038921	0.61	1.13684e-58	40	hsa-miR-25-5p;hsa-miR-372-5p;hsa-miR-30c-1-3p;NC_000008.11_19445;NC_000005.10_12588;hsa-miR-7974;hsa-miR-3662;hsa-miR-27b-5p;NC_000007.14_17821;hsa-miR-1298-5p;NC_000012.12_25887;NC_000011.10_25384;NC_000009.12_21255;hsa-miR-302c-5p;NC_000012.12_26286;NC_000006.12_15769;NC_000013.11_27627;hsa-miR-26a-1-3p;hsa-miR-1257;NC_000002.12_3238;NC_000003.12_7973;NC_000015.10_30316;hsa-miR-512-3p;NC_000020…
CPEB4	NONHSAT215932	0.521008	1.13684e-58	40	hsa-miR-372-5p;hsa-miR-30c-1-3p;hsa-miR-498;NC_000010.11_23303;hsa-miR-92a-1-5p;hsa-miR-7974;NC_000007.14_17821;NC_000010.11_23646;NC_000012.12_25887;NC_000011.10_25384;hsa-miR-302c-5p;NC_000012.12_26286;NC_000006.12_15769;hsa-miR-34c-5p;NC_000013.11_27627;hsa-miR-1257;hsa-miR-26a-1-3p;NC_000002.12_3238;NC_000003.12_9133;NC_000003.12_7973;NC_000011.10_25091;hsa-miR-519a-3p;NC_000015.10_30316;hsa-…
CREBRF	NONHSAT215932	0.563025	1.13684e-58	40	hsa-miR-934;NC_000013.11_28441;hsa-miR-30c-1-3p;hsa-miR-498;NC_000023.11_36905;hsa-miR-7974;NC_000007.14_17821;NC_000012.12_25887;NC_000011.10_25384;hsa-miR-302c-5p;NC_000006.12_15769;hsa-miR-17-5p;hsa-miR-34c-5p;NC_000013.11_27627;NC_000005.10_14158;hsa-miR-1257;hsa-miR-26a-1-3p;NC_000002.12_3238;NC_000008.11_20037*;NC_000011.10_25091;hsa-miR-519a-3p;hsa-miR-15b-3p;NC_000003.12_7520;NC_000020.11…
CREBRF	NR_038921	0.62	1.13684e-58	40	NC_000001.11_2008;NC_000013.11_28441;hsa-miR-30c-1-3p;NC_000008.11_19445;NC_000005.10_12588;hsa-miR-7974;NC_000007.14_17821;hsa-miR-27b-5p;NC_000012.12_25887;NC_000011.10_25384;NC_000004.12_9892;NC_000009.12_21255;hsa-miR-302c-5p;NC_000006.12_15769;hsa-miR-17-5p;NC_000013.11_27627;NC_000022.11_36372;hsa-miR-26a-1-3p;hsa-miR-1257;NC_000001.11_3101;NC_000002.12_3238;hsa-miR-515-5p;NC_000020.11_3511…
MAP1LC3B	ENST00000534986	0.941176	1.45252e-58	27	hsa-miR-934;hsa-miR-30c-1-3p;hsa-miR-518e-5p>hsa-miR-519a-5p>hsa-miR-519b-5p>hsa-miR-519c-5p>hsa-miR-522-5p>hsa-miR-523-5p;hsa-miR-629-3p;hsa-miR-510-5p;hsa-miR-27b-5p;NC_000010.11_23646;NC_000004.12_10500;NC_000011.10_25384;NC_000018.10_33742;hsa-miR-302c-5p;NC_000013.11_27627;hsa-miR-26a-1-3p;hsa-miR-7-5p;NC_000001.11_3101;NC_000003.12_9133;NC_000003.12_7973;NC_000011.10_25091;hsa-miR-302b-5p;h…
ATP2B4	NR_033268	0.53211	1.7154e-58	44	hsa-miR-934;hsa-miR-371a-5p;hsa-miR-372-5p;NC_000013.11_28441;NC_000009.12_20733;hsa-miR-30c-1-3p;hsa-miR-3155a;NC_000023.11_36905;NC_000010.11_23303;hsa-miR-371b-3p;hsa-miR-92a-1-5p;hsa-miR-7974;hsa-miR-629-3p;NC_000007.14_17821;hsa-miR-510-5p;hsa-miR-302a-5p;NC_000021.9_35751;NC_000003.12_8583;hsa-miR-18a-3p;NC_000010.11_23646;NC_000012.12_25887;NC_000012.12_26286;NC_000006.12_15769;hsa-miR-17-…
GALNT5	NONHSAT215932	0.638655	1.85445e-58	43	hsa-miR-33b-3p;hsa-miR-372-5p;NC_000013.11_28441;hsa-miR-30c-1-3p;NC_000010.11_23303;hsa-miR-92a-1-5p;hsa-miR-518e-5p>hsa-miR-519a-5p>hsa-miR-519b-5p>hsa-miR-519c-5p>hsa-miR-522-5p>hsa-miR-523-5p;NC_000007.14_17821;NC_000010.11_23646;NC_000012.12_25887;NC_000011.10_25384;hsa-miR-302c-5p;NC_000006.12_15769;hsa-miR-17-5p;hsa-miR-34c-5p;NC_000013.11_27627;hsa-miR-26a-1-3p;hsa-miR-1257;NC_000002.12_3…
GALNT5	ENST00000237264	0.682353	1.85445e-58	43	hsa-miR-33b-3p;NC_000006.12_14671;NC_000013.11_28441;NC_000005.10_12140;NC_000008.11_19445;hsa-miR-92a-1-5p;hsa-miR-518e-5p>hsa-miR-519a-5p>hsa-miR-519b-5p>hsa-miR-519c-5p>hsa-miR-522-5p>hsa-miR-523-5p;hsa-miR-3662;hsa-miR-1298-5p;hsa-miR-510-5p;NC_000012.12_25887;hsa-miR-18a-3p;NC_000011.10_25384;hsa-miR-302c-5p;NC_000006.12_15769;hsa-miR-34c-5p;NC_000013.11_27627;NC_000022.11_36372;NC_000022.11…
USP53	ENST00000281092	0.355	2.31624e-58	38	hsa-miR-934;NC_000006.12_14671;NC_000008.11_19445;hsa-miR-498;NC_000005.10_12588;hsa-miR-27b-5p;NC_000021.9_35751;NC_000012.12_25887;NC_000011.10_25384;NC_000005.10_11919>NC_000005.10_11920;NC_000004.12_9892;NC_000006.12_15769;hsa-miR-17-5p;NC_000013.11_27627;hsa-miR-26a-1-3p;hsa-miR-1257;hsa-miR-7-5p;NC_000002.12_3238;NC_000008.11_20037*;NC_000003.12_7973;NC_000011.10_25091;hsa-miR-15b-3p;hsa-mi…
LCOR	ENST00000432045	0.775	2.81309e-58	36	hsa-miR-25-5p;hsa-miR-372-5p;hsa-miR-30c-1-3p;NC_000008.11_19445;NC_000003.12_7276;hsa-miR-629-3p;NC_000012.12_25887;NC_000011.10_25384;NC_000004.12_9892;NC_000006.12_15769;hsa-miR-17-5p;hsa-miR-34c-5p;NC_000022.11_36372;hsa-miR-26a-1-3p;hsa-miR-1257;hsa-miR-7-5p;NC_000008.11_20037*;NC_000011.10_25091;hsa-miR-515-5p;NC_000003.12_7520;NC_000020.11_35116;hsa-miR-548d-3p;NC_000012.12_26721;NT_187601…
MTMR9	NONHSAT215932	0.478992	2.99636e-58	41	hsa-miR-33b-3p;hsa-miR-372-5p;NC_000013.11_28441;hsa-miR-30c-1-3p;hsa-miR-498;NC_000023.11_36905;hsa-miR-7974;hsa-miR-518e-5p>hsa-miR-519a-5p>hsa-miR-519b-5p>hsa-miR-519c-5p>hsa-miR-522-5p>hsa-miR-523-5p;NC_000010.11_23646;NC_000021.9_35751;NC_000012.12_25887;NC_000011.10_25384;hsa-miR-302c-5p;NC_000012.12_26286;hsa-miR-17-5p;hsa-miR-34c-5p;NC_000013.11_27627;NC_000005.10_14158;hsa-miR-1257;hsa-m…
RALGPS2	NONHSAT224112	0.68	3.2564e-58	41	hsa-miR-371a-5p;hsa-miR-372-5p;hsa-miR-3155a;NC_000013.11_28441;NC_000008.11_19445;NC_000010.11_23303;hsa-miR-92a-1-5p;hsa-miR-629-3p;hsa-miR-3662;NC_000007.14_17821;NC_000012.12_25887;hsa-miR-18a-3p;NC_000004.12_10500;NC_000006.12_15769;NC_000013.11_27627;NC_000022.11_36372;NC_000022.11_36437;hsa-miR-26a-1-3p;hsa-miR-7-5p;NC_000003.12_9133;hsa-miR-512-3p;hsa-miR-345-5p;hsa-miR-5585-3p;NC_000020.…
RNF14	ENST00000261530	0.321429	3.32393e-58	42	hsa-miR-934;hsa-miR-33b-3p;NC_000006.12_14671;hsa-miR-372-5p;NC_000013.11_28441;hsa-miR-498;NC_000023.11_36905;hsa-miR-371b-3p;hsa-miR-92a-1-5p;NC_000003.12_7276;NC_000010.11_23646;NC_000012.12_25887;NC_000018.10_33742;hsa-miR-302c-5p;hsa-miR-17-5p;hsa-miR-34c-5p;NC_000006.12_15809;NC_000013.11_27627;NC_000005.10_14158;NC_000022.11_36437;hsa-miR-1257;hsa-miR-26a-1-3p;hsa-miR-7-5p;NC_000001.11_310…
GFPT1	NR_033268	0.477064	4.11465e-58	44	hsa-miR-934;hsa-miR-371a-5p;hsa-miR-372-5p;hsa-miR-3155a;hsa-miR-30c-1-3p;hsa-miR-371b-3p;hsa-miR-92a-1-5p;hsa-miR-629-3p;NC_000007.14_17821;hsa-miR-1298-5p;NC_000010.11_23646;NC_000003.12_8583;NC_000012.12_25887;hsa-miR-18a-3p;hsa-miR-302c-5p;NC_000012.12_26286;NC_000006.12_15769;hsa-miR-17-5p;NC_000022.11_36372;hsa-miR-7-5p;NC_000001.11_3101;NC_000003.12_9133;hsa-miR-520a-3p;NC_000011.10_25091;…
RASGRP3	ENST00000281092	0.29	4.93807e-58	39	hsa-miR-33b-3p;hsa-miR-372-5p;hsa-miR-498;NC_000008.11_19445;NC_000010.11_23303;hsa-miR-27b-5p;NC_000012.12_25887;hsa-miR-18a-3p;NC_000011.10_25384;hsa-miR-302c-5p;NC_000012.12_26286;NC_000006.12_15769;hsa-miR-17-5p;hsa-miR-34c-5p;NC_000013.11_27627;hsa-miR-1257;hsa-miR-26a-1-3p;hsa-miR-7-5p;NC_000002.12_3238;NC_000003.12_7973;NC_000012.12_25503;hsa-miR-345-5p;NC_000003.12_7520;NC_000018.10_33037…
RNF14	NONHSAT215932	0.470588	5.12397e-58	39	hsa-miR-934;hsa-miR-33b-3p;hsa-miR-372-5p;NC_000013.11_28441;hsa-miR-498;NC_000023.11_36905;hsa-miR-92a-1-5p;hsa-miR-518e-5p>hsa-miR-519a-5p>hsa-miR-519b-5p>hsa-miR-519c-5p>hsa-miR-522-5p>hsa-miR-523-5p;NC_000010.11_23646;NC_000012.12_25887;hsa-miR-302c-5p;NC_000012.12_26286;NC_000006.12_15769;hsa-miR-17-5p;hsa-miR-34c-5p;NC_000013.11_27627;NC_000005.10_14158;hsa-miR-1257;hsa-miR-26a-1-3p;NC_0000…
HIPK3	NONHSAT215932	0.571429	5.12397e-58	39	hsa-miR-372-5p;hsa-miR-30c-1-3p;hsa-miR-498;NC_000023.11_36905;hsa-miR-92a-1-5p;hsa-miR-7974;hsa-miR-518e-5p>hsa-miR-519a-5p>hsa-miR-519b-5p>hsa-miR-519c-5p>hsa-miR-522-5p>hsa-miR-523-5p;NC_000021.9_35751;NC_000012.12_25887;NC_000011.10_25384;NC_000005.10_11919>NC_000005.10_11920;NC_000012.12_26286;NC_000006.12_15769;hsa-miR-17-5p;hsa-miR-34c-5p;NC_000013.11_27627;hsa-miR-1257;NC_000002.12_3238;N…
GNE	ENST00000261530	0.285714	5.58171e-58	43	hsa-miR-934;hsa-miR-25-5p;NC_000013.11_28441;hsa-miR-30c-1-3p;NC_000010.11_23303;hsa-miR-92a-1-5p;hsa-miR-629-3p;NC_000007.14_17821;hsa-miR-1298-5p;NC_000010.11_23646;NC_000012.12_25887;NC_000018.10_33742;NC_000005.10_11919>NC_000005.10_11920;hsa-miR-302c-5p;hsa-miR-17-5p;hsa-miR-34c-5p;NC_000006.12_15809;NC_000013.11_27627;NC_000005.10_14158;NC_000022.11_36437;hsa-miR-1257;NC_000001.11_3101;NC_0…
TNFSF15	ENST00000261530	0.321429	6.19609e-58	44	hsa-miR-934;NC_000006.12_14671;hsa-miR-372-5p;NC_000013.11_28441;NC_000011.10_24389*;hsa-miR-30c-1-3p;NC_000008.11_19445;NC_000023.11_36905;NC_000010.11_23303;hsa-miR-92a-1-5p;hsa-miR-629-3p;hsa-miR-1298-5p;NC_000010.11_23646;hsa-miR-18a-3p;NC_000011.10_25384;NC_000004.12_9892;hsa-miR-302c-5p;hsa-miR-17-5p;hsa-miR-34c-5p;NC_000006.12_15809;NC_000022.11_36437;NC_000005.10_14158;hsa-miR-1257;hsa-mi…
HIVEP2	NONHSAT215932	0.521008	7.05015e-58	41	hsa-miR-934;hsa-miR-372-5p;NC_000013.11_28441;hsa-miR-30c-1-3p;hsa-miR-498;NC_000023.11_36905;NC_000010.11_23303;hsa-miR-92a-1-5p;hsa-miR-7974;NC_000007.14_17821;NC_000021.9_35751;NC_000012.12_25887;NC_000011.10_25384;hsa-miR-302c-5p;NC_000012.12_26286;NC_000006.12_15769;hsa-miR-17-5p;hsa-miR-34c-5p;NC_000013.11_27627;NC_000005.10_14158;hsa-miR-26a-1-3p;NC_000008.11_20037*;NC_000002.12_3238;NC_00…
HIVEP2	NR_038921	0.63	7.05015e-58	41	hsa-miR-372-5p;NC_000013.11_28441;hsa-miR-30c-1-3p;NC_000008.11_19445;hsa-miR-7974;hsa-miR-3662;hsa-miR-27b-5p;NC_000007.14_17821;NC_000021.9_35751;hsa-miR-1298-5p;NC_000012.12_25887;NC_000011.10_25384;NC_000004.12_9892;NC_000009.12_21255;hsa-miR-302c-5p;NC_000012.12_26286;NC_000006.12_15769;hsa-miR-17-5p;NC_000013.11_27627;NC_000022.11_36372;hsa-miR-26a-1-3p;NC_000001.11_3101;NC_000002.12_3238;N…
CPEB2	ENST00000237264	0.564706	7.05015e-58	41	hsa-miR-33b-3p;NC_000006.12_14671;NC_000013.11_28441;NC_000008.11_19445;NC_000005.10_12588;hsa-miR-675-5p;hsa-miR-92a-1-5p;hsa-miR-7974;hsa-miR-518e-5p>hsa-miR-519a-5p>hsa-miR-519b-5p>hsa-miR-519c-5p>hsa-miR-522-5p>hsa-miR-523-5p;hsa-miR-3662;hsa-miR-18a-3p;NC_000011.10_25384;NC_000004.12_9892;hsa-miR-302c-5p;hsa-miR-34c-5p;NC_000006.12_15809;NC_000022.11_36372;NC_000022.11_36437;hsa-miR-26a-1-3p…
AUTS2	NONHSAT215932	0.588235	7.61142e-58	43	hsa-miR-934;hsa-miR-33b-3p;hsa-miR-372-5p;hsa-miR-30c-1-3p;NC_000023.11_36905;NC_000010.11_23303;hsa-miR-92a-1-5p;hsa-miR-7974;hsa-miR-518e-5p>hsa-miR-519a-5p>hsa-miR-519b-5p>hsa-miR-519c-5p>hsa-miR-522-5p>hsa-miR-523-5p;NC_000007.14_17821;NC_000010.11_23646;NC_000021.9_35751;NC_000012.12_25887;NC_000011.10_25384;NC_000005.10_11919>NC_000005.10_11920;hsa-miR-302c-5p;NC_000012.12_26286;NC_000006.1…
FBXO32	ENST00000261530	0.321429	1.09514e-57	42	NC_000006.12_14671;hsa-miR-372-5p;hsa-miR-30c-1-3p;NC_000008.11_19445;NC_000010.11_23303;hsa-miR-371b-3p;NC_000005.10_12588;hsa-miR-629-3p;NC_000007.14_17821;NC_000012.12_25887;hsa-miR-18a-3p;NC_000011.10_25384;NC_000004.12_9892;hsa-miR-302c-5p;hsa-miR-17-5p;hsa-miR-34c-5p;NC_000013.11_27627;hsa-miR-26a-1-3p;hsa-miR-1257;hsa-miR-7-5p;NC_000001.11_3101;NC_000003.12_7973;NC_000015.10_30316;hsa-miR-…
DNAJC10	ENST00000263967	0.445205	1.1434e-57	38	hsa-miR-934;hsa-miR-372-5p;NC_000013.11_28441;hsa-miR-30c-1-3p;hsa-miR-498;hsa-miR-92a-1-5p;hsa-miR-7974;NC_000007.14_17821;NC_000012.12_25887;NC_000011.10_25384;NC_000004.12_9892;hsa-miR-302c-5p;NC_000006.12_15769;hsa-miR-17-5p;NC_000013.11_27627;hsa-miR-1257;hsa-miR-26a-1-3p;hsa-miR-7-5p;hsa-miR-519a-3p;NC_000015.10_30316;NC_000020.11_35116;NC_000016.10_31157;NC_000012.12_26414;NC_000018.10_330…
CPPED1	ENST00000281092	0.305	1.31602e-57	38	hsa-miR-30c-1-3p;hsa-miR-498;NC_000008.11_19445;hsa-miR-629-3p;hsa-miR-1298-5p;NC_000012.12_25887;hsa-miR-18a-3p;NC_000011.10_25384;NC_000005.10_11919>NC_000005.10_11920;NC_000004.12_9892;NC_000006.12_15769;hsa-miR-17-5p;hsa-miR-34c-5p;NC_000013.11_27627;hsa-miR-1257;hsa-miR-26a-1-3p;hsa-miR-7-5p;NC_000003.12_7973;NC_000012.12_25503;hsa-miR-3529-3p;hsa-miR-515-5p;NC_000020.11_35116;NC_000003.12_7…
PLEKHH2	ENST00000281092	0.355	1.31602e-57	38	NC_000001.11_2008;hsa-miR-33b-3p;hsa-miR-372-5p;hsa-miR-30c-1-3p;NC_000008.11_19445;NC_000021.9_35751;NC_000012.12_25887;hsa-miR-18a-3p;NC_000011.10_25384;NC_000005.10_11919>NC_000005.10_11920;NC_000004.12_9892;NC_000012.12_26286;NC_000006.12_15769;hsa-miR-17-5p;NC_000022.11_36372;hsa-miR-1257;NC_000003.12_7973;NC_000011.10_25091;hsa-miR-15b-3p;hsa-miR-345-5p;hsa-miR-515-5p;NC_000003.12_7520;NC_0…
SLC38A2	ENST00000281092	0.295	1.31602e-57	38	hsa-miR-33b-3p;NC_000008.11_19445;hsa-miR-629-3p;hsa-miR-27b-5p;NC_000012.12_25887;NC_000021.9_35751;NC_000011.10_25384;NC_000004.12_9892;hsa-miR-302c-5p;NC_000012.12_26286;NC_000006.12_15769;NC_000006.12_15809;NC_000013.11_27627;NC_000022.11_36372;NC_000005.10_14158;hsa-miR-26a-1-3p;hsa-miR-7-5p;NC_000001.11_3101;NC_000002.12_3238;hsa-miR-345-5p;hsa-miR-3529-3p;NC_000003.12_7520;NC_000018.10_330…
MAP2	NONHSAT224112	0.626667	1.41499e-57	41	hsa-miR-372-5p;hsa-miR-3155a;NC_000013.11_28441;NC_000008.11_19445;hsa-miR-498;NC_000010.11_23303;hsa-miR-629-3p;hsa-miR-3662;NC_000007.14_17821;NC_000003.12_8583;NC_000012.12_25887;NC_000004.12_10500;NC_000006.12_15769;NC_000013.11_27627;hsa-miR-26a-1-3p;NC_000022.11_36437;hsa-miR-7-5p;NC_000003.12_9133;hsa-miR-512-3p;hsa-miR-345-5p;hsa-miR-5585-3p;NC_000020.11_35116;NC_000009.12_21957;NC_000016…
CREBRF	ENST00000432045	0.6625	1.55801e-57	36	hsa-miR-30c-1-3p;NC_000008.11_19445;hsa-miR-498;NC_000012.12_25887;hsa-miR-18a-3p;NC_000011.10_25384;NC_000004.12_9892;NC_000009.12_21255;NC_000006.12_15769;hsa-miR-17-5p;hsa-miR-34c-5p;NC_000022.11_36372;hsa-miR-26a-1-3p;hsa-miR-1257;hsa-miR-7-5p;NC_000008.11_20037*;NC_000011.10_25091;hsa-miR-515-5p;NC_000003.12_7520;NC_000020.11_35116;hsa-miR-548d-3p;NC_000012.12_26721;hsa-miR-296-3p;NT_187601.…
OCLN	ENST00000261530	0.316327	1.69864e-57	40	hsa-miR-25-5p;NC_000013.11_28441;hsa-miR-30c-1-3p;NC_000008.11_19445;NC_000005.10_12588;hsa-miR-92a-1-5p;NC_000007.14_17821;NC_000010.11_23646;hsa-miR-18a-3p;NC_000011.10_25384;NC_000018.10_33742;hsa-miR-17-5p;hsa-miR-34c-5p;NC_000013.11_27627;NC_000022.11_36437;NC_000005.10_14158;hsa-miR-26a-1-3p;hsa-miR-7-5p;NC_000003.12_7973;NC_000012.12_25503;hsa-miR-519a-3p;NC_000015.10_30316;hsa-miR-3529-3p…
RPS6KA2	ENST00000261530	0.285714	1.69864e-57	40	NC_000006.12_14671;hsa-miR-372-5p;hsa-miR-30c-1-3p;NC_000008.11_19445;NC_000023.11_36905;NC_000010.11_23303;NC_000005.10_12588;hsa-miR-92a-1-5p;hsa-miR-629-3p;NC_000003.12_7276;NC_000007.14_17821;hsa-miR-1298-5p;NC_000021.9_35751;NC_000012.12_25887;hsa-miR-18a-3p;NC_000005.10_11919>NC_000005.10_11920;hsa-miR-302c-5p;hsa-miR-17-5p;NC_000013.11_27627;NC_000022.11_36437;hsa-miR-26a-1-3p;NC_000015.10…
SCYL2	NONHSAT215932	0.403361	1.91518e-57	36	hsa-miR-33b-3p;hsa-miR-372-5p;NC_000013.11_28441;NC_000023.11_36905;NC_000010.11_23303;hsa-miR-92a-1-5p;hsa-miR-7974;NC_000007.14_17821;NC_000010.11_23646;NC_000021.9_35751;NC_000012.12_25887;NC_000011.10_25384;NC_000006.12_15769;hsa-miR-17-5p;hsa-miR-34c-5p;NC_000013.11_27627;hsa-miR-1257;NC_000002.12_3238;NC_000008.11_20037*;NC_000011.10_25091;hsa-miR-519a-3p;hsa-miR-15b-3p;NC_000003.12_7520;NC…
ADAM20	NONHSAT215932	0.638655	1.95123e-57	42	hsa-miR-934;hsa-miR-33b-3p;hsa-miR-372-5p;NC_000013.11_28441;hsa-miR-30c-1-3p;NC_000023.11_36905;NC_000010.11_23303;hsa-miR-92a-1-5p;hsa-miR-7974;hsa-miR-518e-5p>hsa-miR-519a-5p>hsa-miR-519b-5p>hsa-miR-519c-5p>hsa-miR-522-5p>hsa-miR-523-5p;NC_000007.14_17821;NC_000010.11_23646;NC_000021.9_35751;NC_000012.12_25887;NC_000011.10_25384;NC_000005.10_11919>NC_000005.10_11920;hsa-miR-302c-5p;NC_000012.1…
MXD1	NONHSAT215932	0.521008	1.96395e-57	40	hsa-miR-33b-3p;NC_000013.11_28441;hsa-miR-30c-1-3p;NC_000023.11_36905;NC_000010.11_23303;hsa-miR-92a-1-5p;hsa-miR-7974;hsa-miR-518e-5p>hsa-miR-519a-5p>hsa-miR-519b-5p>hsa-miR-519c-5p>hsa-miR-522-5p>hsa-miR-523-5p;NC_000007.14_17821;NC_000010.11_23646;NC_000012.12_25887;NC_000011.10_25384;NC_000005.10_11919>NC_000005.10_11920;hsa-miR-302c-5p;NC_000006.12_15769;hsa-miR-17-5p;hsa-miR-26a-1-3p;hsa-mi…
XIAP	ENST00000263967	0.554795	1.96762e-57	41	hsa-miR-934;hsa-miR-372-5p;NC_000013.11_28441;hsa-miR-30c-1-3p;hsa-miR-498;hsa-miR-7974;hsa-miR-629-3p;hsa-miR-3662;NC_000007.14_17821;NC_000010.11_23646;NC_000012.12_25887;NC_000004.12_10500;NC_000011.10_25384;NC_000004.12_9892;NC_000009.12_21255;hsa-miR-302c-5p;NC_000006.12_15769;hsa-miR-17-5p;NC_000013.11_27627;hsa-miR-1257;hsa-miR-26a-1-3p;hsa-miR-7-5p;NC_000002.12_3238;NC_000011.10_25091;hsa…
SWT1	ENST00000281092	0.275	2.20276e-57	40	NC_000006.12_14671;hsa-miR-498;NC_000008.11_19445;hsa-miR-371b-3p;hsa-miR-92a-1-5p;NC_000012.12_25887;NC_000011.10_25384;NC_000004.12_9892;NC_000005.10_11919>NC_000005.10_11920;hsa-miR-302c-5p;NC_000012.12_26286;NC_000006.12_15769;hsa-miR-17-5p;NC_000013.11_27627;NC_000022.11_36372;hsa-miR-1257;hsa-miR-7-5p;NC_000002.12_3238;NC_000008.11_20037*;NC_000003.12_7973;NC_000012.12_25503;NC_000011.10_25…
AHNAK2	ENST00000281092	0.325	2.20282e-57	42	hsa-miR-934;hsa-miR-33b-3p;NC_000006.12_14671;hsa-miR-372-5p;hsa-miR-30c-1-3p;NC_000010.11_23303;hsa-miR-371b-3p;hsa-miR-92a-1-5p;hsa-miR-27b-5p;NC_000012.12_25887;hsa-miR-18a-3p;NC_000011.10_25384;hsa-miR-302c-5p;NC_000006.12_15769;NC_000006.12_15809;NC_000013.11_27627;NC_000022.11_36372;NC_000005.10_14158;hsa-miR-1257;hsa-miR-7-5p;NC_000001.11_3101;NC_000002.12_3238;NC_000012.12_25503;NC_000011…
USP53	ENST00000261530	0.346939	2.28979e-57	38	hsa-miR-934;NC_000006.12_14671;NC_000008.11_19445;NC_000023.11_36905;hsa-miR-498;NC_000005.10_12588;NC_000003.12_7276;NC_000007.14_17821;hsa-miR-27b-5p;NC_000021.9_35751;NC_000012.12_25887;NC_000011.10_25384;NC_000005.10_11919>NC_000005.10_11920;NC_000004.12_9892;hsa-miR-17-5p;NC_000013.11_27627;hsa-miR-1257;hsa-miR-26a-1-3p;hsa-miR-7-5p;NC_000002.12_3238;NC_000003.12_7973;hsa-miR-519a-3p;NC_0000…
OGDH	NR_033268	0.440367	2.79555e-57	38	hsa-miR-371a-5p;hsa-miR-372-5p;hsa-miR-3155a;NC_000023.11_36905;hsa-miR-371b-3p;NC_000010.11_23303;hsa-miR-92a-1-5p;hsa-miR-518b;hsa-miR-7974;hsa-miR-518e-5p>hsa-miR-519a-5p>hsa-miR-519b-5p>hsa-miR-519c-5p>hsa-miR-522-5p>hsa-miR-523-5p;hsa-miR-510-5p;hsa-miR-302a-5p;NC_000003.12_8583;hsa-miR-18a-3p;NC_000006.12_15769;hsa-miR-17-5p;NC_000005.10_14158;hsa-miR-26a-1-3p;hsa-miR-7-5p;NC_000001.11_3101…
FAM63B	ENST00000261530	0.357143	3.20561e-57	37	NC_000001.11_2008;hsa-miR-934;hsa-miR-25-5p;hsa-miR-372-5p;hsa-miR-30c-1-3p;hsa-miR-498;hsa-miR-629-3p;NC_000003.12_7276;NC_000007.14_17821;NC_000012.12_25887;hsa-miR-18a-3p;NC_000011.10_25384;NC_000018.10_33742;NC_000005.10_11919>NC_000005.10_11920;NC_000004.12_9892;hsa-miR-17-5p;NC_000013.11_27627;hsa-miR-1257;NC_000003.12_7973;hsa-miR-519a-3p;hsa-miR-3529-3p;hsa-miR-515-5p;NC_000020.11_35116;N…
HIPK2	NR_034072	0.873016	3.28436e-57	39	hsa-miR-934;hsa-miR-1323;hsa-miR-372-5p;NC_000013.11_28441;hsa-miR-30c-1-3p;hsa-miR-371b-3p;hsa-miR-7974;hsa-miR-3662;hsa-miR-510-5p;hsa-miR-302a-5p;NC_000012.12_25887;NC_000004.12_10500;NC_000011.10_25384;hsa-miR-302c-5p;NC_000006.12_15769;hsa-miR-17-5p;NC_000006.12_15809;NC_000013.11_27627;hsa-miR-26a-1-3p;hsa-miR-7-5p;NC_000002.12_3238;NC_000011.10_25091;hsa-miR-512-3p;hsa-miR-345-5p;hsa-miR-5…
LMO7	ENST00000281092	0.32	3.77289e-57	44	NC_000001.11_2008;hsa-miR-934;hsa-miR-33b-3p;NC_000006.12_14671;hsa-miR-30c-1-3p;NC_000008.11_19445;hsa-miR-27b-5p;NC_000012.12_25887;hsa-miR-18a-3p;NC_000011.10_25384;hsa-miR-302c-5p;NC_000012.12_26286;NC_000006.12_15769;hsa-miR-17-5p;hsa-miR-34c-5p;NC_000013.11_27627;NC_000022.11_36372;hsa-miR-1257;hsa-miR-26a-1-3p;hsa-miR-7-5p;NC_000001.11_3101;NC_000002.12_3238;NC_000003.12_7973;NC_000012.12_…
ASPH	NONHSAT215932	0.411765	4.00622e-57	39	hsa-miR-934;hsa-miR-33b-3p;hsa-miR-372-5p;hsa-miR-30c-1-3p;hsa-miR-498;hsa-miR-92a-1-5p;hsa-miR-7974;hsa-miR-518e-5p>hsa-miR-519a-5p>hsa-miR-519b-5p>hsa-miR-519c-5p>hsa-miR-522-5p>hsa-miR-523-5p;NC_000010.11_23646;NC_000012.12_25887;NC_000006.12_15769;hsa-miR-17-5p;hsa-miR-34c-5p;NC_000013.11_27627;hsa-miR-26a-1-3p;hsa-miR-1257;NC_000002.12_3238;NC_000011.10_25091;hsa-miR-519a-3p;NC_000015.10_303…
TTN	ENST00000237264	0.729412	4.08548e-57	42	NC_000001.11_2008;hsa-miR-33b-3p;NC_000006.12_14671;NC_000013.11_28441;NC_000005.10_12140;hsa-miR-92a-1-5p;hsa-miR-7974;hsa-miR-3662;hsa-miR-27b-5p;NC_000021.9_35751;NC_000012.12_25887;hsa-miR-18a-3p;NC_000011.10_25384;NC_000005.10_11919>NC_000005.10_11920;NC_000004.12_9892;hsa-miR-302c-5p;NC_000006.12_15769;hsa-miR-34c-5p;NC_000022.11_36372;NC_000022.11_36437;hsa-miR-1257;hsa-miR-26a-1-3p;hsa-mi…
MXD1	ENST00000261530	0.336735	4.62666e-57	43	hsa-miR-33b-3p;NC_000013.11_28441;hsa-miR-30c-1-3p;NC_000023.11_36905;NC_000010.11_23303;hsa-miR-371b-3p;hsa-miR-92a-1-5p;hsa-miR-629-3p;NC_000007.14_17821;NC_000010.11_23646;NC_000012.12_25887;NC_000011.10_25384;NC_000005.10_11919>NC_000005.10_11920;hsa-miR-302c-5p;hsa-miR-17-5p;NC_000006.12_15809;NC_000022.11_36437;hsa-miR-1257;hsa-miR-26a-1-3p;NC_000001.11_3101;NC_000002.12_3238;NC_000003.12_7…
RNF14	ENST00000281092	0.355	4.81498e-57	41	hsa-miR-934;hsa-miR-33b-3p;NC_000006.12_14671;hsa-miR-372-5p;hsa-miR-498;hsa-miR-371b-3p;hsa-miR-675-5p;hsa-miR-92a-1-5p;NC_000012.12_25887;hsa-miR-302c-5p;NC_000012.12_26286;NC_000006.12_15769;hsa-miR-17-5p;hsa-miR-34c-5p;NC_000006.12_15809;NC_000013.11_27627;NC_000005.10_14158;hsa-miR-1257;hsa-miR-26a-1-3p;hsa-miR-7-5p;NC_000001.11_3101;NC_000008.11_20037*;NC_000002.12_3238;NC_000003.12_7973;NC…
ABCC4	NONHSAT215932	0.462185	4.84336e-57	40	hsa-miR-33b-3p;hsa-miR-372-5p;hsa-miR-30c-1-3p;NC_000010.11_23303;hsa-miR-92a-1-5p;hsa-miR-7974;NC_000007.14_17821;NC_000010.11_23646;NC_000021.9_35751;NC_000012.12_25887;NC_000005.10_11919>NC_000005.10_11920;hsa-miR-302c-5p;NC_000012.12_26286;NC_000006.12_15769;hsa-miR-17-5p;NC_000013.11_27627;NC_000005.10_14158;hsa-miR-1257;NC_000002.12_3238;NC_000003.12_9133;NC_000003.12_7973;NC_000008.11_2003…
ERRFI1	NR_033268	0.422018	6.51907e-57	40	hsa-miR-372-5p;hsa-miR-3155a;hsa-miR-30c-1-3p;hsa-miR-7974;hsa-miR-518e-5p>hsa-miR-519a-5p>hsa-miR-519b-5p>hsa-miR-519c-5p>hsa-miR-522-5p>hsa-miR-523-5p;hsa-miR-629-3p;NC_000007.14_17821;hsa-miR-1298-5p;NC_000021.9_35751;NC_000003.12_8583;hsa-miR-18a-3p;NC_000012.12_25887;NC_000006.12_15769;hsa-miR-17-5p;NC_000022.11_36372;NC_000005.10_14158;hsa-miR-26a-1-3p;hsa-miR-7-5p;NC_000001.11_3101;NC_0000…
CLHC1	NR_033268	0.477064	6.51907e-57	40	hsa-miR-934;hsa-miR-371a-5p;hsa-miR-372-5p;hsa-miR-3155a;NC_000013.11_28441;NC_000009.12_20733;NC_000023.11_36905;hsa-miR-371b-3p;hsa-miR-92a-1-5p;hsa-miR-7974;NC_000003.12_7276;NC_000007.14_17821;hsa-miR-1298-5p;hsa-miR-302a-5p;NC_000021.9_35751;NC_000003.12_8583;hsa-miR-18a-3p;NC_000012.12_25887;hsa-miR-302c-5p;NC_000022.11_36372;hsa-miR-7-5p;NC_000001.11_3101;NC_000002.12_3238;NC_000003.12_913…
NAMPT	ENST00000261530	0.27551	6.83997e-57	40	hsa-miR-33b-3p;NC_000006.12_14671;hsa-miR-25-5p;hsa-miR-372-5p;NC_000013.11_28441;hsa-miR-30c-1-3p;NC_000023.11_36905;hsa-miR-92a-1-5p;NC_000003.12_7276;NC_000007.14_17821;hsa-miR-1298-5p;NC_000012.12_25887;NC_000011.10_25384;NC_000005.10_11919>NC_000005.10_11920;hsa-miR-302c-5p;hsa-miR-17-5p;hsa-miR-34c-5p;NC_000006.12_15809;NC_000013.11_27627;NC_000022.11_36437;hsa-miR-1257;hsa-miR-26a-1-3p;hsa…
KIF3A	ENST00000263967	0.369863	7.62182e-57	36	hsa-miR-33b-3p;hsa-miR-372-5p;hsa-miR-30c-1-3p;hsa-miR-498;hsa-miR-629-3p;NC_000012.12_25887;NC_000011.10_25384;NC_000004.12_9892;hsa-miR-302c-5p;NC_000006.12_15769;hsa-miR-17-5p;NC_000013.11_27627;hsa-miR-26a-1-3p;hsa-miR-7-5p;hsa-miR-15b-3p;hsa-miR-345-5p;NC_000003.12_7520;NC_000020.11_35116;NC_000016.10_31157;NC_000012.12_26414;NC_000018.10_33037;NC_000012.12_26721;NT_187601.1_39493>NC_000014.…
PIK3CA	NONHSAT224112	0.653333	8.10236e-57	40	hsa-miR-371a-5p;hsa-miR-372-5p;hsa-miR-3155a;NC_000013.11_28441;hsa-miR-92a-1-5p;hsa-miR-629-3p;hsa-miR-3662;NC_000007.14_17821;NC_000003.12_8583;NC_000012.12_25887;NC_000004.12_10500;NC_000006.12_15769;NC_000013.11_27627;hsa-miR-26a-1-3p;NC_000022.11_36437;hsa-miR-7-5p;NC_000003.12_9133;hsa-miR-520a-3p;NC_000023.11_38289;hsa-miR-512-3p;hsa-miR-345-5p;hsa-miR-5585-3p;hsa-miR-92a-3p;NC_000020.11_3…
NCKAP1	NR_038921	0.48	8.12042e-57	36	NC_000001.11_2008;hsa-miR-372-5p;hsa-miR-30c-1-3p;NC_000008.11_19445;NC_000005.10_12588;NC_000007.14_17821;NC_000012.12_25887;NC_000011.10_25384;NC_000004.12_9892;NC_000005.10_11919>NC_000005.10_11920;NC_000009.12_21255;hsa-miR-302c-5p;NC_000012.12_26286;NC_000006.12_15769;hsa-miR-17-5p;NC_000022.11_36372;hsa-miR-26a-1-3p;hsa-miR-1257;NC_000001.11_3101;NC_000002.12_3238;NC_000003.12_7973;hsa-miR-…
PLEC	NR_033268	0.513761	1.0862e-56	39	hsa-miR-371a-5p;hsa-miR-372-5p;hsa-miR-3155a;hsa-miR-30c-1-3p;NC_000023.11_36905;NC_000010.11_23303;hsa-miR-371b-3p;hsa-miR-92a-1-5p;hsa-miR-518b;hsa-miR-7974;NC_000003.12_7276;hsa-miR-510-5p;hsa-miR-302a-5p;NC_000021.9_35751;NC_000010.11_23646;hsa-miR-18a-3p;NC_000003.12_8583;NC_000012.12_26286;NC_000005.10_14158;hsa-miR-7-5p;NC_000002.12_3238;NC_000003.12_9133;hsa-miR-520a-3p;NC_000011.10_25091…
MAFG	NR_033268	0.431193	1.0862e-56	39	NC_000009.12_21574;hsa-miR-372-5p;hsa-miR-3155a;hsa-miR-30c-1-3p;hsa-miR-371b-3p;NC_000010.11_23303;hsa-miR-92a-1-5p;hsa-miR-518e-5p>hsa-miR-519a-5p>hsa-miR-519b-5p>hsa-miR-519c-5p>hsa-miR-522-5p>hsa-miR-523-5p;hsa-miR-510-5p;hsa-miR-302a-5p;NC_000003.12_8583;NC_000010.11_23646;hsa-miR-18a-3p;NC_000012.12_25887;NC_000004.12_9958;hsa-miR-302c-5p;NC_000012.12_26286;NC_000006.12_15769;hsa-miR-7-5p;N…
MTMR9	ENST00000263967	0.452055	1.15413e-56	41	hsa-miR-33b-3p;hsa-miR-372-5p;NC_000013.11_28441;hsa-miR-30c-1-3p;hsa-miR-498;hsa-miR-7974;hsa-miR-3662;NC_000010.11_23646;NC_000012.12_25887;NC_000004.12_10500;NC_000011.10_25384;NC_000004.12_9892;NC_000009.12_21255;hsa-miR-302c-5p;hsa-miR-17-5p;NC_000013.11_27627;hsa-miR-26a-1-3p;hsa-miR-1257;hsa-miR-7-5p;NC_000011.10_25091;hsa-miR-519a-3p;hsa-miR-15b-3p;NC_000003.12_7520;NC_000012.12_26414;NC_…
SLC38A2	ENST00000261530	0.265306	1.29948e-56	38	hsa-miR-33b-3p;NC_000013.11_28441;NC_000008.11_19445;hsa-miR-629-3p;hsa-miR-27b-5p;NC_000021.9_35751;NC_000012.12_25887;NC_000011.10_25384;NC_000004.12_9892;hsa-miR-302c-5p;NC_000006.12_15809;NC_000013.11_27627;NC_000022.11_36437;hsa-miR-26a-1-3p;NC_000005.10_14158;hsa-miR-7-5p;NC_000001.11_3101;NC_000002.12_3238;NC_000015.10_30316;hsa-miR-345-5p;hsa-miR-3529-3p;NC_000003.12_7520;NC_000018.10_330…
SCYL2	ENST00000261530	0.316327	1.29948e-56	38	hsa-miR-33b-3p;hsa-miR-372-5p;NC_000013.11_28441;NC_000008.11_19445;NC_000023.11_36905;NC_000010.11_23303;hsa-miR-92a-1-5p;NC_000007.14_17821;NC_000010.11_23646;NC_000012.12_25887;NC_000021.9_35751;NC_000011.10_25384;NC_000004.12_9892;hsa-miR-17-5p;hsa-miR-34c-5p;NC_000013.11_27627;hsa-miR-1257;hsa-miR-7-5p;NC_000002.12_3238;hsa-miR-519a-3p;hsa-miR-3529-3p;NC_000003.12_7520;NC_000018.10_33037;hsa…
ARHGAP5	ENST00000263967	0.452055	1.34159e-56	38	hsa-miR-372-5p;hsa-miR-30c-1-3p;hsa-miR-498;NC_000007.14_17821;NC_000012.12_25887;NC_000011.10_25384;NC_000018.10_33742;NC_000004.12_9892;NC_000009.12_21255;NC_000006.12_15769;hsa-miR-17-5p;NC_000013.11_27627;hsa-miR-26a-1-3p;hsa-miR-1257;NC_000002.12_3238;NC_000011.10_25091;hsa-miR-519a-3p;hsa-miR-15b-3p;hsa-miR-345-5p;NC_000003.12_7520;NC_000020.11_35116;NC_000016.10_31157;NC_000012.12_26414;NC…
SWT1	ENST00000263967	0.335616	1.34159e-56	38	NC_000013.11_28441;hsa-miR-498;hsa-miR-371b-3p;hsa-miR-92a-1-5p;hsa-miR-3662;NC_000010.11_23646;NC_000012.12_25887;NC_000004.12_10500;NC_000011.10_25384;NC_000018.10_33742;NC_000004.12_9892;NC_000005.10_11919>NC_000005.10_11920;hsa-miR-302c-5p;NC_000006.12_15769;hsa-miR-17-5p;NC_000013.11_27627;hsa-miR-1257;hsa-miR-7-5p;NC_000002.12_3238;NC_000011.10_25091;hsa-miR-15b-3p;NC_000003.12_7520;NC_0000…
RNF6	ENST00000281092	0.26	1.55517e-56	37	hsa-miR-934;hsa-miR-33b-3p;NC_000006.12_14671;NC_000010.11_23303;hsa-miR-675-5p;hsa-miR-92a-1-5p;hsa-miR-27b-5p;hsa-miR-18a-3p;NC_000011.10_25384;NC_000005.10_11919>NC_000005.10_11920;hsa-miR-302c-5p;NC_000006.12_15769;hsa-miR-17-5p;NC_000013.11_27627;hsa-miR-26a-1-3p;NC_000002.12_3238;NC_000008.11_20037*;NC_000012.12_25503;NC_000011.10_25091;hsa-miR-345-5p;hsa-miR-515-5p;NC_000020.11_35116;hsa-m…
XIAP	NONHSAT224112	0.666667	1.61044e-56	39	hsa-miR-371a-5p;hsa-miR-372-5p;hsa-miR-3155a;NC_000013.11_28441;NC_000008.11_19445;hsa-miR-498;NC_000010.11_23303;hsa-miR-629-3p;hsa-miR-3662;NC_000007.14_17821;NC_000003.12_8583;NC_000012.12_25887;hsa-miR-18a-3p;NC_000004.12_10500;NC_000006.12_15769;NC_000013.11_27627;NC_000022.11_36372;hsa-miR-26a-1-3p;hsa-miR-7-5p;NC_000003.12_9133;hsa-miR-520a-3p;hsa-miR-512-3p;hsa-miR-5585-3p;NC_000007.14_16…
LYST	NR_034072	0.84127	1.67433e-56	38	hsa-miR-934;hsa-miR-1323;hsa-miR-25-5p;hsa-miR-372-5p;NC_000013.11_28441;hsa-miR-30c-1-3p;hsa-miR-7974;hsa-miR-3662;hsa-miR-510-5p;NC_000012.12_25887;NC_000011.10_25384;hsa-miR-302c-5p;NC_000006.12_15769;hsa-miR-17-5p;NC_000006.12_15809;NC_000013.11_27627;hsa-miR-26a-1-3p;hsa-miR-7-5p;NC_000002.12_3238;NC_000012.12_25503;hsa-miR-512-3p;hsa-miR-345-5p;hsa-miR-3529-3p;hsa-miR-515-5p;NC_000003.12_75…
GFPT1	NR_038921	0.6	1.80511e-56	41	NC_000001.11_2008;hsa-miR-372-5p;hsa-miR-30c-1-3p;NC_000008.11_19445;hsa-miR-371b-3p;hsa-miR-3662;hsa-miR-27b-5p;NC_000007.14_17821;hsa-miR-1298-5p;NC_000012.12_25887;NC_000005.10_11919>NC_000005.10_11920;NC_000004.12_9892;NC_000009.12_21255;hsa-miR-302c-5p;NC_000012.12_26286;NC_000006.12_15769;hsa-miR-17-5p;NC_000006.12_15809;NC_000013.11_27627;NC_000022.11_36372;NC_000001.11_3101;NC_000003.12_7…
AHNAK2	NR_033268	0.568807	2.40826e-56	41	hsa-miR-934;hsa-miR-371a-5p;hsa-miR-372-5p;hsa-miR-3155a;hsa-miR-30c-1-3p;NC_000023.11_36905;NC_000010.11_23303;hsa-miR-371b-3p;hsa-miR-92a-1-5p;hsa-miR-7974;NC_000003.12_7276;NC_000007.14_17821;hsa-miR-510-5p;hsa-miR-302a-5p;NC_000010.11_23646;NC_000012.12_25887;hsa-miR-18a-3p;hsa-miR-302c-5p;NC_000006.12_15769;NC_000022.11_36372;NC_000005.10_14158;hsa-miR-7-5p;NC_000001.11_3101;NC_000002.12_323…
SCYL2	ENST00000263967	0.335616	3.47519e-56	36	hsa-miR-33b-3p;hsa-miR-372-5p;NC_000013.11_28441;hsa-miR-92a-1-5p;hsa-miR-7974;NC_000007.14_17821;NC_000010.11_23646;NC_000012.12_25887;NC_000011.10_25384;NC_000004.12_9892;NC_000006.12_15769;hsa-miR-17-5p;NC_000013.11_27627;hsa-miR-1257;hsa-miR-7-5p;NC_000002.12_3238;NC_000011.10_25091;hsa-miR-519a-3p;hsa-miR-15b-3p;NC_000003.12_7520;NC_000016.10_31157;NC_000018.10_33037;NC_000012.12_26721;hsa-m…
SLC38A1	NR_034072	0.825397	3.76029e-56	36	hsa-miR-934;hsa-miR-25-5p;hsa-miR-372-5p;NC_000013.11_28441;hsa-miR-30c-1-3p;hsa-miR-371b-3p;hsa-miR-7974;hsa-miR-3662;NC_000012.12_25887;NC_000004.12_10500;NC_000011.10_25384;hsa-miR-302c-5p;NC_000006.12_15769;hsa-miR-17-5p;NC_000013.11_27627;hsa-miR-26a-1-3p;hsa-miR-7-5p;NC_000002.12_3238;NC_000012.12_25503;NC_000011.10_25091;hsa-miR-512-3p;hsa-miR-345-5p;hsa-miR-3529-3p;hsa-miR-515-5p;NC_00000…
SLC38A1	ENST00000432045	0.775	3.76029e-56	36	NC_000006.12_14671;hsa-miR-25-5p;hsa-miR-372-5p;hsa-miR-30c-1-3p;NC_000008.11_19445;NC_000003.12_7276;hsa-miR-629-3p;NC_000012.12_25887;NC_000011.10_25384;NC_000004.12_9892;NC_000009.12_21255;NC_000006.12_15769;hsa-miR-17-5p;hsa-miR-34c-5p;NC_000022.11_36372;hsa-miR-26a-1-3p;hsa-miR-1257;hsa-miR-7-5p;NC_000011.10_25091;hsa-miR-515-5p;NC_000003.12_7520;NC_000020.11_35116;hsa-miR-548d-3p;NC_000012.…
EGFR	ENST00000263967	0.335616	4.30539e-56	38	hsa-miR-372-5p;hsa-miR-371b-3p;hsa-miR-92a-1-5p;hsa-miR-629-3p;hsa-miR-3662;NC_000010.11_23646;NC_000012.12_25887;NC_000004.12_10500;NC_000011.10_25384;NC_000018.10_33742;NC_000006.12_15769;hsa-miR-17-5p;NC_000013.11_27627;hsa-miR-26a-1-3p;NC_000022.11_36437;hsa-miR-7-5p;NC_000002.12_3238;NC_000011.10_25091;hsa-miR-519a-3p;NC_000015.10_30316;hsa-miR-15b-3p;hsa-miR-345-5p;NC_000020.11_35116;NC_000…
IQSEC2	NR_033268	0.46789	6.3928e-56	40	hsa-miR-934;hsa-miR-371a-5p;hsa-miR-3155a;hsa-miR-30c-1-3p;hsa-miR-371b-3p;hsa-miR-92a-1-5p;hsa-miR-518b;hsa-miR-7974;NC_000003.12_7276;hsa-miR-510-5p;NC_000010.11_23646;NC_000021.9_35751;NC_000012.12_25887;hsa-miR-18a-3p;NC_000003.12_8583;NC_000004.12_9958;NC_000012.12_26286;NC_000006.12_15769;NC_000005.10_14158;hsa-miR-7-5p;NC_000001.11_3101;NC_000002.12_3238;NC_000003.12_9133;NC_000023.11_3828…
KIF21B	NR_033268	0.504587	6.3928e-56	40	hsa-miR-372-5p;hsa-miR-3155a;hsa-miR-30c-1-3p;NC_000023.11_36905;hsa-miR-371b-3p;NC_000010.11_23303;hsa-miR-92a-1-5p;hsa-miR-7974;hsa-miR-518e-5p>hsa-miR-519a-5p>hsa-miR-519b-5p>hsa-miR-519c-5p>hsa-miR-522-5p>hsa-miR-523-5p;hsa-miR-629-3p;NC_000003.12_7276;NC_000007.14_17821;hsa-miR-510-5p;NC_000003.12_8583;NC_000021.9_35751;hsa-miR-18a-3p;NC_000012.12_25887;NC_000006.12_15769;hsa-miR-17-5p;NC_00…
RALGPS2	NONHSAT215932	0.554622	8.28636e-56	41	hsa-miR-934;hsa-miR-33b-3p;hsa-miR-372-5p;NC_000013.11_28441;hsa-miR-30c-1-3p;NC_000023.11_36905;NC_000010.11_23303;hsa-miR-92a-1-5p;hsa-miR-518e-5p>hsa-miR-519a-5p>hsa-miR-519b-5p>hsa-miR-519c-5p>hsa-miR-522-5p>hsa-miR-523-5p;NC_000007.14_17821;NC_000010.11_23646;NC_000012.12_25887;NC_000011.10_25384;hsa-miR-302c-5p;NC_000006.12_15769;hsa-miR-34c-5p;NC_000013.11_27627;hsa-miR-26a-1-3p;hsa-miR-12…
LMO7	NONHSAT219565	0.830189	9.14971e-56	37	hsa-miR-934;NC_000006.12_14671;NC_000013.11_28441;NC_000008.11_19445;hsa-miR-3662;hsa-miR-510-5p;hsa-miR-27b-5p;NC_000003.12_8583;hsa-miR-302a-5p;NC_000011.10_25384;NC_000009.12_21255;hsa-miR-17-5p;hsa-miR-34c-5p;NC_000022.11_36372;NC_000002.12_3238;NC_000003.12_9133;NC_000003.12_7973;NC_000018.10_33480;NC_000012.12_25503;NC_000011.10_25091;hsa-miR-519a-3p;NC_000015.10_30316;hsa-miR-15b-3p;NC_000…
ERRFI1	ENST00000281092	0.27	9.16435e-56	40	NC_000006.12_14671;hsa-miR-372-5p;hsa-miR-30c-1-3p;NC_000008.11_19445;hsa-miR-498;hsa-miR-629-3p;hsa-miR-1298-5p;NC_000021.9_35751;NC_000012.12_25887;hsa-miR-18a-3p;NC_000011.10_25384;NC_000006.12_15769;hsa-miR-17-5p;NC_000006.12_15809;NC_000013.11_27627;NC_000022.11_36372;NC_000005.10_14158;hsa-miR-26a-1-3p;hsa-miR-7-5p;NC_000001.11_3101;NC_000002.12_3238;NC_000003.12_7973;NC_000012.12_25503;NC_…
CTH	ENST00000261530	0.260204	9.43688e-56	40	NC_000013.11_28441;hsa-miR-30c-1-3p;NC_000008.11_19445;NC_000023.11_36905;hsa-miR-371b-3p;NC_000010.11_23303;hsa-miR-92a-1-5p;hsa-miR-629-3p;NC_000003.12_7276;NC_000007.14_17821;hsa-miR-1298-5p;NC_000021.9_35751;hsa-miR-18a-3p;NC_000011.10_25384;NC_000004.12_9892;hsa-miR-302c-5p;hsa-miR-17-5p;NC_000013.11_27627;hsa-miR-1257;NC_000003.12_7973;hsa-miR-519a-3p;hsa-miR-345-5p;hsa-miR-3529-3p;NC_00000…
SLC38A1	ENST00000568777	0.579545	1.16772e-55	38	hsa-miR-934;hsa-miR-33b-3p;hsa-miR-372-5p;NC_000013.11_28441;hsa-miR-30c-1-3p;hsa-miR-371b-3p;hsa-miR-92a-1-5p;NC_000003.12_7276;hsa-miR-629-3p;NC_000012.12_25887;NC_000018.10_33742;NC_000004.12_9892;hsa-miR-302c-5p;NC_000006.12_15769;hsa-miR-34c-5p;hsa-miR-26a-1-3p;hsa-miR-7-5p;NC_000001.11_3101;NC_000002.12_3238;NC_000003.12_7973;NC_000012.12_25503;NC_000011.10_25091;hsa-miR-512-3p;hsa-miR-345-…
RBAK	ENST00000281092	0.33	1.37909e-55	39	hsa-miR-934;NC_000006.12_14671;hsa-miR-372-5p;hsa-miR-30c-1-3p;NC_000010.11_23303;hsa-miR-371b-3p;hsa-miR-92a-1-5p;hsa-miR-629-3p;NC_000021.9_35751;hsa-miR-18a-3p;NC_000011.10_25384;NC_000012.12_26286;NC_000006.12_15809;NC_000022.11_36372;hsa-miR-1257;hsa-miR-7-5p;NC_000001.11_3101;NC_000002.12_3238;NC_000003.12_7973;NC_000012.12_25503;NC_000011.10_25091;hsa-miR-15b-3p;hsa-miR-3529-3p;NC_000003.1…
METTL15	ENST00000261530	0.336735	1.40565e-55	37	hsa-miR-33b-3p;hsa-miR-372-5p;NC_000010.11_23303;hsa-miR-629-3p;NC_000007.14_17821;NC_000021.9_35751;NC_000012.12_25887;hsa-miR-18a-3p;NC_000011.10_25384;NC_000018.10_33742;NC_000004.12_9892;NC_000005.10_11919>NC_000005.10_11920;hsa-miR-302c-5p;hsa-miR-17-5p;hsa-miR-34c-5p;NC_000013.11_27627;NC_000005.10_14158;hsa-miR-1257;hsa-miR-7-5p;NC_000012.12_25503;hsa-miR-519a-3p;hsa-miR-345-5p;hsa-miR-352…
NCKAP1	ENST00000263967	0.356164	1.47178e-55	36	hsa-miR-33b-3p;hsa-miR-372-5p;hsa-miR-30c-1-3p;hsa-miR-629-3p;NC_000007.14_17821;NC_000012.12_25887;NC_000011.10_25384;NC_000004.12_9892;NC_000005.10_11919>NC_000005.10_11920;NC_000009.12_21255;hsa-miR-302c-5p;NC_000006.12_15769;hsa-miR-17-5p;hsa-miR-26a-1-3p;hsa-miR-1257;hsa-miR-7-5p;NC_000002.12_3238;hsa-miR-519a-3p;NC_000003.12_7520;NC_000020.11_35116;NC_000016.10_31157;hsa-miR-296-3p;NT_18760…
ABCC4	ENST00000263967	0.431507	1.57471e-55	40	hsa-miR-33b-3p;hsa-miR-372-5p;hsa-miR-30c-1-3p;hsa-miR-92a-1-5p;hsa-miR-7974;hsa-miR-629-3p;hsa-miR-3662;NC_000007.14_17821;NC_000010.11_23646;NC_000012.12_25887;NC_000018.10_33742;NC_000004.12_9892;NC_000005.10_11919>NC_000005.10_11920;hsa-miR-302c-5p;NC_000006.12_15769;hsa-miR-17-5p;NC_000013.11_27627;hsa-miR-1257;NC_000002.12_3238;NC_000011.10_25091;hsa-miR-15b-3p;hsa-miR-302b-5p;NC_000020.11_…
ARHGAP5	NONHSAT215932	0.487395	1.65577e-55	37	hsa-miR-372-5p;hsa-miR-30c-1-3p;hsa-miR-498;NC_000023.11_36905;NC_000007.14_17821;NC_000021.9_35751;NC_000012.12_25887;NC_000011.10_25384;NC_000006.12_15769;hsa-miR-17-5p;NC_000013.11_27627;hsa-miR-26a-1-3p;hsa-miR-1257;NC_000002.12_3238;NC_000008.11_20037*;NC_000003.12_7973;NC_000011.10_25091;hsa-miR-519a-3p;hsa-miR-15b-3p;NC_000020.11_35116;NC_000003.12_7520;NC_000016.10_31157;NC_000012.12_2641…
FAM63B	ENST00000281092	0.33	1.66304e-55	36	NC_000001.11_2008;hsa-miR-934;hsa-miR-372-5p;hsa-miR-30c-1-3p;hsa-miR-498;hsa-miR-629-3p;NC_000012.12_25887;hsa-miR-18a-3p;NC_000011.10_25384;NC_000005.10_11919>NC_000005.10_11920;NC_000004.12_9892;NC_000012.12_26286;NC_000006.12_15769;hsa-miR-17-5p;NC_000013.11_27627;NC_000022.11_36372;hsa-miR-1257;NC_000003.12_7973;hsa-miR-3529-3p;hsa-miR-515-5p;NC_000003.12_7520;NC_000020.11_35116;NC_000012.12…
ZNF704	ENST00000237264	0.717647	1.73667e-55	41	hsa-miR-33b-3p;NC_000006.12_14671;NC_000013.11_28441;NC_000005.10_12140;hsa-miR-92a-1-5p;hsa-miR-7974;hsa-miR-3662;hsa-miR-510-5p;hsa-miR-27b-5p;NC_000021.9_35751;NC_000012.12_25887;hsa-miR-18a-3p;NC_000011.10_25384;NC_000004.12_9892;hsa-miR-302c-5p;NC_000006.12_15769;hsa-miR-34c-5p;NC_000013.11_27627;NC_000022.11_36372;NC_000022.11_36437;hsa-miR-1257;hsa-miR-26a-1-3p;hsa-miR-7-5p;NC_000001.11_31…
PHLDA1	ENST00000261530	0.321429	1.95188e-55	41	hsa-miR-25-5p;hsa-miR-372-5p;NC_000013.11_28441;hsa-miR-30c-1-3p;NC_000008.11_19445;NC_000010.11_23303;hsa-miR-92a-1-5p;hsa-miR-629-3p;NC_000003.12_7276;NC_000007.14_17821;NC_000010.11_23646;NC_000012.12_25887;hsa-miR-18a-3p;NC_000011.10_25384;NC_000018.10_33742;NC_000005.10_11919>NC_000005.10_11920;hsa-miR-17-5p;NC_000013.11_27627;NC_000022.11_36437;NC_000002.12_3238;NC_000003.12_7973;NC_000012.…
ANK2	NONHSAT224112	0.773333	1.96689e-55	42	hsa-miR-372-5p;hsa-miR-3155a;NC_000013.11_28441;NC_000008.11_19445;NC_000010.11_23303;hsa-miR-92a-1-5p;hsa-miR-629-3p;hsa-miR-3662;NC_000007.14_17821;NC_000003.12_8583;NC_000012.12_25887;NC_000004.12_10500;NC_000006.12_15769;NC_000013.11_27627;NC_000022.11_36372;NC_000022.11_36437;hsa-miR-26a-1-3p;hsa-miR-7-5p;NC_000003.12_9133;hsa-miR-520a-3p;hsa-miR-512-3p;hsa-miR-345-5p;hsa-miR-5585-3p;NC_0000…
DENND2C	NR_033268	0.440367	1.97067e-55	38	hsa-miR-934;hsa-miR-372-5p;hsa-miR-3155a;NC_000013.11_28441;hsa-miR-30c-1-3p;NC_000010.11_23303;hsa-miR-92a-1-5p;NC_000003.12_7276;hsa-miR-302a-5p;NC_000021.9_35751;NC_000003.12_8583;NC_000012.12_25887;NC_000012.12_26286;NC_000006.12_15769;hsa-miR-17-5p;NC_000022.11_36372;hsa-miR-7-5p;NC_000002.12_3238;NC_000003.12_9133;NC_000011.10_25091;hsa-miR-512-3p;hsa-miR-302b-5p;hsa-miR-345-5p;NC_000003.12…
EPRS	ENST00000261530	0.280612	1.99818e-55	36	hsa-miR-372-5p;NC_000013.11_28441;hsa-miR-498;hsa-miR-92a-1-5p;NC_000003.12_7276;NC_000007.14_17821;NC_000010.11_23646;hsa-miR-18a-3p;NC_000011.10_25384;NC_000004.12_9892;NC_000005.10_11919>NC_000005.10_11920;hsa-miR-17-5p;hsa-miR-34c-5p;NC_000006.12_15809;NC_000013.11_27627;hsa-miR-26a-1-3p;NC_000002.12_3238;hsa-miR-519a-3p;NC_000015.10_30316;hsa-miR-3529-3p;NC_000003.12_7520;hsa-miR-517a-3p>hsa…
TMEM106B	ENST00000281092	0.315	2.00528e-55	35	hsa-miR-934;hsa-miR-372-5p;hsa-miR-30c-1-3p;NC_000008.11_19445;hsa-miR-675-5p;hsa-miR-1298-5p;NC_000012.12_25887;hsa-miR-18a-3p;NC_000005.10_11919>NC_000005.10_11920;NC_000004.12_9892;NC_000012.12_26286;NC_000006.12_15769;hsa-miR-34c-5p;NC_000013.11_27627;NC_000022.11_36372;hsa-miR-26a-1-3p;hsa-miR-7-5p;NC_000003.12_7973;hsa-miR-345-5p;NC_000003.12_7520;NC_000020.11_35116;NC_000012.12_26414;hsa-m…
ERN1	ENST00000261530	0.295918	2.31033e-55	43	NC_000006.12_14671;hsa-miR-25-5p;hsa-miR-372-5p;NC_000011.10_24389*;hsa-miR-30c-1-3p;NC_000010.11_23303;hsa-miR-371b-3p;hsa-miR-92a-1-5p;hsa-miR-629-3p;NC_000003.12_7276;NC_000007.14_17821;hsa-miR-1298-5p;NC_000021.9_35751;NC_000010.11_23646;hsa-miR-18a-3p;NC_000012.12_25887;NC_000011.10_25384;NC_000018.10_33742;NC_000005.10_11919>NC_000005.10_11920;hsa-miR-302c-5p;hsa-miR-34c-5p;NC_000022.11_364…
ADAM20	ENST00000281092	0.515	2.49439e-55	44	hsa-miR-934;hsa-miR-33b-3p;NC_000006.12_14671;hsa-miR-372-5p;hsa-miR-30c-1-3p;NC_000010.11_23303;hsa-miR-371b-3p;hsa-miR-92a-1-5p;NC_000021.9_35751;NC_000012.12_25887;hsa-miR-18a-3p;NC_000011.10_25384;NC_000005.10_11919>NC_000005.10_11920;hsa-miR-302c-5p;NC_000012.12_26286;NC_000006.12_15769;hsa-miR-34c-5p;NC_000006.12_15809;NC_000022.11_36372;hsa-miR-1257;hsa-miR-26a-1-3p;hsa-miR-7-5p;NC_000001.…
SLC39A10	ENST00000563635	0.716216	2.63456e-55	38	hsa-miR-934;hsa-miR-33b-3p;NC_000006.12_14671;hsa-miR-372-5p;NC_000013.11_28441;NC_000008.11_19445;hsa-miR-498;NC_000005.10_12588;hsa-miR-518e-5p>hsa-miR-519a-5p>hsa-miR-519b-5p>hsa-miR-519c-5p>hsa-miR-522-5p>hsa-miR-523-5p;hsa-miR-3662;NC_000007.14_17821;NC_000012.12_25887;NC_000011.10_25384;hsa-miR-302c-5p;NC_000006.12_15769;hsa-miR-17-5p;NC_000022.11_36372;NC_000022.11_36437;hsa-miR-26a-1-3p;N…
ADAM20	NONHSAT224112	0.733333	3.09841e-55	40	hsa-miR-371a-5p;hsa-miR-372-5p;hsa-miR-3155a;NC_000013.11_28441;NC_000010.11_23303;hsa-miR-92a-1-5p;hsa-miR-3662;NC_000007.14_17821;NC_000003.12_8583;NC_000012.12_25887;hsa-miR-18a-3p;NC_000004.12_10500;NC_000006.12_15769;NC_000022.11_36372;hsa-miR-26a-1-3p;NC_000022.11_36437;hsa-miR-7-5p;NC_000003.12_9133;hsa-miR-520a-3p;NC_000023.11_38289;hsa-miR-512-3p;hsa-miR-345-5p;hsa-miR-5585-3p;hsa-miR-92…
INHBA	ENST00000263967	0.40411	3.31286e-55	37	hsa-miR-934;hsa-miR-33b-3p;hsa-miR-372-5p;NC_000013.11_28441;hsa-miR-30c-1-3p;hsa-miR-7974;hsa-miR-629-3p;NC_000007.14_17821;NC_000012.12_25887;NC_000004.12_9892;hsa-miR-302c-5p;NC_000006.12_15769;hsa-miR-17-5p;NC_000013.11_27627;hsa-miR-26a-1-3p;hsa-miR-1257;hsa-miR-7-5p;NC_000002.12_3238;NC_000011.10_25091;hsa-miR-519a-3p;hsa-miR-345-5p;NC_000003.12_7520;NC_000016.10_31157;NC_000012.12_26414;NC…
VTI1A	ENST00000568777	0.715909	4.82471e-55	41	hsa-miR-934;hsa-miR-33b-3p;hsa-miR-372-5p;NC_000013.11_28441;hsa-miR-30c-1-3p;hsa-miR-371b-3p;hsa-miR-675-5p;hsa-miR-92a-1-5p;NC_000005.10_12588;hsa-miR-518e-5p>hsa-miR-519a-5p>hsa-miR-519b-5p>hsa-miR-519c-5p>hsa-miR-522-5p>hsa-miR-523-5p;hsa-miR-629-3p;NC_000010.11_23646;NC_000003.12_8583;NC_000012.12_25887;hsa-miR-18a-3p;NC_000004.12_9892;hsa-miR-302c-5p;NC_000006.12_15769;hsa-miR-34c-5p;hsa-mi…
C1orf116	ENST00000261530	0.311224	5.88199e-55	41	hsa-miR-934;NC_000006.12_14671;hsa-miR-25-5p;hsa-miR-372-5p;NC_000013.11_28441;hsa-miR-30c-1-3p;NC_000008.11_19445;hsa-miR-498;NC_000010.11_23303;hsa-miR-92a-1-5p;NC_000007.14_17821;NC_000021.9_35751;NC_000011.10_25384;NC_000005.10_11919>NC_000005.10_11920;hsa-miR-34c-5p;hsa-miR-26a-1-3p;NC_000005.10_14158;NC_000001.11_3101;NC_000002.12_3238;NC_000012.12_25503;NC_000015.10_30316;hsa-miR-345-5p;hs…
RPS6KA2	NR_033268	0.458716	7.24092e-55	38	hsa-miR-372-5p;hsa-miR-3155a;hsa-miR-30c-1-3p;NC_000023.11_36905;NC_000010.11_23303;hsa-miR-92a-1-5p;hsa-miR-518b;hsa-miR-7974;hsa-miR-629-3p;NC_000003.12_7276;NC_000007.14_17821;hsa-miR-1298-5p;NC_000021.9_35751;NC_000003.12_8583;hsa-miR-18a-3p;NC_000012.12_25887;hsa-miR-302c-5p;NC_000012.12_26286;NC_000006.12_15769;hsa-miR-17-5p;hsa-miR-26a-1-3p;hsa-miR-512-3p;NC_000020.11_35116;NC_000003.12_75…
SLC38A2	ENST00000237264	0.541176	7.53044e-55	35	hsa-miR-33b-3p;NC_000013.11_28441;NC_000008.11_19445;hsa-miR-7974;hsa-miR-3662;hsa-miR-27b-5p;NC_000021.9_35751;NC_000012.12_25887;NC_000011.10_25384;NC_000004.12_9892;hsa-miR-302c-5p;NC_000006.12_15769;NC_000006.12_15809;NC_000013.11_27627;NC_000022.11_36372;NC_000022.11_36437;hsa-miR-26a-1-3p;hsa-miR-7-5p;NC_000001.11_3101;NC_000002.12_3238;NC_000018.10_33480;NC_000018.10_33037;hsa-miR-548d-3p;…
ZNF160	ENST00000261530	0.270408	7.80086e-55	37	NC_000006.12_14671;hsa-miR-372-5p;hsa-miR-30c-1-3p;NC_000008.11_19445;hsa-miR-498;NC_000010.11_23303;hsa-miR-629-3p;NC_000007.14_17821;NC_000012.12_25887;hsa-miR-18a-3p;NC_000011.10_25384;NC_000018.10_33742;NC_000004.12_9892;hsa-miR-17-5p;hsa-miR-26a-1-3p;NC_000005.10_14158;hsa-miR-7-5p;NC_000001.11_3101;NC_000003.12_7973;NC_000015.10_30316;hsa-miR-345-5p;hsa-miR-3529-3p;NC_000012.12_26414;hsa-mi…
ABCC3	NR_033268	0.366972	8.36933e-55	37	hsa-miR-934;hsa-miR-371a-5p;hsa-miR-3155a;hsa-miR-30c-1-3p;NC_000023.11_36905;NC_000010.11_23303;hsa-miR-371b-3p;hsa-miR-92a-1-5p;hsa-miR-7974;hsa-miR-629-3p;NC_000007.14_17821;hsa-miR-302a-5p;hsa-miR-510-5p;NC_000003.12_8583;hsa-miR-1298-5p;hsa-miR-18a-3p;NC_000010.11_23646;NC_000021.9_35751;hsa-miR-17-5p;NC_000005.10_14158;hsa-miR-7-5p;NC_000001.11_3101;NC_000002.12_3238;NC_000011.10_25091;hsa-…
SLC38A1	NONHSAT215932	0.529412	1.02011e-54	39	hsa-miR-934;hsa-miR-33b-3p;hsa-miR-372-5p;NC_000013.11_28441;hsa-miR-30c-1-3p;NC_000023.11_36905;hsa-miR-92a-1-5p;hsa-miR-7974;NC_000012.12_25887;NC_000011.10_25384;hsa-miR-302c-5p;NC_000006.12_15769;hsa-miR-17-5p;hsa-miR-34c-5p;NC_000013.11_27627;hsa-miR-1257;hsa-miR-26a-1-3p;NC_000002.12_3238;NC_000003.12_7973;NC_000011.10_25091;hsa-miR-519a-3p;NC_000015.10_30316;hsa-miR-15b-3p;NC_000003.12_752…
MTMR9	ENST00000563635	0.662162	1.27088e-54	38	hsa-miR-33b-3p;hsa-miR-372-5p;NC_000013.11_28441;NC_000008.11_19445;hsa-miR-498;NC_000005.10_12588;hsa-miR-518e-5p>hsa-miR-519a-5p>hsa-miR-519b-5p>hsa-miR-519c-5p>hsa-miR-522-5p>hsa-miR-523-5p;NC_000003.12_7276;hsa-miR-3662;NC_000021.9_35751;NC_000003.12_8583;NC_000012.12_25887;NC_000011.10_25384;NC_000004.12_9892;hsa-miR-302c-5p;hsa-miR-17-5p;NC_000022.11_36372;hsa-miR-26a-1-3p;NC_000001.11_3101…
NIPAL2	ENST00000261530	0.265306	1.37949e-54	36	NC_000001.11_2008;hsa-miR-934;hsa-miR-33b-3p;hsa-miR-25-5p;hsa-miR-372-5p;hsa-miR-30c-1-3p;NC_000008.11_19445;NC_000023.11_36905;hsa-miR-629-3p;NC_000012.12_25887;NC_000011.10_25384;NC_000018.10_33742;NC_000004.12_9892;NC_000013.11_27627;hsa-miR-26a-1-3p;hsa-miR-7-5p;NC_000001.11_3101;NC_000003.12_7973;hsa-miR-345-5p;hsa-miR-515-5p;NC_000020.11_35116;hsa-miR-517a-3p>hsa-miR-517b-3p;NC_000018.10_3…
CALCOCO2	ENST00000281092	0.2	1.39892e-54	34	NC_000008.11_19445;NC_000010.11_23303;hsa-miR-675-5p;hsa-miR-92a-1-5p;hsa-miR-629-3p;hsa-miR-27b-5p;NC_000012.12_25887;hsa-miR-18a-3p;NC_000011.10_25384;NC_000005.10_11919>NC_000005.10_11920;hsa-miR-302c-5p;hsa-miR-17-5p;hsa-miR-34c-5p;NC_000022.11_36372;NC_000005.10_14158;hsa-miR-26a-1-3p;hsa-miR-7-5p;NC_000002.12_3238;NC_000008.11_20037*;hsa-miR-3529-3p;NC_000016.10_31157;NC_000012.12_26414;NC_…
ZBTB21	ENST00000281092	0.33	1.39892e-54	34	NC_000001.11_2008;hsa-miR-30c-1-3p;NC_000008.11_19445;hsa-miR-498;hsa-miR-629-3p;NC_000012.12_25887;NC_000011.10_25384;NC_000004.12_9892;NC_000006.12_15769;hsa-miR-17-5p;hsa-miR-34c-5p;NC_000013.11_27627;NC_000022.11_36372;hsa-miR-26a-1-3p;hsa-miR-7-5p;NC_000008.11_20037*;NC_000011.10_25091;hsa-miR-345-5p;hsa-miR-3529-3p;hsa-miR-515-5p;NC_000020.11_35116;NC_000012.12_26414;hsa-miR-548d-3p;hsa-miR…
AUTS2	NR_003587	0.691489	1.4516e-54	37	NC_000009.12_21574;hsa-miR-371a-5p;hsa-miR-3155a;NC_000005.10_12140;NC_000023.11_36905;NC_000010.11_23303;hsa-miR-92a-1-5p;hsa-miR-7974;NC_000007.14_17821;hsa-miR-302a-5p;hsa-miR-510-5p;NC_000003.12_8583;hsa-miR-1298-5p;NC_000010.11_23646;NC_000021.9_35751;NC_000004.12_10500;NC_000004.12_9958;NC_000005.10_11919>NC_000005.10_11920;NC_000006.12_15769;hsa-miR-34c-5p;NC_000005.10_14158;hsa-miR-7-5p;N…
TMEM106B	ENST00000261530	0.270408	1.53207e-54	35	hsa-miR-934;hsa-miR-372-5p;hsa-miR-30c-1-3p;NC_000008.11_19445;NC_000003.12_7276;NC_000007.14_17821;hsa-miR-1298-5p;NC_000012.12_25887;hsa-miR-18a-3p;NC_000018.10_33742;NC_000005.10_11919>NC_000005.10_11920;NC_000004.12_9892;hsa-miR-34c-5p;NC_000013.11_27627;hsa-miR-26a-1-3p;hsa-miR-7-5p;NC_000003.12_7973;NC_000015.10_30316;hsa-miR-345-5p;NC_000003.12_7520;NC_000020.11_35116;NC_000012.12_26414;hs…
ATP2B4	NONHSAT215932	0.445378	1.5512e-54	40	hsa-miR-934;hsa-miR-372-5p;NC_000013.11_28441;hsa-miR-30c-1-3p;hsa-miR-498;NC_000023.11_36905;NC_000010.11_23303;hsa-miR-92a-1-5p;hsa-miR-7974;NC_000007.14_17821;NC_000010.11_23646;NC_000021.9_35751;NC_000012.12_25887;NC_000011.10_25384;NC_000005.10_11919>NC_000005.10_11920;NC_000012.12_26286;NC_000006.12_15769;hsa-miR-17-5p;hsa-miR-34c-5p;NC_000013.11_27627;NC_000005.10_14158;hsa-miR-1257;hsa-mi…
LMO7	NR_038921	0.55	1.5512e-54	40	NC_000001.11_2008;NC_000013.11_28441;hsa-miR-30c-1-3p;NC_000008.11_19445;hsa-miR-7974;hsa-miR-3662;NC_000007.14_17821;hsa-miR-27b-5p;NC_000012.12_25887;NC_000011.10_25384;NC_000009.12_21255;hsa-miR-302c-5p;NC_000012.12_26286;NC_000006.12_15769;hsa-miR-17-5p;NC_000013.11_27627;NC_000022.11_36372;hsa-miR-1257;hsa-miR-26a-1-3p;NC_000001.11_3101;NC_000002.12_3238;NC_000003.12_7973;NC_000015.10_30316;…
LMO7	NONHSAT215932	0.504202	1.5512e-54	40	hsa-miR-934;hsa-miR-33b-3p;NC_000013.11_28441;hsa-miR-30c-1-3p;hsa-miR-7974;NC_000007.14_17821;NC_000010.11_23646;NC_000012.12_25887;NC_000011.10_25384;hsa-miR-302c-5p;NC_000012.12_26286;NC_000006.12_15769;hsa-miR-17-5p;hsa-miR-34c-5p;NC_000013.11_27627;hsa-miR-26a-1-3p;hsa-miR-1257;NC_000002.12_3238;NC_000003.12_9133;NC_000003.12_7973;NC_000011.10_25091;hsa-miR-519a-3p;NC_000015.10_30316;hsa-miR…
LMO7	ENST00000237264	0.529412	1.5512e-54	40	NC_000001.11_2008;hsa-miR-33b-3p;NC_000006.12_14671;NC_000013.11_28441;NC_000005.10_12140;NC_000008.11_19445;hsa-miR-7974;hsa-miR-3662;hsa-miR-510-5p;hsa-miR-27b-5p;NC_000012.12_25887;hsa-miR-18a-3p;NC_000011.10_25384;hsa-miR-302c-5p;NC_000006.12_15769;hsa-miR-34c-5p;NC_000013.11_27627;NC_000022.11_36372;NC_000022.11_36437;hsa-miR-1257;hsa-miR-26a-1-3p;hsa-miR-7-5p;NC_000001.11_3101;NC_000002.12_…
ZNF704	ENST00000568777	0.693182	1.83732e-54	39	hsa-miR-934;hsa-miR-33b-3p;NC_000013.11_28441;hsa-miR-30c-1-3p;hsa-miR-92a-1-5p;NC_000003.12_7276;hsa-miR-629-3p;NC_000010.11_23646;NC_000003.12_8583;NC_000012.12_25887;hsa-miR-18a-3p;NC_000018.10_33742;NC_000004.12_9892;hsa-miR-302c-5p;NC_000006.12_15769;hsa-miR-34c-5p;hsa-miR-26a-1-3p;hsa-miR-7-5p;NC_000001.11_3101;NC_000002.12_3238;NC_000003.12_7973;NC_000012.12_25503;NC_000011.10_25091;hsa-mi…
CHD9	ENST00000432045	0.675	1.95182e-54	34	NC_000006.12_14671;hsa-miR-30c-1-3p;hsa-miR-498;NC_000003.12_7276;hsa-miR-629-3p;NC_000012.12_25887;hsa-miR-18a-3p;NC_000011.10_25384;NC_000004.12_9892;NC_000006.12_15769;hsa-miR-17-5p;NC_000022.11_36372;hsa-miR-26a-1-3p;hsa-miR-1257;hsa-miR-7-5p;NC_000008.11_20037*;NC_000011.10_25091;hsa-miR-515-5p;NC_000020.11_35116;hsa-miR-548d-3p;hsa-miR-296-3p;NT_187601.1_39493>NC_000014.9_29213;hsa-miR-20a-…
VTI1A	NR_034072	0.793651	2.49746e-54	38	hsa-miR-934;hsa-miR-1323;hsa-miR-25-5p;hsa-miR-372-5p;NC_000013.11_28441;hsa-miR-30c-1-3p;hsa-miR-371b-3p;hsa-miR-7974;hsa-miR-3662;hsa-miR-510-5p;hsa-miR-302a-5p;NC_000012.12_25887;NC_000004.12_10500;NC_000011.10_25384;hsa-miR-302c-5p;NC_000006.12_15769;hsa-miR-17-5p;hsa-miR-26a-1-3p;hsa-miR-7-5p;NC_000002.12_3238;NC_000012.12_25503;hsa-miR-512-3p;hsa-miR-345-5p;hsa-miR-3529-3p;NC_000003.12_7520…
HIVEP2	ENST00000563635	0.608108	2.72163e-54	38	hsa-miR-934;hsa-miR-372-5p;hsa-miR-3155a;NC_000013.11_28441;hsa-miR-498;NC_000008.11_19445;NC_000003.12_8135;NC_000003.12_7276;hsa-miR-3662;NC_000007.14_17821;NC_000003.12_8583;NC_000012.12_25887;hsa-miR-18a-3p;NC_000021.9_35751;NC_000011.10_25384;NC_000004.12_9892;hsa-miR-302c-5p;NC_000006.12_15769;hsa-miR-17-5p;NC_000022.11_36372;NC_000022.11_36437;hsa-miR-26a-1-3p;NC_000001.11_3101;NC_000008.1…
CPEB2	ENST00000568777	0.534091	2.72163e-54	38	hsa-miR-934;hsa-miR-33b-3p;NC_000013.11_28441;hsa-miR-30c-1-3p;hsa-miR-371b-3p;hsa-miR-675-5p;hsa-miR-92a-1-5p;NC_000005.10_12588;hsa-miR-518e-5p>hsa-miR-519a-5p>hsa-miR-519b-5p>hsa-miR-519c-5p>hsa-miR-522-5p>hsa-miR-523-5p;hsa-miR-629-3p;NC_000010.11_23646;NC_000003.12_8583;hsa-miR-18a-3p;NC_000004.12_9892;hsa-miR-302c-5p;hsa-miR-34c-5p;hsa-miR-26a-1-3p;hsa-miR-7-5p;NC_000001.11_3101;NC_000002.1…
NCKAP1	NONHSAT215932	0.428571	2.92574e-54	35	hsa-miR-33b-3p;hsa-miR-372-5p;hsa-miR-30c-1-3p;NC_000023.11_36905;NC_000007.14_17821;NC_000012.12_25887;NC_000011.10_25384;NC_000005.10_11919>NC_000005.10_11920;hsa-miR-302c-5p;NC_000012.12_26286;NC_000006.12_15769;hsa-miR-17-5p;hsa-miR-34c-5p;hsa-miR-26a-1-3p;hsa-miR-1257;NC_000002.12_3238;NC_000008.11_20037*;NC_000003.12_7973;hsa-miR-519a-3p;NC_000003.12_7520;NC_000020.11_35116;NC_000016.10_311…
HIPK3	ENST00000263967	0.417808	3.16946e-54	38	hsa-miR-372-5p;hsa-miR-30c-1-3p;hsa-miR-498;hsa-miR-92a-1-5p;hsa-miR-7974;NC_000012.12_25887;NC_000011.10_25384;NC_000005.10_11919>NC_000005.10_11920;NC_000004.12_9892;NC_000006.12_15769;hsa-miR-17-5p;NC_000013.11_27627;hsa-miR-1257;hsa-miR-7-5p;NC_000002.12_3238;NC_000011.10_25091;hsa-miR-519a-3p;NC_000015.10_30316;hsa-miR-15b-3p;NC_000016.10_31157;NC_000012.12_26414;NC_000018.10_33037;NT_187601…
RNF14	ENST00000263967	0.438356	3.16946e-54	38	hsa-miR-934;hsa-miR-33b-3p;hsa-miR-372-5p;NC_000013.11_28441;hsa-miR-498;hsa-miR-371b-3p;hsa-miR-92a-1-5p;hsa-miR-3662;NC_000010.11_23646;NC_000012.12_25887;NC_000004.12_10500;NC_000018.10_33742;hsa-miR-302c-5p;NC_000006.12_15769;hsa-miR-17-5p;NC_000013.11_27627;hsa-miR-26a-1-3p;hsa-miR-1257;NC_000022.11_36437;hsa-miR-7-5p;NC_000002.12_3238;NC_000011.10_25091;hsa-miR-15b-3p;NC_000012.12_26414;NC_…
SLCO4A1	ENST00000261530	0.255102	3.43809e-54	40	hsa-miR-33b-3p;NC_000006.12_14671;hsa-miR-25-5p;hsa-miR-30c-1-3p;NC_000008.11_19445;NC_000023.11_36905;hsa-miR-371b-3p;hsa-miR-498;hsa-miR-92a-1-5p;NC_000003.12_7276;hsa-miR-629-3p;hsa-miR-27b-5p;NC_000021.9_35751;hsa-miR-18a-3p;NC_000011.10_25384;NC_000018.10_33742;NC_000005.10_11919>NC_000005.10_11920;hsa-miR-17-5p;hsa-miR-34c-5p;NC_000022.11_36437;NC_000005.10_14158;hsa-miR-1257;hsa-miR-7-5p;N…
LMO7	NR_033268	0.477064	3.68399e-54	42	hsa-miR-934;hsa-miR-371a-5p;hsa-miR-3155a;NC_000013.11_28441;hsa-miR-30c-1-3p;hsa-miR-7974;NC_000003.12_7276;NC_000007.14_17821;hsa-miR-510-5p;hsa-miR-302a-5p;NC_000003.12_8583;NC_000010.11_23646;hsa-miR-18a-3p;NC_000012.12_25887;hsa-miR-302c-5p;NC_000012.12_26286;NC_000006.12_15769;hsa-miR-17-5p;NC_000022.11_36372;hsa-miR-26a-1-3p;hsa-miR-7-5p;NC_000001.11_3101;NC_000002.12_3238;NC_000003.12_913…
GFPT1	NONHSAT224112	0.6	3.69625e-54	39	hsa-miR-371a-5p;hsa-miR-372-5p;hsa-miR-3155a;NC_000008.11_19445;hsa-miR-498;hsa-miR-92a-1-5p;hsa-miR-629-3p;hsa-miR-3662;NC_000007.14_17821;NC_000003.12_8583;NC_000012.12_25887;hsa-miR-18a-3p;NC_000006.12_15769;NC_000013.11_27627;NC_000022.11_36372;NC_000022.11_36437;hsa-miR-7-5p;NC_000003.12_9133;hsa-miR-520a-3p;hsa-miR-512-3p;NC_000007.14_16719;NC_000016.10_31157;NC_000018.10_33037;hsa-let-7c-5…
KLHL5	NR_033268	0.513761	4.06248e-54	39	hsa-miR-934;hsa-miR-372-5p;NC_000013.11_28441;hsa-miR-30c-1-3p;NC_000023.11_36905;hsa-miR-518e-5p>hsa-miR-519a-5p>hsa-miR-519b-5p>hsa-miR-519c-5p>hsa-miR-522-5p>hsa-miR-523-5p;hsa-miR-629-3p;NC_000003.12_7276;hsa-miR-1298-5p;hsa-miR-302a-5p;NC_000021.9_35751;NC_000003.12_8583;NC_000010.11_23646;NC_000012.12_25887;hsa-miR-302c-5p;NC_000006.12_15769;hsa-miR-17-5p;NC_000022.11_36372;NC_000005.10_141…
AUTS2	ENST00000261530	0.423469	4.0862e-54	45	hsa-miR-934;hsa-miR-33b-3p;hsa-miR-372-5p;hsa-miR-30c-1-3p;NC_000023.11_36905;NC_000010.11_23303;hsa-miR-92a-1-5p;NC_000003.12_7276;NC_000007.14_17821;hsa-miR-27b-5p;hsa-miR-1298-5p;NC_000021.9_35751;NC_000010.11_23646;hsa-miR-18a-3p;NC_000012.12_25887;NC_000011.10_25384;NC_000005.10_11919>NC_000005.10_11920;hsa-miR-302c-5p;hsa-miR-34c-5p;NC_000013.11_27627;NC_000005.10_14158;NC_000022.11_36437;h…
DNAJC10	NONHSAT215932	0.478992	4.64935e-54	36	hsa-miR-934;hsa-miR-372-5p;NC_000013.11_28441;hsa-miR-30c-1-3p;hsa-miR-498;hsa-miR-92a-1-5p;hsa-miR-7974;NC_000007.14_17821;NC_000012.12_25887;NC_000011.10_25384;hsa-miR-302c-5p;NC_000006.12_15769;hsa-miR-17-5p;hsa-miR-34c-5p;NC_000013.11_27627;NC_000005.10_14158;hsa-miR-1257;hsa-miR-26a-1-3p;NC_000003.12_7973;hsa-miR-519a-3p;NC_000015.10_30316;NC_000020.11_35116;NC_000016.10_31157;NC_000012.12_2…
XIAP	ENST00000261530	0.443878	4.71982e-54	42	hsa-miR-934;hsa-miR-25-5p;hsa-miR-372-5p;NC_000013.11_28441;hsa-miR-30c-1-3p;NC_000008.11_19445;hsa-miR-498;NC_000010.11_23303;NC_000003.12_7276;NC_000007.14_17821;hsa-miR-629-3p;NC_000010.11_23646;NC_000021.9_35751;NC_000012.12_25887;hsa-miR-18a-3p;NC_000011.10_25384;NC_000004.12_9892;hsa-miR-302c-5p;hsa-miR-17-5p;hsa-miR-34c-5p;NC_000013.11_27627;hsa-miR-26a-1-3p;hsa-miR-1257;hsa-miR-7-5p;NC_00…
CREBRF	ENST00000237264	0.576471	6.0845e-54	38	NC_000001.11_2008;NC_000013.11_28441;NC_000005.10_12140;NC_000008.11_19445;NC_000005.10_12588;hsa-miR-7974;hsa-miR-27b-5p;NC_000012.12_25887;hsa-miR-18a-3p;NC_000011.10_25384;NC_000004.12_9892;hsa-miR-302c-5p;NC_000006.12_15769;hsa-miR-34c-5p;NC_000013.11_27627;NC_000022.11_36372;hsa-miR-26a-1-3p;hsa-miR-1257;hsa-miR-7-5p;NC_000001.11_3101;NC_000002.12_3238;hsa-miR-519a-3p;NC_000020.11_35116;NC_0…
TTN	ENST00000568777	0.795455	7.02004e-54	39	NC_000001.11_2008;hsa-miR-934;hsa-miR-33b-3p;hsa-miR-372-5p;NC_000013.11_28441;hsa-miR-30c-1-3p;hsa-miR-371b-3p;hsa-miR-92a-1-5p;NC_000003.12_7276;hsa-miR-629-3p;NC_000012.12_25887;hsa-miR-18a-3p;NC_000018.10_33742;NC_000004.12_9892;hsa-miR-302c-5p;NC_000006.12_15769;hsa-miR-34c-5p;hsa-miR-26a-1-3p;hsa-miR-7-5p;NC_000001.11_3101;NC_000002.12_3238;NC_000003.12_7973;NC_000011.10_25091;hsa-miR-345-5…
GRB10	ENST00000261530	0.346939	8.07445e-54	43	hsa-miR-33b-3p;NC_000006.12_14671;hsa-miR-25-5p;hsa-miR-372-5p;hsa-miR-30c-1-3p;NC_000023.11_36905;NC_000010.11_23303;hsa-miR-92a-1-5p;hsa-miR-27b-5p;NC_000010.11_23646;NC_000012.12_25887;hsa-miR-18a-3p;NC_000011.10_25384;NC_000005.10_11919>NC_000005.10_11920;hsa-miR-302c-5p;hsa-miR-34c-5p;NC_000006.12_15809;NC_000005.10_14158;NC_000022.11_36437;hsa-miR-1257;hsa-miR-26a-1-3p;hsa-miR-7-5p;NC_00000…
TNFSF15	NONHSAT224112	0.613333	8.30385e-54	38	hsa-miR-371a-5p;hsa-miR-372-5p;NC_000013.11_28441;NC_000008.11_19445;NC_000010.11_23303;hsa-miR-92a-1-5p;hsa-miR-629-3p;hsa-miR-3662;NC_000003.12_8583;hsa-miR-18a-3p;NC_000004.12_10500;NC_000006.12_15769;NC_000022.11_36372;hsa-miR-26a-1-3p;NC_000022.11_36437;hsa-miR-7-5p;hsa-miR-520a-3p;NC_000023.11_38289;hsa-miR-512-3p;hsa-miR-345-5p;hsa-miR-5585-3p;hsa-miR-92a-3p;NC_000007.14_16719;NC_000016.10…
HSPA13	ENST00000281092	0.285	8.72862e-54	37	NC_000006.12_14671;NC_000008.11_19445;NC_000010.11_23303;hsa-miR-92a-1-5p;NC_000012.12_25887;NC_000021.9_35751;hsa-miR-18a-3p;NC_000004.12_9892;NC_000012.12_26286;NC_000006.12_15769;hsa-miR-34c-5p;NC_000013.11_27627;NC_000022.11_36372;hsa-miR-1257;hsa-miR-7-5p;NC_000001.11_3101;NC_000002.12_3238;NC_000008.11_20037*;NC_000003.12_7973;hsa-miR-15b-3p;hsa-miR-3529-3p;hsa-miR-515-5p;NC_000003.12_7520;…
PNPLA8	ENST00000263967	0.376712	1.03834e-53	37	hsa-miR-33b-3p;hsa-miR-372-5p;NC_000013.11_28441;hsa-miR-30c-1-3p;hsa-miR-498;hsa-miR-371b-3p;hsa-miR-7974;hsa-miR-3662;NC_000010.11_23646;NC_000011.10_25384;NC_000018.10_33742;hsa-miR-302c-5p;hsa-miR-17-5p;NC_000013.11_27627;NC_000022.11_36437;NC_000002.12_3238;NC_000011.10_25091;hsa-miR-519a-3p;hsa-miR-15b-3p;hsa-miR-302b-5p;hsa-miR-345-5p;NC_000003.12_7520;NC_000016.10_31157;NC_000018.10_33037…
TAOK3	ENST00000281092	0.265	1.06797e-53	35	NC_000006.12_14671;hsa-miR-1323;hsa-miR-30c-1-3p;hsa-miR-675-5p;hsa-miR-92a-1-5p;hsa-miR-1298-5p;NC_000012.12_25887;NC_000011.10_25384;NC_000004.12_9892;NC_000012.12_26286;hsa-miR-17-5p;NC_000013.11_27627;NC_000022.11_36372;hsa-miR-1257;hsa-miR-7-5p;NC_000002.12_3238;NC_000008.11_20037*;NC_000012.12_25503;NC_000011.10_25091;hsa-miR-15b-3p;hsa-miR-515-5p;hsa-miR-517a-3p>hsa-miR-517b-3p;NC_000016.1…
AUTS2	NONHSAT165427	0.835821	1.16077e-53	38	hsa-miR-934;hsa-miR-372-5p;hsa-miR-3155a;NC_000005.10_12140;NC_000023.11_36905;hsa-miR-7974;hsa-miR-518e-5p>hsa-miR-519a-5p>hsa-miR-519b-5p>hsa-miR-519c-5p>hsa-miR-522-5p>hsa-miR-523-5p;hsa-miR-3662;hsa-miR-1298-5p;hsa-miR-302a-5p;NC_000010.11_23646;NC_000012.12_25887;NC_000004.12_9958;NC_000011.10_25384;NC_000006.12_15769;hsa-miR-34c-5p;NC_000022.11_36437;NC_000005.10_14158;hsa-miR-26a-1-3p;NC_0…
SLC4A5	ENST00000281092	0.23	1.31126e-53	34	hsa-miR-33b-3p;hsa-miR-30c-1-3p;NC_000008.11_19445;hsa-miR-498;hsa-miR-629-3p;NC_000012.12_25887;hsa-miR-18a-3p;NC_000011.10_25384;NC_000005.10_11919>NC_000005.10_11920;NC_000006.12_15769;hsa-miR-17-5p;hsa-miR-34c-5p;hsa-miR-7-5p;NC_000001.11_3101;NC_000008.11_20037*;NC_000003.12_7973;NC_000011.10_25091;hsa-miR-345-5p;hsa-miR-3529-3p;hsa-miR-515-5p;NC_000020.11_35116;NC_000018.10_33037;hsa-miR-54…
NCOA7	NR_033268	0.541284	1.72802e-53	41	hsa-miR-934;hsa-miR-371a-5p;hsa-miR-372-5p;NC_000013.11_28441;NC_000009.12_20733;hsa-miR-30c-1-3p;NC_000023.11_36905;NC_000010.11_23303;hsa-miR-371b-3p;hsa-miR-92a-1-5p;hsa-miR-518e-5p>hsa-miR-519a-5p>hsa-miR-519b-5p>hsa-miR-519c-5p>hsa-miR-522-5p>hsa-miR-523-5p;hsa-miR-629-3p;hsa-miR-510-5p;hsa-miR-302a-5p;NC_000010.11_23646;NC_000012.12_25887;hsa-miR-18a-3p;hsa-miR-302c-5p;NC_000012.12_26286;hs…
KLHL28	ENST00000432045	0.6125	2.03143e-53	32	NC_000006.12_14671;hsa-miR-25-5p;hsa-miR-372-5p;hsa-miR-30c-1-3p;hsa-miR-498;NC_000008.11_19445;hsa-miR-629-3p;NC_000012.12_25887;NC_000011.10_25384;NC_000004.12_9892;hsa-miR-17-5p;NC_000022.11_36372;hsa-miR-1257;hsa-miR-7-5p;hsa-miR-515-5p;NC_000003.12_7520;NC_000020.11_35116;NC_000012.12_26721;hsa-miR-296-3p;NT_187601.1_39493>NC_000014.9_29213;hsa-miR-20a-5p;hsa-miR-302b-3p;hsa-miR-3143;hsa-miR…
NCKAP1	ENST00000432045	0.5625	2.03143e-53	32	hsa-miR-372-5p;hsa-miR-30c-1-3p;NC_000008.11_19445;hsa-miR-629-3p;NC_000012.12_25887;NC_000011.10_25384;NC_000004.12_9892;NC_000009.12_21255;NC_000006.12_15769;hsa-miR-17-5p;hsa-miR-34c-5p;NC_000022.11_36372;hsa-miR-26a-1-3p;hsa-miR-1257;hsa-miR-7-5p;NC_000008.11_20037*;hsa-miR-515-5p;NC_000003.12_7520;NC_000020.11_35116;hsa-miR-296-3p;NT_187601.1_39493>NC_000014.9_29213;hsa-miR-20a-5p;hsa-miR-30…
LCOR	lnc-POTED-16:1	0.730159	2.29053e-53	33	hsa-miR-1323;hsa-miR-372-5p;NC_000008.11_19445;NC_000010.11_23303;NC_000007.14_17821;hsa-miR-27b-5p;NC_000012.12_25887;NC_000011.10_25384;NC_000004.12_9892;NC_000012.12_26286;NC_000006.12_15769;hsa-miR-17-5p;hsa-miR-1257;hsa-miR-7-5p;NC_000011.10_25091;hsa-miR-519a-3p;hsa-miR-15b-3p;hsa-miR-3529-3p;hsa-miR-515-5p;NC_000020.11_35116;NC_000003.12_7520;NC_000018.10_33037;hsa-miR-548d-3p;hsa-miR-302b…
CPEB2	NR_038921	0.53	2.68453e-53	39	hsa-miR-25-5p;NC_000013.11_28441;hsa-miR-30c-1-3p;NC_000008.11_19445;hsa-miR-371b-3p;NC_000005.10_12588;hsa-miR-7974;hsa-miR-518e-5p>hsa-miR-519a-5p>hsa-miR-519b-5p>hsa-miR-519c-5p>hsa-miR-522-5p>hsa-miR-523-5p;hsa-miR-3662;NC_000007.14_17821;NC_000011.10_25384;NC_000004.12_9892;NC_000009.12_21255;hsa-miR-302c-5p;hsa-miR-17-5p;NC_000006.12_15809;NC_000022.11_36372;hsa-miR-26a-1-3p;NC_000001.11_31…
ZNF704	NR_038921	0.73	2.92383e-53	40	NC_000013.11_28441;hsa-miR-30c-1-3p;hsa-miR-7974;hsa-miR-3662;NC_000007.14_17821;hsa-miR-27b-5p;NC_000021.9_35751;NC_000012.12_25887;NC_000011.10_25384;NC_000004.12_9892;hsa-miR-302c-5p;NC_000012.12_26286;NC_000006.12_15769;hsa-miR-17-5p;NC_000013.11_27627;NC_000022.11_36372;hsa-miR-26a-1-3p;hsa-miR-1257;NC_000001.11_3101;NC_000002.12_3238;NC_000003.12_7973;NC_000015.10_30316;hsa-miR-512-3p;NC_00…
TTBK2	ENST00000261530	0.413265	2.94574e-53	42	hsa-miR-934;hsa-miR-33b-3p;hsa-miR-372-5p;hsa-miR-30c-1-3p;NC_000008.11_19445;NC_000023.11_36905;NC_000010.11_23303;hsa-miR-371b-3p;hsa-miR-92a-1-5p;NC_000003.12_7276;NC_000007.14_17821;hsa-miR-27b-5p;NC_000012.12_25887;hsa-miR-18a-3p;NC_000011.10_25384;NC_000005.10_11919>NC_000005.10_11920;hsa-miR-302c-5p;hsa-miR-34c-5p;NC_000022.11_36437;hsa-miR-1257;NC_000005.10_14158;hsa-miR-26a-1-3p;hsa-miR-…
ZNF704	NONHSAT224112	0.72	3.03056e-53	39	NC_000013.11_28441;hsa-miR-92a-1-5p;hsa-miR-629-3p;hsa-miR-3662;NC_000007.14_17821;NC_000003.12_8583;NC_000012.12_25887;hsa-miR-18a-3p;NC_000004.12_10500;NC_000006.12_15769;NC_000013.11_27627;NC_000022.11_36372;hsa-miR-26a-1-3p;NC_000022.11_36437;hsa-miR-7-5p;NC_000003.12_9133;hsa-miR-512-3p;hsa-miR-345-5p;hsa-miR-5585-3p;hsa-miR-92a-3p;NC_000020.11_35116;NC_000016.10_31157;NC_000018.10_33037;hsa…
HIPK3	ENST00000237264	0.588235	3.0345e-53	37	NC_000006.12_14671;NC_000008.11_19445;NC_000005.10_12588;hsa-miR-675-5p;hsa-miR-92a-1-5p;hsa-miR-7974;hsa-miR-518e-5p>hsa-miR-519a-5p>hsa-miR-519b-5p>hsa-miR-519c-5p>hsa-miR-522-5p>hsa-miR-523-5p;NC_000021.9_35751;NC_000012.12_25887;hsa-miR-18a-3p;NC_000011.10_25384;NC_000005.10_11919>NC_000005.10_11920;NC_000004.12_9892;NC_000006.12_15769;hsa-miR-34c-5p;NC_000006.12_15809;NC_000013.11_27627;NC_0…
RHBDD1	NONHSAT224112	0.573333	3.03947e-53	37	hsa-miR-371a-5p;NC_000013.11_28441;NC_000008.11_19445;hsa-miR-92a-1-5p;hsa-miR-629-3p;hsa-miR-3662;NC_000007.14_17821;hsa-miR-18a-3p;NC_000006.12_15769;NC_000013.11_27627;NC_000022.11_36372;hsa-miR-26a-1-3p;NC_000022.11_36437;hsa-miR-7-5p;NC_000003.12_9133;hsa-miR-520a-3p;NC_000023.11_38289;hsa-miR-5585-3p;hsa-miR-92a-3p;NC_000007.14_16719;NC_000009.12_21957;NC_000016.10_31157;NC_000018.10_33037;…
FBXO32	NR_033268	0.422018	3.35321e-53	39	hsa-miR-372-5p;hsa-miR-3155a;hsa-miR-30c-1-3p;hsa-miR-371b-3p;NC_000010.11_23303;hsa-miR-7974;hsa-miR-629-3p;NC_000007.14_17821;hsa-miR-510-5p;hsa-miR-302a-5p;NC_000003.12_8583;NC_000012.12_25887;hsa-miR-18a-3p;hsa-miR-302c-5p;NC_000012.12_26286;NC_000006.12_15769;hsa-miR-17-5p;NC_000022.11_36372;hsa-miR-26a-1-3p;hsa-miR-7-5p;NC_000001.11_3101;NC_000003.12_9133;hsa-miR-512-3p;NC_000003.12_7520;NC…
NR5A2	ENST00000281092	0.28	3.52047e-53	37	hsa-miR-372-5p;NC_000008.11_19445;NC_000010.11_23303;hsa-miR-629-3p;hsa-miR-27b-5p;NC_000012.12_25887;NC_000011.10_25384;NC_000005.10_11919>NC_000005.10_11920;NC_000004.12_9892;hsa-miR-302c-5p;NC_000006.12_15769;hsa-miR-34c-5p;NC_000005.10_14158;hsa-miR-1257;NC_000002.12_3238;NC_000003.12_7973;NC_000012.12_25503;hsa-miR-345-5p;hsa-miR-3529-3p;NC_000020.11_35116;NC_000012.12_26414;NC_000018.10_330…
KDM7A	NR_038921	0.62	3.55573e-53	38	hsa-miR-25-5p;NC_000008.11_19445;NC_000005.10_12588;hsa-miR-3662;NC_000007.14_17821;NC_000021.9_35751;NC_000012.12_25887;NC_000011.10_25384;NC_000005.10_11919>NC_000005.10_11920;NC_000004.12_9892;NC_000009.12_21255;hsa-miR-302c-5p;NC_000006.12_15769;hsa-miR-17-5p;NC_000022.11_36372;hsa-miR-26a-1-3p;NC_000002.12_3238;NC_000003.12_7973;hsa-miR-512-3p;NC_000015.10_30316;hsa-miR-515-5p;NC_000016.10_3…
DENND4A	ENST00000237264	0.588235	3.55573e-53	38	NC_000001.11_2008;NC_000006.12_14671;NC_000013.11_28441;NC_000008.11_19445;NC_000005.10_12588;hsa-miR-518e-5p>hsa-miR-519a-5p>hsa-miR-519b-5p>hsa-miR-519c-5p>hsa-miR-522-5p>hsa-miR-523-5p;hsa-miR-3662;hsa-miR-1298-5p;hsa-miR-27b-5p;NC_000021.9_35751;NC_000012.12_25887;NC_000011.10_25384;NC_000005.10_11919>NC_000005.10_11920;NC_000004.12_9892;NC_000006.12_15769;hsa-miR-34c-5p;NC_000013.11_27627;hs…
DMXL2	NONHSAT215932	0.504202	3.72044e-53	35	hsa-miR-33b-3p;hsa-miR-372-5p;hsa-miR-30c-1-3p;hsa-miR-498;NC_000023.11_36905;NC_000010.11_23303;hsa-miR-7974;NC_000012.12_25887;NC_000011.10_25384;NC_000005.10_11919>NC_000005.10_11920;hsa-miR-302c-5p;NC_000012.12_26286;NC_000006.12_15769;hsa-miR-17-5p;hsa-miR-34c-5p;NC_000013.11_27627;hsa-miR-1257;hsa-miR-26a-1-3p;NC_000008.11_20037*;NC_000011.10_25091;NC_000015.10_30316;NC_000003.12_7520;NC_00…
CPEB2	NR_033268	0.412844	4.05004e-53	41	hsa-miR-934;hsa-miR-3155a;NC_000013.11_28441;hsa-miR-30c-1-3p;NC_000023.11_36905;hsa-miR-371b-3p;hsa-miR-92a-1-5p;hsa-miR-7974;hsa-miR-518e-5p>hsa-miR-519a-5p>hsa-miR-519b-5p>hsa-miR-519c-5p>hsa-miR-522-5p>hsa-miR-523-5p;hsa-miR-629-3p;NC_000007.14_17821;hsa-miR-302a-5p;NC_000010.11_23646;NC_000003.12_8583;hsa-miR-18a-3p;hsa-miR-302c-5p;hsa-miR-17-5p;NC_000022.11_36372;NC_000005.10_14158;hsa-miR-…
RNF6	ENST00000261530	0.280612	4.53334e-53	36	hsa-miR-934;hsa-miR-33b-3p;NC_000006.12_14671;hsa-miR-25-5p;NC_000013.11_28441;NC_000010.11_23303;hsa-miR-92a-1-5p;hsa-miR-27b-5p;hsa-miR-18a-3p;NC_000011.10_25384;NC_000018.10_33742;NC_000005.10_11919>NC_000005.10_11920;hsa-miR-302c-5p;hsa-miR-17-5p;NC_000013.11_27627;hsa-miR-26a-1-3p;NC_000002.12_3238;NC_000012.12_25503;hsa-miR-519a-3p;hsa-miR-345-5p;hsa-miR-515-5p;NC_000020.11_35116;hsa-miR-51…
ARHGAP5	ENST00000432045	0.625	5.4201e-53	33	hsa-miR-372-5p;hsa-miR-30c-1-3p;NC_000008.11_19445;hsa-miR-498;NC_000012.12_25887;hsa-miR-18a-3p;NC_000011.10_25384;NC_000004.12_9892;NC_000009.12_21255;NC_000006.12_15769;hsa-miR-17-5p;NC_000022.11_36372;hsa-miR-26a-1-3p;hsa-miR-1257;NC_000008.11_20037*;NC_000011.10_25091;hsa-miR-515-5p;NC_000003.12_7520;NC_000020.11_35116;hsa-miR-548d-3p;hsa-miR-296-3p;hsa-miR-302b-3p;hsa-miR-20a-5p;hsa-miR-314…
ADAM20	ENST00000237264	0.694118	5.88581e-53	40	hsa-miR-33b-3p;NC_000006.12_14671;NC_000013.11_28441;NC_000005.10_12140;hsa-miR-92a-1-5p;hsa-miR-7974;hsa-miR-518e-5p>hsa-miR-519a-5p>hsa-miR-519b-5p>hsa-miR-519c-5p>hsa-miR-522-5p>hsa-miR-523-5p;hsa-miR-3662;hsa-miR-510-5p;NC_000021.9_35751;NC_000012.12_25887;hsa-miR-18a-3p;NC_000011.10_25384;NC_000005.10_11919>NC_000005.10_11920;hsa-miR-302c-5p;NC_000006.12_15769;hsa-miR-34c-5p;NC_000006.12_158…
NIPAL2	ENST00000281092	0.335	6.32468e-53	35	NC_000001.11_2008;hsa-miR-934;hsa-miR-33b-3p;hsa-miR-372-5p;hsa-miR-30c-1-3p;NC_000008.11_19445;hsa-miR-629-3p;NC_000012.12_25887;NC_000011.10_25384;NC_000004.12_9892;NC_000006.12_15769;NC_000013.11_27627;NC_000022.11_36372;hsa-miR-26a-1-3p;hsa-miR-7-5p;NC_000001.11_3101;NC_000003.12_7973;NC_000011.10_25091;hsa-miR-345-5p;hsa-miR-515-5p;NC_000020.11_35116;hsa-miR-517a-3p>hsa-miR-517b-3p;NC_000018…
CHD2	ENST00000281092	0.29	6.32468e-53	35	hsa-miR-934;hsa-miR-33b-3p;hsa-miR-372-5p;hsa-miR-498;hsa-miR-371b-3p;NC_000010.11_23303;hsa-miR-92a-1-5p;hsa-miR-1298-5p;NC_000012.12_25887;NC_000011.10_25384;hsa-miR-302c-5p;NC_000006.12_15769;hsa-miR-17-5p;NC_000013.11_27627;NC_000022.11_36372;hsa-miR-1257;hsa-miR-7-5p;NC_000001.11_3101;NC_000008.11_20037*;NC_000002.12_3238;NC_000011.10_25091;hsa-miR-15b-3p;hsa-miR-345-5p;hsa-miR-3529-3p;NC_00…
GRB10	ENST00000281092	0.29	6.35662e-53	42	hsa-miR-33b-3p;NC_000006.12_14671;hsa-miR-372-5p;hsa-miR-30c-1-3p;NC_000010.11_23303;hsa-miR-92a-1-5p;hsa-miR-27b-5p;NC_000012.12_25887;hsa-miR-18a-3p;NC_000011.10_25384;NC_000005.10_11919>NC_000005.10_11920;hsa-miR-302c-5p;NC_000012.12_26286;NC_000006.12_15769;hsa-miR-34c-5p;NC_000006.12_15809;NC_000022.11_36372;NC_000005.10_14158;hsa-miR-1257;hsa-miR-26a-1-3p;hsa-miR-7-5p;NC_000001.11_3101;NC_0…
TLDC1	ENST00000261530	0.290816	8.96333e-53	40	NC_000001.11_2008;hsa-miR-934;hsa-miR-33b-3p;NC_000006.12_14671;hsa-miR-30c-1-3p;NC_000008.11_19445;hsa-miR-498;NC_000010.11_23303;hsa-miR-92a-1-5p;hsa-miR-629-3p;NC_000010.11_23646;NC_000012.12_25887;hsa-miR-18a-3p;NC_000011.10_25384;NC_000018.10_33742;NC_000005.10_11919>NC_000005.10_11920;hsa-miR-17-5p;NC_000022.11_36437;hsa-miR-7-5p;NC_000001.11_3101;NC_000002.12_3238;hsa-miR-519a-3p;NC_000015…
C1orf116	NR_033268	0.431193	9.20075e-53	39	hsa-miR-934;hsa-miR-372-5p;hsa-miR-3155a;NC_000013.11_28441;hsa-miR-30c-1-3p;NC_000010.11_23303;hsa-miR-92a-1-5p;hsa-miR-7974;hsa-miR-518e-5p>hsa-miR-519a-5p>hsa-miR-519b-5p>hsa-miR-519c-5p>hsa-miR-522-5p>hsa-miR-523-5p;NC_000007.14_17821;hsa-miR-510-5p;NC_000021.9_35751;NC_000003.12_8583;NC_000005.10_14158;hsa-miR-26a-1-3p;NC_000001.11_3101;NC_000002.12_3238;hsa-miR-520a-3p;NC_000011.10_25091;hs…
MAP2	NR_034072	0.730159	1.22091e-52	36	hsa-miR-372-5p;NC_000013.11_28441;hsa-miR-30c-1-3p;hsa-miR-371b-3p;hsa-miR-7974;hsa-miR-3662;hsa-miR-510-5p;hsa-miR-302a-5p;NC_000012.12_25887;NC_000004.12_10500;NC_000011.10_25384;hsa-miR-302c-5p;NC_000006.12_15769;hsa-miR-17-5p;NC_000006.12_15809;NC_000013.11_27627;hsa-miR-26a-1-3p;hsa-miR-7-5p;NC_000002.12_3238;NC_000012.12_25503;hsa-miR-512-3p;hsa-miR-345-5p;hsa-miR-515-5p;NC_000003.12_7520;N…
ZEB1	NONHSAT215932	0.529412	1.23002e-52	36	hsa-miR-372-5p;NC_000013.11_28441;hsa-miR-30c-1-3p;NC_000023.11_36905;hsa-miR-92a-1-5p;hsa-miR-518e-5p>hsa-miR-519a-5p>hsa-miR-519b-5p>hsa-miR-519c-5p>hsa-miR-522-5p>hsa-miR-523-5p;NC_000021.9_35751;NC_000012.12_25887;NC_000011.10_25384;hsa-miR-302c-5p;NC_000012.12_26286;NC_000006.12_15769;hsa-miR-34c-5p;NC_000013.11_27627;hsa-miR-26a-1-3p;NC_000002.12_3238;NC_000008.11_20037*;NC_000011.10_25091;…
VCPIP1	NR_038921	0.57	1.23002e-52	36	hsa-miR-372-5p;hsa-miR-30c-1-3p;NC_000008.11_19445;NC_000005.10_12588;hsa-miR-7974;NC_000012.12_25887;NC_000011.10_25384;NC_000005.10_11919>NC_000005.10_11920;NC_000004.12_9892;NC_000009.12_21255;hsa-miR-302c-5p;NC_000006.12_15769;hsa-miR-17-5p;NC_000013.11_27627;NC_000022.11_36372;hsa-miR-26a-1-3p;hsa-miR-1257;NC_000002.12_3238;NC_000003.12_7973;NC_000015.10_30316;hsa-miR-515-5p;NC_000016.10_311…
VCPIP1	NONHSAT215932	0.487395	1.23002e-52	36	hsa-miR-934;hsa-miR-33b-3p;hsa-miR-372-5p;hsa-miR-30c-1-3p;hsa-miR-498;hsa-miR-7974;NC_000012.12_25887;NC_000011.10_25384;NC_000005.10_11919>NC_000005.10_11920;hsa-miR-302c-5p;NC_000006.12_15769;hsa-miR-17-5p;hsa-miR-34c-5p;NC_000013.11_27627;hsa-miR-26a-1-3p;hsa-miR-1257;NC_000002.12_3238;NC_000008.11_20037*;NC_000003.12_7973;NC_000011.10_25091;NC_000015.10_30316;hsa-miR-15b-3p;NC_000003.12_7520…
NAB1	NR_038921	0.44	1.23018e-52	35	NC_000001.11_2008;NC_000013.11_28441;hsa-miR-30c-1-3p;NC_000008.11_19445;hsa-miR-7974;hsa-miR-518e-5p>hsa-miR-519a-5p>hsa-miR-519b-5p>hsa-miR-519c-5p>hsa-miR-522-5p>hsa-miR-523-5p;hsa-miR-3662;NC_000007.14_17821;hsa-miR-1298-5p;NC_000021.9_35751;NC_000012.12_25887;NC_000004.12_9892;hsa-miR-302c-5p;NC_000006.12_15769;hsa-miR-17-5p;NC_000013.11_27627;hsa-miR-1257;NC_000002.12_3238;NC_000003.12_7973…
AHNAK2	ENST00000263967	0.383562	1.44471e-52	38	hsa-miR-934;hsa-miR-33b-3p;hsa-miR-372-5p;hsa-miR-30c-1-3p;hsa-miR-371b-3p;hsa-miR-92a-1-5p;hsa-miR-7974;hsa-miR-3662;NC_000007.14_17821;NC_000010.11_23646;NC_000012.12_25887;NC_000004.12_10500;NC_000011.10_25384;hsa-miR-302c-5p;NC_000006.12_15769;NC_000013.11_27627;NC_000022.11_36437;hsa-miR-1257;hsa-miR-7-5p;NC_000002.12_3238;NC_000011.10_25091;hsa-miR-15b-3p;hsa-miR-345-5p;NC_000003.12_7520;NC…
TNFSF15	ENST00000263967	0.410959	1.49525e-52	39	hsa-miR-934;hsa-miR-372-5p;NC_000013.11_28441;hsa-miR-30c-1-3p;hsa-miR-92a-1-5p;hsa-miR-7974;hsa-miR-629-3p;hsa-miR-3662;NC_000010.11_23646;NC_000004.12_10500;NC_000011.10_25384;NC_000004.12_9892;hsa-miR-302c-5p;NC_000006.12_15769;hsa-miR-17-5p;NC_000022.11_36437;hsa-miR-26a-1-3p;hsa-miR-1257;hsa-miR-7-5p;NC_000002.12_3238;hsa-miR-15b-3p;hsa-miR-302b-5p;hsa-miR-345-5p;NC_000003.12_7520;NC_000016.…
GNE	ENST00000281092	0.28	1.52032e-52	40	hsa-miR-934;hsa-miR-30c-1-3p;NC_000010.11_23303;hsa-miR-675-5p;hsa-miR-92a-1-5p;hsa-miR-629-3p;hsa-miR-1298-5p;NC_000012.12_25887;NC_000005.10_11919>NC_000005.10_11920;hsa-miR-302c-5p;NC_000006.12_15769;hsa-miR-17-5p;hsa-miR-34c-5p;NC_000006.12_15809;NC_000013.11_27627;NC_000022.11_36372;NC_000005.10_14158;hsa-miR-1257;NC_000001.11_3101;NC_000008.11_20037*;NC_000002.12_3238;NC_000003.12_7973;NC_0…
SLC7A11	ENST00000261530	0.403061	1.69083e-52	42	hsa-miR-934;hsa-miR-372-5p;NC_000013.11_28441;hsa-miR-30c-1-3p;NC_000008.11_19445;NC_000023.11_36905;NC_000003.12_7276;NC_000007.14_17821;hsa-miR-27b-5p;NC_000010.11_23646;NC_000021.9_35751;NC_000012.12_25887;NC_000011.10_25384;NC_000018.10_33742;hsa-miR-302c-5p;hsa-miR-17-5p;NC_000006.12_15809;hsa-miR-26a-1-3p;hsa-miR-1257;hsa-miR-7-5p;NC_000001.11_3101;NC_000002.12_3238;NC_000003.12_7973;NC_000…
ERRFI1	ENST00000261530	0.270408	1.81915e-52	39	NC_000006.12_14671;hsa-miR-372-5p;hsa-miR-30c-1-3p;NC_000008.11_19445;hsa-miR-498;hsa-miR-629-3p;NC_000007.14_17821;hsa-miR-1298-5p;NC_000021.9_35751;NC_000012.12_25887;hsa-miR-18a-3p;NC_000011.10_25384;hsa-miR-17-5p;NC_000006.12_15809;NC_000013.11_27627;NC_000005.10_14158;hsa-miR-26a-1-3p;hsa-miR-7-5p;NC_000001.11_3101;NC_000002.12_3238;NC_000003.12_7973;NC_000012.12_25503;hsa-miR-519a-3p;hsa-mi…
BAHCC1	ENST00000261530	0.326531	1.81915e-52	39	NC_000006.12_14671;hsa-miR-25-5p;hsa-miR-372-5p;hsa-miR-30c-1-3p;NC_000023.11_36905;hsa-miR-371b-3p;hsa-miR-92a-1-5p;hsa-miR-629-3p;NC_000007.14_17821;hsa-miR-27b-5p;NC_000010.11_23646;NC_000021.9_35751;NC_000012.12_25887;hsa-miR-18a-3p;NC_000011.10_25384;NC_000004.12_9892;NC_000005.10_11919>NC_000005.10_11920;hsa-miR-17-5p;hsa-miR-34c-5p;NC_000013.11_27627;NC_000005.10_14158;hsa-miR-7-5p;NC_0000…
RALGPS2	ENST00000563635	0.648649	1.92328e-52	38	hsa-miR-934;hsa-miR-33b-3p;NC_000006.12_14671;hsa-miR-372-5p;NC_000013.11_28441;hsa-miR-3155a;NC_000008.11_19445;hsa-miR-518e-5p>hsa-miR-519a-5p>hsa-miR-519b-5p>hsa-miR-519c-5p>hsa-miR-522-5p>hsa-miR-523-5p;hsa-miR-3662;NC_000007.14_17821;hsa-miR-302a-5p;NC_000012.12_25887;hsa-miR-18a-3p;NC_000011.10_25384;NC_000004.12_9892;hsa-miR-302c-5p;NC_000006.12_15769;NC_000022.11_36372;NC_000022.11_36437;…
VCPIP1	ENST00000395116	0.76	1.9523e-52	31	hsa-miR-33b-3p;hsa-miR-498;hsa-miR-675-5p;hsa-miR-629-3p;NC_000012.12_25887;hsa-miR-18a-3p;NC_000011.10_25384;NC_000004.12_9892;hsa-miR-17-5p;NC_000013.11_27627;hsa-miR-1257;hsa-miR-26a-1-3p;hsa-miR-7-5p;NC_000008.11_20037*;NC_000003.12_7973;NC_000011.10_25091;hsa-miR-515-5p;NC_000018.10_33037;hsa-miR-548d-3p;hsa-miR-302b-3p;hsa-miR-20a-5p;NC_000009.12_21925;hsa-miR-3143;hsa-miR-582-5p;hsa-miR-52…
ASPH	NR_038921	0.49	1.98268e-52	37	hsa-miR-372-5p;hsa-miR-30c-1-3p;NC_000008.11_19445;hsa-miR-7974;hsa-miR-518e-5p>hsa-miR-519a-5p>hsa-miR-519b-5p>hsa-miR-519c-5p>hsa-miR-522-5p>hsa-miR-523-5p;hsa-miR-3662;NC_000012.12_25887;NC_000009.12_21255;NC_000006.12_15769;hsa-miR-17-5p;NC_000006.12_15809;NC_000013.11_27627;NC_000022.11_36372;hsa-miR-1257;hsa-miR-26a-1-3p;NC_000001.11_3101;NC_000002.12_3238;NC_000015.10_30316;hsa-miR-512-3p;…
C1orf116	NONHSAT215932	0.394958	1.98268e-52	37	hsa-miR-934;hsa-miR-372-5p;NC_000013.11_28441;hsa-miR-30c-1-3p;hsa-miR-498;NC_000010.11_23303;hsa-miR-92a-1-5p;hsa-miR-7974;hsa-miR-518e-5p>hsa-miR-519a-5p>hsa-miR-519b-5p>hsa-miR-519c-5p>hsa-miR-522-5p>hsa-miR-523-5p;NC_000007.14_17821;NC_000021.9_35751;NC_000011.10_25384;NC_000005.10_11919>NC_000005.10_11920;hsa-miR-34c-5p;NC_000005.10_14158;hsa-miR-26a-1-3p;NC_000002.12_3238;NC_000011.10_25091…
ITPR1	NR_033268	0.541284	2.10447e-52	41	NC_000009.12_21574;hsa-miR-371a-5p;hsa-miR-372-5p;hsa-miR-3155a;NC_000013.11_28441;hsa-miR-30c-1-3p;NC_000023.11_36905;NC_000010.11_23303;hsa-miR-7974;NC_000003.12_7276;NC_000007.14_17821;hsa-miR-510-5p;hsa-miR-302a-5p;NC_000003.12_8583;NC_000010.11_23646;hsa-miR-18a-3p;NC_000012.12_25887;NC_000004.12_9958;NC_000012.12_26286;NC_000006.12_15769;NC_000005.10_14158;hsa-miR-26a-1-3p;hsa-miR-7-5p;NC_0…
VDR	NR_033268	0.40367	2.16107e-52	36	hsa-miR-934;hsa-miR-372-5p;hsa-miR-3155a;NC_000009.12_20733;hsa-miR-371b-3p;hsa-miR-92a-1-5p;hsa-miR-7974;hsa-miR-629-3p;hsa-miR-302a-5p;NC_000021.9_35751;NC_000012.12_25887;hsa-miR-18a-3p;hsa-miR-302c-5p;NC_000006.12_15769;NC_000022.11_36372;NC_000005.10_14158;hsa-miR-26a-1-3p;NC_000001.11_3101;NC_000002.12_3238;NC_000003.12_9133;NC_000011.10_25091;hsa-miR-512-3p;hsa-miR-302b-5p;NC_000020.11_351…
TTN	ENST00000432045	0.8375	2.21467e-52	36	NC_000006.12_14671;hsa-miR-25-5p;hsa-miR-372-5p;hsa-miR-30c-1-3p;NC_000003.12_7276;hsa-miR-629-3p;NC_000012.12_25887;hsa-miR-18a-3p;NC_000011.10_25384;NC_000004.12_9892;NC_000009.12_21255;NC_000006.12_15769;hsa-miR-17-5p;hsa-miR-34c-5p;NC_000022.11_36372;hsa-miR-26a-1-3p;hsa-miR-1257;hsa-miR-7-5p;NC_000008.11_20037*;NC_000011.10_25091;NC_000003.12_7520;NC_000020.11_35116;NC_000012.12_26721;hsa-mi…
NAMPT	ENST00000263967	0.335616	2.58893e-52	36	hsa-miR-33b-3p;hsa-miR-372-5p;NC_000013.11_28441;hsa-miR-30c-1-3p;hsa-miR-92a-1-5p;hsa-miR-7974;hsa-miR-3662;NC_000007.14_17821;NC_000012.12_25887;NC_000004.12_10500;NC_000011.10_25384;NC_000005.10_11919>NC_000005.10_11920;hsa-miR-302c-5p;hsa-miR-17-5p;NC_000013.11_27627;NC_000022.11_36437;hsa-miR-26a-1-3p;hsa-miR-1257;hsa-miR-7-5p;NC_000011.10_25091;NC_000015.10_30316;hsa-miR-15b-3p;hsa-miR-302b…
PPARA	NONHSAT215932	0.621849	2.60667e-52	39	hsa-miR-33b-3p;NC_000013.11_28441;hsa-miR-30c-1-3p;NC_000023.11_36905;NC_000010.11_23303;hsa-miR-92a-1-5p;hsa-miR-7974;hsa-miR-518e-5p>hsa-miR-519a-5p>hsa-miR-519b-5p>hsa-miR-519c-5p>hsa-miR-522-5p>hsa-miR-523-5p;NC_000010.11_23646;NC_000021.9_35751;NC_000012.12_25887;NC_000011.10_25384;NC_000005.10_11919>NC_000005.10_11920;hsa-miR-302c-5p;NC_000012.12_26286;NC_000006.12_15769;hsa-miR-17-5p;hsa-m…
ANK2	NONHSAT217150	0.884615	2.76765e-52	37	hsa-miR-33b-3p;hsa-miR-372-5p;hsa-miR-3155a;NC_000013.11_28441;hsa-miR-30c-1-3p;NC_000010.11_23303;hsa-miR-371b-3p;hsa-miR-629-3p;hsa-miR-3662;hsa-miR-27b-5p;NC_000021.9_35751;NC_000004.12_10500;NC_000011.10_25384;NC_000005.10_11919>NC_000005.10_11920;hsa-miR-17-5p;NC_000006.12_15809;NC_000022.11_36372;NC_000005.10_14158;hsa-miR-1257;NC_000001.11_3101;NC_000008.11_20037*;NC_000003.12_9133;NC_0000…
ANK2	ENST00000568777	0.715909	2.77005e-52	40	hsa-miR-33b-3p;hsa-miR-372-5p;NC_000013.11_28441;hsa-miR-30c-1-3p;hsa-miR-371b-3p;hsa-miR-675-5p;hsa-miR-92a-1-5p;hsa-miR-518e-5p>hsa-miR-519a-5p>hsa-miR-519b-5p>hsa-miR-519c-5p>hsa-miR-522-5p>hsa-miR-523-5p;NC_000003.12_7276;hsa-miR-629-3p;NC_000010.11_23646;NC_000003.12_8583;NC_000012.12_25887;NC_000018.10_33742;hsa-miR-302c-5p;NC_000006.12_15769;hsa-miR-34c-5p;hsa-miR-26a-1-3p;hsa-miR-7-5p;NC_…
TBC1D19	ENST00000281092	0.315	3.09057e-52	38	hsa-miR-934;hsa-miR-372-5p;hsa-miR-30c-1-3p;hsa-miR-92a-1-5p;hsa-miR-629-3p;hsa-miR-1298-5p;NC_000021.9_35751;NC_000012.12_25887;hsa-miR-18a-3p;NC_000011.10_25384;NC_000005.10_11919>NC_000005.10_11920;NC_000012.12_26286;NC_000006.12_15769;hsa-miR-34c-5p;NC_000006.12_15809;NC_000022.11_36372;NC_000005.10_14158;hsa-miR-1257;hsa-miR-7-5p;NC_000003.12_7973;NC_000012.12_25503;NC_000011.10_25091;hsa-mi…
LYST	NONHSAT123764	0.735294	3.16625e-52	36	hsa-miR-934;NC_000006.12_14671;hsa-miR-372-5p;NC_000013.11_28441;hsa-miR-30c-1-3p;NC_000005.10_12140;hsa-miR-7974;NC_000003.12_8583;NC_000021.9_35751;NC_000011.10_25384;NC_000009.12_21255;hsa-miR-302c-5p;hsa-miR-17-5p;NC_000020.11_34925;NC_000013.11_27627;NC_000022.11_36372;NC_000022.11_36437;NC_000002.12_3238;NC_000003.12_7973;NC_000018.10_33480;hsa-miR-519a-3p;NC_000015.10_30316;hsa-miR-15b-3p;…
KANSL1L	ENST00000281092	0.375	3.35539e-52	35	hsa-miR-372-5p;hsa-miR-30c-1-3p;hsa-miR-629-3p;NC_000012.12_25887;hsa-miR-18a-3p;NC_000011.10_25384;NC_000005.10_11919>NC_000005.10_11920;NC_000012.12_26286;NC_000006.12_15769;hsa-miR-17-5p;NC_000013.11_27627;NC_000022.11_36372;hsa-miR-7-5p;NC_000003.12_7973;NC_000012.12_25503;NC_000011.10_25091;hsa-miR-15b-3p;hsa-miR-345-5p;hsa-miR-3529-3p;NC_000003.12_7520;hsa-miR-517a-3p>hsa-miR-517b-3p;NC_000…
GRB10	NONHSAT224112	0.626667	3.45314e-52	38	hsa-miR-371a-5p;hsa-miR-372-5p;hsa-miR-3155a;NC_000010.11_23303;hsa-miR-92a-1-5p;hsa-miR-3662;NC_000003.12_8583;NC_000012.12_25887;hsa-miR-18a-3p;NC_000004.12_10500;NC_000006.12_15769;NC_000022.11_36372;hsa-miR-26a-1-3p;NC_000022.11_36437;hsa-miR-7-5p;hsa-miR-520a-3p;NC_000023.11_38289;hsa-miR-512-3p;hsa-miR-345-5p;hsa-miR-5585-3p;hsa-miR-92a-3p;NC_000020.11_35116;NC_000007.14_16719;NC_000009.12_…
ZNF704	ENST00000563635	0.662162	3.73294e-52	38	hsa-miR-934;hsa-miR-33b-3p;NC_000006.12_14671;NC_000013.11_28441;NC_000003.12_7276;hsa-miR-3662;NC_000007.14_17821;hsa-miR-302a-5p;NC_000021.9_35751;NC_000003.12_8583;hsa-miR-18a-3p;NC_000012.12_25887;NC_000011.10_25384;NC_000004.12_9892;hsa-miR-302c-5p;NC_000006.12_15769;hsa-miR-17-5p;NC_000022.11_36372;NC_000022.11_36437;hsa-miR-26a-1-3p;NC_000001.11_3101;NC_000008.11_20037*;NC_000012.12_25503;…
DENND4A	lnc-POTED-16:1	0.761905	4.27947e-52	33	hsa-miR-1323;NC_000013.11_28441;NC_000008.11_19445;NC_000010.11_23303;hsa-miR-3662;NC_000007.14_17821;hsa-miR-27b-5p;NC_000012.12_25887;NC_000011.10_25384;NC_000004.12_9892;NC_000012.12_26286;NC_000006.12_15769;hsa-miR-17-5p;hsa-miR-1257;hsa-miR-7-5p;NC_000012.12_25503;NC_000011.10_25091;hsa-miR-519a-3p;hsa-miR-15b-3p;hsa-miR-3529-3p;hsa-miR-515-5p;NC_000020.11_35116;NC_000003.12_7520;NC_000018.1…
XIAP	NR_038921	0.64	4.29824e-52	38	hsa-miR-25-5p;hsa-miR-372-5p;NC_000013.11_28441;hsa-miR-30c-1-3p;NC_000008.11_19445;hsa-miR-7974;hsa-miR-3662;NC_000007.14_17821;NC_000021.9_35751;NC_000012.12_25887;NC_000011.10_25384;NC_000004.12_9892;NC_000009.12_21255;hsa-miR-302c-5p;NC_000006.12_15769;hsa-miR-17-5p;NC_000013.11_27627;NC_000022.11_36372;hsa-miR-1257;hsa-miR-26a-1-3p;NC_000001.11_3101;NC_000002.12_3238;NC_000003.12_7973;hsa-mi…
XIAP	NONHSAT215932	0.529412	4.29824e-52	38	hsa-miR-934;hsa-miR-372-5p;NC_000013.11_28441;hsa-miR-30c-1-3p;hsa-miR-498;NC_000010.11_23303;hsa-miR-7974;NC_000007.14_17821;NC_000010.11_23646;NC_000021.9_35751;NC_000012.12_25887;NC_000011.10_25384;hsa-miR-302c-5p;NC_000006.12_15769;hsa-miR-17-5p;hsa-miR-34c-5p;NC_000013.11_27627;hsa-miR-1257;hsa-miR-26a-1-3p;NC_000008.11_20037*;NC_000003.12_9133;NC_000003.12_7973;NC_000002.12_3238;NC_000011.1…
DENND2C	ENST00000281092	0.315	4.81222e-52	37	hsa-miR-934;hsa-miR-372-5p;hsa-miR-30c-1-3p;NC_000010.11_23303;hsa-miR-92a-1-5p;NC_000021.9_35751;NC_000012.12_25887;NC_000012.12_26286;NC_000006.12_15769;hsa-miR-17-5p;NC_000013.11_27627;NC_000022.11_36372;hsa-miR-1257;hsa-miR-7-5p;NC_000002.12_3238;NC_000011.10_25091;hsa-miR-345-5p;hsa-miR-3529-3p;NC_000020.11_35116;NC_000003.12_7520;NC_000016.10_31157;NC_000012.12_26414;NC_000018.10_33037;NC_0…
NCOA3	NONHSAT215932	0.445378	4.88107e-52	37	hsa-miR-33b-3p;hsa-miR-372-5p;NC_000013.11_28441;hsa-miR-30c-1-3p;hsa-miR-498;NC_000023.11_36905;NC_000010.11_23303;hsa-miR-92a-1-5p;hsa-miR-7974;NC_000007.14_17821;NC_000010.11_23646;NC_000012.12_25887;NC_000011.10_25384;hsa-miR-302c-5p;NC_000012.12_26286;NC_000006.12_15769;hsa-miR-17-5p;hsa-miR-26a-1-3p;NC_000002.12_3238;NC_000003.12_7973;hsa-miR-519a-3p;NC_000015.10_30316;hsa-miR-15b-3p;NC_000…
GFPT1	NONHSAT215932	0.512605	5.39478e-52	39	hsa-miR-934;hsa-miR-33b-3p;hsa-miR-372-5p;hsa-miR-30c-1-3p;hsa-miR-498;hsa-miR-92a-1-5p;NC_000007.14_17821;NC_000010.11_23646;NC_000012.12_25887;NC_000005.10_11919>NC_000005.10_11920;hsa-miR-302c-5p;NC_000012.12_26286;NC_000006.12_15769;hsa-miR-17-5p;hsa-miR-34c-5p;NC_000013.11_27627;NC_000008.11_20037*;NC_000003.12_9133;NC_000003.12_7973;NC_000011.10_25091;hsa-miR-519a-3p;NC_000015.10_30316;hsa-…
SOS2	ENST00000281092	0.27	6.63794e-52	34	hsa-miR-33b-3p;NC_000006.12_14671;hsa-miR-1323;hsa-miR-372-5p;hsa-miR-30c-1-3p;NC_000008.11_19445;hsa-miR-498;NC_000021.9_35751;NC_000012.12_25887;NC_000011.10_25384;NC_000004.12_9892;NC_000005.10_11919>NC_000005.10_11920;NC_000006.12_15769;hsa-miR-17-5p;NC_000022.11_36372;hsa-miR-26a-1-3p;hsa-miR-7-5p;NC_000001.11_3101;NC_000011.10_25091;hsa-miR-15b-3p;hsa-miR-515-5p;NC_000012.12_26414;NC_000012…
CPEB2	ENST00000263967	0.40411	7.37583e-52	39	hsa-miR-934;hsa-miR-33b-3p;NC_000013.11_28441;hsa-miR-30c-1-3p;hsa-miR-498;hsa-miR-371b-3p;hsa-miR-92a-1-5p;hsa-miR-7974;hsa-miR-629-3p;hsa-miR-3662;NC_000007.14_17821;NC_000010.11_23646;NC_000011.10_25384;NC_000004.12_9892;NC_000009.12_21255;hsa-miR-302c-5p;hsa-miR-17-5p;NC_000022.11_36437;hsa-miR-26a-1-3p;hsa-miR-7-5p;NC_000002.12_3238;NC_000011.10_25091;hsa-miR-519a-3p;NC_000003.12_7520;NC_000…
MAP2	NONHSAT219565	0.792453	7.37662e-52	36	NC_000013.11_28441;hsa-miR-498;NC_000008.11_19445;NC_000023.11_36905;hsa-miR-3662;hsa-miR-510-5p;hsa-miR-27b-5p;NC_000003.12_8583;hsa-miR-302a-5p;NC_000011.10_25384;NC_000009.12_21255;hsa-miR-17-5p;hsa-miR-34c-5p;NC_000002.12_3238;NC_000003.12_9133;NC_000003.12_7973;NC_000018.10_33480;NC_000012.12_25503;hsa-miR-519a-3p;NC_000015.10_30316;hsa-miR-15b-3p;hsa-miR-302b-5p;NC_000003.12_7520;NC_000016.…
AUTS2	ENST00000263967	0.513699	8.12584e-52	41	hsa-miR-934;hsa-miR-33b-3p;hsa-miR-372-5p;hsa-miR-30c-1-3p;hsa-miR-92a-1-5p;hsa-miR-7974;hsa-miR-3662;NC_000007.14_17821;NC_000010.11_23646;NC_000012.12_25887;NC_000004.12_10500;NC_000011.10_25384;NC_000005.10_11919>NC_000005.10_11920;NC_000009.12_21255;hsa-miR-302c-5p;NC_000006.12_15769;NC_000013.11_27627;NC_000022.11_36437;hsa-miR-26a-1-3p;hsa-miR-1257;hsa-miR-7-5p;NC_000002.12_3238;NC_000011.1…
GALNT5	NR_038921	0.64	8.5481e-52	40	hsa-miR-25-5p;hsa-miR-372-5p;NC_000013.11_28441;hsa-miR-30c-1-3p;NC_000008.11_19445;hsa-miR-371b-3p;hsa-miR-518e-5p>hsa-miR-519a-5p>hsa-miR-519b-5p>hsa-miR-519c-5p>hsa-miR-522-5p>hsa-miR-523-5p;hsa-miR-3662;NC_000007.14_17821;hsa-miR-1298-5p;NC_000012.12_25887;NC_000011.10_25384;hsa-miR-302c-5p;NC_000006.12_15769;hsa-miR-17-5p;NC_000013.11_27627;NC_000022.11_36372;hsa-miR-1257;hsa-miR-26a-1-3p;NC…
HIPK2	NR_003268	0.938776	8.66912e-52	35	hsa-miR-934;hsa-miR-372-5p;hsa-miR-3155a;NC_000013.11_28441;NC_000005.10_12140;NC_000008.11_19445;hsa-miR-518b;hsa-miR-518e-5p>hsa-miR-519a-5p>hsa-miR-519b-5p>hsa-miR-519c-5p>hsa-miR-522-5p>hsa-miR-523-5p;hsa-miR-3662;NC_000004.12_10500;NC_000011.10_25384;NC_000009.12_21255;hsa-miR-17-5p;hsa-miR-34c-5p;NC_000022.11_36372;NC_000022.11_36437;NC_000002.12_3238;NC_000003.12_9133;NC_000011.10_25091;hs…
PIK3CA	ENST00000261530	0.336735	8.99438e-52	42	hsa-miR-934;hsa-miR-33b-3p;hsa-miR-372-5p;NC_000013.11_28441;hsa-miR-30c-1-3p;hsa-miR-371b-3p;hsa-miR-92a-1-5p;hsa-miR-629-3p;NC_000007.14_17821;NC_000010.11_23646;NC_000012.12_25887;NC_000011.10_25384;NC_000018.10_33742;NC_000005.10_11919>NC_000005.10_11920;hsa-miR-302c-5p;hsa-miR-17-5p;NC_000013.11_27627;NC_000022.11_36437;hsa-miR-26a-1-3p;hsa-miR-1257;hsa-miR-7-5p;NC_000002.12_3238;NC_000015.1…
KLHL28	NR_038921	0.54	9.02695e-52	34	hsa-miR-25-5p;hsa-miR-372-5p;hsa-miR-30c-1-3p;NC_000008.11_19445;NC_000005.10_12588;NC_000021.9_35751;NC_000012.12_25887;NC_000011.10_25384;NC_000004.12_9892;hsa-miR-302c-5p;NC_000012.12_26286;hsa-miR-17-5p;NC_000022.11_36372;hsa-miR-1257;NC_000002.12_3238;NC_000003.12_7973;NC_000015.10_30316;hsa-miR-515-5p;NC_000020.11_35116;NC_000016.10_31157;NC_000018.10_33037;NT_187601.1_39493>NC_000014.9_292…
GLS	ENST00000281092	0.3	9.50049e-52	38	hsa-miR-934;hsa-miR-33b-3p;NC_000006.12_14671;hsa-miR-30c-1-3p;hsa-miR-498;hsa-miR-629-3p;NC_000021.9_35751;NC_000012.12_25887;NC_000011.10_25384;NC_000005.10_11919>NC_000005.10_11920;hsa-miR-302c-5p;NC_000006.12_15769;hsa-miR-34c-5p;NC_000013.11_27627;NC_000005.10_14158;hsa-miR-7-5p;NC_000003.12_7973;NC_000012.12_25503;hsa-miR-15b-3p;hsa-miR-345-5p;hsa-miR-3529-3p;NC_000020.11_35116;hsa-miR-517a…
IARS	ENST00000261530	0.22449	1.01415e-51	36	hsa-miR-33b-3p;hsa-miR-372-5p;hsa-miR-30c-1-3p;hsa-miR-498;hsa-miR-371b-3p;hsa-miR-92a-1-5p;NC_000007.14_17821;hsa-miR-1298-5p;NC_000010.11_23646;NC_000012.12_25887;hsa-miR-18a-3p;NC_000011.10_25384;NC_000018.10_33742;hsa-miR-17-5p;hsa-miR-34c-5p;NC_000005.10_14158;hsa-miR-1257;hsa-miR-7-5p;NC_000015.10_30316;hsa-miR-3529-3p;NC_000020.11_35116;NC_000003.12_7520;hsa-miR-517a-3p>hsa-miR-517b-3p;NC_…
KIF3A	ENST00000432045	0.6125	1.04688e-51	31	hsa-miR-372-5p;hsa-miR-30c-1-3p;NC_000008.11_19445;hsa-miR-498;hsa-miR-629-3p;NC_000012.12_25887;NC_000011.10_25384;NC_000004.12_9892;NC_000006.12_15769;hsa-miR-17-5p;NC_000022.11_36372;hsa-miR-26a-1-3p;hsa-miR-7-5p;hsa-miR-515-5p;NC_000003.12_7520;NC_000020.11_35116;hsa-miR-548d-3p;NC_000012.12_26721;NT_187601.1_39493>NC_000014.9_29213;hsa-miR-20a-5p;hsa-miR-302b-3p;hsa-miR-3143;hsa-miR-582-5p;h…
ANK2	NONHSAT205276	0.813559	1.10361e-51	36	hsa-miR-25-5p;hsa-miR-372-5p;NC_000013.11_28441;NC_000023.11_36905;hsa-miR-92a-1-5p;hsa-miR-7974;hsa-miR-518e-5p>hsa-miR-519a-5p>hsa-miR-519b-5p>hsa-miR-519c-5p>hsa-miR-522-5p>hsa-miR-523-5p;NC_000003.12_7276;hsa-miR-3662;NC_000007.14_17821;hsa-miR-510-5p;NC_000021.9_35751;NC_000011.10_25384;NC_000012.12_26286;NC_000006.12_15769;hsa-miR-34c-5p;NC_000013.11_27627;NC_000005.10_14158;hsa-miR-1257;NC…
TLDC1	ENST00000281092	0.285	1.15731e-51	39	NC_000001.11_2008;hsa-miR-934;hsa-miR-33b-3p;NC_000006.12_14671;hsa-miR-30c-1-3p;NC_000008.11_19445;hsa-miR-498;NC_000010.11_23303;hsa-miR-92a-1-5p;hsa-miR-629-3p;NC_000012.12_25887;hsa-miR-18a-3p;NC_000011.10_25384;NC_000005.10_11919>NC_000005.10_11920;NC_000006.12_15769;hsa-miR-17-5p;NC_000022.11_36372;hsa-miR-7-5p;NC_000001.11_3101;NC_000002.12_3238;NC_000011.10_25091;hsa-miR-15b-3p;hsa-miR-34…
INHBA	NONHSAT215932	0.428571	1.1802e-51	35	hsa-miR-934;hsa-miR-33b-3p;hsa-miR-372-5p;NC_000013.11_28441;hsa-miR-30c-1-3p;hsa-miR-7974;NC_000007.14_17821;NC_000021.9_35751;NC_000012.12_25887;hsa-miR-302c-5p;NC_000012.12_26286;NC_000006.12_15769;hsa-miR-17-5p;NC_000013.11_27627;hsa-miR-26a-1-3p;hsa-miR-1257;NC_000002.12_3238;NC_000008.11_20037*;NC_000011.10_25091;hsa-miR-519a-3p;NC_000003.12_7520;NC_000016.10_31157;NC_000012.12_26414;hsa-mi…
DNAJC10	ENST00000237264	0.6	1.1802e-51	35	NC_000006.12_14671;NC_000013.11_28441;NC_000008.11_19445;NC_000005.10_12588;hsa-miR-92a-1-5p;hsa-miR-7974;hsa-miR-1298-5p;NC_000012.12_25887;hsa-miR-18a-3p;NC_000011.10_25384;NC_000004.12_9892;hsa-miR-302c-5p;NC_000006.12_15769;hsa-miR-34c-5p;NC_000013.11_27627;NC_000022.11_36372;hsa-miR-26a-1-3p;hsa-miR-1257;hsa-miR-7-5p;NC_000003.12_7973;hsa-miR-519a-3p;NC_000020.11_35116;NC_000012.12_26414;NC_…
RPS6KA2	NR_038921	0.45	1.1802e-51	35	hsa-miR-372-5p;hsa-miR-30c-1-3p;NC_000008.11_19445;NC_000005.10_12588;hsa-miR-7974;hsa-miR-3662;NC_000007.14_17821;hsa-miR-1298-5p;NC_000021.9_35751;NC_000012.12_25887;NC_000005.10_11919>NC_000005.10_11920;NC_000009.12_21255;hsa-miR-302c-5p;NC_000012.12_26286;NC_000006.12_15769;hsa-miR-17-5p;NC_000013.11_27627;hsa-miR-26a-1-3p;hsa-miR-512-3p;NC_000015.10_30316;NC_000020.11_35116;hsa-miR-526b-5p;h…
NAB1	ENST00000261530	0.239796	1.20042e-51	37	NC_000001.11_2008;NC_000013.11_28441;hsa-miR-30c-1-3p;NC_000008.11_19445;NC_000007.14_17821;hsa-miR-1298-5p;NC_000021.9_35751;NC_000012.12_25887;NC_000018.10_33742;NC_000004.12_9892;hsa-miR-302c-5p;hsa-miR-17-5p;hsa-miR-34c-5p;NC_000013.11_27627;hsa-miR-1257;hsa-miR-7-5p;NC_000002.12_3238;NC_000003.12_7973;hsa-miR-519a-3p;hsa-miR-3529-3p;NC_000018.10_33037;hsa-miR-548d-3p;hsa-miR-296-3p;NT_187601…
KDM7A	ENST00000563635	0.635135	1.29913e-51	36	hsa-miR-934;hsa-miR-3155a;hsa-miR-498;NC_000008.11_19445;NC_000005.10_12588;NC_000003.12_8135;hsa-miR-3662;NC_000007.14_17821;NC_000021.9_35751;NC_000012.12_25887;hsa-miR-18a-3p;NC_000011.10_25384;NC_000004.12_9892;hsa-miR-302c-5p;NC_000006.12_15769;hsa-miR-17-5p;NC_000022.11_36372;hsa-miR-26a-1-3p;NC_000012.12_25503;NC_000015.10_30316;hsa-miR-512-3p;hsa-miR-3529-3p;hsa-miR-548d-3p;NC_000012.12_2…
TTN	ENST00000563635	0.797297	1.35732e-51	38	hsa-miR-934;hsa-miR-33b-3p;NC_000006.12_14671;hsa-miR-372-5p;NC_000013.11_28441;hsa-miR-3155a;NC_000003.12_7276;hsa-miR-3662;NC_000007.14_17821;NC_000021.9_35751;NC_000012.12_25887;hsa-miR-18a-3p;NC_000011.10_25384;NC_000004.12_9892;hsa-miR-302c-5p;NC_000006.12_15769;hsa-miR-17-5p;NC_000022.11_36372;NC_000022.11_36437;hsa-miR-26a-1-3p;NC_000001.11_3101;NC_000008.11_20037*;NC_000015.10_30316;hsa-m…
LYST	NONHSAT224112	0.746667	1.46714e-51	39	hsa-miR-372-5p;NC_000013.11_28441;NC_000008.11_19445;hsa-miR-498;NC_000010.11_23303;hsa-miR-92a-1-5p;hsa-miR-629-3p;hsa-miR-3662;NC_000007.14_17821;NC_000003.12_8583;NC_000012.12_25887;NC_000006.12_15769;NC_000013.11_27627;NC_000022.11_36372;NC_000022.11_36437;hsa-miR-26a-1-3p;hsa-miR-7-5p;hsa-miR-512-3p;hsa-miR-345-5p;NC_000020.11_35116;NC_000007.14_16719;NC_000016.10_31157;NC_000018.10_33037;NC…
KIF21B	ENST00000261530	0.27551	1.59681e-51	39	hsa-miR-33b-3p;hsa-miR-25-5p;hsa-miR-372-5p;hsa-miR-30c-1-3p;NC_000023.11_36905;NC_000010.11_23303;hsa-miR-371b-3p;hsa-miR-92a-1-5p;hsa-miR-629-3p;NC_000003.12_7276;NC_000007.14_17821;NC_000021.9_35751;NC_000012.12_25887;hsa-miR-18a-3p;NC_000005.10_11919>NC_000005.10_11920;hsa-miR-17-5p;hsa-miR-34c-5p;NC_000013.11_27627;NC_000005.10_14158;NC_000022.11_36437;hsa-miR-1257;hsa-miR-7-5p;NC_000002.12_…
PHLDA1	ENST00000263967	0.369863	1.61522e-51	37	hsa-miR-372-5p;NC_000013.11_28441;hsa-miR-30c-1-3p;hsa-miR-92a-1-5p;hsa-miR-7974;hsa-miR-629-3p;hsa-miR-3662;NC_000007.14_17821;NC_000010.11_23646;NC_000012.12_25887;NC_000011.10_25384;NC_000018.10_33742;NC_000005.10_11919>NC_000005.10_11920;NC_000006.12_15769;hsa-miR-17-5p;NC_000013.11_27627;NC_000022.11_36437;NC_000002.12_3238;hsa-miR-519a-3p;NC_000015.10_30316;hsa-miR-302b-5p;hsa-miR-345-5p;NC…
SLC16A6	ENST00000281092	0.26	1.61911e-51	35	hsa-miR-934;NC_000006.12_14671;hsa-miR-372-5p;hsa-miR-30c-1-3p;NC_000008.11_19445;hsa-miR-498;NC_000010.11_23303;hsa-miR-675-5p;NC_000005.10_12588;NC_000021.9_35751;NC_000012.12_25887;NC_000004.12_9892;hsa-miR-302c-5p;NC_000012.12_26286;NC_000006.12_15769;hsa-miR-17-5p;hsa-miR-34c-5p;NC_000013.11_27627;NC_000022.11_36372;NC_000008.11_20037*;NC_000003.12_7973;hsa-miR-15b-3p;hsa-miR-515-5p;NC_00000…
C11orf54	NR_033268	0.440367	1.63318e-51	37	hsa-miR-371a-5p;hsa-miR-372-5p;hsa-miR-30c-1-3p;NC_000023.11_36905;NC_000010.11_23303;hsa-miR-518b;hsa-miR-7974;hsa-miR-629-3p;NC_000007.14_17821;hsa-miR-510-5p;NC_000010.11_23646;hsa-miR-18a-3p;hsa-miR-302c-5p;NC_000012.12_26286;NC_000006.12_15769;hsa-miR-17-5p;NC_000022.11_36372;hsa-miR-26a-1-3p;hsa-miR-7-5p;NC_000001.11_3101;NC_000002.12_3238;NC_000003.12_9133;hsa-miR-512-3p;NC_000020.11_35116…
RPS6KA2	ENST00000281092	0.275	1.64775e-51	37	NC_000006.12_14671;hsa-miR-372-5p;hsa-miR-30c-1-3p;NC_000008.11_19445;NC_000010.11_23303;NC_000005.10_12588;hsa-miR-92a-1-5p;hsa-miR-629-3p;hsa-miR-1298-5p;NC_000021.9_35751;NC_000012.12_25887;hsa-miR-18a-3p;NC_000005.10_11919>NC_000005.10_11920;hsa-miR-302c-5p;NC_000012.12_26286;NC_000006.12_15769;hsa-miR-17-5p;NC_000013.11_27627;hsa-miR-26a-1-3p;hsa-miR-3529-3p;NC_000003.12_7520;NC_000020.11_35…
MEF2A	ENST00000432045	0.675	1.74576e-51	35	NC_000006.12_14671;hsa-miR-372-5p;hsa-miR-30c-1-3p;NC_000008.11_19445;hsa-miR-498;NC_000003.12_7276;hsa-miR-629-3p;NC_000012.12_25887;hsa-miR-18a-3p;NC_000011.10_25384;NC_000004.12_9892;NC_000009.12_21255;NC_000006.12_15769;hsa-miR-17-5p;NC_000022.11_36372;hsa-miR-26a-1-3p;hsa-miR-1257;hsa-miR-7-5p;NC_000011.10_25091;hsa-miR-515-5p;NC_000003.12_7520;NC_000020.11_35116;hsa-miR-548d-3p;NC_000012.12…
RHBDD1	ENST00000261530	0.30102	1.77756e-51	40	NC_000006.12_14671;NC_000013.11_28441;hsa-miR-30c-1-3p;NC_000008.11_19445;NC_000023.11_36905;hsa-miR-92a-1-5p;hsa-miR-629-3p;NC_000003.12_7276;NC_000007.14_17821;hsa-miR-27b-5p;hsa-miR-18a-3p;NC_000011.10_25384;NC_000018.10_33742;hsa-miR-302c-5p;hsa-miR-34c-5p;NC_000006.12_15809;NC_000013.11_27627;NC_000022.11_36437;hsa-miR-1257;hsa-miR-26a-1-3p;hsa-miR-7-5p;NC_000002.12_3238;NC_000003.12_7973;NC…
NAB1	ENST00000263967	0.335616	1.94193e-51	35	NC_000013.11_28441;hsa-miR-30c-1-3p;hsa-miR-7974;NC_000007.14_17821;hsa-miR-3662;NC_000012.12_25887;NC_000004.12_10500;NC_000018.10_33742;NC_000004.12_9892;hsa-miR-302c-5p;NC_000006.12_15769;hsa-miR-17-5p;NC_000013.11_27627;hsa-miR-1257;hsa-miR-7-5p;NC_000002.12_3238;NC_000011.10_25091;hsa-miR-519a-3p;NC_000016.10_31157;NC_000018.10_33037;NC_000012.12_26721;hsa-miR-296-3p;NT_187601.1_39493>NC_000…
TTBK2	ENST00000237264	0.588235	2.06377e-51	38	hsa-miR-33b-3p;NC_000005.10_12140;NC_000008.11_19445;hsa-miR-92a-1-5p;hsa-miR-7974;hsa-miR-518e-5p>hsa-miR-519a-5p>hsa-miR-519b-5p>hsa-miR-519c-5p>hsa-miR-522-5p>hsa-miR-523-5p;hsa-miR-3662;hsa-miR-510-5p;hsa-miR-27b-5p;NC_000012.12_25887;hsa-miR-18a-3p;NC_000011.10_25384;NC_000005.10_11919>NC_000005.10_11920;hsa-miR-302c-5p;NC_000006.12_15769;hsa-miR-34c-5p;NC_000022.11_36437;hsa-miR-26a-1-3p;hs…
LYST	ENST00000432045	0.775	2.17574e-51	36	NC_000006.12_14671;hsa-miR-25-5p;hsa-miR-372-5p;hsa-miR-30c-1-3p;hsa-miR-498;NC_000008.11_19445;hsa-miR-629-3p;NC_000012.12_25887;NC_000011.10_25384;NC_000009.12_21255;NC_000006.12_15769;hsa-miR-17-5p;hsa-miR-34c-5p;NC_000022.11_36372;hsa-miR-26a-1-3p;hsa-miR-7-5p;NC_000008.11_20037*;hsa-miR-515-5p;NC_000003.12_7520;NC_000020.11_35116;hsa-miR-548d-3p;NC_000012.12_26721;hsa-miR-296-3p;NT_187601.1_…
AUTS2	ENST00000281092	0.45	2.28614e-51	43	hsa-miR-934;hsa-miR-33b-3p;hsa-miR-372-5p;hsa-miR-30c-1-3p;NC_000010.11_23303;hsa-miR-92a-1-5p;hsa-miR-1298-5p;hsa-miR-27b-5p;NC_000021.9_35751;NC_000012.12_25887;hsa-miR-18a-3p;NC_000011.10_25384;NC_000005.10_11919>NC_000005.10_11920;hsa-miR-302c-5p;NC_000012.12_26286;NC_000006.12_15769;hsa-miR-34c-5p;NC_000013.11_27627;NC_000005.10_14158;hsa-miR-1257;hsa-miR-26a-1-3p;hsa-miR-7-5p;NC_000001.11_3…
SH2B3	ENST00000281092	0.335	2.40714e-51	40	hsa-miR-934;hsa-miR-33b-3p;NC_000006.12_14671;hsa-miR-30c-1-3p;NC_000010.11_23303;hsa-miR-371b-3p;hsa-miR-92a-1-5p;hsa-miR-27b-5p;NC_000012.12_25887;hsa-miR-18a-3p;NC_000005.10_11919>NC_000005.10_11920;NC_000012.12_26286;NC_000006.12_15769;hsa-miR-17-5p;NC_000022.11_36372;NC_000005.10_14158;hsa-miR-26a-1-3p;hsa-miR-7-5p;NC_000002.12_3238;NC_000008.11_20037*;NC_000003.12_7973;NC_000012.12_25503;hs…
KANSL1L	ENST00000261530	0.357143	2.5517e-51	35	hsa-miR-372-5p;hsa-miR-30c-1-3p;NC_000023.11_36905;NC_000003.12_7276;hsa-miR-629-3p;NC_000012.12_25887;hsa-miR-18a-3p;NC_000011.10_25384;NC_000018.10_33742;NC_000005.10_11919>NC_000005.10_11920;hsa-miR-17-5p;NC_000013.11_27627;hsa-miR-7-5p;NC_000003.12_7973;NC_000012.12_25503;hsa-miR-519a-3p;NC_000015.10_30316;hsa-miR-345-5p;hsa-miR-3529-3p;NC_000003.12_7520;hsa-miR-517a-3p>hsa-miR-517b-3p;NC_000…
RHBDD1	ENST00000237264	0.541176	2.76258e-51	37	NC_000006.12_14671;NC_000013.11_28441;NC_000005.10_12140;NC_000008.11_19445;hsa-miR-675-5p;hsa-miR-92a-1-5p;hsa-miR-7974;hsa-miR-3662;hsa-miR-510-5p;hsa-miR-27b-5p;hsa-miR-18a-3p;NC_000011.10_25384;hsa-miR-302c-5p;NC_000006.12_15769;hsa-miR-34c-5p;NC_000006.12_15809;NC_000013.11_27627;NC_000022.11_36372;NC_000022.11_36437;hsa-miR-1257;hsa-miR-26a-1-3p;hsa-miR-7-5p;NC_000002.12_3238;NC_000003.12_7…
AUTS2	NONHSAT205276	0.830508	3.12607e-51	35	hsa-miR-372-5p;NC_000023.11_36905;hsa-miR-92a-1-5p;hsa-miR-7974;hsa-miR-518e-5p>hsa-miR-519a-5p>hsa-miR-519b-5p>hsa-miR-519c-5p>hsa-miR-522-5p>hsa-miR-523-5p;NC_000003.12_7276;hsa-miR-3662;hsa-miR-510-5p;NC_000007.14_17821;NC_000021.9_35751;hsa-miR-302a-5p;NC_000011.10_25384;NC_000012.12_26286;NC_000006.12_15769;hsa-miR-34c-5p;NC_000013.11_27627;NC_000005.10_14158;hsa-miR-1257;NC_000002.12_3238;N…
AUTS2	lnc-LY86-6:2	0.78125	3.12607e-51	35	hsa-miR-33b-3p;hsa-miR-372-5p;NC_000010.11_23303;hsa-miR-92a-1-5p;hsa-miR-7974;hsa-miR-518e-5p>hsa-miR-519a-5p>hsa-miR-519b-5p>hsa-miR-519c-5p>hsa-miR-522-5p>hsa-miR-523-5p;NC_000003.12_7276;hsa-miR-3662;hsa-miR-510-5p;NC_000007.14_17821;NC_000003.12_8583;hsa-miR-27b-5p;NC_000010.11_23646;NC_000011.10_25384;NC_000005.10_11919>NC_000005.10_11920;NC_000012.12_26286;NC_000006.12_15769;hsa-miR-34c-5p…
CPPED1	ENST00000432045	0.6	3.19699e-51	31	hsa-miR-30c-1-3p;NC_000008.11_19445;hsa-miR-498;NC_000003.12_7276;hsa-miR-629-3p;NC_000012.12_25887;hsa-miR-18a-3p;NC_000011.10_25384;NC_000004.12_9892;NC_000006.12_15769;hsa-miR-17-5p;hsa-miR-34c-5p;hsa-miR-26a-1-3p;hsa-miR-1257;hsa-miR-7-5p;hsa-miR-515-5p;NC_000003.12_7520;NC_000020.11_35116;hsa-miR-548d-3p;NT_187601.1_39493>NC_000014.9_29213;hsa-miR-20a-5p;hsa-miR-302b-3p;hsa-miR-582-5p;hsa-mi…
ZNF704	lnc-ITGA1-1:1	0.839286	3.32649e-51	34	NC_000013.11_28441;hsa-miR-30c-1-3p;NC_000005.10_12140;NC_000023.11_36905;hsa-miR-92a-1-5p;hsa-miR-7974;hsa-miR-629-3p;hsa-miR-3662;hsa-miR-27b-5p;NC_000021.9_35751;NC_000012.12_25887;NC_000004.12_10500;NC_000011.10_25384;NC_000018.10_33742;NC_000004.12_9892;NC_000012.12_26286;NC_000006.12_15769;hsa-miR-34c-5p;NC_000022.11_36437;hsa-miR-1257;NC_000001.11_3101;NC_000003.12_7973;NC_000015.10_30316;…
DNAJC10	ENST00000432045	0.6375	3.3408e-51	32	NC_000006.12_14671;hsa-miR-372-5p;hsa-miR-30c-1-3p;NC_000008.11_19445;hsa-miR-498;NC_000003.12_7276;NC_000012.12_25887;hsa-miR-18a-3p;NC_000011.10_25384;NC_000004.12_9892;NC_000006.12_15769;hsa-miR-17-5p;hsa-miR-34c-5p;NC_000022.11_36372;hsa-miR-26a-1-3p;hsa-miR-1257;hsa-miR-7-5p;NC_000020.11_35116;hsa-miR-548d-3p;NT_187601.1_39493>NC_000014.9_29213;hsa-miR-20a-5p;hsa-miR-302b-3p;hsa-miR-3143;hsa…
UBR3	NR_038921	0.51	3.44708e-51	35	NC_000001.11_2008;hsa-miR-372-5p;NC_000013.11_28441;hsa-miR-30c-1-3p;NC_000005.10_12588;hsa-miR-7974;NC_000012.12_25887;NC_000011.10_25384;NC_000005.10_11919>NC_000005.10_11920;NC_000004.12_9892;hsa-miR-302c-5p;NC_000012.12_26286;NC_000006.12_15769;hsa-miR-17-5p;NC_000013.11_27627;hsa-miR-1257;NC_000002.12_3238;NC_000003.12_7973;NC_000015.10_30316;hsa-miR-515-5p;NC_000020.11_35116;NC_000016.10_31…
CTAGE5	NR_003268	0.673469	3.45905e-51	30	hsa-miR-372-5p;hsa-miR-3155a;NC_000005.10_12140;hsa-miR-518e-5p>hsa-miR-519a-5p>hsa-miR-519b-5p>hsa-miR-519c-5p>hsa-miR-522-5p>hsa-miR-523-5p;hsa-miR-3662;NC_000004.12_10500;NC_000011.10_25384;NC_000009.12_21255;hsa-miR-17-5p;hsa-miR-34c-5p;NC_000022.11_36372;NC_000022.11_36437;NC_000002.12_3238;NC_000003.12_9133;NC_000011.10_25091;hsa-miR-512-3p;hsa-miR-302b-5p;hsa-miR-345-5p;NC_000012.12_26414;…
ANK2	NR_033856	0.843137	3.49835e-51	35	NC_000009.12_21574;hsa-miR-25-5p;hsa-miR-372-5p;NC_000013.11_28441;NC_000023.11_36905;hsa-miR-371b-3p;hsa-miR-3662;NC_000010.11_23646;NC_000005.10_11919>NC_000005.10_11920;hsa-miR-302c-5p;hsa-miR-17-5p;NC_000013.11_27627;NC_000022.11_36372;hsa-miR-7-5p;NC_000001.11_3101;NC_000002.12_3238;NC_000003.12_9133;NC_000003.12_7973;hsa-miR-520a-3p;NC_000012.12_25503;hsa-miR-512-3p;hsa-miR-15b-3p;hsa-miR-3…
HIPK2	NONHSAT219565	0.830189	3.57634e-51	37	hsa-miR-934;NC_000006.12_14671;NC_000013.11_28441;NC_000008.11_19445;NC_000023.11_36905;hsa-miR-498;hsa-miR-3662;hsa-miR-510-5p;hsa-miR-302a-5p;NC_000003.12_8583;NC_000011.10_25384;NC_000009.12_21255;hsa-miR-17-5p;hsa-miR-34c-5p;NC_000022.11_36372;NC_000002.12_3238;NC_000003.12_9133;NC_000003.12_7973;NC_000018.10_33480;NC_000011.10_25091;hsa-miR-519a-3p;NC_000015.10_30316;hsa-miR-15b-3p;hsa-miR-3…
KIAA1033	ENST00000281092	0.285	3.83606e-51	34	NC_000001.11_2008;hsa-miR-33b-3p;hsa-miR-372-5p;NC_000008.11_19445;NC_000010.11_23303;hsa-miR-629-3p;NC_000012.12_25887;NC_000004.12_9892;NC_000012.12_26286;NC_000006.12_15769;hsa-miR-17-5p;hsa-miR-34c-5p;NC_000022.11_36372;hsa-miR-26a-1-3p;hsa-miR-7-5p;NC_000008.11_20037*;NC_000011.10_25091;hsa-miR-3529-3p;hsa-miR-515-5p;NC_000003.12_7520;hsa-miR-517a-3p>hsa-miR-517b-3p;NC_000018.10_33037;hsa-mi…
GPCPD1	NR_033268	0.513761	3.99577e-51	39	hsa-miR-371a-5p;hsa-miR-372-5p;NC_000013.11_28441;NC_000009.12_20733;hsa-miR-30c-1-3p;NC_000023.11_36905;hsa-miR-371b-3p;hsa-miR-7974;hsa-miR-510-5p;NC_000012.12_25887;hsa-miR-18a-3p;hsa-miR-302c-5p;NC_000012.12_26286;NC_000006.12_15769;hsa-miR-17-5p;NC_000022.11_36372;NC_000005.10_14158;hsa-miR-26a-1-3p;NC_000001.11_3101;NC_000002.12_3238;NC_000003.12_9133;hsa-miR-520a-3p;NC_000023.11_38289;hsa-…
DENND4A	NR_033268	0.46789	3.99577e-51	39	hsa-miR-934;NC_000013.11_28441;hsa-miR-30c-1-3p;NC_000023.11_36905;hsa-miR-371b-3p;NC_000010.11_23303;hsa-miR-518e-5p>hsa-miR-519a-5p>hsa-miR-519b-5p>hsa-miR-519c-5p>hsa-miR-522-5p>hsa-miR-523-5p;hsa-miR-629-3p;NC_000007.14_17821;hsa-miR-1298-5p;NC_000010.11_23646;NC_000021.9_35751;NC_000012.12_25887;NC_000012.12_26286;NC_000006.12_15769;hsa-miR-17-5p;hsa-miR-26a-1-3p;NC_000005.10_14158;hsa-miR-7…
CHD2	ENST00000263967	0.321918	4.05448e-51	33	hsa-miR-934;hsa-miR-33b-3p;hsa-miR-372-5p;hsa-miR-498;hsa-miR-371b-3p;hsa-miR-92a-1-5p;hsa-miR-7974;NC_000012.12_25887;NC_000011.10_25384;NC_000009.12_21255;hsa-miR-302c-5p;NC_000006.12_15769;hsa-miR-17-5p;NC_000013.11_27627;hsa-miR-1257;hsa-miR-7-5p;NC_000002.12_3238;NC_000011.10_25091;hsa-miR-519a-3p;hsa-miR-15b-3p;hsa-miR-345-5p;NC_000003.12_7520;NC_000012.12_26414;NT_187601.1_39493>NC_000014.…
TLDC1	ENST00000263967	0.342466	4.07057e-51	37	hsa-miR-934;hsa-miR-33b-3p;hsa-miR-30c-1-3p;hsa-miR-498;hsa-miR-92a-1-5p;hsa-miR-7974;hsa-miR-629-3p;NC_000010.11_23646;NC_000012.12_25887;NC_000004.12_10500;NC_000011.10_25384;NC_000018.10_33742;NC_000005.10_11919>NC_000005.10_11920;NC_000006.12_15769;hsa-miR-17-5p;NC_000022.11_36437;hsa-miR-7-5p;NC_000002.12_3238;NC_000011.10_25091;hsa-miR-519a-3p;NC_000015.10_30316;hsa-miR-15b-3p;hsa-miR-345-5…
PDP1	ENST00000261530	0.229592	4.2735e-51	36	hsa-miR-934;NC_000006.12_14671;hsa-miR-372-5p;NC_000008.11_19445;NC_000023.11_36905;NC_000010.11_23303;hsa-miR-371b-3p;NC_000005.10_12588;hsa-miR-629-3p;NC_000007.14_17821;hsa-miR-1298-5p;NC_000021.9_35751;hsa-miR-18a-3p;NC_000011.10_25384;NC_000018.10_33742;NC_000004.12_9892;hsa-miR-302c-5p;hsa-miR-1257;hsa-miR-26a-1-3p;hsa-miR-7-5p;NC_000002.12_3238;NC_000012.12_25503;hsa-miR-519a-3p;NC_000015.…
CPEB2	NONHSAT215932	0.428571	4.40932e-51	38	hsa-miR-934;hsa-miR-33b-3p;NC_000013.11_28441;hsa-miR-30c-1-3p;hsa-miR-498;NC_000023.11_36905;hsa-miR-92a-1-5p;hsa-miR-7974;hsa-miR-518e-5p>hsa-miR-519a-5p>hsa-miR-519b-5p>hsa-miR-519c-5p>hsa-miR-522-5p>hsa-miR-523-5p;NC_000007.14_17821;NC_000010.11_23646;NC_000011.10_25384;hsa-miR-302c-5p;hsa-miR-17-5p;hsa-miR-34c-5p;NC_000005.10_14158;hsa-miR-26a-1-3p;NC_000002.12_3238;NC_000003.12_9133;NC_0000…
TTN	ENST00000565390	0.933333	4.59285e-51	33	NC_000001.11_2008;hsa-miR-30c-1-3p;NC_000010.11_23303;hsa-miR-629-3p;NC_000003.12_7276;hsa-miR-3662;hsa-miR-27b-5p;NC_000012.12_25887;NC_000021.9_35751;NC_000004.12_10500;NC_000018.10_33742;NC_000005.10_11919>NC_000005.10_11920;hsa-miR-302c-5p;NC_000006.12_15769;NC_000022.11_36372;NC_000005.10_14158;NC_000022.11_36437;hsa-miR-1257;NC_000002.12_3238;hsa-miR-15b-3p;hsa-miR-302b-5p;hsa-miR-3529-3p;N…
KCNMA1	ENST00000261530	0.352041	4.66033e-51	34	hsa-miR-33b-3p;hsa-miR-372-5p;hsa-miR-30c-1-3p;NC_000008.11_19445;NC_000023.11_36905;hsa-miR-498;NC_000003.12_7276;hsa-miR-1298-5p;NC_000012.12_25887;NC_000011.10_25384;NC_000018.10_33742;NC_000005.10_11919>NC_000005.10_11920;hsa-miR-34c-5p;NC_000006.12_15809;hsa-miR-26a-1-3p;hsa-miR-1257;hsa-miR-519a-3p;hsa-miR-345-5p;hsa-miR-3529-3p;hsa-miR-515-5p;hsa-miR-548d-3p;hsa-miR-296-3p;hsa-miR-302b-3p;…
ATP2B4	ENST00000568777	0.613636	4.8195e-51	37	NC_000001.11_2008;hsa-miR-934;hsa-miR-372-5p;NC_000013.11_28441;hsa-miR-30c-1-3p;hsa-miR-371b-3p;hsa-miR-675-5p;hsa-miR-92a-1-5p;NC_000005.10_12588;hsa-miR-629-3p;NC_000010.11_23646;NC_000003.12_8583;NC_000012.12_25887;hsa-miR-18a-3p;NC_000018.10_33742;NC_000004.12_9892;NC_000006.12_15769;hsa-miR-34c-5p;hsa-miR-26a-1-3p;hsa-miR-7-5p;NC_000002.12_3238;NC_000003.12_7973;NC_000011.10_25091;hsa-miR-5…
PRKG2	NR_033268	0.449541	5.31303e-51	38	hsa-miR-371a-5p;hsa-miR-372-5p;NC_000013.11_28441;hsa-miR-30c-1-3p;hsa-miR-371b-3p;hsa-miR-92a-1-5p;hsa-miR-518b;hsa-miR-7974;hsa-miR-629-3p;NC_000007.14_17821;hsa-miR-302a-5p;NC_000010.11_23646;NC_000003.12_8583;NC_000012.12_25887;NC_000004.12_9958;hsa-miR-302c-5p;NC_000006.12_15769;NC_000022.11_36372;hsa-miR-26a-1-3p;NC_000001.11_3101;NC_000002.12_3238;NC_000003.12_9133;hsa-miR-520a-3p;hsa-miR-…
SLC38A1	ENST00000563635	0.648649	6.11064e-51	36	hsa-miR-934;hsa-miR-33b-3p;NC_000006.12_14671;hsa-miR-372-5p;NC_000013.11_28441;hsa-miR-3155a;NC_000008.11_19445;NC_000003.12_7276;hsa-miR-3662;NC_000012.12_25887;NC_000011.10_25384;NC_000004.12_9892;hsa-miR-302c-5p;NC_000006.12_15769;hsa-miR-17-5p;NC_000022.11_36372;hsa-miR-26a-1-3p;NC_000001.11_3101;NC_000012.12_25503;hsa-miR-519a-3p;NC_000015.10_30316;hsa-miR-512-3p;hsa-miR-3529-3p;hsa-miR-548…
DENND2C	ENST00000263967	0.342466	6.13302e-51	35	hsa-miR-934;hsa-miR-372-5p;NC_000013.11_28441;hsa-miR-30c-1-3p;hsa-miR-92a-1-5p;NC_000012.12_25887;NC_000006.12_15769;hsa-miR-17-5p;NC_000013.11_27627;hsa-miR-1257;NC_000022.11_36437;hsa-miR-7-5p;NC_000002.12_3238;NC_000011.10_25091;hsa-miR-302b-5p;hsa-miR-345-5p;NC_000020.11_35116;NC_000003.12_7520;NC_000016.10_31157;NC_000012.12_26414;NC_000018.10_33037;NC_000012.12_26721;hsa-miR-296-3p;hsa-miR…
ASB7	ENST00000281092	0.24	6.23245e-51	33	hsa-miR-934;hsa-miR-372-5p;hsa-miR-30c-1-3p;hsa-miR-498;NC_000008.11_19445;NC_000010.11_23303;hsa-miR-675-5p;hsa-miR-629-3p;NC_000012.12_25887;NC_000021.9_35751;NC_000004.12_9892;NC_000006.12_15769;hsa-miR-17-5p;NC_000022.11_36372;hsa-miR-7-5p;NC_000003.12_7973;hsa-miR-345-5p;hsa-miR-3529-3p;hsa-miR-515-5p;NC_000003.12_7520;NC_000018.10_33037;hsa-miR-548d-3p;NC_000012.12_26721;NT_187601.1_39493>N…
KDM7A	NONHSAT215932	0.504202	6.36615e-51	37	hsa-miR-934;hsa-miR-498;NC_000010.11_23303;hsa-miR-92a-1-5p;NC_000007.14_17821;NC_000010.11_23646;NC_000021.9_35751;NC_000012.12_25887;NC_000011.10_25384;NC_000005.10_11919>NC_000005.10_11920;hsa-miR-302c-5p;NC_000006.12_15769;hsa-miR-17-5p;hsa-miR-34c-5p;hsa-miR-26a-1-3p;NC_000005.10_14158;NC_000002.12_3238;NC_000003.12_9133;NC_000003.12_7973;NC_000015.10_30316;hsa-miR-15b-3p;NC_000003.12_7520;N…
GPCPD1	NR_038921	0.59	6.36615e-51	37	hsa-miR-25-5p;hsa-miR-372-5p;NC_000013.11_28441;hsa-miR-30c-1-3p;NC_000008.11_19445;hsa-miR-371b-3p;hsa-miR-7974;hsa-miR-3662;NC_000012.12_25887;NC_000011.10_25384;hsa-miR-302c-5p;NC_000012.12_26286;NC_000006.12_15769;hsa-miR-17-5p;NC_000006.12_15809;NC_000013.11_27627;NC_000022.11_36372;hsa-miR-1257;hsa-miR-26a-1-3p;NC_000001.11_3101;NC_000002.12_3238;NC_000003.12_7973;hsa-miR-512-3p;NC_000016.1…
PPARA	ENST00000263967	0.438356	7.13682e-51	39	hsa-miR-33b-3p;NC_000013.11_28441;hsa-miR-30c-1-3p;hsa-miR-92a-1-5p;hsa-miR-7974;hsa-miR-629-3p;hsa-miR-3662;NC_000010.11_23646;NC_000012.12_25887;NC_000004.12_10500;NC_000011.10_25384;NC_000005.10_11919>NC_000005.10_11920;hsa-miR-302c-5p;NC_000006.12_15769;hsa-miR-17-5p;NC_000013.11_27627;NC_000022.11_36437;hsa-miR-26a-1-3p;hsa-miR-1257;hsa-miR-7-5p;NC_000002.12_3238;hsa-miR-15b-3p;hsa-miR-302b-…
HIVEP2	NONHSAT224112	0.626667	7.2145e-51	37	hsa-miR-372-5p;hsa-miR-3155a;NC_000013.11_28441;NC_000008.11_19445;hsa-miR-498;NC_000010.11_23303;hsa-miR-92a-1-5p;hsa-miR-3662;NC_000007.14_17821;NC_000003.12_8583;NC_000012.12_25887;hsa-miR-18a-3p;NC_000004.12_10500;NC_000006.12_15769;NC_000013.11_27627;NC_000022.11_36372;NC_000022.11_36437;hsa-miR-26a-1-3p;hsa-miR-7-5p;hsa-miR-512-3p;hsa-miR-345-5p;NC_000020.11_35116;NC_000007.14_16719;NC_0000…
VCPIP1	XR_428151	0.714286	8.51102e-51	31	hsa-miR-934;hsa-miR-33b-3p;hsa-miR-30c-1-3p;NC_000008.11_19445;hsa-miR-498;hsa-miR-18a-3p;NC_000011.10_25384;NC_000018.10_33742;NC_000004.12_9892;NC_000006.12_15769;hsa-miR-17-5p;hsa-miR-34c-5p;NC_000022.11_36372;hsa-miR-1257;NC_000002.12_3238;NC_000003.12_7973;NC_000011.10_25091;NC_000015.10_30316;hsa-miR-3529-3p;hsa-miR-515-5p;hsa-miR-548d-3p;hsa-miR-296-3p;NT_187601.1_39493>NC_000014.9_29213;h…
GALNT5	ENST00000563635	0.675676	8.66637e-51	38	hsa-miR-33b-3p;NC_000006.12_14671;hsa-miR-372-5p;NC_000013.11_28441;NC_000008.11_19445;hsa-miR-518e-5p>hsa-miR-519a-5p>hsa-miR-519b-5p>hsa-miR-519c-5p>hsa-miR-522-5p>hsa-miR-523-5p;hsa-miR-3662;NC_000007.14_17821;hsa-miR-302a-5p;NC_000003.12_8583;NC_000012.12_25887;hsa-miR-18a-3p;NC_000011.10_25384;hsa-miR-302c-5p;NC_000006.12_15769;hsa-miR-17-5p;NC_000022.11_36372;NC_000022.11_36437;hsa-miR-26a-…
GALNT5	ENST00000568777	0.625	8.66637e-51	38	hsa-miR-33b-3p;hsa-miR-372-5p;NC_000013.11_28441;hsa-miR-30c-1-3p;hsa-miR-371b-3p;hsa-miR-92a-1-5p;hsa-miR-518e-5p>hsa-miR-519a-5p>hsa-miR-519b-5p>hsa-miR-519c-5p>hsa-miR-522-5p>hsa-miR-523-5p;hsa-miR-629-3p;NC_000010.11_23646;NC_000003.12_8583;NC_000012.12_25887;hsa-miR-18a-3p;NC_000018.10_33742;hsa-miR-302c-5p;NC_000006.12_15769;hsa-miR-34c-5p;hsa-miR-26a-1-3p;hsa-miR-7-5p;NC_000001.11_3101;NC_…
GFPT1	ENST00000568777	0.511364	9.46431e-51	37	NC_000001.11_2008;hsa-miR-934;hsa-miR-33b-3p;hsa-miR-372-5p;hsa-miR-30c-1-3p;hsa-miR-371b-3p;hsa-miR-92a-1-5p;hsa-miR-629-3p;NC_000010.11_23646;NC_000003.12_8583;NC_000012.12_25887;hsa-miR-18a-3p;NC_000018.10_33742;NC_000004.12_9892;hsa-miR-302c-5p;NC_000006.12_15769;hsa-miR-34c-5p;hsa-miR-7-5p;NC_000001.11_3101;NC_000003.12_7973;NC_000012.12_25503;NC_000011.10_25091;hsa-miR-512-3p;hsa-miR-515-5p…
DOPEY2	NR_033268	0.422018	9.66557e-51	39	hsa-miR-372-5p;hsa-miR-3155a;hsa-miR-30c-1-3p;NC_000023.11_36905;NC_000010.11_23303;hsa-miR-371b-3p;hsa-miR-92a-1-5p;hsa-miR-518b;hsa-miR-7974;hsa-miR-518e-5p>hsa-miR-519a-5p>hsa-miR-519b-5p>hsa-miR-519c-5p>hsa-miR-522-5p>hsa-miR-523-5p;hsa-miR-1298-5p;hsa-miR-302a-5p;NC_000007.14_17821;NC_000021.9_35751;NC_000003.12_8583;hsa-miR-510-5p;NC_000010.11_23646;NC_000012.12_25887;hsa-miR-302c-5p;NC_000…
NR5A2	NR_038921	0.44	9.94084e-51	34	hsa-miR-372-5p;NC_000013.11_28441;NC_000008.11_19445;hsa-miR-7974;hsa-miR-3662;NC_000007.14_17821;hsa-miR-27b-5p;NC_000012.12_25887;NC_000011.10_25384;NC_000005.10_11919>NC_000005.10_11920;NC_000004.12_9892;NC_000009.12_21255;hsa-miR-302c-5p;NC_000006.12_15769;hsa-miR-1257;NC_000002.12_3238;NC_000003.12_7973;hsa-miR-512-3p;NC_000020.11_35116;NC_000018.10_33037;hsa-miR-548d-3p;hsa-miR-526b-5p;hsa-…
TTN	lnc-ITGA1-1:1	0.892857	1.01248e-50	34	NC_000013.11_28441;hsa-miR-30c-1-3p;NC_000005.10_12140;NC_000023.11_36905;hsa-miR-92a-1-5p;hsa-miR-7974;hsa-miR-629-3p;hsa-miR-3662;hsa-miR-27b-5p;NC_000021.9_35751;NC_000012.12_25887;NC_000004.12_10500;NC_000011.10_25384;NC_000018.10_33742;NC_000005.10_11919>NC_000005.10_11920;NC_000004.12_9892;NC_000012.12_26286;NC_000006.12_15769;hsa-miR-34c-5p;NC_000022.11_36437;hsa-miR-1257;NC_000001.11_3101…
ZBTB21	ENST00000432045	0.6	1.03602e-50	29	hsa-miR-30c-1-3p;NC_000008.11_19445;hsa-miR-498;hsa-miR-629-3p;NC_000012.12_25887;NC_000011.10_25384;NC_000004.12_9892;NC_000006.12_15769;hsa-miR-17-5p;hsa-miR-34c-5p;NC_000022.11_36372;hsa-miR-26a-1-3p;hsa-miR-7-5p;NC_000008.11_20037*;NC_000011.10_25091;hsa-miR-515-5p;NC_000020.11_35116;hsa-miR-548d-3p;hsa-miR-302b-3p;hsa-miR-20a-5p;hsa-miR-3143;hsa-miR-582-5p;hsa-miR-520c-3p;hsa-miR-373-5p;hsa-…
HIPK2	lnc-C6orf228-2:1	0.849057	1.07424e-50	35	NC_000006.12_14671;hsa-miR-372-5p;NC_000013.11_28441;hsa-miR-371b-3p;hsa-miR-518e-5p>hsa-miR-519a-5p>hsa-miR-519b-5p>hsa-miR-519c-5p>hsa-miR-522-5p>hsa-miR-523-5p;NC_000012.12_25887;NC_000003.12_8583;hsa-miR-18a-3p;NC_000004.12_9892;NC_000009.12_21255;NC_000006.12_15769;hsa-miR-17-5p;hsa-miR-34c-5p;NC_000003.12_9133;NC_000003.12_7973;NC_000018.10_33480;NC_000015.10_30316;hsa-miR-512-3p;hsa-miR-30…
TTN	NONHSAT217150	0.846154	1.07459e-50	35	hsa-miR-934;hsa-miR-33b-3p;hsa-miR-372-5p;hsa-miR-3155a;NC_000013.11_28441;hsa-miR-30c-1-3p;NC_000010.11_23303;hsa-miR-371b-3p;hsa-miR-629-3p;hsa-miR-3662;hsa-miR-27b-5p;NC_000021.9_35751;NC_000004.12_10500;NC_000011.10_25384;NC_000005.10_11919>NC_000005.10_11920;hsa-miR-17-5p;NC_000022.11_36372;NC_000005.10_14158;hsa-miR-1257;NC_000001.11_3101;NC_000002.12_3238;NC_000008.11_20037*;NC_000011.10_2…
ASPH	ENST00000568777	0.5	1.08089e-50	35	hsa-miR-934;hsa-miR-33b-3p;hsa-miR-372-5p;hsa-miR-30c-1-3p;hsa-miR-92a-1-5p;hsa-miR-518e-5p>hsa-miR-519a-5p>hsa-miR-519b-5p>hsa-miR-519c-5p>hsa-miR-522-5p>hsa-miR-523-5p;hsa-miR-629-3p;NC_000010.11_23646;NC_000012.12_25887;NC_000003.12_8583;NC_000018.10_33742;NC_000006.12_15769;hsa-miR-34c-5p;hsa-miR-26a-1-3p;hsa-miR-7-5p;NC_000001.11_3101;NC_000002.12_3238;NC_000012.12_25503;NC_000011.10_25091;h…
ZEB1	ENST00000568777	0.568182	1.21761e-50	34	hsa-miR-372-5p;NC_000013.11_28441;hsa-miR-30c-1-3p;hsa-miR-675-5p;hsa-miR-92a-1-5p;hsa-miR-518e-5p>hsa-miR-519a-5p>hsa-miR-519b-5p>hsa-miR-519c-5p>hsa-miR-522-5p>hsa-miR-523-5p;NC_000003.12_7276;hsa-miR-629-3p;NC_000012.12_25887;hsa-miR-18a-3p;NC_000018.10_33742;NC_000004.12_9892;hsa-miR-302c-5p;NC_000006.12_15769;hsa-miR-34c-5p;NC_000020.11_34925;hsa-miR-26a-1-3p;hsa-miR-7-5p;NC_000001.11_3101;N…
KLHL28	ENST00000263967	0.363014	1.2569e-50	34	hsa-miR-934;hsa-miR-372-5p;hsa-miR-30c-1-3p;hsa-miR-498;hsa-miR-629-3p;NC_000012.12_25887;NC_000011.10_25384;NC_000004.12_9892;hsa-miR-302c-5p;hsa-miR-17-5p;hsa-miR-1257;hsa-miR-7-5p;NC_000002.12_3238;NC_000015.10_30316;hsa-miR-15b-3p;NC_000003.12_7520;NC_000020.11_35116;NC_000016.10_31157;NC_000018.10_33037;NC_000012.12_26721;hsa-miR-296-3p;NT_187601.1_39493>NC_000014.9_29213;hsa-miR-20a-5p;hsa-…
FAM63B	ENST00000432045	0.5625	1.4846e-50	30	hsa-miR-25-5p;hsa-miR-372-5p;hsa-miR-30c-1-3p;hsa-miR-498;NC_000003.12_7276;hsa-miR-629-3p;NC_000012.12_25887;hsa-miR-18a-3p;NC_000011.10_25384;NC_000004.12_9892;NC_000009.12_21255;NC_000006.12_15769;hsa-miR-17-5p;NC_000022.11_36372;hsa-miR-1257;hsa-miR-515-5p;NC_000003.12_7520;NC_000020.11_35116;hsa-miR-548d-3p;NC_000012.12_26721;hsa-miR-302b-3p;hsa-miR-20a-5p;hsa-miR-3143;hsa-miR-582-5p;hsa-miR…
VTI1A	lnc-C6orf228-2:1	0.90566	1.72047e-50	35	NC_000006.12_14671;hsa-miR-372-5p;NC_000013.11_28441;hsa-miR-371b-3p;hsa-miR-518e-5p>hsa-miR-519a-5p>hsa-miR-519b-5p>hsa-miR-519c-5p>hsa-miR-522-5p>hsa-miR-523-5p;hsa-miR-629-3p;NC_000012.12_25887;NC_000003.12_8583;hsa-miR-18a-3p;NC_000004.12_9892;NC_000006.12_15769;hsa-miR-17-5p;hsa-miR-34c-5p;NC_000003.12_7973;NC_000018.10_33480;NC_000015.10_30316;hsa-miR-512-3p;hsa-miR-302b-5p;NC_000007.14_167…
KALRN	NONHSAT170697	0.943396	1.86501e-50	29	NC_000024.10_38844;hsa-miR-183-5p;NC_000010.11_22861;hsa-miR-26b-5p;NC_000002.12_3880;NC_000003.12_9115;hsa-miR-9-5p;hsa-miR-155-5p;NC_000011.10_23882;hsa-miR-193a-5p;NC_000008.11_18787;NC_000010.11_22289;hsa-miR-181c-5p;hsa-miR-30d-5p;NC_000011.10_24785;NC_000017.11_32431;hsa-miR-328-3p;hsa-miR-449c-5p;NC_000020.11_34751;NC_000014.9_29046;hsa-miR-181a-5p;hsa-miR-22-3p;hsa-miR-24-3p;hsa-miR-369-3…
FRAS1	NR_003587	0.680851	1.884e-50	33	hsa-miR-371a-5p;hsa-miR-3155a;NC_000005.10_12140;NC_000023.11_36905;NC_000010.11_23303;hsa-miR-371b-3p;hsa-miR-92a-1-5p;hsa-miR-7974;NC_000007.14_17821;hsa-miR-302a-5p;hsa-miR-510-5p;NC_000003.12_8583;hsa-miR-1298-5p;NC_000010.11_23646;NC_000021.9_35751;NC_000004.12_10500;NC_000005.10_11919>NC_000005.10_11920;hsa-miR-34c-5p;hsa-miR-7-5p;NC_000002.12_3238;NC_000015.10_30316;hsa-miR-15b-3p;hsa-miR-…
MAP3K2	NR_038921	0.65	1.92047e-50	38	hsa-miR-372-5p;NC_000013.11_28441;hsa-miR-30c-1-3p;hsa-miR-371b-3p;hsa-miR-3662;NC_000007.14_17821;hsa-miR-1298-5p;NC_000012.12_25887;NC_000011.10_25384;hsa-miR-302c-5p;NC_000012.12_26286;NC_000006.12_15769;hsa-miR-17-5p;NC_000013.11_27627;NC_000022.11_36372;hsa-miR-1257;hsa-miR-26a-1-3p;NC_000001.11_3101;NC_000002.12_3238;NC_000003.12_7973;NC_000015.10_30316;hsa-miR-512-3p;NC_000020.11_35116;NC_…
ADAM20	NONHSAT165427	0.746269	1.96242e-50	36	hsa-miR-934;hsa-miR-372-5p;hsa-miR-3155a;NC_000013.11_28441;NC_000005.10_12140;NC_000023.11_36905;hsa-miR-371b-3p;hsa-miR-7974;hsa-miR-518e-5p>hsa-miR-519a-5p>hsa-miR-519b-5p>hsa-miR-519c-5p>hsa-miR-522-5p>hsa-miR-523-5p;hsa-miR-3662;NC_000010.11_23646;NC_000012.12_25887;NC_000004.12_9958;NC_000011.10_25384;NC_000006.12_15769;hsa-miR-34c-5p;NC_000022.11_36437;hsa-miR-26a-1-3p;NC_000002.12_3238;NC…
HIPK2	NONHSAT123764	0.676471	2.0427e-50	36	hsa-miR-934;NC_000006.12_14671;hsa-miR-372-5p;NC_000013.11_28441;hsa-miR-30c-1-3p;NC_000005.10_12140;hsa-miR-371b-3p;hsa-miR-7974;NC_000003.12_7276;NC_000003.12_8583;NC_000021.9_35751;NC_000004.12_10500;NC_000011.10_25384;NC_000009.12_21255;hsa-miR-302c-5p;hsa-miR-17-5p;NC_000013.11_27627;NC_000022.11_36372;NC_000022.11_36437;NC_000002.12_3238;NC_000003.12_7973;NC_000018.10_33480;hsa-miR-519a-3p;…
TMEM181	NR_038921	0.48	2.05822e-50	33	hsa-miR-1323;hsa-miR-372-5p;hsa-miR-30c-1-3p;NC_000008.11_19445;hsa-miR-518e-5p>hsa-miR-519a-5p>hsa-miR-519b-5p>hsa-miR-519c-5p>hsa-miR-522-5p>hsa-miR-523-5p;NC_000007.14_17821;hsa-miR-1298-5p;NC_000012.12_25887;NC_000004.12_9892;NC_000009.12_21255;hsa-miR-302c-5p;NC_000006.12_15769;hsa-miR-17-5p;NC_000013.11_27627;NC_000022.11_36372;hsa-miR-1257;NC_000002.12_3238;NC_000003.12_7973;hsa-miR-515-5p…
PDLIM5	ENST00000281092	0.32	2.24007e-50	38	NC_000006.12_14671;hsa-miR-372-5p;NC_000008.11_19445;hsa-miR-675-5p;hsa-miR-92a-1-5p;hsa-miR-629-3p;hsa-miR-27b-5p;NC_000021.9_35751;NC_000012.12_25887;NC_000011.10_25384;hsa-miR-302c-5p;NC_000012.12_26286;NC_000006.12_15769;hsa-miR-17-5p;hsa-miR-34c-5p;NC_000013.11_27627;NC_000022.11_36372;NC_000005.10_14158;hsa-miR-1257;hsa-miR-26a-1-3p;NC_000001.11_3101;NC_000002.12_3238;NC_000011.10_25091;hsa…
SLC38A1	NR_033268	0.440367	2.2887e-50	39	hsa-miR-934;hsa-miR-372-5p;hsa-miR-3155a;NC_000013.11_28441;hsa-miR-30c-1-3p;NC_000023.11_36905;hsa-miR-371b-3p;hsa-miR-92a-1-5p;hsa-miR-7974;NC_000003.12_7276;hsa-miR-629-3p;NC_000012.12_25887;hsa-miR-302c-5p;NC_000006.12_15769;hsa-miR-17-5p;NC_000022.11_36372;hsa-miR-26a-1-3p;hsa-miR-7-5p;NC_000001.11_3101;NC_000002.12_3238;NC_000011.10_25091;hsa-miR-512-3p;hsa-miR-302b-5p;hsa-miR-345-5p;NC_000…
ZEB1	NR_038921	0.6	2.65095e-50	35	hsa-miR-372-5p;NC_000013.11_28441;hsa-miR-30c-1-3p;NC_000008.11_19445;hsa-miR-518e-5p>hsa-miR-519a-5p>hsa-miR-519b-5p>hsa-miR-519c-5p>hsa-miR-522-5p>hsa-miR-523-5p;hsa-miR-1298-5p;NC_000021.9_35751;NC_000012.12_25887;NC_000011.10_25384;NC_000004.12_9892;hsa-miR-302c-5p;NC_000012.12_26286;NC_000006.12_15769;NC_000013.11_27627;hsa-miR-26a-1-3p;NC_000001.11_3101;NC_000002.12_3238;NC_000015.10_30316;…
PNPLA8	NONHSAT215932	0.453782	2.65095e-50	35	hsa-miR-33b-3p;hsa-miR-372-5p;NC_000013.11_28441;hsa-miR-30c-1-3p;hsa-miR-498;hsa-miR-7974;hsa-miR-518e-5p>hsa-miR-519a-5p>hsa-miR-519b-5p>hsa-miR-519c-5p>hsa-miR-522-5p>hsa-miR-523-5p;NC_000010.11_23646;NC_000021.9_35751;NC_000011.10_25384;hsa-miR-302c-5p;hsa-miR-17-5p;hsa-miR-34c-5p;NC_000013.11_27627;NC_000002.12_3238;NC_000003.12_9133;NC_000003.12_7973;NC_000011.10_25091;hsa-miR-519a-3p;hsa-m…
CTH	NR_038921	0.46	2.65095e-50	35	NC_000013.11_28441;hsa-miR-30c-1-3p;NC_000008.11_19445;hsa-miR-371b-3p;hsa-miR-7974;hsa-miR-518e-5p>hsa-miR-519a-5p>hsa-miR-519b-5p>hsa-miR-519c-5p>hsa-miR-522-5p>hsa-miR-523-5p;hsa-miR-3662;NC_000007.14_17821;hsa-miR-1298-5p;NC_000021.9_35751;NC_000011.10_25384;NC_000004.12_9892;hsa-miR-302c-5p;NC_000006.12_15769;hsa-miR-17-5p;NC_000013.11_27627;NC_000022.11_36372;hsa-miR-1257;NC_000003.12_7973;…
MXI1	ENST00000281092	0.26	2.68581e-50	36	hsa-miR-934;NC_000006.12_14671;hsa-miR-372-5p;hsa-miR-30c-1-3p;NC_000010.11_23303;hsa-miR-675-5p;hsa-miR-1298-5p;hsa-miR-27b-5p;NC_000012.12_25887;NC_000004.12_9892;NC_000005.10_11919>NC_000005.10_11920;NC_000006.12_15769;hsa-miR-17-5p;hsa-miR-34c-5p;NC_000022.11_36372;hsa-miR-1257;NC_000005.10_14158;NC_000001.11_3101;NC_000008.11_20037*;NC_000003.12_7973;hsa-miR-3529-3p;NC_000016.10_31157;NC_000…
PRDM1	ENST00000281092	0.295	2.68581e-50	36	hsa-miR-372-5p;hsa-miR-30c-1-3p;NC_000008.11_19445;hsa-miR-498;NC_000010.11_23303;hsa-miR-92a-1-5p;hsa-miR-629-3p;NC_000012.12_25887;NC_000021.9_35751;NC_000011.10_25384;NC_000004.12_9892;NC_000005.10_11919>NC_000005.10_11920;hsa-miR-302c-5p;NC_000006.12_15769;hsa-miR-34c-5p;NC_000022.11_36372;hsa-miR-1257;hsa-miR-26a-1-3p;hsa-miR-7-5p;NC_000003.12_7973;hsa-miR-15b-3p;hsa-miR-345-5p;hsa-miR-3529-…
NAB1	ENST00000281092	0.235	2.68581e-50	36	NC_000001.11_2008;hsa-miR-30c-1-3p;NC_000008.11_19445;hsa-miR-1298-5p;NC_000012.12_25887;NC_000021.9_35751;NC_000004.12_9892;hsa-miR-302c-5p;NC_000006.12_15769;hsa-miR-17-5p;hsa-miR-34c-5p;NC_000013.11_27627;hsa-miR-1257;hsa-miR-7-5p;NC_000002.12_3238;NC_000003.12_7973;NC_000011.10_25091;hsa-miR-3529-3p;NC_000016.10_31157;NC_000018.10_33037;hsa-miR-548d-3p;NC_000012.12_26721;hsa-miR-296-3p;NT_187…
CLIC4	ENST00000261530	0.214286	2.69008e-50	34	hsa-miR-934;hsa-miR-30c-1-3p;NC_000008.11_19445;hsa-miR-92a-1-5p;NC_000021.9_35751;NC_000011.10_25384;NC_000018.10_33742;NC_000004.12_9892;hsa-miR-302c-5p;hsa-miR-17-5p;NC_000013.11_27627;NC_000022.11_36437;hsa-miR-1257;hsa-miR-26a-1-3p;hsa-miR-7-5p;hsa-miR-519a-3p;hsa-miR-3529-3p;hsa-miR-515-5p;NC_000003.12_7520;hsa-miR-517a-3p>hsa-miR-517b-3p;hsa-miR-548d-3p;NT_187601.1_39493>NC_000014.9_29213;…
INHBA	NR_033268	0.46789	3.0693e-50	36	hsa-miR-934;hsa-miR-372-5p;NC_000013.11_28441;hsa-miR-30c-1-3p;hsa-miR-7974;hsa-miR-629-3p;NC_000003.12_7276;NC_000007.14_17821;NC_000021.9_35751;NC_000012.12_25887;hsa-miR-18a-3p;hsa-miR-302c-5p;NC_000012.12_26286;NC_000006.12_15769;hsa-miR-17-5p;NC_000022.11_36372;hsa-miR-26a-1-3p;hsa-miR-7-5p;NC_000001.11_3101;NC_000002.12_3238;NC_000011.10_25091;hsa-miR-345-5p;NC_000003.12_7520;NC_000012.12_2…
PRDM1	NONHSAT215932	0.378151	3.08037e-50	34	hsa-miR-372-5p;NC_000013.11_28441;hsa-miR-30c-1-3p;hsa-miR-498;NC_000023.11_36905;NC_000010.11_23303;hsa-miR-92a-1-5p;hsa-miR-518e-5p>hsa-miR-519a-5p>hsa-miR-519b-5p>hsa-miR-519c-5p>hsa-miR-522-5p>hsa-miR-523-5p;NC_000012.12_25887;NC_000021.9_35751;NC_000011.10_25384;NC_000005.10_11919>NC_000005.10_11920;hsa-miR-302c-5p;NC_000006.12_15769;hsa-miR-34c-5p;hsa-miR-1257;hsa-miR-26a-1-3p;NC_000003.12_…
ERN1	ENST00000281092	0.32	3.13745e-50	40	NC_000006.12_14671;hsa-miR-372-5p;hsa-miR-30c-1-3p;NC_000010.11_23303;hsa-miR-371b-3p;hsa-miR-675-5p;hsa-miR-92a-1-5p;hsa-miR-629-3p;hsa-miR-1298-5p;NC_000021.9_35751;NC_000012.12_25887;hsa-miR-18a-3p;NC_000011.10_25384;NC_000005.10_11919>NC_000005.10_11920;hsa-miR-302c-5p;NC_000012.12_26286;NC_000006.12_15769;hsa-miR-34c-5p;NC_000022.11_36372;NC_000005.10_14158;hsa-miR-26a-1-3p;NC_000001.11_3101…
SLC38A1	ENST00000237264	0.705882	3.18849e-50	37	hsa-miR-33b-3p;NC_000006.12_14671;NC_000013.11_28441;NC_000005.10_12140;NC_000008.11_19445;hsa-miR-92a-1-5p;hsa-miR-7974;hsa-miR-3662;hsa-miR-27b-5p;NC_000012.12_25887;NC_000011.10_25384;NC_000004.12_9892;hsa-miR-302c-5p;NC_000006.12_15769;hsa-miR-34c-5p;NC_000013.11_27627;NC_000022.11_36372;hsa-miR-26a-1-3p;hsa-miR-1257;hsa-miR-7-5p;NC_000001.11_3101;NC_000002.12_3238;NC_000003.12_7973;hsa-miR-5…
VTI1A	NONHSAT123764	0.676471	3.32633e-50	36	hsa-miR-934;NC_000006.12_14671;hsa-miR-372-5p;NC_000013.11_28441;hsa-miR-30c-1-3p;NC_000005.10_12140;hsa-miR-371b-3p;hsa-miR-7974;NC_000003.12_8583;NC_000021.9_35751;NC_000004.12_10500;NC_000011.10_25384;hsa-miR-302c-5p;hsa-miR-17-5p;NC_000022.11_36372;NC_000022.11_36437;hsa-miR-1257;NC_000002.12_3238;NC_000003.12_7973;NC_000018.10_33480;hsa-miR-519a-3p;NC_000015.10_30316;hsa-miR-15b-3p;hsa-miR-5…
RALGPS2	ENST00000568777	0.534091	3.51466e-50	37	hsa-miR-934;hsa-miR-33b-3p;hsa-miR-372-5p;NC_000013.11_28441;hsa-miR-30c-1-3p;hsa-miR-92a-1-5p;hsa-miR-518e-5p>hsa-miR-519a-5p>hsa-miR-519b-5p>hsa-miR-519c-5p>hsa-miR-522-5p>hsa-miR-523-5p;hsa-miR-629-3p;NC_000010.11_23646;NC_000012.12_25887;hsa-miR-18a-3p;NC_000004.12_9892;hsa-miR-302c-5p;NC_000006.12_15769;hsa-miR-34c-5p;hsa-miR-26a-1-3p;hsa-miR-7-5p;NC_000001.11_3101;NC_000002.12_3238;NC_00000…
TSC22D1	NR_033268	0.46789	3.56206e-50	38	hsa-miR-934;NC_000009.12_21574;hsa-miR-3155a;NC_000013.11_28441;NC_000009.12_20733;NC_000010.11_23303;hsa-miR-371b-3p;hsa-miR-92a-1-5p;hsa-miR-7974;NC_000007.14_17821;hsa-miR-510-5p;NC_000010.11_23646;NC_000021.9_35751;NC_000012.12_25887;hsa-miR-18a-3p;NC_000003.12_8583;NC_000004.12_9958;hsa-miR-302c-5p;NC_000006.12_15769;hsa-miR-7-5p;NC_000001.11_3101;hsa-miR-520a-3p;hsa-miR-512-3p;hsa-miR-302b-…
MTMR9	ENST00000432045	0.625	3.8518e-50	34	hsa-miR-25-5p;hsa-miR-372-5p;hsa-miR-30c-1-3p;hsa-miR-498;NC_000008.11_19445;NC_000003.12_7276;NC_000012.12_25887;NC_000011.10_25384;NC_000004.12_9892;NC_000009.12_21255;hsa-miR-17-5p;hsa-miR-34c-5p;NC_000022.11_36372;hsa-miR-26a-1-3p;hsa-miR-1257;hsa-miR-7-5p;NC_000008.11_20037*;NC_000011.10_25091;hsa-miR-515-5p;NC_000003.12_7520;hsa-miR-548d-3p;NC_000012.12_26721;hsa-miR-296-3p;NT_187601.1_3949…
MTMR9	NR_034072	0.666667	3.8518e-50	34	hsa-miR-1323;hsa-miR-25-5p;hsa-miR-372-5p;NC_000013.11_28441;hsa-miR-30c-1-3p;hsa-miR-7974;hsa-miR-3662;hsa-miR-510-5p;NC_000012.12_25887;NC_000004.12_10500;NC_000011.10_25384;hsa-miR-302c-5p;hsa-miR-17-5p;NC_000013.11_27627;hsa-miR-26a-1-3p;hsa-miR-7-5p;NC_000012.12_25503;NC_000011.10_25091;hsa-miR-512-3p;hsa-miR-3529-3p;hsa-miR-515-5p;NC_000003.12_7520;NC_000012.12_26414;hsa-miR-526b-5p;hsa-miR…
PPARA	ENST00000237264	0.541176	3.92012e-50	38	hsa-miR-33b-3p;NC_000006.12_14671;NC_000013.11_28441;NC_000005.10_12140;NC_000008.11_19445;hsa-miR-92a-1-5p;hsa-miR-7974;hsa-miR-518e-5p>hsa-miR-519a-5p>hsa-miR-519b-5p>hsa-miR-519c-5p>hsa-miR-522-5p>hsa-miR-523-5p;hsa-miR-3662;hsa-miR-510-5p;hsa-miR-1298-5p;NC_000021.9_35751;hsa-miR-27b-5p;hsa-miR-18a-3p;NC_000012.12_25887;NC_000011.10_25384;NC_000005.10_11919>NC_000005.10_11920;hsa-miR-302c-5p;…
PPARA	NR_038921	0.65	3.92012e-50	38	NC_000013.11_28441;hsa-miR-30c-1-3p;NC_000008.11_19445;hsa-miR-7974;hsa-miR-518e-5p>hsa-miR-519a-5p>hsa-miR-519b-5p>hsa-miR-519c-5p>hsa-miR-522-5p>hsa-miR-523-5p;hsa-miR-3662;hsa-miR-1298-5p;hsa-miR-27b-5p;NC_000021.9_35751;NC_000012.12_25887;NC_000011.10_25384;NC_000005.10_11919>NC_000005.10_11920;hsa-miR-302c-5p;NC_000012.12_26286;NC_000006.12_15769;hsa-miR-17-5p;NC_000013.11_27627;hsa-miR-1257…
ATP2B4	NR_038921	0.49	3.92012e-50	38	NC_000001.11_2008;hsa-miR-372-5p;NC_000013.11_28441;hsa-miR-30c-1-3p;hsa-miR-371b-3p;NC_000005.10_12588;hsa-miR-7974;hsa-miR-3662;NC_000007.14_17821;hsa-miR-27b-5p;NC_000021.9_35751;NC_000012.12_25887;NC_000011.10_25384;NC_000005.10_11919>NC_000005.10_11920;NC_000004.12_9892;NC_000009.12_21255;NC_000012.12_26286;NC_000006.12_15769;hsa-miR-17-5p;NC_000013.11_27627;hsa-miR-1257;hsa-miR-26a-1-3p;NC_…
MEF2A	NONHSAT215932	0.462185	3.92012e-50	38	hsa-miR-33b-3p;hsa-miR-372-5p;NC_000013.11_28441;hsa-miR-30c-1-3p;hsa-miR-498;NC_000023.11_36905;hsa-miR-92a-1-5p;hsa-miR-518e-5p>hsa-miR-519a-5p>hsa-miR-519b-5p>hsa-miR-519c-5p>hsa-miR-522-5p>hsa-miR-523-5p;NC_000007.14_17821;NC_000010.11_23646;NC_000021.9_35751;NC_000012.12_25887;NC_000011.10_25384;hsa-miR-302c-5p;NC_000006.12_15769;hsa-miR-17-5p;NC_000013.11_27627;hsa-miR-26a-1-3p;hsa-miR-1257…
SLC4A5	ENST00000261530	0.22449	4.04376e-50	33	hsa-miR-33b-3p;hsa-miR-30c-1-3p;NC_000008.11_19445;NC_000023.11_36905;hsa-miR-498;hsa-miR-629-3p;NC_000012.12_25887;hsa-miR-18a-3p;NC_000011.10_25384;NC_000005.10_11919>NC_000005.10_11920;hsa-miR-17-5p;hsa-miR-34c-5p;hsa-miR-7-5p;NC_000001.11_3101;NC_000003.12_7973;hsa-miR-519a-3p;hsa-miR-345-5p;hsa-miR-3529-3p;hsa-miR-515-5p;NC_000020.11_35116;NC_000018.10_33037;hsa-miR-548d-3p;NT_187601.1_39493…
BAHCC1	NR_033268	0.513761	4.05325e-50	37	hsa-miR-371a-5p;hsa-miR-372-5p;hsa-miR-3155a;hsa-miR-30c-1-3p;NC_000023.11_36905;hsa-miR-371b-3p;hsa-miR-92a-1-5p;hsa-miR-7974;hsa-miR-518e-5p>hsa-miR-519a-5p>hsa-miR-519b-5p>hsa-miR-519c-5p>hsa-miR-522-5p>hsa-miR-523-5p;hsa-miR-629-3p;NC_000007.14_17821;NC_000010.11_23646;NC_000021.9_35751;NC_000003.12_8583;hsa-miR-18a-3p;NC_000012.12_25887;NC_000012.12_26286;NC_000006.12_15769;hsa-miR-17-5p;NC_…
CHD9	XR_428151	0.696429	4.16041e-50	31	hsa-miR-934;NC_000006.12_14671;hsa-miR-30c-1-3p;hsa-miR-498;NC_000010.11_23303;NC_000007.14_17821;hsa-miR-18a-3p;NC_000011.10_25384;NC_000004.12_9892;NC_000006.12_15769;hsa-miR-17-5p;NC_000022.11_36372;hsa-miR-1257;NC_000002.12_3238;NC_000003.12_7973;NC_000011.10_25091;hsa-miR-519a-3p;NC_000015.10_30316;hsa-miR-3529-3p;hsa-miR-515-5p;hsa-miR-548d-3p;hsa-miR-296-3p;NT_187601.1_39493>NC_000014.9_29…
ANK2	NR_002775	0.842105	4.32992e-50	35	NC_000009.12_21574;hsa-miR-25-5p;hsa-miR-3155a;hsa-miR-30c-1-3p;NC_000008.11_19445;NC_000010.11_23303;hsa-miR-629-3p;hsa-miR-3662;hsa-miR-510-5p;NC_000007.14_17821;NC_000003.12_8583;hsa-miR-27b-5p;NC_000010.11_23646;NC_000011.10_25384;NC_000005.10_11919>NC_000005.10_11920;NC_000012.12_26286;hsa-miR-17-5p;hsa-miR-26a-1-3p;NC_000001.11_3101;NC_000003.12_7973;hsa-miR-520a-3p;NC_000012.12_25503;NC_00…
ADAM20	lnc-LY86-6:2	0.71875	4.47007e-50	34	hsa-miR-33b-3p;hsa-miR-372-5p;hsa-miR-371b-3p;NC_000010.11_23303;hsa-miR-92a-1-5p;hsa-miR-7974;hsa-miR-518e-5p>hsa-miR-519a-5p>hsa-miR-519b-5p>hsa-miR-519c-5p>hsa-miR-522-5p>hsa-miR-523-5p;NC_000003.12_7276;hsa-miR-3662;NC_000007.14_17821;hsa-miR-510-5p;NC_000003.12_8583;NC_000010.11_23646;NC_000011.10_25384;NC_000005.10_11919>NC_000005.10_11920;NC_000012.12_26286;NC_000006.12_15769;hsa-miR-34c-5…
CREBRF	lnc-POTED-16:1	0.68254	4.58239e-50	32	hsa-miR-1323;NC_000013.11_28441;NC_000008.11_19445;NC_000007.14_17821;hsa-miR-27b-5p;NC_000012.12_25887;NC_000011.10_25384;NC_000004.12_9892;NC_000006.12_15769;hsa-miR-17-5p;hsa-miR-1257;hsa-miR-7-5p;NC_000012.12_25503;NC_000011.10_25091;hsa-miR-519a-3p;hsa-miR-15b-3p;hsa-miR-3529-3p;hsa-miR-515-5p;NC_000020.11_35116;NC_000003.12_7520;NC_000018.10_33037;hsa-miR-548d-3p;hsa-miR-302b-3p;hsa-miR-20a…
PLEC	ENST00000261530	0.27551	4.82199e-50	37	hsa-miR-33b-3p;NC_000006.12_14671;hsa-miR-25-5p;hsa-miR-372-5p;hsa-miR-30c-1-3p;NC_000023.11_36905;NC_000010.11_23303;hsa-miR-371b-3p;hsa-miR-92a-1-5p;NC_000003.12_7276;NC_000010.11_23646;NC_000021.9_35751;hsa-miR-18a-3p;NC_000011.10_25384;NC_000005.10_11919>NC_000005.10_11920;hsa-miR-34c-5p;NC_000006.12_15809;NC_000013.11_27627;NC_000005.10_14158;hsa-miR-1257;hsa-miR-7-5p;NC_000002.12_3238;NC_00…
RBAK	ENST00000261530	0.321429	4.82199e-50	37	hsa-miR-934;NC_000006.12_14671;hsa-miR-372-5p;hsa-miR-30c-1-3p;NC_000010.11_23303;hsa-miR-371b-3p;hsa-miR-92a-1-5p;hsa-miR-629-3p;NC_000007.14_17821;NC_000010.11_23646;NC_000021.9_35751;hsa-miR-18a-3p;NC_000011.10_25384;NC_000006.12_15809;hsa-miR-1257;NC_000022.11_36437;hsa-miR-7-5p;NC_000001.11_3101;NC_000002.12_3238;NC_000003.12_7973;NC_000012.12_25503;hsa-miR-3529-3p;NC_000003.12_7520;NC_00001…
CTH	ENST00000281092	0.255	5.10475e-50	37	hsa-miR-30c-1-3p;NC_000008.11_19445;hsa-miR-371b-3p;NC_000010.11_23303;hsa-miR-92a-1-5p;hsa-miR-629-3p;hsa-miR-1298-5p;NC_000021.9_35751;hsa-miR-18a-3p;NC_000011.10_25384;NC_000004.12_9892;hsa-miR-302c-5p;NC_000006.12_15769;hsa-miR-17-5p;NC_000013.11_27627;NC_000022.11_36372;hsa-miR-1257;NC_000003.12_7973;hsa-miR-345-5p;hsa-miR-3529-3p;NC_000003.12_7520;hsa-miR-548d-3p;hsa-miR-296-3p;NT_187601.1_…
MTMR9	ENST00000568777	0.522727	5.49973e-50	36	NC_000001.11_2008;hsa-miR-33b-3p;hsa-miR-372-5p;NC_000013.11_28441;hsa-miR-30c-1-3p;NC_000005.10_12588;hsa-miR-675-5p;hsa-miR-518e-5p>hsa-miR-519a-5p>hsa-miR-519b-5p>hsa-miR-519c-5p>hsa-miR-522-5p>hsa-miR-523-5p;NC_000003.12_7276;NC_000010.11_23646;NC_000003.12_8583;NC_000012.12_25887;NC_000004.12_9892;hsa-miR-302c-5p;hsa-miR-34c-5p;hsa-miR-26a-1-3p;hsa-miR-7-5p;NC_000001.11_3101;NC_000012.12_255…
CREBRF	ENST00000568777	0.511364	5.52032e-50	35	NC_000001.11_2008;hsa-miR-934;NC_000013.11_28441;hsa-miR-30c-1-3p;NC_000005.10_12588;NC_000012.12_25887;hsa-miR-18a-3p;NC_000018.10_33742;NC_000004.12_9892;hsa-miR-302c-5p;NC_000006.12_15769;hsa-miR-34c-5p;hsa-miR-26a-1-3p;hsa-miR-7-5p;NC_000001.11_3101;NC_000002.12_3238;NC_000012.12_25503;NC_000011.10_25091;hsa-miR-515-5p;NC_000020.11_35116;NC_000003.12_7520;NC_000012.12_26414;hsa-miR-548d-3p;hs…
CREBRF	ENST00000563635	0.648649	5.52032e-50	35	hsa-miR-934;NC_000013.11_28441;hsa-miR-498;NC_000008.11_19445;NC_000005.10_12588;NC_000007.14_17821;NC_000012.12_25887;hsa-miR-18a-3p;NC_000011.10_25384;NC_000004.12_9892;hsa-miR-302c-5p;NC_000006.12_15769;hsa-miR-17-5p;NC_000022.11_36372;hsa-miR-26a-1-3p;NC_000001.11_3101;NC_000008.11_20037*;NC_000012.12_25503;hsa-miR-519a-3p;hsa-miR-3529-3p;hsa-miR-548d-3p;NC_000012.12_26721;hsa-miR-296-3p;hsa-…
PPARA	NONHSAT224112	0.64	5.91479e-50	37	hsa-miR-371a-5p;hsa-miR-3155a;NC_000013.11_28441;NC_000008.11_19445;NC_000010.11_23303;hsa-miR-92a-1-5p;hsa-miR-629-3p;hsa-miR-3662;NC_000003.12_8583;NC_000012.12_25887;hsa-miR-18a-3p;NC_000004.12_10500;NC_000006.12_15769;NC_000013.11_27627;hsa-miR-26a-1-3p;NC_000022.11_36437;hsa-miR-7-5p;NC_000003.12_9133;hsa-miR-520a-3p;NC_000023.11_38289;hsa-miR-512-3p;hsa-miR-345-5p;hsa-miR-5585-3p;NC_000020.…
LMO7	NONHSAT224112	0.6	5.91479e-50	37	hsa-miR-371a-5p;hsa-miR-3155a;NC_000013.11_28441;NC_000008.11_19445;hsa-miR-3662;NC_000007.14_17821;NC_000003.12_8583;NC_000012.12_25887;hsa-miR-18a-3p;NC_000004.12_10500;NC_000006.12_15769;NC_000013.11_27627;NC_000022.11_36372;hsa-miR-26a-1-3p;NC_000022.11_36437;hsa-miR-7-5p;NC_000003.12_9133;hsa-miR-520a-3p;hsa-miR-92a-3p;NC_000016.10_31157;NC_000018.10_33037;hsa-let-7c-5p;hsa-miR-1284;NC_00001…
SH2B3	NONHSAT224112	0.586667	6.59273e-50	36	hsa-miR-371a-5p;hsa-miR-3155a;NC_000010.11_23303;hsa-miR-92a-1-5p;hsa-miR-3662;NC_000003.12_8583;NC_000012.12_25887;hsa-miR-18a-3p;NC_000004.12_10500;NC_000006.12_15769;NC_000022.11_36372;hsa-miR-26a-1-3p;NC_000022.11_36437;hsa-miR-7-5p;NC_000003.12_9133;hsa-miR-520a-3p;NC_000023.11_38289;hsa-miR-512-3p;hsa-miR-345-5p;hsa-miR-5585-3p;hsa-miR-92a-3p;NC_000020.11_35116;NC_000009.12_21957;NC_000018.…
GFPT1	ENST00000237264	0.670588	7.89079e-50	38	NC_000001.11_2008;hsa-miR-33b-3p;NC_000005.10_12140;NC_000008.11_19445;hsa-miR-92a-1-5p;hsa-miR-3662;hsa-miR-1298-5p;hsa-miR-27b-5p;NC_000012.12_25887;hsa-miR-18a-3p;NC_000005.10_11919>NC_000005.10_11920;NC_000004.12_9892;hsa-miR-302c-5p;NC_000006.12_15769;hsa-miR-34c-5p;NC_000006.12_15809;NC_000013.11_27627;NC_000022.11_36372;NC_000022.11_36437;hsa-miR-7-5p;NC_000001.11_3101;NC_000003.12_7973;hs…
AHNAK2	NR_034072	0.650794	8.69152e-50	33	hsa-miR-934;hsa-miR-25-5p;hsa-miR-372-5p;hsa-miR-30c-1-3p;hsa-miR-371b-3p;hsa-miR-7974;hsa-miR-3662;hsa-miR-510-5p;hsa-miR-302a-5p;NC_000012.12_25887;NC_000004.12_10500;NC_000011.10_25384;hsa-miR-302c-5p;NC_000006.12_15769;NC_000006.12_15809;NC_000013.11_27627;hsa-miR-7-5p;NC_000002.12_3238;NC_000012.12_25503;NC_000011.10_25091;hsa-miR-512-3p;hsa-miR-345-5p;NC_000003.12_7520;NC_000012.12_26414;hs…
NCOA3	ENST00000237264	0.517647	8.71242e-50	36	hsa-miR-33b-3p;NC_000006.12_14671;NC_000013.11_28441;NC_000005.10_12140;NC_000008.11_19445;NC_000005.10_12588;hsa-miR-675-5p;hsa-miR-92a-1-5p;hsa-miR-7974;hsa-miR-3662;NC_000012.12_25887;hsa-miR-18a-3p;NC_000011.10_25384;NC_000004.12_9892;hsa-miR-302c-5p;NC_000006.12_15769;NC_000022.11_36372;NC_000022.11_36437;hsa-miR-26a-1-3p;NC_000001.11_3101;NC_000002.12_3238;NC_000003.12_7973;hsa-miR-519a-3p;…
ABLIM3	NR_033268	0.357798	9.4589e-50	36	hsa-miR-934;NC_000009.12_21574;hsa-miR-372-5p;NC_000013.11_28441;NC_000009.12_20733;hsa-miR-30c-1-3p;NC_000023.11_36905;NC_000010.11_23303;hsa-miR-92a-1-5p;hsa-miR-7974;NC_000003.12_7276;hsa-miR-629-3p;hsa-miR-302c-5p;NC_000012.12_26286;hsa-miR-17-5p;NC_000022.11_36372;hsa-miR-26a-1-3p;NC_000002.12_3238;hsa-miR-520a-3p;NC_000011.10_25091;hsa-miR-302b-5p;NC_000003.12_7520;NC_000009.12_21957;NC_000…
UPP1	NR_033268	0.394495	9.4589e-50	36	hsa-miR-371a-5p;hsa-miR-372-5p;hsa-miR-3155a;NC_000009.12_20733;hsa-miR-30c-1-3p;NC_000023.11_36905;NC_000010.11_23303;hsa-miR-371b-3p;hsa-miR-92a-1-5p;hsa-miR-7974;hsa-miR-518e-5p>hsa-miR-519a-5p>hsa-miR-519b-5p>hsa-miR-519c-5p>hsa-miR-522-5p>hsa-miR-523-5p;hsa-miR-629-3p;hsa-miR-510-5p;hsa-miR-302a-5p;NC_000003.12_8583;NC_000012.12_25887;hsa-miR-18a-3p;NC_000004.12_9958;hsa-miR-17-5p;NC_000005.…
HIPK2	NONHSAT205276	0.728814	1.02462e-49	35	hsa-miR-372-5p;NC_000013.11_28441;NC_000023.11_36905;hsa-miR-92a-1-5p;hsa-miR-7974;hsa-miR-518e-5p>hsa-miR-519a-5p>hsa-miR-519b-5p>hsa-miR-519c-5p>hsa-miR-522-5p>hsa-miR-523-5p;NC_000003.12_7276;hsa-miR-3662;hsa-miR-510-5p;NC_000007.14_17821;NC_000021.9_35751;hsa-miR-302a-5p;NC_000011.10_25384;NC_000012.12_26286;NC_000006.12_15769;hsa-miR-34c-5p;NC_000013.11_27627;NC_000005.10_14158;NC_000002.12_…
ZNF704	NONHSAT219565	0.735849	1.05527e-49	35	hsa-miR-934;NC_000006.12_14671;NC_000013.11_28441;NC_000023.11_36905;hsa-miR-3662;hsa-miR-510-5p;hsa-miR-27b-5p;NC_000003.12_8583;hsa-miR-302a-5p;NC_000011.10_25384;hsa-miR-17-5p;hsa-miR-34c-5p;NC_000022.11_36372;NC_000002.12_3238;NC_000003.12_9133;NC_000003.12_7973;NC_000012.12_25503;NC_000011.10_25091;NC_000015.10_30316;hsa-miR-15b-3p;hsa-miR-302b-5p;NC_000003.12_7520;NC_000016.10_31157;hsa-let…
CHD2	NONHSAT215932	0.386555	1.13719e-49	32	hsa-miR-934;hsa-miR-33b-3p;hsa-miR-372-5p;hsa-miR-498;NC_000023.11_36905;NC_000010.11_23303;hsa-miR-92a-1-5p;hsa-miR-7974;hsa-miR-518e-5p>hsa-miR-519a-5p>hsa-miR-519b-5p>hsa-miR-519c-5p>hsa-miR-522-5p>hsa-miR-523-5p;NC_000012.12_25887;NC_000011.10_25384;hsa-miR-302c-5p;NC_000006.12_15769;hsa-miR-17-5p;NC_000013.11_27627;hsa-miR-1257;NC_000008.11_20037*;NC_000002.12_3238;NC_000011.10_25091;hsa-miR…
PLEKHM1	ENST00000281092	0.225	1.14743e-49	35	hsa-miR-33b-3p;NC_000006.12_14671;hsa-miR-30c-1-3p;NC_000010.11_23303;hsa-miR-675-5p;hsa-miR-629-3p;hsa-miR-27b-5p;NC_000012.12_25887;hsa-miR-18a-3p;NC_000011.10_25384;NC_000012.12_26286;NC_000006.12_15769;hsa-miR-17-5p;hsa-miR-34c-5p;hsa-miR-26a-1-3p;hsa-miR-7-5p;NC_000001.11_3101;NC_000002.12_3238;NC_000003.12_7973;NC_000012.12_25503;hsa-miR-345-5p;hsa-miR-3529-3p;NC_000020.11_35116;NC_000003.1…
MXD1	ENST00000281092	0.31	1.20868e-49	39	hsa-miR-33b-3p;hsa-miR-30c-1-3p;hsa-miR-371b-3p;NC_000010.11_23303;hsa-miR-92a-1-5p;hsa-miR-629-3p;NC_000012.12_25887;NC_000011.10_25384;NC_000005.10_11919>NC_000005.10_11920;hsa-miR-302c-5p;NC_000006.12_15769;hsa-miR-17-5p;NC_000006.12_15809;NC_000022.11_36372;hsa-miR-26a-1-3p;hsa-miR-1257;NC_000001.11_3101;NC_000002.12_3238;NC_000003.12_7973;NC_000012.12_25503;NC_000011.10_25091;hsa-miR-15b-3p;…
ADAM20	ENST00000568777	0.681818	1.24504e-49	37	hsa-miR-934;hsa-miR-33b-3p;hsa-miR-372-5p;NC_000013.11_28441;hsa-miR-30c-1-3p;hsa-miR-371b-3p;hsa-miR-92a-1-5p;hsa-miR-518e-5p>hsa-miR-519a-5p>hsa-miR-519b-5p>hsa-miR-519c-5p>hsa-miR-522-5p>hsa-miR-523-5p;NC_000003.12_7276;NC_000010.11_23646;NC_000003.12_8583;NC_000012.12_25887;hsa-miR-18a-3p;hsa-miR-302c-5p;NC_000006.12_15769;hsa-miR-34c-5p;hsa-miR-26a-1-3p;hsa-miR-7-5p;NC_000001.11_3101;NC_0000…
MAP2	ENST00000568777	0.568182	1.24504e-49	37	hsa-miR-33b-3p;hsa-miR-372-5p;NC_000013.11_28441;hsa-miR-30c-1-3p;hsa-miR-371b-3p;hsa-miR-518e-5p>hsa-miR-519a-5p>hsa-miR-519b-5p>hsa-miR-519c-5p>hsa-miR-522-5p>hsa-miR-523-5p;NC_000003.12_7276;hsa-miR-629-3p;NC_000010.11_23646;NC_000003.12_8583;NC_000012.12_25887;hsa-miR-302c-5p;NC_000006.12_15769;hsa-miR-34c-5p;hsa-miR-26a-1-3p;hsa-miR-7-5p;NC_000001.11_3101;NC_000002.12_3238;NC_000003.12_7973;…
NR5A2	ENST00000263967	0.356164	1.38095e-49	34	hsa-miR-372-5p;NC_000013.11_28441;hsa-miR-7974;hsa-miR-629-3p;hsa-miR-3662;NC_000007.14_17821;NC_000012.12_25887;NC_000004.12_10500;NC_000011.10_25384;NC_000018.10_33742;NC_000005.10_11919>NC_000005.10_11920;NC_000004.12_9892;NC_000009.12_21255;hsa-miR-302c-5p;NC_000006.12_15769;hsa-miR-1257;NC_000002.12_3238;hsa-miR-345-5p;NC_000020.11_35116;NC_000012.12_26414;NC_000018.10_33037;NC_000012.12_267…
MLLT4	ENST00000263967	0.287671	1.38095e-49	34	hsa-miR-934;hsa-miR-33b-3p;hsa-miR-372-5p;NC_000013.11_28441;hsa-miR-30c-1-3p;hsa-miR-498;hsa-miR-92a-1-5p;hsa-miR-7974;hsa-miR-629-3p;NC_000007.14_17821;NC_000012.12_25887;NC_000011.10_25384;NC_000018.10_33742;NC_000006.12_15769;NC_000013.11_27627;hsa-miR-26a-1-3p;hsa-miR-7-5p;NC_000002.12_3238;NC_000011.10_25091;hsa-miR-15b-3p;NC_000003.12_7520;NC_000016.10_31157;NC_000012.12_26414;NC_000012.12…
CHD2	ENST00000261530	0.25	1.39183e-49	34	hsa-miR-934;hsa-miR-33b-3p;hsa-miR-25-5p;hsa-miR-372-5p;hsa-miR-498;NC_000023.11_36905;NC_000010.11_23303;hsa-miR-371b-3p;hsa-miR-92a-1-5p;hsa-miR-1298-5p;NC_000012.12_25887;NC_000011.10_25384;hsa-miR-302c-5p;hsa-miR-17-5p;NC_000013.11_27627;hsa-miR-1257;hsa-miR-7-5p;NC_000001.11_3101;NC_000002.12_3238;hsa-miR-519a-3p;hsa-miR-345-5p;hsa-miR-3529-3p;NC_000003.12_7520;NC_000012.12_26414;NT_187601.1…
SERINC1	ENST00000261530	0.22449	1.39183e-49	34	NC_000013.11_28441;hsa-miR-30c-1-3p;hsa-miR-371b-3p;NC_000010.11_23303;hsa-miR-92a-1-5p;hsa-miR-629-3p;NC_000012.12_25887;hsa-miR-18a-3p;NC_000011.10_25384;NC_000018.10_33742;NC_000005.10_11919>NC_000005.10_11920;NC_000004.12_9892;hsa-miR-17-5p;hsa-miR-34c-5p;NC_000006.12_15809;hsa-miR-26a-1-3p;NC_000001.11_3101;NC_000002.12_3238;NC_000003.12_7973;hsa-miR-519a-3p;hsa-miR-3529-3p;hsa-miR-515-5p;NC…
HIPK2	ENST00000432045	0.8125	1.3993e-49	36	NC_000006.12_14671;hsa-miR-372-5p;hsa-miR-30c-1-3p;NC_000008.11_19445;hsa-miR-498;NC_000003.12_7276;NC_000012.12_25887;hsa-miR-18a-3p;NC_000011.10_25384;NC_000004.12_9892;NC_000009.12_21255;NC_000006.12_15769;hsa-miR-17-5p;hsa-miR-34c-5p;NC_000022.11_36372;hsa-miR-26a-1-3p;hsa-miR-7-5p;NC_000011.10_25091;hsa-miR-515-5p;NC_000003.12_7520;NC_000020.11_35116;hsa-miR-548d-3p;NC_000012.12_26721;hsa-mi…
GABBR1	ENST00000261530	0.244898	1.51111e-49	37	hsa-miR-33b-3p;hsa-miR-25-5p;NC_000013.11_28441;hsa-miR-30c-1-3p;NC_000023.11_36905;NC_000010.11_23303;hsa-miR-371b-3p;hsa-miR-92a-1-5p;hsa-miR-629-3p;hsa-miR-1298-5p;NC_000010.11_23646;NC_000012.12_25887;hsa-miR-18a-3p;NC_000018.10_33742;NC_000005.10_11919>NC_000005.10_11920;hsa-miR-17-5p;hsa-miR-34c-5p;NC_000006.12_15809;NC_000022.11_36437;hsa-miR-1257;NC_000005.10_14158;hsa-miR-7-5p;NC_000002.…
SWT1	ENST00000261530	0.244898	1.51111e-49	37	NC_000006.12_14671;NC_000013.11_28441;hsa-miR-498;NC_000008.11_19445;hsa-miR-371b-3p;hsa-miR-92a-1-5p;NC_000003.12_7276;NC_000010.11_23646;NC_000012.12_25887;NC_000011.10_25384;NC_000018.10_33742;NC_000004.12_9892;NC_000005.10_11919>NC_000005.10_11920;hsa-miR-302c-5p;hsa-miR-17-5p;NC_000013.11_27627;hsa-miR-1257;hsa-miR-7-5p;NC_000002.12_3238;NC_000003.12_7973;NC_000012.12_25503;hsa-miR-3529-3p;N…
SLC45A4	NR_003587	0.606383	1.5656e-49	33	NC_000009.12_21574;hsa-miR-371a-5p;hsa-miR-3155a;NC_000005.10_12140;NC_000023.11_36905;hsa-miR-371b-3p;hsa-miR-92a-1-5p;hsa-miR-7974;NC_000007.14_17821;hsa-miR-510-5p;hsa-miR-1298-5p;NC_000003.12_8583;NC_000004.12_9958;NC_000004.12_10500;NC_000005.10_11919>NC_000005.10_11920;NC_000006.12_15769;NC_000005.10_14158;hsa-miR-7-5p;NC_000002.12_3238;NC_000015.10_30316;hsa-miR-15b-3p;hsa-miR-512-3p;hsa-m…
LCOR	NONHSAT215070	0.826923	1.57156e-49	30	hsa-miR-372-5p;hsa-miR-30c-1-3p;NC_000008.11_19445;hsa-miR-518e-5p>hsa-miR-519a-5p>hsa-miR-519b-5p>hsa-miR-519c-5p>hsa-miR-522-5p>hsa-miR-523-5p;NC_000007.14_17821;NC_000012.12_25887;NC_000011.10_25384;NC_000018.10_33742;NC_000004.12_9892;NC_000006.12_15769;hsa-miR-17-5p;hsa-miR-34c-5p;NC_000022.11_36372;hsa-miR-1257;hsa-miR-26a-1-3p;hsa-miR-7-5p;NC_000008.11_20037*;NC_000003.12_7973;hsa-miR-519a…
SLC7A11	ENST00000281092	0.445	1.58068e-49	40	hsa-miR-934;hsa-miR-372-5p;hsa-miR-30c-1-3p;NC_000008.11_19445;hsa-miR-27b-5p;NC_000021.9_35751;NC_000012.12_25887;NC_000011.10_25384;hsa-miR-302c-5p;NC_000012.12_26286;NC_000006.12_15769;hsa-miR-17-5p;NC_000006.12_15809;NC_000022.11_36372;hsa-miR-1257;hsa-miR-26a-1-3p;hsa-miR-7-5p;NC_000001.11_3101;NC_000002.12_3238;NC_000003.12_7973;NC_000012.12_25503;hsa-miR-15b-3p;hsa-miR-345-5p;hsa-miR-3529-…
C1orf116	ENST00000281092	0.27	1.58182e-49	38	hsa-miR-934;NC_000006.12_14671;hsa-miR-372-5p;hsa-miR-30c-1-3p;NC_000008.11_19445;hsa-miR-498;NC_000010.11_23303;hsa-miR-675-5p;hsa-miR-92a-1-5p;NC_000021.9_35751;NC_000011.10_25384;NC_000005.10_11919>NC_000005.10_11920;hsa-miR-34c-5p;hsa-miR-26a-1-3p;NC_000005.10_14158;NC_000001.11_3101;NC_000002.12_3238;NC_000012.12_25503;NC_000011.10_25091;hsa-miR-345-5p;hsa-miR-515-5p;NC_000003.12_7520;NC_000…
ERRFI1	NONHSAT215932	0.411765	1.80216e-49	35	hsa-miR-372-5p;hsa-miR-30c-1-3p;hsa-miR-498;hsa-miR-7974;hsa-miR-518e-5p>hsa-miR-519a-5p>hsa-miR-519b-5p>hsa-miR-519c-5p>hsa-miR-522-5p>hsa-miR-523-5p;NC_000007.14_17821;NC_000021.9_35751;NC_000012.12_25887;NC_000011.10_25384;NC_000006.12_15769;hsa-miR-17-5p;NC_000013.11_27627;NC_000005.10_14158;hsa-miR-26a-1-3p;NC_000002.12_3238;NC_000003.12_9133;NC_000003.12_7973;NC_000011.10_25091;hsa-miR-519a…
ERRFI1	NR_038921	0.48	1.80216e-49	35	hsa-miR-372-5p;hsa-miR-30c-1-3p;NC_000008.11_19445;hsa-miR-7974;hsa-miR-518e-5p>hsa-miR-519a-5p>hsa-miR-519b-5p>hsa-miR-519c-5p>hsa-miR-522-5p>hsa-miR-523-5p;hsa-miR-3662;NC_000007.14_17821;hsa-miR-1298-5p;NC_000021.9_35751;NC_000012.12_25887;NC_000011.10_25384;NC_000006.12_15769;hsa-miR-17-5p;NC_000006.12_15809;NC_000013.11_27627;NC_000022.11_36372;hsa-miR-26a-1-3p;NC_000001.11_3101;NC_000002.12…
PNPLA8	NONHSAT219565	0.679245	1.89573e-49	32	NC_000006.12_14671;NC_000013.11_28441;hsa-miR-498;hsa-miR-3662;hsa-miR-27b-5p;NC_000003.12_8583;NC_000011.10_25384;hsa-miR-17-5p;hsa-miR-34c-5p;NC_000022.11_36372;NC_000002.12_3238;NC_000003.12_9133;NC_000003.12_7973;NC_000018.10_33480;NC_000011.10_25091;hsa-miR-519a-3p;hsa-miR-15b-3p;hsa-miR-302b-5p;NC_000003.12_7520;NC_000016.10_31157;hsa-let-7c-5p;NC_000018.10_33504*;NT_187601.1_39493>NC_00001…
PIK3CA	NONHSAT165427	0.641791	1.97348e-49	35	hsa-miR-934;NC_000007.14_18366;hsa-miR-372-5p;NC_000013.11_28441;hsa-miR-3155a;NC_000005.10_12140;hsa-miR-371b-3p;hsa-miR-7974;hsa-miR-518e-5p>hsa-miR-519a-5p>hsa-miR-519b-5p>hsa-miR-519c-5p>hsa-miR-522-5p>hsa-miR-523-5p;hsa-miR-3662;hsa-miR-302a-5p;NC_000010.11_23646;NC_000012.12_25887;NC_000004.12_9958;NC_000011.10_25384;NC_000006.12_15769;NC_000022.11_36437;hsa-miR-26a-1-3p;NC_000002.12_3238;N…
GNE	NR_033268	0.458716	2.16211e-49	38	hsa-miR-934;hsa-miR-3155a;NC_000013.11_28441;hsa-miR-30c-1-3p;NC_000010.11_23303;hsa-miR-92a-1-5p;hsa-miR-629-3p;NC_000007.14_17821;hsa-miR-510-5p;hsa-miR-1298-5p;NC_000003.12_8583;NC_000010.11_23646;NC_000012.12_25887;hsa-miR-302c-5p;NC_000006.12_15769;hsa-miR-17-5p;NC_000022.11_36372;NC_000005.10_14158;NC_000001.11_3101;NC_000002.12_3238;NC_000003.12_9133;hsa-miR-520a-3p;NC_000011.10_25091;hsa-…
PDLIM5	ENST00000261530	0.306122	2.17862e-49	38	NC_000006.12_14671;hsa-miR-372-5p;NC_000008.11_19445;hsa-miR-92a-1-5p;hsa-miR-629-3p;NC_000007.14_17821;hsa-miR-27b-5p;NC_000010.11_23646;NC_000021.9_35751;NC_000012.12_25887;NC_000011.10_25384;hsa-miR-302c-5p;hsa-miR-17-5p;hsa-miR-34c-5p;NC_000013.11_27627;hsa-miR-26a-1-3p;hsa-miR-1257;NC_000005.10_14158;NC_000001.11_3101;NC_000002.12_3238;hsa-miR-519a-3p;NC_000015.10_30316;hsa-miR-3529-3p;NC_00…
MAP3K5	ENST00000261530	0.219388	2.20725e-49	36	hsa-miR-33b-3p;NC_000006.12_14671;hsa-miR-25-5p;NC_000013.11_28441;NC_000010.11_23303;hsa-miR-92a-1-5p;hsa-miR-629-3p;NC_000011.10_25384;NC_000018.10_33742;NC_000005.10_11919>NC_000005.10_11920;hsa-miR-17-5p;hsa-miR-34c-5p;NC_000013.11_27627;NC_000022.11_36437;hsa-miR-1257;NC_000005.10_14158;hsa-miR-7-5p;NC_000002.12_3238;NC_000003.12_7973;NC_000012.12_25503;NC_000015.10_30316;hsa-miR-515-5p;NC_0…
PRDM1	ENST00000261530	0.234694	2.20725e-49	36	hsa-miR-372-5p;NC_000013.11_28441;hsa-miR-30c-1-3p;NC_000008.11_19445;NC_000023.11_36905;NC_000010.11_23303;hsa-miR-498;hsa-miR-92a-1-5p;hsa-miR-629-3p;NC_000012.12_25887;NC_000021.9_35751;NC_000011.10_25384;NC_000018.10_33742;NC_000004.12_9892;NC_000005.10_11919>NC_000005.10_11920;hsa-miR-302c-5p;hsa-miR-34c-5p;hsa-miR-1257;hsa-miR-26a-1-3p;hsa-miR-7-5p;NC_000003.12_7973;NC_000015.10_30316;hsa-m…
OSTM1	ENST00000261530	0.326531	2.2494e-49	35	NC_000013.11_28441;NC_000008.11_19445;NC_000005.10_12588;hsa-miR-92a-1-5p;hsa-miR-629-3p;NC_000003.12_7276;NC_000007.14_17821;NC_000010.11_23646;NC_000012.12_25887;NC_000011.10_25384;NC_000004.12_9892;hsa-miR-17-5p;NC_000013.11_27627;hsa-miR-7-5p;NC_000001.11_3101;NC_000002.12_3238;hsa-miR-519a-3p;NC_000015.10_30316;hsa-miR-345-5p;hsa-miR-3529-3p;hsa-miR-515-5p;NC_000012.12_26414;NC_000018.10_330…
KCNMA1	ENST00000281092	0.335	2.2519e-49	33	hsa-miR-33b-3p;hsa-miR-372-5p;hsa-miR-30c-1-3p;NC_000008.11_19445;hsa-miR-498;hsa-miR-1298-5p;NC_000012.12_25887;NC_000011.10_25384;NC_000005.10_11919>NC_000005.10_11920;NC_000006.12_15769;hsa-miR-34c-5p;NC_000006.12_15809;NC_000022.11_36372;hsa-miR-26a-1-3p;hsa-miR-1257;NC_000011.10_25091;hsa-miR-345-5p;hsa-miR-3529-3p;hsa-miR-515-5p;NC_000016.10_31157;hsa-miR-548d-3p;hsa-miR-296-3p;hsa-miR-302b…
VTI1A	ENST00000432045	0.7875	2.27774e-49	36	NC_000006.12_14671;hsa-miR-25-5p;hsa-miR-372-5p;hsa-miR-30c-1-3p;hsa-miR-498;NC_000008.11_19445;hsa-miR-629-3p;NC_000012.12_25887;hsa-miR-18a-3p;NC_000011.10_25384;NC_000004.12_9892;NC_000006.12_15769;hsa-miR-17-5p;hsa-miR-34c-5p;NC_000022.11_36372;hsa-miR-26a-1-3p;hsa-miR-1257;hsa-miR-7-5p;NC_000003.12_7520;NC_000020.11_35116;NC_000012.12_26721;hsa-miR-296-3p;NT_187601.1_39493>NC_000014.9_29213;…
RGS3	NONHSAT170697	0.849057	2.35262e-49	28	NC_000024.10_38844;NC_000010.11_22861;hsa-miR-26b-5p;NC_000002.12_3880;NC_000003.12_9115;hsa-miR-9-5p;hsa-miR-155-5p;NC_000011.10_23882;NC_000001.11_2749*;hsa-miR-193a-5p;NC_000008.11_18787;NC_000010.11_22289;hsa-miR-181c-5p;hsa-miR-30d-5p;NC_000011.10_24785;NC_000017.11_32431;hsa-miR-328-3p;hsa-miR-361-3p;hsa-miR-449c-5p;NC_000020.11_34751;NC_000014.9_29046;hsa-miR-181a-5p;hsa-miR-22-3p;hsa-miR-…
FRAS1	lnc-LY86-6:2	0.703125	2.52296e-49	32	hsa-miR-25-5p;hsa-miR-372-5p;hsa-miR-371b-3p;NC_000010.11_23303;hsa-miR-92a-1-5p;hsa-miR-7974;NC_000003.12_7276;hsa-miR-3662;hsa-miR-510-5p;NC_000007.14_17821;hsa-miR-27b-5p;NC_000010.11_23646;NC_000003.12_8583;NC_000011.10_25384;NC_000005.10_11919>NC_000005.10_11920;NC_000012.12_26286;hsa-miR-34c-5p;hsa-miR-1257;hsa-miR-7-5p;NC_000002.12_3238;hsa-miR-520a-3p;NC_000012.12_26414;hsa-let-7c-5p;hsa-…
TMEM181	ENST00000263967	0.315068	2.53813e-49	33	hsa-miR-372-5p;hsa-miR-30c-1-3p;hsa-miR-92a-1-5p;hsa-miR-629-3p;NC_000007.14_17821;NC_000012.12_25887;NC_000004.12_9892;NC_000009.12_21255;hsa-miR-302c-5p;NC_000006.12_15769;hsa-miR-17-5p;NC_000013.11_27627;hsa-miR-1257;hsa-miR-7-5p;NC_000002.12_3238;hsa-miR-519a-3p;hsa-miR-15b-3p;hsa-miR-345-5p;NC_000020.11_35116;NC_000018.10_33037;hsa-miR-296-3p;hsa-miR-302b-3p;hsa-miR-20a-5p;hsa-miR-3143;hsa-m…
DENND4A	ENST00000568777	0.568182	2.60921e-49	35	NC_000001.11_2008;hsa-miR-934;NC_000013.11_28441;hsa-miR-30c-1-3p;hsa-miR-371b-3p;NC_000005.10_12588;hsa-miR-518e-5p>hsa-miR-519a-5p>hsa-miR-519b-5p>hsa-miR-519c-5p>hsa-miR-522-5p>hsa-miR-523-5p;hsa-miR-629-3p;NC_000010.11_23646;NC_000012.12_25887;NC_000004.12_9892;NC_000006.12_15769;hsa-miR-34c-5p;hsa-miR-26a-1-3p;hsa-miR-7-5p;NC_000001.11_3101;NC_000002.12_3238;NC_000003.12_7973;NC_000012.12_25…
INHBA	NR_038921	0.51	2.62489e-49	34	hsa-miR-372-5p;NC_000013.11_28441;hsa-miR-30c-1-3p;NC_000008.11_19445;hsa-miR-7974;NC_000007.14_17821;hsa-miR-27b-5p;NC_000021.9_35751;NC_000012.12_25887;NC_000004.12_9892;hsa-miR-302c-5p;NC_000012.12_26286;NC_000006.12_15769;hsa-miR-17-5p;NC_000013.11_27627;NC_000022.11_36372;hsa-miR-1257;hsa-miR-26a-1-3p;NC_000001.11_3101;NC_000002.12_3238;NC_000016.10_31157;NC_000018.10_33037;hsa-miR-526b-5p;N…
NMNAT1	NR_033268	0.422018	2.93561e-49	37	hsa-miR-371a-5p;hsa-miR-372-5p;hsa-miR-30c-1-3p;hsa-miR-92a-1-5p;hsa-miR-518e-5p>hsa-miR-519a-5p>hsa-miR-519b-5p>hsa-miR-519c-5p>hsa-miR-522-5p>hsa-miR-523-5p;hsa-miR-1298-5p;hsa-miR-510-5p;hsa-miR-302a-5p;NC_000021.9_35751;NC_000003.12_8583;NC_000010.11_23646;NC_000012.12_25887;hsa-miR-302c-5p;NC_000006.12_15769;hsa-miR-17-5p;NC_000022.11_36372;hsa-miR-7-5p;NC_000002.12_3238;hsa-miR-520a-3p;NC_0…
RNF14	NR_033268	0.431193	2.93561e-49	37	hsa-miR-934;hsa-miR-372-5p;NC_000013.11_28441;NC_000023.11_36905;hsa-miR-371b-3p;hsa-miR-92a-1-5p;hsa-miR-518e-5p>hsa-miR-519a-5p>hsa-miR-519b-5p>hsa-miR-519c-5p>hsa-miR-522-5p>hsa-miR-523-5p;NC_000003.12_7276;hsa-miR-510-5p;NC_000010.11_23646;NC_000003.12_8583;NC_000012.12_25887;hsa-miR-302c-5p;NC_000012.12_26286;NC_000006.12_15769;hsa-miR-17-5p;hsa-miR-26a-1-3p;NC_000005.10_14158;hsa-miR-7-5p;N…
PDLIM5	NR_033268	0.458716	2.93561e-49	37	hsa-miR-371a-5p;hsa-miR-372-5p;hsa-miR-3155a;hsa-miR-92a-1-5p;hsa-miR-7974;hsa-miR-518e-5p>hsa-miR-519a-5p>hsa-miR-519b-5p>hsa-miR-519c-5p>hsa-miR-522-5p>hsa-miR-523-5p;hsa-miR-629-3p;NC_000007.14_17821;hsa-miR-302a-5p;NC_000010.11_23646;NC_000021.9_35751;NC_000003.12_8583;NC_000012.12_25887;hsa-miR-302c-5p;NC_000012.12_26286;NC_000006.12_15769;hsa-miR-17-5p;NC_000022.11_36372;NC_000005.10_14158;…
ERN1	NONHSAT215932	0.403361	3.12911e-49	37	hsa-miR-372-5p;hsa-miR-30c-1-3p;NC_000010.11_23303;hsa-miR-92a-1-5p;hsa-miR-518e-5p>hsa-miR-519a-5p>hsa-miR-519b-5p>hsa-miR-519c-5p>hsa-miR-522-5p>hsa-miR-523-5p;NC_000007.14_17821;NC_000010.11_23646;NC_000021.9_35751;NC_000012.12_25887;NC_000011.10_25384;NC_000005.10_11919>NC_000005.10_11920;hsa-miR-302c-5p;NC_000012.12_26286;NC_000006.12_15769;hsa-miR-34c-5p;hsa-miR-26a-1-3p;NC_000005.10_14158;…
NCOA7	NR_038921	0.58	3.12911e-49	37	NC_000001.11_2008;hsa-miR-372-5p;NC_000013.11_28441;hsa-miR-30c-1-3p;NC_000008.11_19445;hsa-miR-371b-3p;hsa-miR-518e-5p>hsa-miR-519a-5p>hsa-miR-519b-5p>hsa-miR-519c-5p>hsa-miR-522-5p>hsa-miR-523-5p;hsa-miR-3662;hsa-miR-27b-5p;NC_000012.12_25887;NC_000011.10_25384;NC_000004.12_9892;hsa-miR-302c-5p;NC_000012.12_26286;NC_000006.12_15769;hsa-miR-17-5p;NC_000013.11_27627;NC_000022.11_36372;hsa-miR-26a…
NCOA7	ENST00000237264	0.564706	3.12911e-49	37	NC_000001.11_2008;NC_000006.12_14671;NC_000013.11_28441;NC_000005.10_12140;NC_000008.11_19445;hsa-miR-92a-1-5p;hsa-miR-518e-5p>hsa-miR-519a-5p>hsa-miR-519b-5p>hsa-miR-519c-5p>hsa-miR-522-5p>hsa-miR-523-5p;hsa-miR-3662;hsa-miR-510-5p;hsa-miR-27b-5p;NC_000012.12_25887;hsa-miR-18a-3p;NC_000011.10_25384;NC_000004.12_9892;hsa-miR-302c-5p;NC_000006.12_15769;NC_000013.11_27627;NC_000022.11_36372;NC_0000…
GALNT5	NR_034072	0.777778	3.33895e-49	35	hsa-miR-25-5p;hsa-miR-372-5p;NC_000013.11_28441;hsa-miR-30c-1-3p;hsa-miR-371b-3p;hsa-miR-3662;hsa-miR-510-5p;hsa-miR-302a-5p;NC_000012.12_25887;NC_000004.12_10500;NC_000011.10_25384;hsa-miR-302c-5p;NC_000006.12_15769;hsa-miR-17-5p;NC_000013.11_27627;hsa-miR-26a-1-3p;hsa-miR-7-5p;NC_000002.12_3238;NC_000012.12_25503;NC_000011.10_25091;hsa-miR-512-3p;hsa-miR-3529-3p;NC_000003.12_7520;NC_000012.12_2…
KDM7A	ENST00000432045	0.7	3.61966e-49	33	hsa-miR-25-5p;hsa-miR-498;NC_000008.11_19445;hsa-miR-629-3p;NC_000012.12_25887;hsa-miR-18a-3p;NC_000011.10_25384;NC_000004.12_9892;NC_000009.12_21255;NC_000006.12_15769;hsa-miR-17-5p;hsa-miR-34c-5p;NC_000022.11_36372;hsa-miR-26a-1-3p;hsa-miR-7-5p;hsa-miR-515-5p;NC_000003.12_7520;hsa-miR-548d-3p;NC_000012.12_26721;hsa-miR-296-3p;NT_187601.1_39493>NC_000014.9_29213;hsa-miR-20a-5p;hsa-miR-302b-3p;hs…
ANK2	lnc-LY86-6:2	0.78125	4.12511e-49	35	hsa-miR-33b-3p;hsa-miR-25-5p;hsa-miR-372-5p;hsa-miR-371b-3p;NC_000010.11_23303;hsa-miR-92a-1-5p;hsa-miR-7974;hsa-miR-518e-5p>hsa-miR-519a-5p>hsa-miR-519b-5p>hsa-miR-519c-5p>hsa-miR-522-5p>hsa-miR-523-5p;NC_000003.12_7276;hsa-miR-3662;hsa-miR-510-5p;NC_000007.14_17821;NC_000003.12_8583;hsa-miR-27b-5p;NC_000010.11_23646;NC_000011.10_25384;NC_000005.10_11919>NC_000005.10_11920;NC_000012.12_26286;NC_…
ZEB1	ENST00000263967	0.410959	4.16054e-49	35	hsa-miR-372-5p;NC_000013.11_28441;hsa-miR-30c-1-3p;hsa-miR-92a-1-5p;hsa-miR-629-3p;NC_000012.12_25887;NC_000011.10_25384;NC_000018.10_33742;NC_000004.12_9892;hsa-miR-302c-5p;NC_000006.12_15769;NC_000013.11_27627;hsa-miR-26a-1-3p;hsa-miR-7-5p;NC_000002.12_3238;NC_000011.10_25091;hsa-miR-519a-3p;NC_000015.10_30316;hsa-miR-15b-3p;hsa-miR-345-5p;NC_000016.10_31157;NC_000012.12_26414;hsa-miR-296-3p;NT…
VDR	ENST00000281092	0.245	4.18157e-49	35	hsa-miR-934;hsa-miR-33b-3p;hsa-miR-372-5p;hsa-miR-498;hsa-miR-371b-3p;hsa-miR-92a-1-5p;hsa-miR-629-3p;hsa-miR-27b-5p;NC_000012.12_25887;NC_000021.9_35751;hsa-miR-18a-3p;NC_000011.10_25384;NC_000004.12_9892;NC_000005.10_11919>NC_000005.10_11920;hsa-miR-302c-5p;NC_000006.12_15769;hsa-miR-34c-5p;NC_000013.11_27627;NC_000022.11_36372;NC_000005.10_14158;hsa-miR-26a-1-3p;hsa-miR-1257;NC_000001.11_3101;…
TMEM156	ENST00000281092	0.295	4.18317e-49	37	NC_000006.12_14671;hsa-miR-372-5p;hsa-miR-30c-1-3p;hsa-miR-371b-3p;hsa-miR-629-3p;hsa-miR-1298-5p;hsa-miR-27b-5p;NC_000021.9_35751;NC_000012.12_25887;hsa-miR-18a-3p;NC_000011.10_25384;NC_000005.10_11919>NC_000005.10_11920;NC_000012.12_26286;NC_000006.12_15769;hsa-miR-17-5p;hsa-miR-34c-5p;NC_000013.11_27627;NC_000005.10_14158;hsa-miR-1257;NC_000001.11_3101;NC_000008.11_20037*;NC_000002.12_3238;NC_…
BAHCC1	ENST00000281092	0.29	4.18317e-49	37	NC_000006.12_14671;hsa-miR-372-5p;hsa-miR-30c-1-3p;hsa-miR-371b-3p;hsa-miR-92a-1-5p;hsa-miR-629-3p;hsa-miR-27b-5p;NC_000021.9_35751;NC_000012.12_25887;hsa-miR-18a-3p;NC_000011.10_25384;NC_000004.12_9892;NC_000005.10_11919>NC_000005.10_11920;NC_000012.12_26286;NC_000006.12_15769;hsa-miR-17-5p;hsa-miR-34c-5p;NC_000013.11_27627;NC_000005.10_14158;hsa-miR-7-5p;NC_000002.12_3238;NC_000003.12_7973;NC_0…
PRDM1	ENST00000263967	0.349315	4.27421e-49	34	hsa-miR-372-5p;NC_000013.11_28441;hsa-miR-30c-1-3p;hsa-miR-498;hsa-miR-92a-1-5p;hsa-miR-629-3p;hsa-miR-3662;NC_000012.12_25887;NC_000004.12_10500;NC_000011.10_25384;NC_000018.10_33742;NC_000004.12_9892;NC_000005.10_11919>NC_000005.10_11920;NC_000009.12_21255;hsa-miR-302c-5p;NC_000006.12_15769;hsa-miR-26a-1-3p;hsa-miR-1257;hsa-miR-7-5p;NC_000015.10_30316;hsa-miR-15b-3p;hsa-miR-302b-5p;hsa-miR-345-…
HIPK2	XR_428151	0.821429	4.35216e-49	34	hsa-miR-934;hsa-miR-33b-3p;NC_000006.12_14671;hsa-miR-30c-1-3p;NC_000008.11_19445;hsa-miR-498;NC_000010.11_23303;NC_000007.14_17821;hsa-miR-18a-3p;NC_000011.10_25384;NC_000004.12_9892;NC_000006.12_15769;hsa-miR-17-5p;hsa-miR-34c-5p;NC_000022.11_36372;NC_000002.12_3238;NC_000003.12_7973;NC_000011.10_25091;hsa-miR-519a-3p;NC_000015.10_30316;hsa-miR-515-5p;hsa-miR-517a-3p>hsa-miR-517b-3p;hsa-miR-548…
NTN4	NONHSAT215932	0.327731	4.40475e-49	32	hsa-miR-33b-3p;NC_000013.11_28441;NC_000023.11_36905;hsa-miR-92a-1-5p;hsa-miR-7974;NC_000010.11_23646;NC_000021.9_35751;NC_000012.12_25887;hsa-miR-302c-5p;NC_000006.12_15769;hsa-miR-17-5p;hsa-miR-34c-5p;NC_000013.11_27627;NC_000002.12_3238;NC_000003.12_9133;NC_000003.12_7973;NC_000016.10_31157;hsa-let-7c-5p;hsa-miR-296-3p;NT_187601.1_39493>NC_000014.9_29213;hsa-miR-20a-5p;NC_000009.12_21925;hsa-m…
TBC1D19	ENST00000261530	0.27551	4.5552e-49	37	hsa-miR-934;hsa-miR-372-5p;hsa-miR-30c-1-3p;hsa-miR-92a-1-5p;hsa-miR-629-3p;hsa-miR-1298-5p;NC_000021.9_35751;NC_000012.12_25887;hsa-miR-18a-3p;NC_000011.10_25384;NC_000018.10_33742;NC_000005.10_11919>NC_000005.10_11920;hsa-miR-34c-5p;NC_000006.12_15809;NC_000005.10_14158;NC_000022.11_36437;hsa-miR-1257;hsa-miR-7-5p;NC_000003.12_7973;NC_000012.12_25503;NC_000015.10_30316;hsa-miR-345-5p;hsa-miR-35…
ZNF385D	NR_033268	0.366972	5.52299e-49	35	NC_000009.12_21574;hsa-miR-372-5p;hsa-miR-3155a;NC_000013.11_28441;hsa-miR-30c-1-3p;NC_000023.11_36905;NC_000010.11_23303;hsa-miR-371b-3p;hsa-miR-92a-1-5p;NC_000007.14_17821;hsa-miR-510-5p;NC_000010.11_23646;NC_000021.9_35751;NC_000003.12_8583;hsa-miR-18a-3p;NC_000012.12_25887;hsa-miR-302c-5p;hsa-miR-26a-1-3p;hsa-miR-7-5p;NC_000001.11_3101;NC_000002.12_3238;NC_000003.12_9133;hsa-miR-512-3p;NC_000…
CHD9	ENST00000395116	0.78	5.54867e-49	30	hsa-miR-498;hsa-miR-629-3p;NC_000012.12_25887;hsa-miR-18a-3p;NC_000011.10_25384;NC_000004.12_9892;hsa-miR-17-5p;NC_000013.11_27627;hsa-miR-1257;hsa-miR-26a-1-3p;hsa-miR-7-5p;NC_000008.11_20037*;NC_000003.12_7973;NC_000011.10_25091;hsa-miR-515-5p;NC_000012.12_26414;NC_000018.10_33037;hsa-miR-548d-3p;hsa-miR-302b-3p;hsa-miR-20a-5p;hsa-miR-3143;hsa-miR-582-5p;hsa-miR-520c-3p;hsa-miR-373-5p;hsa-miR-5…
ANK2	NR_034072	0.761905	5.91618e-49	36	hsa-miR-25-5p;hsa-miR-372-5p;NC_000013.11_28441;hsa-miR-30c-1-3p;hsa-miR-371b-3p;hsa-miR-7974;hsa-miR-3662;hsa-miR-510-5p;NC_000012.12_25887;NC_000004.12_10500;NC_000011.10_25384;hsa-miR-302c-5p;NC_000006.12_15769;hsa-miR-17-5p;NC_000006.12_15809;NC_000013.11_27627;hsa-miR-26a-1-3p;hsa-miR-7-5p;NC_000002.12_3238;NC_000012.12_25503;NC_000011.10_25091;hsa-miR-512-3p;hsa-miR-345-5p;hsa-miR-3529-3p;N…
SOS2	ENST00000432045	0.4375	6.11231e-49	29	NC_000006.12_14671;hsa-miR-25-5p;hsa-miR-372-5p;hsa-miR-30c-1-3p;NC_000008.11_19445;hsa-miR-498;NC_000003.12_7276;NC_000012.12_25887;NC_000011.10_25384;NC_000004.12_9892;NC_000006.12_15769;hsa-miR-17-5p;NC_000022.11_36372;hsa-miR-26a-1-3p;hsa-miR-7-5p;NC_000011.10_25091;hsa-miR-515-5p;NC_000012.12_26721;hsa-miR-302b-3p;NT_187601.1_39493>NC_000014.9_29213;hsa-miR-20a-5p;hsa-miR-3143;hsa-miR-582-5p…
HIVEP2	ENST00000237264	0.541176	6.48632e-49	37	NC_000013.11_28441;NC_000005.10_12140;NC_000008.11_19445;hsa-miR-92a-1-5p;hsa-miR-7974;hsa-miR-3662;hsa-miR-1298-5p;hsa-miR-27b-5p;NC_000021.9_35751;NC_000012.12_25887;hsa-miR-18a-3p;NC_000011.10_25384;NC_000004.12_9892;hsa-miR-302c-5p;NC_000006.12_15769;hsa-miR-34c-5p;NC_000013.11_27627;NC_000022.11_36372;NC_000022.11_36437;hsa-miR-26a-1-3p;hsa-miR-7-5p;NC_000001.11_3101;NC_000002.12_3238;NC_000…
MXD1	NR_034072	0.650794	7.21427e-49	33	NC_000013.11_28441;hsa-miR-30c-1-3p;hsa-miR-371b-3p;hsa-miR-7974;hsa-miR-3662;hsa-miR-510-5p;hsa-miR-302a-5p;NC_000012.12_25887;NC_000004.12_10500;NC_000011.10_25384;hsa-miR-302c-5p;NC_000006.12_15769;hsa-miR-17-5p;NC_000006.12_15809;hsa-miR-26a-1-3p;NC_000002.12_3238;NC_000012.12_25503;NC_000011.10_25091;hsa-miR-512-3p;hsa-miR-345-5p;hsa-miR-3529-3p;NC_000003.12_7520;hsa-miR-526b-5p;hsa-miR-296-…
ABLIM3	NONHSAT215932	0.344538	7.26037e-49	34	hsa-miR-934;hsa-miR-372-5p;NC_000013.11_28441;hsa-miR-30c-1-3p;NC_000023.11_36905;NC_000010.11_23303;hsa-miR-92a-1-5p;hsa-miR-7974;NC_000011.10_25384;NC_000005.10_11919>NC_000005.10_11920;hsa-miR-302c-5p;NC_000012.12_26286;hsa-miR-17-5p;hsa-miR-34c-5p;hsa-miR-26a-1-3p;NC_000002.12_3238;NC_000003.12_7973;NC_000011.10_25091;NC_000015.10_30316;hsa-miR-15b-3p;NC_000003.12_7520;NC_000009.12_21957;NC_0…
ATP2B4	ENST00000563635	0.621622	8.38894e-49	36	hsa-miR-934;NC_000006.12_14671;hsa-miR-372-5p;NC_000013.11_28441;hsa-miR-3155a;hsa-miR-498;NC_000005.10_12588;hsa-miR-3662;NC_000007.14_17821;hsa-miR-302a-5p;NC_000021.9_35751;NC_000003.12_8583;hsa-miR-18a-3p;NC_000012.12_25887;NC_000011.10_25384;NC_000004.12_9892;NC_000006.12_15769;hsa-miR-17-5p;NC_000022.11_36437;hsa-miR-26a-1-3p;hsa-miR-519a-3p;hsa-miR-512-3p;hsa-miR-517a-3p>hsa-miR-517b-3p;NC…
GRB10	lnc-LY86-6:2	0.640625	8.48991e-49	33	hsa-miR-33b-3p;hsa-miR-25-5p;hsa-miR-372-5p;NC_000010.11_23303;hsa-miR-92a-1-5p;hsa-miR-7974;hsa-miR-518e-5p>hsa-miR-519a-5p>hsa-miR-519b-5p>hsa-miR-519c-5p>hsa-miR-522-5p>hsa-miR-523-5p;hsa-miR-3662;hsa-miR-510-5p;hsa-miR-27b-5p;NC_000003.12_8583;NC_000010.11_23646;NC_000011.10_25384;NC_000005.10_11919>NC_000005.10_11920;NC_000012.12_26286;NC_000006.12_15769;hsa-miR-34c-5p;hsa-miR-1257;hsa-miR-7…
PLEKHM1	ENST00000261530	0.239796	8.68552e-49	35	hsa-miR-33b-3p;NC_000006.12_14671;hsa-miR-30c-1-3p;NC_000023.11_36905;NC_000010.11_23303;hsa-miR-629-3p;NC_000007.14_17821;hsa-miR-27b-5p;NC_000012.12_25887;hsa-miR-18a-3p;NC_000011.10_25384;hsa-miR-17-5p;hsa-miR-34c-5p;hsa-miR-26a-1-3p;hsa-miR-7-5p;NC_000001.11_3101;NC_000002.12_3238;NC_000003.12_7973;NC_000012.12_25503;NC_000015.10_30316;hsa-miR-345-5p;hsa-miR-3529-3p;NC_000020.11_35116;NC_0000…
OSTM1	ENST00000263967	0.438356	8.89198e-49	33	NC_000013.11_28441;hsa-miR-92a-1-5p;hsa-miR-629-3p;hsa-miR-3662;NC_000007.14_17821;NC_000010.11_23646;NC_000012.12_25887;NC_000011.10_25384;NC_000004.12_9892;NC_000009.12_21255;NC_000006.12_15769;hsa-miR-17-5p;NC_000013.11_27627;hsa-miR-7-5p;NC_000002.12_3238;hsa-miR-519a-3p;NC_000015.10_30316;hsa-miR-15b-3p;hsa-miR-345-5p;NC_000012.12_26414;NC_000018.10_33037;NC_000012.12_26721;NT_187601.1_39493…
IARS	ENST00000263967	0.273973	8.89198e-49	33	hsa-miR-33b-3p;hsa-miR-372-5p;hsa-miR-30c-1-3p;hsa-miR-498;hsa-miR-371b-3p;hsa-miR-92a-1-5p;hsa-miR-3662;NC_000007.14_17821;NC_000010.11_23646;NC_000012.12_25887;NC_000004.12_10500;NC_000011.10_25384;NC_000018.10_33742;NC_000006.12_15769;hsa-miR-17-5p;hsa-miR-1257;hsa-miR-7-5p;NC_000015.10_30316;NC_000003.12_7520;NC_000020.11_35116;NC_000012.12_26414;hsa-let-7c-5p;hsa-miR-296-3p;NT_187601.1_39493…
SLC38A2	ENST00000263967	0.363014	8.89198e-49	33	hsa-miR-33b-3p;NC_000013.11_28441;hsa-miR-7974;hsa-miR-629-3p;hsa-miR-3662;NC_000012.12_25887;NC_000011.10_25384;NC_000004.12_9892;hsa-miR-302c-5p;NC_000006.12_15769;NC_000013.11_27627;NC_000022.11_36437;hsa-miR-26a-1-3p;hsa-miR-7-5p;NC_000002.12_3238;NC_000015.10_30316;hsa-miR-345-5p;NC_000003.12_7520;NC_000018.10_33037;NC_000012.12_26721;hsa-miR-296-3p;hsa-miR-302b-3p;hsa-miR-3143;NC_000007.14_…
PLEKHH2	ENST00000263967	0.369863	8.89198e-49	33	hsa-miR-33b-3p;hsa-miR-372-5p;hsa-miR-30c-1-3p;NC_000012.12_25887;NC_000011.10_25384;NC_000018.10_33742;NC_000005.10_11919>NC_000005.10_11920;NC_000004.12_9892;NC_000009.12_21255;NC_000006.12_15769;hsa-miR-17-5p;hsa-miR-1257;NC_000011.10_25091;hsa-miR-519a-3p;NC_000015.10_30316;hsa-miR-15b-3p;hsa-miR-345-5p;NC_000003.12_7520;NC_000012.12_26414;NC_000018.10_33037;NT_187601.1_39493>NC_000014.9_2921…
GLS	ENST00000263967	0.383562	1.09926e-48	35	hsa-miR-934;hsa-miR-33b-3p;NC_000013.11_28441;hsa-miR-30c-1-3p;hsa-miR-498;hsa-miR-7974;hsa-miR-629-3p;hsa-miR-3662;NC_000012.12_25887;NC_000004.12_10500;NC_000011.10_25384;NC_000005.10_11919>NC_000005.10_11920;NC_000009.12_21255;hsa-miR-302c-5p;NC_000006.12_15769;NC_000013.11_27627;hsa-miR-7-5p;hsa-miR-15b-3p;hsa-miR-302b-5p;hsa-miR-345-5p;NC_000020.11_35116;NC_000012.12_26414;NC_000012.12_26721…
PDLIM5	NR_038921	0.51	1.09926e-48	35	hsa-miR-372-5p;NC_000008.11_19445;hsa-miR-7974;hsa-miR-518e-5p>hsa-miR-519a-5p>hsa-miR-519b-5p>hsa-miR-519c-5p>hsa-miR-522-5p>hsa-miR-523-5p;hsa-miR-3662;NC_000007.14_17821;hsa-miR-27b-5p;NC_000021.9_35751;NC_000012.12_25887;NC_000011.10_25384;NC_000009.12_21255;hsa-miR-302c-5p;NC_000012.12_26286;NC_000006.12_15769;hsa-miR-17-5p;NC_000013.11_27627;NC_000022.11_36372;hsa-miR-26a-1-3p;hsa-miR-1257;…
EPRS	ENST00000281092	0.265	1.13827e-48	33	hsa-miR-372-5p;hsa-miR-498;hsa-miR-92a-1-5p;hsa-miR-18a-3p;NC_000011.10_25384;NC_000004.12_9892;NC_000005.10_11919>NC_000005.10_11920;NC_000012.12_26286;hsa-miR-17-5p;hsa-miR-34c-5p;NC_000006.12_15809;NC_000013.11_27627;hsa-miR-26a-1-3p;NC_000002.12_3238;NC_000008.11_20037*;NC_000011.10_25091;hsa-miR-3529-3p;NC_000003.12_7520;hsa-miR-517a-3p>hsa-miR-517b-3p;NC_000012.12_26414;NC_000018.10_33037;h…
CLIC4	ENST00000281092	0.235	1.13827e-48	33	hsa-miR-934;hsa-miR-30c-1-3p;NC_000008.11_19445;hsa-miR-92a-1-5p;NC_000021.9_35751;NC_000011.10_25384;NC_000004.12_9892;hsa-miR-302c-5p;hsa-miR-17-5p;NC_000013.11_27627;NC_000022.11_36372;hsa-miR-1257;hsa-miR-26a-1-3p;hsa-miR-7-5p;NC_000008.11_20037*;hsa-miR-15b-3p;hsa-miR-3529-3p;hsa-miR-515-5p;NC_000003.12_7520;hsa-miR-517a-3p>hsa-miR-517b-3p;hsa-miR-548d-3p;NT_187601.1_39493>NC_000014.9_29213;…
KLHL5	ENST00000281092	0.375	1.14113e-48	37	hsa-miR-934;NC_000006.12_14671;hsa-miR-372-5p;hsa-miR-30c-1-3p;hsa-miR-675-5p;hsa-miR-629-3p;hsa-miR-1298-5p;NC_000021.9_35751;NC_000012.12_25887;NC_000011.10_25384;hsa-miR-302c-5p;NC_000006.12_15769;hsa-miR-17-5p;NC_000022.11_36372;NC_000005.10_14158;hsa-miR-7-5p;NC_000001.11_3101;NC_000002.12_3238;NC_000008.11_20037*;NC_000003.12_7973;hsa-miR-15b-3p;hsa-miR-3529-3p;NC_000020.11_35116;hsa-miR-51…
FAM63B	ENST00000263967	0.390411	1.24943e-48	32	hsa-miR-934;hsa-miR-372-5p;hsa-miR-30c-1-3p;hsa-miR-498;hsa-miR-629-3p;NC_000007.14_17821;NC_000012.12_25887;NC_000011.10_25384;NC_000018.10_33742;NC_000005.10_11919>NC_000005.10_11920;NC_000004.12_9892;NC_000009.12_21255;NC_000006.12_15769;hsa-miR-17-5p;NC_000013.11_27627;hsa-miR-1257;hsa-miR-519a-3p;NC_000003.12_7520;NC_000020.11_35116;NC_000012.12_26414;NC_000012.12_26721;hsa-miR-302b-3p;hsa-m…
SLC39A10	lnc-POTED-16:1	0.793651	1.25253e-48	32	hsa-miR-1323;hsa-miR-372-5p;NC_000013.11_28441;NC_000008.11_19445;NC_000010.11_23303;hsa-miR-92a-1-5p;hsa-miR-3662;NC_000007.14_17821;hsa-miR-27b-5p;NC_000012.12_25887;NC_000011.10_25384;NC_000012.12_26286;NC_000006.12_15769;hsa-miR-17-5p;NC_000011.10_25091;hsa-miR-519a-3p;hsa-miR-15b-3p;hsa-miR-302b-5p;hsa-miR-515-5p;NC_000003.12_7520;NC_000018.10_33037;hsa-miR-548d-3p;hsa-miR-302b-3p;hsa-miR-20…
SLC7A11	NR_038921	0.63	1.32453e-48	37	hsa-miR-372-5p;NC_000013.11_28441;hsa-miR-30c-1-3p;NC_000008.11_19445;hsa-miR-518e-5p>hsa-miR-519a-5p>hsa-miR-519b-5p>hsa-miR-519c-5p>hsa-miR-522-5p>hsa-miR-523-5p;hsa-miR-3662;NC_000007.14_17821;hsa-miR-27b-5p;NC_000021.9_35751;NC_000012.12_25887;NC_000011.10_25384;hsa-miR-302c-5p;NC_000012.12_26286;NC_000006.12_15769;hsa-miR-17-5p;NC_000006.12_15809;NC_000022.11_36372;hsa-miR-1257;hsa-miR-26a-1…
SLC7A11	NONHSAT215932	0.630252	1.32453e-48	37	hsa-miR-934;hsa-miR-372-5p;NC_000013.11_28441;hsa-miR-30c-1-3p;NC_000023.11_36905;hsa-miR-518e-5p>hsa-miR-519a-5p>hsa-miR-519b-5p>hsa-miR-519c-5p>hsa-miR-522-5p>hsa-miR-523-5p;NC_000007.14_17821;NC_000010.11_23646;NC_000021.9_35751;NC_000012.12_25887;NC_000011.10_25384;hsa-miR-302c-5p;NC_000012.12_26286;NC_000006.12_15769;hsa-miR-17-5p;hsa-miR-26a-1-3p;hsa-miR-1257;NC_000002.12_3238;NC_000003.12_…
ZMYM6	ENST00000261530	0.280612	1.32453e-48	37	NC_000006.12_14671;hsa-miR-372-5p;NC_000013.11_28441;hsa-miR-30c-1-3p;NC_000008.11_19445;hsa-miR-92a-1-5p;hsa-miR-629-3p;NC_000007.14_17821;NC_000010.11_23646;NC_000021.9_35751;NC_000011.10_25384;NC_000004.12_9892;hsa-miR-302c-5p;hsa-miR-26a-1-3p;NC_000022.11_36437;hsa-miR-7-5p;NC_000001.11_3101;NC_000002.12_3238;NC_000003.12_7973;hsa-miR-519a-3p;NC_000015.10_30316;hsa-miR-3529-3p;NC_000003.12_75…
VTI1A	NONHSAT219565	0.811321	1.36871e-48	36	hsa-miR-934;NC_000006.12_14671;NC_000013.11_28441;NC_000009.12_20733;NC_000008.11_19445;NC_000023.11_36905;hsa-miR-498;hsa-miR-3662;hsa-miR-510-5p;hsa-miR-302a-5p;NC_000003.12_8583;NC_000011.10_25384;hsa-miR-17-5p;hsa-miR-34c-5p;NC_000022.11_36372;NC_000002.12_3238;NC_000003.12_7973;NC_000018.10_33480;NC_000012.12_25503;hsa-miR-519a-3p;NC_000015.10_30316;hsa-miR-15b-3p;hsa-miR-302b-5p;NC_000003.1…
SOS2	ENST00000261530	0.244898	1.4577e-48	33	hsa-miR-33b-3p;NC_000006.12_14671;hsa-miR-1323;hsa-miR-25-5p;hsa-miR-372-5p;hsa-miR-30c-1-3p;NC_000008.11_19445;NC_000023.11_36905;hsa-miR-498;NC_000003.12_7276;NC_000021.9_35751;NC_000012.12_25887;NC_000011.10_25384;NC_000004.12_9892;NC_000005.10_11919>NC_000005.10_11920;hsa-miR-17-5p;hsa-miR-26a-1-3p;hsa-miR-7-5p;NC_000001.11_3101;hsa-miR-519a-3p;hsa-miR-515-5p;NC_000012.12_26414;NT_187601.1_39…
PNPLA8	lnc-CXorf64-5:1	0.829268	1.53201e-48	29	hsa-miR-33b-3p;NC_000006.12_14671;hsa-miR-30c-1-3p;hsa-miR-498;hsa-miR-371b-3p;NC_000010.11_23646;NC_000021.9_35751;NC_000011.10_25384;hsa-miR-302c-5p;NC_000013.11_27627;NC_000022.11_36372;NC_000022.11_36437;NC_000003.12_9133;NC_000018.10_33480;hsa-miR-519a-3p;hsa-miR-15b-3p;NC_000003.12_7520;NC_000018.10_33037;hsa-let-7c-5p;hsa-miR-526b-5p;hsa-miR-296-3p;NT_187601.1_39493>NC_000014.9_29213;hsa-m…
GFPT1	ENST00000563635	0.608108	1.60452e-48	36	hsa-miR-934;hsa-miR-33b-3p;hsa-miR-372-5p;hsa-miR-3155a;NC_000008.11_19445;hsa-miR-498;hsa-miR-3662;NC_000007.14_17821;NC_000003.12_8583;NC_000012.12_25887;hsa-miR-18a-3p;NC_000004.12_9892;hsa-miR-302c-5p;NC_000006.12_15769;hsa-miR-17-5p;NC_000022.11_36372;NC_000022.11_36437;NC_000001.11_3101;NC_000008.11_20037*;NC_000012.12_25503;hsa-miR-519a-3p;NC_000015.10_30316;hsa-miR-512-3p;hsa-miR-3529-3p;…
EDC3	NR_033268	0.366972	1.9138e-48	32	hsa-miR-371a-5p;hsa-miR-3155a;hsa-miR-30c-1-3p;NC_000023.11_36905;NC_000010.11_23303;hsa-miR-371b-3p;hsa-miR-518e-5p>hsa-miR-519a-5p>hsa-miR-519b-5p>hsa-miR-519c-5p>hsa-miR-522-5p>hsa-miR-523-5p;NC_000003.12_7276;NC_000007.14_17821;hsa-miR-510-5p;hsa-miR-1298-5p;hsa-miR-302a-5p;NC_000003.12_8583;hsa-miR-18a-3p;NC_000022.11_36372;hsa-miR-26a-1-3p;NC_000005.10_14158;hsa-miR-7-5p;NC_000002.12_3238;N…
RBKS	NR_033268	0.366972	1.9138e-48	32	hsa-miR-934;hsa-miR-371a-5p;NC_000009.12_20733;hsa-miR-30c-1-3p;hsa-miR-92a-1-5p;hsa-miR-7974;hsa-miR-629-3p;NC_000007.14_17821;hsa-miR-302a-5p;NC_000010.11_23646;NC_000021.9_35751;hsa-miR-18a-3p;NC_000012.12_26286;hsa-miR-17-5p;hsa-miR-26a-1-3p;hsa-miR-7-5p;NC_000001.11_3101;NC_000003.12_9133;hsa-miR-512-3p;hsa-miR-302b-5p;NC_000003.12_7520;NC_000007.14_16719;NC_000009.12_21957;NC_000012.12_2641…
MXD1	NR_038921	0.54	2.22146e-48	36	NC_000013.11_28441;hsa-miR-30c-1-3p;hsa-miR-371b-3p;hsa-miR-7974;hsa-miR-518e-5p>hsa-miR-519a-5p>hsa-miR-519b-5p>hsa-miR-519c-5p>hsa-miR-522-5p>hsa-miR-523-5p;hsa-miR-3662;NC_000007.14_17821;NC_000012.12_25887;NC_000011.10_25384;NC_000005.10_11919>NC_000005.10_11920;NC_000009.12_21255;hsa-miR-302c-5p;NC_000006.12_15769;hsa-miR-17-5p;NC_000006.12_15809;NC_000022.11_36372;hsa-miR-26a-1-3p;hsa-miR-1…
ZBTB21	ENST00000261530	0.285714	2.23987e-48	32	NC_000001.11_2008;hsa-miR-30c-1-3p;NC_000008.11_19445;hsa-miR-498;hsa-miR-629-3p;NC_000012.12_25887;NC_000011.10_25384;NC_000018.10_33742;NC_000004.12_9892;hsa-miR-17-5p;hsa-miR-34c-5p;NC_000013.11_27627;hsa-miR-26a-1-3p;hsa-miR-7-5p;hsa-miR-519a-3p;hsa-miR-345-5p;hsa-miR-3529-3p;hsa-miR-515-5p;NC_000020.11_35116;NC_000012.12_26414;hsa-miR-548d-3p;hsa-miR-302b-3p;hsa-miR-20a-5p;hsa-miR-3143;hsa-m…
SLC7A11	NR_033856	0.764706	2.23987e-48	32	NC_000009.12_21574;hsa-miR-372-5p;NC_000013.11_28441;NC_000023.11_36905;hsa-miR-3662;NC_000010.11_23646;hsa-miR-302c-5p;hsa-miR-17-5p;NC_000022.11_36372;hsa-miR-7-5p;NC_000001.11_3101;NC_000002.12_3238;NC_000003.12_9133;NC_000003.12_7973;hsa-miR-520a-3p;NC_000012.12_25503;hsa-miR-512-3p;hsa-miR-15b-3p;hsa-miR-345-5p;NC_000007.14_17824;NC_000001.11_2997;hsa-miR-92a-3p;NC_000012.12_26414;hsa-miR-30…
MTMR2	NONHSAT215932	0.352941	2.31302e-48	33	hsa-miR-372-5p;NC_000013.11_28441;hsa-miR-30c-1-3p;NC_000023.11_36905;NC_000010.11_23303;hsa-miR-7974;NC_000012.12_25887;NC_000005.10_11919>NC_000005.10_11920;NC_000012.12_26286;NC_000006.12_15769;hsa-miR-34c-5p;NC_000013.11_27627;NC_000005.10_14158;hsa-miR-1257;hsa-miR-26a-1-3p;NC_000002.12_3238;NC_000003.12_9133;NC_000003.12_7973;NC_000011.10_25091;hsa-miR-15b-3p;NC_000009.12_21957;NC_000012.12…
RASGRP3	NONHSAT215932	0.369748	2.31302e-48	33	hsa-miR-33b-3p;hsa-miR-372-5p;hsa-miR-498;NC_000010.11_23303;hsa-miR-518e-5p>hsa-miR-519a-5p>hsa-miR-519b-5p>hsa-miR-519c-5p>hsa-miR-522-5p>hsa-miR-523-5p;NC_000007.14_17821;NC_000010.11_23646;NC_000012.12_25887;NC_000011.10_25384;hsa-miR-302c-5p;NC_000012.12_26286;NC_000006.12_15769;hsa-miR-17-5p;hsa-miR-34c-5p;NC_000013.11_27627;hsa-miR-26a-1-3p;hsa-miR-1257;NC_000002.12_3238;NC_000003.12_7973;…
MLLT4	NONHSAT215932	0.319328	2.31302e-48	33	hsa-miR-934;hsa-miR-33b-3p;hsa-miR-372-5p;NC_000013.11_28441;hsa-miR-30c-1-3p;hsa-miR-498;NC_000023.11_36905;NC_000010.11_23303;hsa-miR-92a-1-5p;hsa-miR-7974;NC_000007.14_17821;NC_000012.12_25887;NC_000011.10_25384;NC_000012.12_26286;NC_000006.12_15769;hsa-miR-34c-5p;NC_000013.11_27627;hsa-miR-26a-1-3p;NC_000002.12_3238;NC_000011.10_25091;hsa-miR-15b-3p;NC_000003.12_7520;NC_000016.10_31157;NC_000…
SLC7A11	NONHSAT224112	0.653333	2.37216e-48	36	hsa-miR-372-5p;hsa-miR-3155a;NC_000013.11_28441;NC_000008.11_19445;hsa-miR-3662;NC_000007.14_17821;NC_000012.12_25887;NC_000004.12_10500;NC_000006.12_15769;NC_000022.11_36372;hsa-miR-26a-1-3p;hsa-miR-7-5p;NC_000003.12_9133;hsa-miR-520a-3p;hsa-miR-512-3p;hsa-miR-345-5p;hsa-miR-5585-3p;hsa-miR-92a-3p;NC_000009.12_21957;NC_000016.10_31157;NC_000018.10_33037;hsa-let-7c-5p;hsa-miR-1284;NC_000018.10_33…
KDM7A	NONHSAT224112	0.68	2.48585e-48	35	hsa-miR-3155a;NC_000008.11_19445;hsa-miR-498;NC_000010.11_23303;hsa-miR-92a-1-5p;hsa-miR-629-3p;hsa-miR-3662;NC_000007.14_17821;NC_000012.12_25887;hsa-miR-18a-3p;NC_000004.12_10500;NC_000006.12_15769;NC_000022.11_36372;hsa-miR-26a-1-3p;hsa-miR-7-5p;NC_000003.12_9133;hsa-miR-512-3p;hsa-miR-345-5p;NC_000016.10_31157;NC_000018.10_33037;hsa-miR-1284;NT_187601.1_39493>NC_000014.9_29213;hsa-miR-302b-3p…
FBXO32	NONHSAT215932	0.394958	2.61694e-48	35	hsa-miR-372-5p;hsa-miR-30c-1-3p;NC_000010.11_23303;hsa-miR-7974;NC_000007.14_17821;NC_000012.12_25887;NC_000011.10_25384;hsa-miR-302c-5p;NC_000012.12_26286;NC_000006.12_15769;hsa-miR-17-5p;hsa-miR-34c-5p;NC_000013.11_27627;hsa-miR-1257;hsa-miR-26a-1-3p;NC_000003.12_9133;NC_000003.12_7973;NC_000015.10_30316;hsa-miR-15b-3p;NC_000020.11_35116;NC_000003.12_7520;NC_000016.10_31157;NC_000012.12_26414;h…
SLC39A10	NR_034072	0.746032	2.74294e-48	33	hsa-miR-934;hsa-miR-1323;hsa-miR-25-5p;hsa-miR-372-5p;NC_000013.11_28441;hsa-miR-30c-1-3p;hsa-miR-371b-3p;hsa-miR-7974;hsa-miR-3662;NC_000012.12_25887;NC_000004.12_10500;NC_000011.10_25384;hsa-miR-302c-5p;NC_000006.12_15769;hsa-miR-17-5p;NC_000006.12_15809;NC_000013.11_27627;hsa-miR-26a-1-3p;NC_000002.12_3238;NC_000011.10_25091;hsa-miR-515-5p;NC_000003.12_7520;hsa-miR-526b-5p;NT_187601.1_39493>NC…
XIAP	NR_034072	0.650794	2.74294e-48	33	hsa-miR-934;hsa-miR-25-5p;hsa-miR-372-5p;NC_000013.11_28441;hsa-miR-30c-1-3p;hsa-miR-7974;hsa-miR-3662;hsa-miR-510-5p;hsa-miR-302a-5p;NC_000012.12_25887;NC_000004.12_10500;NC_000011.10_25384;hsa-miR-302c-5p;NC_000006.12_15769;hsa-miR-17-5p;NC_000013.11_27627;hsa-miR-26a-1-3p;hsa-miR-7-5p;NC_000002.12_3238;NC_000011.10_25091;hsa-miR-512-3p;hsa-miR-3529-3p;NC_000003.12_7520;NC_000012.12_26414;hsa-m…
PLEKHM1	NR_033268	0.357798	2.80799e-48	34	hsa-miR-3155a;NC_000009.12_20733;hsa-miR-30c-1-3p;NC_000023.11_36905;NC_000010.11_23303;hsa-miR-518b;hsa-miR-7974;hsa-miR-629-3p;NC_000007.14_17821;NC_000003.12_8583;NC_000012.12_25887;hsa-miR-18a-3p;NC_000012.12_26286;NC_000006.12_15769;hsa-miR-17-5p;hsa-miR-26a-1-3p;hsa-miR-7-5p;NC_000001.11_3101;NC_000002.12_3238;hsa-miR-345-5p;NC_000003.12_7520;NC_000020.11_35116;NC_000007.14_16719;NC_000012.…
TTN	NONHSAT224112	0.706667	2.81526e-48	37	hsa-miR-372-5p;hsa-miR-3155a;NC_000013.11_28441;NC_000010.11_23303;hsa-miR-92a-1-5p;hsa-miR-629-3p;hsa-miR-3662;NC_000007.14_17821;NC_000012.12_25887;hsa-miR-18a-3p;NC_000004.12_10500;NC_000006.12_15769;NC_000022.11_36372;hsa-miR-26a-1-3p;NC_000022.11_36437;hsa-miR-7-5p;hsa-miR-345-5p;hsa-miR-92a-3p;NC_000020.11_35116;NC_000007.14_16719;NC_000016.10_31157;NC_000018.10_33037;NT_187601.1_39493>NC_0…
MGEA5	ENST00000261530	0.295918	3.02436e-48	39	hsa-miR-934;hsa-miR-25-5p;hsa-miR-372-5p;NC_000013.11_28441;hsa-miR-371b-3p;hsa-miR-92a-1-5p;hsa-miR-629-3p;NC_000003.12_7276;NC_000007.14_17821;NC_000012.12_25887;hsa-miR-18a-3p;NC_000018.10_33742;hsa-miR-17-5p;hsa-miR-34c-5p;NC_000006.12_15809;hsa-miR-26a-1-3p;NC_000022.11_36437;hsa-miR-1257;hsa-miR-7-5p;NC_000001.11_3101;NC_000002.12_3238;hsa-miR-3529-3p;NC_000003.12_7520;hsa-miR-517a-3p>hsa-m…
CREBRF	XR_428151	0.75	3.07668e-48	31	hsa-miR-934;hsa-miR-30c-1-3p;NC_000008.11_19445;hsa-miR-498;NC_000007.14_17821;hsa-miR-18a-3p;NC_000011.10_25384;NC_000018.10_33742;NC_000004.12_9892;NC_000006.12_15769;hsa-miR-17-5p;hsa-miR-34c-5p;NC_000022.11_36372;hsa-miR-1257;NC_000002.12_3238;NC_000011.10_25091;hsa-miR-519a-3p;hsa-miR-3529-3p;hsa-miR-515-5p;hsa-miR-548d-3p;hsa-miR-296-3p;NT_187601.1_39493>NC_000014.9_29213;hsa-miR-20a-5p;hsa…
ABCC3	ENST00000261530	0.214286	3.16157e-48	35	hsa-miR-934;hsa-miR-33b-3p;hsa-miR-25-5p;hsa-miR-30c-1-3p;NC_000023.11_36905;NC_000010.11_23303;hsa-miR-371b-3p;hsa-miR-92a-1-5p;hsa-miR-629-3p;NC_000007.14_17821;hsa-miR-27b-5p;hsa-miR-1298-5p;NC_000010.11_23646;NC_000021.9_35751;hsa-miR-18a-3p;NC_000005.10_11919>NC_000005.10_11920;hsa-miR-17-5p;hsa-miR-34c-5p;NC_000005.10_14158;NC_000022.11_36437;hsa-miR-7-5p;NC_000001.11_3101;NC_000002.12_3238…
RGS3	NR_027379	0.868421	3.42204e-48	27	NC_000024.10_38844;NC_000010.11_22861;hsa-miR-26b-5p;NC_000002.12_3880;hsa-miR-148a-3p;NC_000003.12_9115;hsa-miR-21-5p;hsa-miR-9-5p;hsa-miR-499a-5p;hsa-miR-193a-5p;NC_000008.11_18787;hsa-miR-659-5p;NC_000011.10_24785;NC_000017.11_32431;hsa-miR-361-3p;hsa-miR-4435;NC_000014.9_29046;NC_000011.10_23807;hsa-miR-22-3p;hsa-miR-24-3p;hsa-miR-215-5p;hsa-miR-6807-5p;hsa-miR-4758-3p;hsa-miR-203a-3p;hsa-miR…
ANK2	NONHSAT219565	0.811321	3.5523e-48	36	NC_000006.12_14671;NC_000013.11_28441;NC_000009.12_20733;NC_000008.11_19445;NC_000023.11_36905;hsa-miR-3662;hsa-miR-510-5p;hsa-miR-27b-5p;NC_000003.12_8583;NC_000011.10_25384;hsa-miR-17-5p;hsa-miR-34c-5p;NC_000022.11_36372;NC_000002.12_3238;NC_000003.12_9133;NC_000003.12_7973;NC_000018.10_33480;NC_000012.12_25503;NC_000011.10_25091;NC_000015.10_30316;hsa-miR-15b-3p;hsa-miR-302b-5p;NC_000003.12_75…
TMEM156	ENST00000261530	0.280612	3.72411e-48	37	NC_000006.12_14671;hsa-miR-372-5p;NC_000013.11_28441;hsa-miR-30c-1-3p;NC_000023.11_36905;hsa-miR-371b-3p;hsa-miR-629-3p;NC_000003.12_7276;hsa-miR-27b-5p;NC_000007.14_17821;NC_000021.9_35751;NC_000012.12_25887;hsa-miR-18a-3p;hsa-miR-1298-5p;NC_000011.10_25384;NC_000005.10_11919>NC_000005.10_11920;hsa-miR-17-5p;hsa-miR-34c-5p;NC_000013.11_27627;NC_000005.10_14158;hsa-miR-1257;NC_000001.11_3101;NC_0…
CLHC1	ENST00000261530	0.316327	3.72411e-48	37	hsa-miR-934;hsa-miR-25-5p;hsa-miR-372-5p;NC_000013.11_28441;NC_000023.11_36905;hsa-miR-371b-3p;hsa-miR-92a-1-5p;NC_000003.12_7276;NC_000007.14_17821;hsa-miR-1298-5p;NC_000021.9_35751;NC_000012.12_25887;hsa-miR-18a-3p;NC_000011.10_25384;NC_000005.10_11919>NC_000005.10_11920;hsa-miR-302c-5p;NC_000013.11_27627;NC_000022.11_36437;hsa-miR-7-5p;NC_000001.11_3101;NC_000002.12_3238;NC_000003.12_7973;NC_0…
LACC1	ENST00000263967	0.30137	4.85593e-48	31	hsa-miR-33b-3p;hsa-miR-372-5p;hsa-miR-30c-1-3p;hsa-miR-498;hsa-miR-92a-1-5p;hsa-miR-7974;hsa-miR-629-3p;NC_000007.14_17821;NC_000012.12_25887;NC_000004.12_10500;NC_000011.10_25384;NC_000004.12_9892;NC_000006.12_15769;NC_000013.11_27627;NC_000022.11_36437;hsa-miR-26a-1-3p;NC_000002.12_3238;NC_000011.10_25091;hsa-miR-302b-5p;hsa-miR-345-5p;NC_000016.10_31157;NC_000012.12_26414;NC_000012.12_26721;hs…
ZNF704	NR_034072	0.746032	4.97114e-48	34	hsa-miR-934;NC_000013.11_28441;hsa-miR-30c-1-3p;hsa-miR-7974;hsa-miR-3662;hsa-miR-510-5p;hsa-miR-302a-5p;NC_000012.12_25887;NC_000004.12_10500;NC_000011.10_25384;hsa-miR-302c-5p;NC_000006.12_15769;hsa-miR-17-5p;NC_000013.11_27627;hsa-miR-26a-1-3p;hsa-miR-7-5p;NC_000002.12_3238;NC_000012.12_25503;NC_000011.10_25091;hsa-miR-512-3p;hsa-miR-345-5p;hsa-miR-3529-3p;NC_000003.12_7520;NC_000012.12_26414;…
EGFR	NONHSAT215932	0.403361	5.04793e-48	34	hsa-miR-372-5p;NC_000023.11_36905;hsa-miR-92a-1-5p;NC_000010.11_23646;NC_000012.12_25887;NC_000011.10_25384;NC_000012.12_26286;NC_000006.12_15769;hsa-miR-17-5p;hsa-miR-34c-5p;NC_000013.11_27627;hsa-miR-26a-1-3p;NC_000005.10_14158;NC_000002.12_3238;NC_000003.12_7973;NC_000011.10_25091;hsa-miR-519a-3p;NC_000015.10_30316;hsa-miR-15b-3p;NC_000020.11_35116;NC_000012.12_26414;hsa-miR-296-3p;NT_187601.1…
MXD1	NONHSAT224112	0.573333	5.2578e-48	35	hsa-miR-371a-5p;hsa-miR-3155a;NC_000013.11_28441;NC_000010.11_23303;hsa-miR-92a-1-5p;hsa-miR-629-3p;hsa-miR-3662;NC_000007.14_17821;NC_000012.12_25887;NC_000004.12_10500;NC_000006.12_15769;NC_000022.11_36372;hsa-miR-26a-1-3p;NC_000022.11_36437;NC_000003.12_9133;hsa-miR-520a-3p;hsa-miR-512-3p;hsa-miR-345-5p;hsa-miR-5585-3p;hsa-miR-92a-3p;NC_000018.10_33037;hsa-let-7c-5p;NC_000018.10_33504*;NT_1876…
TLCD2	NR_033268	0.422018	5.2578e-48	35	hsa-miR-371a-5p;hsa-miR-30c-1-3p;NC_000023.11_36905;NC_000010.11_23303;hsa-miR-92a-1-5p;hsa-miR-7974;hsa-miR-518e-5p>hsa-miR-519a-5p>hsa-miR-519b-5p>hsa-miR-519c-5p>hsa-miR-522-5p>hsa-miR-523-5p;NC_000003.12_7276;NC_000007.14_17821;hsa-miR-302a-5p;NC_000021.9_35751;NC_000012.12_25887;hsa-miR-18a-3p;NC_000006.12_15769;NC_000005.10_14158;hsa-miR-26a-1-3p;hsa-miR-7-5p;NC_000002.12_3238;NC_000003.12_…
GRB10	ENST00000237264	0.482353	5.29302e-48	37	hsa-miR-33b-3p;NC_000006.12_14671;hsa-miR-92a-1-5p;hsa-miR-7974;hsa-miR-518e-5p>hsa-miR-519a-5p>hsa-miR-519b-5p>hsa-miR-519c-5p>hsa-miR-522-5p>hsa-miR-523-5p;hsa-miR-3662;hsa-miR-510-5p;hsa-miR-27b-5p;NC_000012.12_25887;hsa-miR-18a-3p;NC_000011.10_25384;NC_000005.10_11919>NC_000005.10_11920;hsa-miR-302c-5p;NC_000006.12_15769;hsa-miR-34c-5p;NC_000006.12_15809;NC_000022.11_36372;NC_000022.11_36437;…
USP53	NONHSAT215932	0.462185	5.48887e-48	32	hsa-miR-934;hsa-miR-498;NC_000023.11_36905;NC_000007.14_17821;NC_000021.9_35751;NC_000012.12_25887;NC_000011.10_25384;NC_000005.10_11919>NC_000005.10_11920;NC_000006.12_15769;hsa-miR-17-5p;NC_000013.11_27627;hsa-miR-26a-1-3p;hsa-miR-1257;NC_000002.12_3238;NC_000008.11_20037*;NC_000003.12_7973;NC_000011.10_25091;hsa-miR-519a-3p;NC_000015.10_30316;hsa-miR-15b-3p;NC_000012.12_26414;NT_187601.1_39493…
ASPH	NR_034072	0.603175	5.58856e-48	32	hsa-miR-934;hsa-miR-372-5p;hsa-miR-30c-1-3p;hsa-miR-7974;hsa-miR-3662;NC_000012.12_25887;NC_000004.12_10500;NC_000006.12_15769;hsa-miR-17-5p;NC_000006.12_15809;NC_000013.11_27627;hsa-miR-26a-1-3p;hsa-miR-7-5p;NC_000002.12_3238;NC_000012.12_25503;NC_000011.10_25091;hsa-miR-512-3p;hsa-miR-345-5p;hsa-miR-3529-3p;hsa-miR-515-5p;NC_000003.12_7520;hsa-miR-526b-5p;hsa-miR-296-3p;NT_187601.1_39493>NC_000…
TMEM156	NR_033268	0.40367	5.9602e-48	36	hsa-miR-372-5p;hsa-miR-3155a;NC_000013.11_28441;NC_000009.12_20733;hsa-miR-30c-1-3p;NC_000023.11_36905;hsa-miR-371b-3p;hsa-miR-7974;hsa-miR-629-3p;NC_000003.12_7276;hsa-miR-510-5p;NC_000007.14_17821;NC_000021.9_35751;hsa-miR-1298-5p;hsa-miR-18a-3p;NC_000012.12_25887;NC_000012.12_26286;hsa-miR-17-5p;NC_000006.12_15769;NC_000005.10_14158;NC_000001.11_3101;NC_000002.12_3238;hsa-miR-520a-3p;NC_000023…
LCOR	ENST00000237264	0.623529	6.09017e-48	35	NC_000008.11_19445;NC_000005.10_12588;hsa-miR-7974;hsa-miR-518e-5p>hsa-miR-519a-5p>hsa-miR-519b-5p>hsa-miR-519c-5p>hsa-miR-522-5p>hsa-miR-523-5p;hsa-miR-1298-5p;hsa-miR-27b-5p;NC_000021.9_35751;NC_000012.12_25887;NC_000011.10_25384;NC_000004.12_9892;hsa-miR-302c-5p;NC_000006.12_15769;hsa-miR-34c-5p;NC_000013.11_27627;NC_000022.11_36372;hsa-miR-26a-1-3p;hsa-miR-1257;hsa-miR-7-5p;NC_000001.11_3101;…
OSTM1	ENST00000281092	0.345	6.20755e-48	34	NC_000008.11_19445;NC_000005.10_12588;hsa-miR-92a-1-5p;hsa-miR-629-3p;NC_000012.12_25887;NC_000011.10_25384;NC_000004.12_9892;NC_000006.12_15769;hsa-miR-17-5p;NC_000013.11_27627;hsa-miR-7-5p;NC_000001.11_3101;NC_000002.12_3238;NC_000008.11_20037*;hsa-miR-15b-3p;hsa-miR-345-5p;hsa-miR-3529-3p;hsa-miR-515-5p;NC_000012.12_26414;NC_000018.10_33037;hsa-miR-548d-3p;NC_000012.12_26721;NT_187601.1_39493>…
ANK2	ENST00000563635	0.72973	6.33112e-48	38	hsa-miR-33b-3p;NC_000006.12_14671;hsa-miR-372-5p;hsa-miR-3155a;NC_000013.11_28441;NC_000008.11_19445;hsa-miR-518e-5p>hsa-miR-519a-5p>hsa-miR-519b-5p>hsa-miR-519c-5p>hsa-miR-522-5p>hsa-miR-523-5p;NC_000003.12_7276;hsa-miR-3662;NC_000007.14_17821;NC_000021.9_35751;NC_000003.12_8583;NC_000012.12_25887;NC_000011.10_25384;hsa-miR-302c-5p;NC_000006.12_15769;hsa-miR-17-5p;NC_000022.11_36372;NC_000022.11…
VTI1A	lnc-POTED-16:1	0.857143	6.36333e-48	34	hsa-miR-1323;hsa-miR-372-5p;NC_000013.11_28441;NC_000008.11_19445;NC_000010.11_23303;hsa-miR-92a-1-5p;hsa-miR-3662;NC_000007.14_17821;NC_000012.12_25887;NC_000011.10_25384;NC_000004.12_9892;NC_000012.12_26286;NC_000006.12_15769;hsa-miR-17-5p;hsa-miR-1257;hsa-miR-7-5p;NC_000012.12_25503;hsa-miR-519a-3p;hsa-miR-15b-3p;hsa-miR-302b-5p;hsa-miR-3529-3p;NC_000020.11_35116;NC_000003.12_7520;NC_000018.10…
VTI1A	lnc-ITGA1-1:1	0.821429	6.36333e-48	34	NC_000013.11_28441;hsa-miR-30c-1-3p;NC_000005.10_12140;NC_000008.11_19445;NC_000023.11_36905;NC_000005.10_12588;NC_000003.12_8135;hsa-miR-92a-1-5p;hsa-miR-7974;hsa-miR-629-3p;hsa-miR-3662;NC_000021.9_35751;NC_000012.12_25887;NC_000004.12_10500;NC_000011.10_25384;NC_000005.10_11919>NC_000005.10_11920;NC_000004.12_9892;NC_000012.12_26286;NC_000006.12_15769;hsa-miR-34c-5p;NC_000022.11_36437;hsa-miR-…
MAP2	lnc-CXorf64-5:1	0.853659	6.93213e-48	31	hsa-miR-33b-3p;hsa-miR-30c-1-3p;hsa-miR-498;NC_000023.11_36905;hsa-miR-371b-3p;hsa-miR-629-3p;NC_000010.11_23646;NC_000021.9_35751;NC_000004.12_10500;NC_000011.10_25384;hsa-miR-302c-5p;NC_000013.11_27627;NC_000022.11_36437;hsa-miR-7-5p;NC_000003.12_9133;NC_000018.10_33480;hsa-miR-519a-3p;hsa-miR-15b-3p;NC_000003.12_7520;NC_000018.10_33037;hsa-let-7c-5p;hsa-miR-526b-5p;hsa-miR-296-3p;NT_187601.1_3…
KIAA1033	ENST00000261530	0.280612	7.35977e-48	33	NC_000001.11_2008;hsa-miR-33b-3p;hsa-miR-372-5p;NC_000008.11_19445;NC_000010.11_23303;hsa-miR-629-3p;NC_000007.14_17821;NC_000012.12_25887;NC_000018.10_33742;NC_000004.12_9892;hsa-miR-17-5p;hsa-miR-34c-5p;hsa-miR-26a-1-3p;hsa-miR-7-5p;hsa-miR-519a-3p;NC_000015.10_30316;hsa-miR-3529-3p;hsa-miR-515-5p;NC_000003.12_7520;hsa-miR-517a-3p>hsa-miR-517b-3p;NC_000018.10_33037;hsa-miR-548d-3p;hsa-miR-296-3…
RHBDD1	ENST00000263967	0.376712	8.13041e-48	36	NC_000013.11_28441;hsa-miR-30c-1-3p;hsa-miR-92a-1-5p;hsa-miR-7974;hsa-miR-629-3p;hsa-miR-3662;NC_000007.14_17821;NC_000011.10_25384;NC_000018.10_33742;hsa-miR-302c-5p;NC_000006.12_15769;NC_000013.11_27627;NC_000022.11_36437;hsa-miR-26a-1-3p;hsa-miR-1257;hsa-miR-7-5p;NC_000002.12_3238;NC_000015.10_30316;hsa-miR-15b-3p;hsa-miR-302b-5p;NC_000016.10_31157;NC_000012.12_26414;NC_000018.10_33037;hsa-let…
GNE	ENST00000263967	0.356164	8.13041e-48	36	hsa-miR-934;NC_000013.11_28441;hsa-miR-30c-1-3p;hsa-miR-92a-1-5p;hsa-miR-629-3p;hsa-miR-3662;NC_000007.14_17821;NC_000010.11_23646;NC_000012.12_25887;NC_000018.10_33742;NC_000005.10_11919>NC_000005.10_11920;NC_000009.12_21255;hsa-miR-302c-5p;NC_000006.12_15769;hsa-miR-17-5p;NC_000013.11_27627;hsa-miR-1257;NC_000022.11_36437;NC_000002.12_3238;NC_000011.10_25091;NC_000015.10_30316;hsa-miR-15b-3p;hs…
ARHGAP5	lnc-POTED-16:1	0.587302	8.17654e-48	30	hsa-miR-1323;hsa-miR-372-5p;NC_000008.11_19445;NC_000007.14_17821;hsa-miR-27b-5p;NC_000012.12_25887;NC_000011.10_25384;NC_000004.12_9892;NC_000006.12_15769;hsa-miR-17-5p;hsa-miR-1257;NC_000011.10_25091;hsa-miR-519a-3p;hsa-miR-15b-3p;hsa-miR-3529-3p;hsa-miR-515-5p;NC_000020.11_35116;NC_000003.12_7520;NC_000018.10_33037;hsa-miR-548d-3p;hsa-miR-302b-3p;hsa-miR-20a-5p;hsa-miR-3143;hsa-miR-582-5p;hsa-…
EPRS	NONHSAT215932	0.386555	8.82908e-48	31	hsa-miR-372-5p;NC_000013.11_28441;hsa-miR-498;hsa-miR-92a-1-5p;NC_000007.14_17821;NC_000010.11_23646;NC_000011.10_25384;NC_000005.10_11919>NC_000005.10_11920;NC_000012.12_26286;hsa-miR-17-5p;hsa-miR-34c-5p;NC_000013.11_27627;hsa-miR-26a-1-3p;NC_000002.12_3238;NC_000008.11_20037*;NC_000011.10_25091;hsa-miR-519a-3p;NC_000015.10_30316;NC_000003.12_7520;NC_000012.12_26414;hsa-miR-296-3p;NT_187601.1_3…
MEF2A	NONHSAT224112	0.6	9.00169e-48	36	hsa-miR-371a-5p;hsa-miR-372-5p;NC_000013.11_28441;NC_000008.11_19445;hsa-miR-498;hsa-miR-92a-1-5p;hsa-miR-629-3p;hsa-miR-3662;NC_000007.14_17821;NC_000003.12_8583;NC_000012.12_25887;hsa-miR-18a-3p;NC_000006.12_15769;NC_000013.11_27627;NC_000022.11_36372;NC_000022.11_36437;hsa-miR-26a-1-3p;hsa-miR-7-5p;NC_000003.12_9133;hsa-miR-512-3p;NC_000020.11_35116;NC_000018.10_33037;hsa-miR-1284;NC_000018.10…
NCOA7	ENST00000563635	0.567568	9.44972e-48	35	hsa-miR-934;NC_000006.12_14671;hsa-miR-372-5p;NC_000013.11_28441;NC_000008.11_19445;hsa-miR-498;hsa-miR-518e-5p>hsa-miR-519a-5p>hsa-miR-519b-5p>hsa-miR-519c-5p>hsa-miR-522-5p>hsa-miR-523-5p;hsa-miR-3662;hsa-miR-302a-5p;NC_000012.12_25887;hsa-miR-18a-3p;NC_000011.10_25384;NC_000004.12_9892;hsa-miR-302c-5p;NC_000006.12_15769;hsa-miR-17-5p;NC_000022.11_36372;NC_000022.11_36437;hsa-miR-26a-1-3p;NC_00…
FRAS1	ENST00000261530	0.346939	9.73157e-48	38	hsa-miR-934;hsa-miR-25-5p;hsa-miR-372-5p;NC_000013.11_28441;NC_000023.11_36905;NC_000010.11_23303;hsa-miR-371b-3p;hsa-miR-92a-1-5p;NC_000003.12_7276;NC_000007.14_17821;hsa-miR-27b-5p;hsa-miR-1298-5p;NC_000010.11_23646;NC_000021.9_35751;NC_000011.10_25384;NC_000005.10_11919>NC_000005.10_11920;hsa-miR-34c-5p;NC_000013.11_27627;NC_000022.11_36437;hsa-miR-1257;hsa-miR-7-5p;NC_000001.11_3101;NC_000002…
RBAK	ENST00000263967	0.39726	1.00393e-47	34	hsa-miR-934;hsa-miR-372-5p;hsa-miR-30c-1-3p;hsa-miR-371b-3p;hsa-miR-92a-1-5p;hsa-miR-629-3p;hsa-miR-3662;NC_000007.14_17821;NC_000010.11_23646;NC_000004.12_10500;NC_000011.10_25384;NC_000009.12_21255;hsa-miR-1257;NC_000022.11_36437;hsa-miR-7-5p;NC_000002.12_3238;NC_000011.10_25091;hsa-miR-15b-3p;hsa-miR-302b-5p;NC_000003.12_7520;NC_000016.10_31157;NC_000012.12_26414;NT_187601.1_39493>NC_000014.9_…
KLHL5	ENST00000261530	0.387755	1.01472e-47	37	hsa-miR-934;NC_000006.12_14671;hsa-miR-372-5p;NC_000013.11_28441;hsa-miR-30c-1-3p;NC_000023.11_36905;hsa-miR-629-3p;NC_000003.12_7276;hsa-miR-1298-5p;NC_000010.11_23646;NC_000021.9_35751;NC_000012.12_25887;NC_000011.10_25384;NC_000018.10_33742;hsa-miR-302c-5p;hsa-miR-17-5p;NC_000022.11_36437;NC_000005.10_14158;hsa-miR-7-5p;NC_000001.11_3101;NC_000002.12_3238;NC_000003.12_7973;hsa-miR-3529-3p;NC_0…
MGEA5	NONHSAT224112	0.533333	1.09364e-47	35	hsa-miR-371a-5p;hsa-miR-372-5p;hsa-miR-3155a;NC_000013.11_28441;hsa-miR-92a-1-5p;hsa-miR-629-3p;hsa-miR-3662;NC_000007.14_17821;NC_000003.12_8583;NC_000012.12_25887;hsa-miR-18a-3p;NC_000004.12_10500;NC_000006.12_15769;hsa-miR-26a-1-3p;NC_000022.11_36437;hsa-miR-7-5p;NC_000003.12_9133;NC_000023.11_38289;hsa-miR-512-3p;hsa-miR-92a-3p;NC_000007.14_16719;NC_000009.12_21957;NC_000018.10_33037;hsa-let-…
ABCC4	NONHSAT224112	0.573333	1.09364e-47	35	hsa-miR-372-5p;hsa-miR-3155a;NC_000008.11_19445;NC_000010.11_23303;hsa-miR-92a-1-5p;hsa-miR-629-3p;hsa-miR-3662;NC_000007.14_17821;NC_000003.12_8583;NC_000012.12_25887;hsa-miR-18a-3p;NC_000006.12_15769;NC_000013.11_27627;NC_000022.11_36372;NC_000003.12_9133;hsa-miR-512-3p;NC_000020.11_35116;NC_000007.14_16719;NC_000016.10_31157;NC_000018.10_33037;NC_000018.10_33504*;NT_187601.1_39493>NC_000014.9_…
CPEB4	NR_033268	0.449541	1.11828e-47	37	hsa-miR-372-5p;hsa-miR-3155a;hsa-miR-30c-1-3p;NC_000010.11_23303;hsa-miR-92a-1-5p;hsa-miR-518b;hsa-miR-7974;hsa-miR-629-3p;NC_000003.12_7276;NC_000007.14_17821;hsa-miR-1298-5p;NC_000010.11_23646;NC_000012.12_25887;hsa-miR-302c-5p;NC_000012.12_26286;NC_000006.12_15769;hsa-miR-26a-1-3p;NC_000002.12_3238;NC_000003.12_9133;NC_000011.10_25091;hsa-miR-512-3p;hsa-miR-302b-5p;hsa-miR-345-5p;NC_000020.11_…
ZMYM6	ENST00000237264	0.482353	1.27409e-47	34	NC_000006.12_14671;NC_000013.11_28441;NC_000005.10_12140;NC_000008.11_19445;hsa-miR-92a-1-5p;hsa-miR-7974;hsa-miR-518e-5p>hsa-miR-519a-5p>hsa-miR-519b-5p>hsa-miR-519c-5p>hsa-miR-522-5p>hsa-miR-523-5p;hsa-miR-3662;NC_000021.9_35751;NC_000011.10_25384;NC_000004.12_9892;hsa-miR-302c-5p;NC_000022.11_36372;NC_000022.11_36437;hsa-miR-26a-1-3p;hsa-miR-7-5p;NC_000001.11_3101;NC_000002.12_3238;NC_000003.1…
MAP3K2	NONHSAT217150	0.769231	1.33901e-47	33	hsa-miR-934;hsa-miR-33b-3p;hsa-miR-371a-5p;hsa-miR-372-5p;hsa-miR-3155a;NC_000013.11_28441;hsa-miR-30c-1-3p;hsa-miR-498;NC_000010.11_23303;hsa-miR-371b-3p;hsa-miR-629-3p;hsa-miR-3662;NC_000004.12_10500;NC_000011.10_25384;hsa-miR-17-5p;NC_000022.11_36372;hsa-miR-1257;NC_000001.11_3101;NC_000002.12_3238;NC_000003.12_9133;hsa-miR-520a-3p;NC_000011.10_25091;NC_000015.10_30316;hsa-miR-15b-3p;hsa-miR-5…
MAP2	NONHSAT205276	0.694915	1.37979e-47	33	hsa-miR-372-5p;NC_000013.11_28441;NC_000023.11_36905;hsa-miR-7974;hsa-miR-518e-5p>hsa-miR-519a-5p>hsa-miR-519b-5p>hsa-miR-519c-5p>hsa-miR-522-5p>hsa-miR-523-5p;NC_000003.12_7276;hsa-miR-3662;hsa-miR-510-5p;NC_000007.14_17821;NC_000021.9_35751;hsa-miR-302a-5p;NC_000011.10_25384;NC_000012.12_26286;NC_000006.12_15769;hsa-miR-34c-5p;NC_000013.11_27627;hsa-miR-1257;NC_000002.12_3238;NC_000003.12_9133;…
MAP2	lnc-LY86-6:2	0.609375	1.37979e-47	33	hsa-miR-33b-3p;hsa-miR-372-5p;hsa-miR-371b-3p;NC_000010.11_23303;hsa-miR-7974;hsa-miR-518e-5p>hsa-miR-519a-5p>hsa-miR-519b-5p>hsa-miR-519c-5p>hsa-miR-522-5p>hsa-miR-523-5p;NC_000003.12_7276;hsa-miR-3662;hsa-miR-510-5p;NC_000007.14_17821;NC_000003.12_8583;hsa-miR-27b-5p;NC_000010.11_23646;NC_000011.10_25384;NC_000005.10_11919>NC_000005.10_11920;NC_000012.12_26286;NC_000006.12_15769;hsa-miR-34c-5p;…
ASB7	ENST00000261530	0.239796	1.39702e-47	32	hsa-miR-934;hsa-miR-372-5p;hsa-miR-30c-1-3p;NC_000008.11_19445;NC_000023.11_36905;NC_000010.11_23303;hsa-miR-498;hsa-miR-629-3p;NC_000007.14_17821;NC_000012.12_25887;NC_000021.9_35751;NC_000004.12_9892;hsa-miR-17-5p;hsa-miR-7-5p;NC_000003.12_7973;hsa-miR-519a-3p;hsa-miR-345-5p;hsa-miR-3529-3p;hsa-miR-515-5p;NC_000003.12_7520;NC_000018.10_33037;hsa-miR-548d-3p;NT_187601.1_39493>NC_000014.9_29213;h…
CHAC1	NR_033268	0.376147	1.52974e-47	35	NC_000009.12_21574;hsa-miR-3155a;hsa-miR-30c-1-3p;NC_000010.11_23303;hsa-miR-92a-1-5p;hsa-miR-7974;hsa-miR-518e-5p>hsa-miR-519a-5p>hsa-miR-519b-5p>hsa-miR-519c-5p>hsa-miR-522-5p>hsa-miR-523-5p;NC_000003.12_7276;NC_000007.14_17821;hsa-miR-510-5p;hsa-miR-1298-5p;NC_000021.9_35751;hsa-miR-302a-5p;hsa-miR-18a-3p;NC_000012.12_25887;hsa-miR-629-3p;NC_000012.12_26286;NC_000006.12_15769;hsa-miR-17-5p;NC_…
ANK2	lnc-C6orf228-2:1	0.849057	1.54775e-47	34	NC_000006.12_14671;hsa-miR-372-5p;NC_000013.11_28441;hsa-miR-371b-3p;hsa-miR-518e-5p>hsa-miR-519a-5p>hsa-miR-519b-5p>hsa-miR-519c-5p>hsa-miR-522-5p>hsa-miR-523-5p;hsa-miR-629-3p;NC_000012.12_25887;NC_000003.12_8583;NC_000006.12_15769;hsa-miR-17-5p;hsa-miR-34c-5p;NC_000003.12_9133;NC_000003.12_7973;NC_000018.10_33480;NC_000015.10_30316;hsa-miR-512-3p;hsa-miR-302b-5p;NC_000007.14_16719;NC_000016.10…
SLCO4A1	NR_033268	0.422018	1.55321e-47	36	hsa-miR-371a-5p;hsa-miR-3155a;NC_000009.12_20733;hsa-miR-30c-1-3p;NC_000023.11_36905;hsa-miR-371b-3p;hsa-miR-92a-1-5p;hsa-miR-7974;hsa-miR-518e-5p>hsa-miR-519a-5p>hsa-miR-519b-5p>hsa-miR-519c-5p>hsa-miR-522-5p>hsa-miR-523-5p;NC_000003.12_7276;hsa-miR-629-3p;hsa-miR-510-5p;NC_000021.9_35751;NC_000003.12_8583;hsa-miR-18a-3p;NC_000012.12_26286;hsa-miR-17-5p;NC_000022.11_36372;NC_000005.10_14158;hsa-…
CPEB4	lnc-POTED-16:1	0.761905	1.6499e-47	31	hsa-miR-1323;hsa-miR-372-5p;NC_000008.11_19445;NC_000010.11_23303;hsa-miR-92a-1-5p;hsa-miR-3662;NC_000007.14_17821;hsa-miR-27b-5p;NC_000012.12_25887;NC_000011.10_25384;NC_000012.12_26286;NC_000006.12_15769;hsa-miR-1257;NC_000012.12_25503;NC_000011.10_25091;hsa-miR-519a-3p;hsa-miR-15b-3p;hsa-miR-302b-5p;NC_000020.11_35116;NC_000018.10_33037;hsa-miR-548d-3p;hsa-miR-302b-3p;hsa-miR-20a-5p;hsa-miR-31…
GALNT5	lnc-C6orf228-2:1	0.830189	1.71068e-47	33	NC_000006.12_14671;hsa-miR-372-5p;NC_000013.11_28441;hsa-miR-371b-3p;hsa-miR-518e-5p>hsa-miR-519a-5p>hsa-miR-519b-5p>hsa-miR-519c-5p>hsa-miR-522-5p>hsa-miR-523-5p;hsa-miR-629-3p;NC_000012.12_25887;NC_000003.12_8583;hsa-miR-18a-3p;NC_000006.12_15769;hsa-miR-17-5p;hsa-miR-34c-5p;NC_000003.12_9133;NC_000003.12_7973;NC_000018.10_33480;NC_000015.10_30316;hsa-miR-512-3p;hsa-miR-302b-5p;NC_000016.10_311…
PDLIM5	ENST00000263967	0.363014	1.71724e-47	35	hsa-miR-372-5p;hsa-miR-92a-1-5p;hsa-miR-7974;hsa-miR-629-3p;hsa-miR-3662;NC_000007.14_17821;NC_000010.11_23646;NC_000012.12_25887;NC_000004.12_10500;NC_000011.10_25384;NC_000009.12_21255;hsa-miR-302c-5p;NC_000006.12_15769;hsa-miR-17-5p;NC_000013.11_27627;hsa-miR-26a-1-3p;hsa-miR-1257;NC_000002.12_3238;NC_000011.10_25091;hsa-miR-519a-3p;NC_000015.10_30316;NC_000003.12_7520;NC_000018.10_33037;hsa-l…
SLC38A2	NR_038921	0.47	1.78698e-47	32	NC_000013.11_28441;NC_000008.11_19445;hsa-miR-7974;hsa-miR-3662;hsa-miR-27b-5p;NC_000021.9_35751;NC_000012.12_25887;NC_000011.10_25384;NC_000004.12_9892;hsa-miR-302c-5p;NC_000012.12_26286;NC_000006.12_15769;NC_000006.12_15809;NC_000013.11_27627;NC_000022.11_36372;hsa-miR-26a-1-3p;NC_000001.11_3101;NC_000002.12_3238;NC_000015.10_30316;NC_000018.10_33037;hsa-miR-548d-3p;hsa-miR-302b-3p;hsa-miR-3143…
PLEKHH2	NONHSAT215932	0.445378	1.78698e-47	32	hsa-miR-33b-3p;hsa-miR-372-5p;hsa-miR-30c-1-3p;NC_000023.11_36905;NC_000012.12_25887;NC_000021.9_35751;NC_000011.10_25384;NC_000005.10_11919>NC_000005.10_11920;NC_000012.12_26286;NC_000006.12_15769;hsa-miR-17-5p;hsa-miR-1257;NC_000003.12_7973;NC_000011.10_25091;hsa-miR-519a-3p;NC_000015.10_30316;hsa-miR-15b-3p;NC_000003.12_7520;NC_000012.12_26414;NT_187601.1_39493>NC_000014.9_29213;hsa-miR-20a-5p…
PLEKHH2	NR_038921	0.5	1.78698e-47	32	NC_000001.11_2008;hsa-miR-372-5p;hsa-miR-30c-1-3p;NC_000008.11_19445;NC_000012.12_25887;NC_000021.9_35751;NC_000011.10_25384;NC_000005.10_11919>NC_000005.10_11920;NC_000004.12_9892;NC_000009.12_21255;NC_000012.12_26286;NC_000006.12_15769;hsa-miR-17-5p;NC_000022.11_36372;hsa-miR-1257;NC_000003.12_7973;NC_000015.10_30316;hsa-miR-515-5p;NC_000018.10_33037;hsa-miR-302b-3p;NT_187601.1_39493>NC_000014.…
OSTM1	NR_038921	0.54	1.78698e-47	32	NC_000013.11_28441;NC_000008.11_19445;NC_000005.10_12588;hsa-miR-3662;NC_000007.14_17821;NC_000012.12_25887;NC_000011.10_25384;NC_000004.12_9892;NC_000009.12_21255;NC_000006.12_15769;hsa-miR-17-5p;NC_000013.11_27627;NC_000001.11_3101;NC_000002.12_3238;NC_000015.10_30316;hsa-miR-512-3p;hsa-miR-515-5p;NC_000018.10_33037;hsa-miR-548d-3p;hsa-miR-526b-5p;NT_187601.1_39493>NC_000014.9_29213;hsa-miR-20a…
CPEB2	ENST00000563635	0.567568	1.85291e-47	35	hsa-miR-934;hsa-miR-33b-3p;NC_000006.12_14671;NC_000013.11_28441;hsa-miR-3155a;NC_000008.11_19445;hsa-miR-498;NC_000005.10_12588;hsa-miR-518e-5p>hsa-miR-519a-5p>hsa-miR-519b-5p>hsa-miR-519c-5p>hsa-miR-522-5p>hsa-miR-523-5p;hsa-miR-3662;NC_000007.14_17821;hsa-miR-302a-5p;NC_000003.12_8583;hsa-miR-18a-3p;NC_000011.10_25384;NC_000004.12_9892;hsa-miR-302c-5p;hsa-miR-17-5p;NC_000022.11_36372;NC_000022…
MAP2	ENST00000563635	0.621622	1.91147e-47	36	hsa-miR-33b-3p;hsa-miR-372-5p;hsa-miR-3155a;NC_000013.11_28441;NC_000008.11_19445;hsa-miR-498;hsa-miR-518e-5p>hsa-miR-519a-5p>hsa-miR-519b-5p>hsa-miR-519c-5p>hsa-miR-522-5p>hsa-miR-523-5p;NC_000003.12_7276;hsa-miR-3662;NC_000007.14_17821;hsa-miR-302a-5p;NC_000021.9_35751;NC_000003.12_8583;NC_000012.12_25887;NC_000011.10_25384;hsa-miR-302c-5p;NC_000006.12_15769;hsa-miR-17-5p;NC_000022.11_36437;hsa…
TNFSF15	NONHSAT215932	0.487395	2.08428e-47	36	hsa-miR-934;hsa-miR-372-5p;NC_000013.11_28441;hsa-miR-30c-1-3p;NC_000023.11_36905;NC_000010.11_23303;hsa-miR-92a-1-5p;hsa-miR-7974;NC_000010.11_23646;NC_000011.10_25384;hsa-miR-302c-5p;NC_000012.12_26286;NC_000006.12_15769;hsa-miR-17-5p;hsa-miR-34c-5p;NC_000005.10_14158;hsa-miR-1257;hsa-miR-26a-1-3p;NC_000002.12_3238;NC_000003.12_7973;hsa-miR-15b-3p;NC_000003.12_7520;NC_000016.10_31157;NC_000012.…
ANK2	NR_003587	0.712766	2.15302e-47	35	NC_000009.12_21574;hsa-miR-3155a;NC_000005.10_12140;NC_000023.11_36905;NC_000010.11_23303;hsa-miR-371b-3p;hsa-miR-92a-1-5p;hsa-miR-7974;NC_000007.14_17821;hsa-miR-510-5p;hsa-miR-1298-5p;NC_000003.12_8583;NC_000010.11_23646;NC_000021.9_35751;NC_000004.12_10500;NC_000005.10_11919>NC_000005.10_11920;NC_000006.12_15769;hsa-miR-34c-5p;NC_000005.10_14158;hsa-miR-7-5p;NC_000002.12_3238;NC_000015.10_3031…
PDP1	ENST00000281092	0.21	2.21426e-47	34	hsa-miR-934;NC_000006.12_14671;hsa-miR-372-5p;NC_000008.11_19445;NC_000010.11_23303;hsa-miR-371b-3p;NC_000005.10_12588;hsa-miR-629-3p;hsa-miR-1298-5p;NC_000021.9_35751;hsa-miR-18a-3p;NC_000011.10_25384;NC_000004.12_9892;hsa-miR-302c-5p;NC_000012.12_26286;NC_000006.12_15769;hsa-miR-26a-1-3p;hsa-miR-1257;hsa-miR-7-5p;NC_000002.12_3238;NC_000012.12_25503;NC_000011.10_25091;hsa-miR-3529-3p;hsa-miR-51…
HIPK2	NONHSAT165427	0.791045	2.21525e-47	36	hsa-miR-934;hsa-miR-372-5p;hsa-miR-3155a;NC_000013.11_28441;NC_000005.10_12140;NC_000023.11_36905;hsa-miR-371b-3p;hsa-miR-7974;hsa-miR-518e-5p>hsa-miR-519a-5p>hsa-miR-519b-5p>hsa-miR-519c-5p>hsa-miR-522-5p>hsa-miR-523-5p;hsa-miR-3662;hsa-miR-1298-5p;hsa-miR-302a-5p;NC_000010.11_23646;NC_000012.12_25887;NC_000011.10_25384;NC_000006.12_15769;hsa-miR-34c-5p;NC_000022.11_36437;NC_000005.10_14158;hsa-…
CREBRF	NR_034072	0.68254	2.32922e-47	32	hsa-miR-934;hsa-miR-1323;NC_000013.11_28441;hsa-miR-30c-1-3p;hsa-miR-7974;NC_000012.12_25887;NC_000011.10_25384;hsa-miR-302c-5p;NC_000006.12_15769;hsa-miR-17-5p;NC_000013.11_27627;hsa-miR-26a-1-3p;hsa-miR-7-5p;NC_000002.12_3238;NC_000012.12_25503;NC_000011.10_25091;hsa-miR-3529-3p;hsa-miR-515-5p;NC_000003.12_7520;NC_000012.12_26414;hsa-miR-526b-5p;hsa-miR-296-3p;NT_187601.1_39493>NC_000014.9_2921…
MLLT4	ENST00000432045	0.5	2.45113e-47	30	NC_000006.12_14671;hsa-miR-25-5p;hsa-miR-372-5p;hsa-miR-30c-1-3p;hsa-miR-498;NC_000008.11_19445;hsa-miR-629-3p;NC_000012.12_25887;hsa-miR-18a-3p;NC_000011.10_25384;NC_000006.12_15769;hsa-miR-34c-5p;hsa-miR-26a-1-3p;hsa-miR-7-5p;NC_000011.10_25091;hsa-miR-515-5p;NC_000003.12_7520;hsa-miR-548d-3p;NC_000012.12_26721;NT_187601.1_39493>NC_000014.9_29213;hsa-miR-302b-3p;hsa-miR-3143;hsa-miR-582-5p;hsa-…
SLC7A11	ENST00000263967	0.513699	2.68466e-47	37	hsa-miR-934;hsa-miR-372-5p;NC_000013.11_28441;hsa-miR-30c-1-3p;NC_000007.14_17821;hsa-miR-3662;NC_000010.11_23646;NC_000012.12_25887;NC_000004.12_10500;NC_000011.10_25384;NC_000018.10_33742;hsa-miR-302c-5p;NC_000006.12_15769;hsa-miR-17-5p;hsa-miR-26a-1-3p;hsa-miR-1257;hsa-miR-7-5p;NC_000002.12_3238;hsa-miR-15b-3p;hsa-miR-302b-5p;hsa-miR-345-5p;NC_000016.10_31157;NC_000012.12_26414;NC_000018.10_33…
LYST	lnc-POTED-16:1	0.857143	2.81213e-47	33	hsa-miR-1323;hsa-miR-372-5p;NC_000013.11_28441;NC_000008.11_19445;NC_000010.11_23303;hsa-miR-92a-1-5p;hsa-miR-3662;NC_000007.14_17821;hsa-miR-27b-5p;NC_000012.12_25887;NC_000011.10_25384;NC_000012.12_26286;NC_000006.12_15769;hsa-miR-17-5p;hsa-miR-7-5p;NC_000012.12_25503;hsa-miR-519a-3p;hsa-miR-15b-3p;hsa-miR-3529-3p;hsa-miR-515-5p;NC_000020.11_35116;NC_000003.12_7520;NC_000018.10_33037;hsa-miR-54…
RASGRP3	ENST00000263967	0.30137	2.83919e-47	33	hsa-miR-33b-3p;hsa-miR-372-5p;hsa-miR-498;NC_000007.14_17821;NC_000010.11_23646;NC_000012.12_25887;NC_000011.10_25384;NC_000018.10_33742;hsa-miR-302c-5p;NC_000006.12_15769;hsa-miR-17-5p;NC_000013.11_27627;hsa-miR-26a-1-3p;hsa-miR-1257;hsa-miR-7-5p;NC_000002.12_3238;hsa-miR-519a-3p;NC_000015.10_30316;hsa-miR-345-5p;NC_000003.12_7520;NC_000018.10_33037;NC_000012.12_26721;hsa-miR-296-3p;NT_187601.1_…
DMXL2	ENST00000263967	0.438356	2.83919e-47	33	hsa-miR-33b-3p;hsa-miR-372-5p;hsa-miR-30c-1-3p;hsa-miR-498;hsa-miR-7974;NC_000012.12_25887;NC_000011.10_25384;NC_000018.10_33742;NC_000005.10_11919>NC_000005.10_11920;hsa-miR-302c-5p;NC_000006.12_15769;hsa-miR-17-5p;NC_000013.11_27627;hsa-miR-26a-1-3p;hsa-miR-1257;NC_000011.10_25091;NC_000015.10_30316;hsa-miR-345-5p;NC_000020.11_35116;NC_000003.12_7520;NC_000018.10_33037;hsa-miR-296-3p;hsa-miR-30…
MTMR9	NR_033268	0.440367	2.93076e-47	38	hsa-miR-372-5p;NC_000013.11_28441;hsa-miR-30c-1-3p;NC_000023.11_36905;hsa-miR-7974;hsa-miR-518e-5p>hsa-miR-519a-5p>hsa-miR-519b-5p>hsa-miR-519c-5p>hsa-miR-522-5p>hsa-miR-523-5p;NC_000003.12_7276;hsa-miR-1298-5p;hsa-miR-510-5p;NC_000010.11_23646;NC_000021.9_35751;NC_000003.12_8583;NC_000012.12_25887;hsa-miR-302c-5p;NC_000012.12_26286;hsa-miR-17-5p;NC_000022.11_36372;NC_000005.10_14158;hsa-miR-26a-…
FRAS1	NONHSAT215932	0.462185	3.09596e-47	35	hsa-miR-934;hsa-miR-372-5p;NC_000013.11_28441;NC_000023.11_36905;NC_000010.11_23303;hsa-miR-92a-1-5p;hsa-miR-7974;NC_000007.14_17821;NC_000010.11_23646;NC_000021.9_35751;NC_000011.10_25384;NC_000005.10_11919>NC_000005.10_11920;NC_000012.12_26286;hsa-miR-34c-5p;NC_000013.11_27627;hsa-miR-1257;NC_000002.12_3238;NC_000003.12_9133;NC_000015.10_30316;hsa-miR-15b-3p;NC_000003.12_7520;NC_000009.12_21957…
AHNAK2	NONHSAT215932	0.420168	3.09596e-47	35	hsa-miR-934;hsa-miR-33b-3p;hsa-miR-372-5p;hsa-miR-30c-1-3p;NC_000023.11_36905;NC_000010.11_23303;hsa-miR-92a-1-5p;hsa-miR-7974;NC_000007.14_17821;NC_000010.11_23646;NC_000012.12_25887;NC_000011.10_25384;hsa-miR-302c-5p;NC_000006.12_15769;NC_000013.11_27627;NC_000005.10_14158;hsa-miR-1257;NC_000002.12_3238;NC_000003.12_9133;NC_000011.10_25091;hsa-miR-15b-3p;NC_000003.12_7520;NC_000020.11_35116;NC_…
TMEM156	NR_038921	0.44	3.13089e-47	34	hsa-miR-372-5p;NC_000013.11_28441;hsa-miR-30c-1-3p;hsa-miR-371b-3p;hsa-miR-7974;hsa-miR-3662;hsa-miR-27b-5p;NC_000007.14_17821;NC_000021.9_35751;hsa-miR-1298-5p;NC_000012.12_25887;NC_000011.10_25384;NC_000005.10_11919>NC_000005.10_11920;NC_000012.12_26286;NC_000006.12_15769;hsa-miR-17-5p;NC_000013.11_27627;hsa-miR-1257;NC_000001.11_3101;NC_000002.12_3238;NC_000015.10_30316;hsa-miR-512-3p;NC_00001…
CHD9	ENST00000237264	0.494118	3.13089e-47	34	NC_000001.11_2008;NC_000006.12_14671;NC_000005.10_12588;hsa-miR-92a-1-5p;hsa-miR-7974;hsa-miR-27b-5p;NC_000021.9_35751;NC_000012.12_25887;hsa-miR-18a-3p;NC_000011.10_25384;NC_000005.10_11919>NC_000005.10_11920;NC_000004.12_9892;hsa-miR-302c-5p;NC_000006.12_15769;NC_000013.11_27627;NC_000022.11_36372;hsa-miR-26a-1-3p;hsa-miR-1257;hsa-miR-7-5p;NC_000002.12_3238;NC_000003.12_7973;hsa-miR-519a-3p;NC_…
NIPAL2	NR_038921	0.47	3.33906e-47	31	NC_000001.11_2008;hsa-miR-25-5p;hsa-miR-372-5p;hsa-miR-30c-1-3p;NC_000008.11_19445;hsa-miR-518e-5p>hsa-miR-519a-5p>hsa-miR-519b-5p>hsa-miR-519c-5p>hsa-miR-522-5p>hsa-miR-523-5p;NC_000012.12_25887;NC_000011.10_25384;NC_000004.12_9892;NC_000009.12_21255;NC_000006.12_15769;NC_000013.11_27627;NC_000022.11_36372;hsa-miR-26a-1-3p;NC_000001.11_3101;NC_000003.12_7973;hsa-miR-515-5p;NC_000020.11_35116;NC_…
TMEM123	NR_038921	0.39	3.85079e-47	30	hsa-miR-1323;hsa-miR-372-5p;NC_000008.11_19445;hsa-miR-371b-3p;hsa-miR-7974;hsa-miR-3662;NC_000007.14_17821;NC_000012.12_25887;NC_000004.12_9892;hsa-miR-302c-5p;NC_000012.12_26286;NC_000006.12_15769;hsa-miR-17-5p;NC_000006.12_15809;hsa-miR-512-3p;hsa-miR-548d-3p;hsa-miR-526b-5p;hsa-miR-302b-3p;hsa-miR-20a-5p;NT_187601.1_39493>NC_000014.9_29213;NC_000009.12_21925;hsa-miR-3143;hsa-miR-520c-3p;hsa-m…
SLC38A1	XR_428151	0.767857	3.96668e-47	31	hsa-miR-934;hsa-miR-33b-3p;NC_000006.12_14671;hsa-miR-30c-1-3p;NC_000008.11_19445;NC_000011.10_25384;NC_000018.10_33742;NC_000004.12_9892;NC_000006.12_15769;hsa-miR-17-5p;hsa-miR-34c-5p;NC_000022.11_36372;hsa-miR-1257;NC_000002.12_3238;NC_000003.12_7973;NC_000011.10_25091;hsa-miR-519a-3p;NC_000015.10_30316;hsa-miR-3529-3p;hsa-miR-515-5p;hsa-miR-548d-3p;hsa-miR-296-3p;NT_187601.1_39493>NC_000014.9…
FBXO32	ENST00000263967	0.328767	4.08337e-47	35	hsa-miR-372-5p;hsa-miR-30c-1-3p;hsa-miR-371b-3p;hsa-miR-7974;hsa-miR-629-3p;hsa-miR-3662;NC_000007.14_17821;NC_000012.12_25887;NC_000011.10_25384;NC_000004.12_9892;hsa-miR-302c-5p;NC_000006.12_15769;hsa-miR-17-5p;NC_000013.11_27627;hsa-miR-26a-1-3p;hsa-miR-1257;hsa-miR-7-5p;NC_000015.10_30316;hsa-miR-15b-3p;NC_000020.11_35116;NC_000003.12_7520;NC_000016.10_31157;NC_000012.12_26414;NC_000018.10_33…
NCOA7	NONHSAT215932	0.495798	4.25803e-47	36	hsa-miR-934;hsa-miR-372-5p;NC_000013.11_28441;hsa-miR-30c-1-3p;hsa-miR-498;NC_000023.11_36905;NC_000010.11_23303;hsa-miR-92a-1-5p;hsa-miR-518e-5p>hsa-miR-519a-5p>hsa-miR-519b-5p>hsa-miR-519c-5p>hsa-miR-522-5p>hsa-miR-523-5p;NC_000010.11_23646;NC_000012.12_25887;NC_000011.10_25384;hsa-miR-302c-5p;NC_000012.12_26286;NC_000006.12_15769;hsa-miR-17-5p;NC_000013.11_27627;hsa-miR-26a-1-3p;NC_000002.12_3…
AUTS2	ENST00000237264	0.635294	4.44558e-47	38	hsa-miR-33b-3p;NC_000005.10_12140;hsa-miR-92a-1-5p;hsa-miR-7974;hsa-miR-518e-5p>hsa-miR-519a-5p>hsa-miR-519b-5p>hsa-miR-519c-5p>hsa-miR-522-5p>hsa-miR-523-5p;hsa-miR-3662;hsa-miR-510-5p;hsa-miR-1298-5p;NC_000021.9_35751;hsa-miR-27b-5p;hsa-miR-18a-3p;NC_000012.12_25887;NC_000011.10_25384;NC_000005.10_11919>NC_000005.10_11920;hsa-miR-302c-5p;NC_000006.12_15769;hsa-miR-34c-5p;NC_000013.11_27627;NC_0…
OCLN	ENST00000281092	0.28	4.51365e-47	35	hsa-miR-30c-1-3p;NC_000008.11_19445;NC_000005.10_12588;hsa-miR-92a-1-5p;hsa-miR-18a-3p;NC_000011.10_25384;hsa-miR-17-5p;hsa-miR-34c-5p;NC_000013.11_27627;NC_000005.10_14158;hsa-miR-26a-1-3p;hsa-miR-7-5p;NC_000008.11_20037*;NC_000003.12_7973;NC_000012.12_25503;hsa-miR-15b-3p;hsa-miR-3529-3p;hsa-miR-515-5p;NC_000003.12_7520;NC_000016.10_31157;hsa-miR-548d-3p;NT_187601.1_39493>NC_000014.9_29213;hsa-…
KDM7A	ENST00000568777	0.545455	4.62077e-47	34	hsa-miR-934;NC_000005.10_12588;hsa-miR-92a-1-5p;hsa-miR-629-3p;NC_000010.11_23646;NC_000012.12_25887;hsa-miR-18a-3p;NC_000018.10_33742;NC_000004.12_9892;hsa-miR-302c-5p;NC_000006.12_15769;hsa-miR-34c-5p;hsa-miR-26a-1-3p;hsa-miR-7-5p;NC_000002.12_3238;NC_000003.12_7973;NC_000012.12_25503;hsa-miR-512-3p;hsa-miR-345-5p;hsa-miR-515-5p;NC_000003.12_7520;hsa-miR-548d-3p;hsa-miR-526b-5p;hsa-miR-296-3p;N…
VTI1A	lnc-LY86-6:2	0.796875	4.85186e-47	34	hsa-miR-33b-3p;hsa-miR-25-5p;hsa-miR-372-5p;hsa-miR-371b-3p;NC_000010.11_23303;hsa-miR-92a-1-5p;hsa-miR-7974;hsa-miR-518e-5p>hsa-miR-519a-5p>hsa-miR-519b-5p>hsa-miR-519c-5p>hsa-miR-522-5p>hsa-miR-523-5p;hsa-miR-3662;NC_000007.14_17821;hsa-miR-510-5p;NC_000003.12_8583;NC_000010.11_23646;NC_000011.10_25384;NC_000005.10_11919>NC_000005.10_11920;NC_000012.12_26286;NC_000006.12_15769;hsa-miR-34c-5p;hs…
RPS6KA2	NONHSAT215932	0.352941	5.13738e-47	33	hsa-miR-372-5p;hsa-miR-30c-1-3p;NC_000023.11_36905;NC_000010.11_23303;hsa-miR-92a-1-5p;hsa-miR-7974;NC_000007.14_17821;NC_000021.9_35751;NC_000012.12_25887;NC_000005.10_11919>NC_000005.10_11920;hsa-miR-302c-5p;NC_000012.12_26286;NC_000006.12_15769;hsa-miR-17-5p;NC_000013.11_27627;hsa-miR-26a-1-3p;NC_000015.10_30316;NC_000003.12_7520;NC_000020.11_35116;NC_000012.12_26414;hsa-miR-296-3p;hsa-miR-302…
AUTS2	NONHSAT224112	0.626667	5.23777e-47	37	hsa-miR-371a-5p;hsa-miR-372-5p;hsa-miR-3155a;NC_000010.11_23303;hsa-miR-92a-1-5p;hsa-miR-3662;NC_000007.14_17821;NC_000003.12_8583;NC_000012.12_25887;hsa-miR-18a-3p;NC_000004.12_10500;NC_000006.12_15769;NC_000013.11_27627;hsa-miR-26a-1-3p;NC_000022.11_36437;hsa-miR-7-5p;NC_000003.12_9133;hsa-miR-520a-3p;hsa-miR-512-3p;hsa-miR-345-5p;hsa-miR-5585-3p;NC_000007.14_16719;NC_000009.12_21957;NC_000016.…
KLHL28	NONHSAT215932	0.495798	5.54797e-47	32	hsa-miR-934;hsa-miR-372-5p;hsa-miR-30c-1-3p;hsa-miR-498;NC_000023.11_36905;NC_000012.12_25887;NC_000021.9_35751;NC_000011.10_25384;hsa-miR-302c-5p;NC_000012.12_26286;hsa-miR-17-5p;hsa-miR-1257;NC_000002.12_3238;NC_000003.12_7973;NC_000015.10_30316;hsa-miR-15b-3p;NC_000003.12_7520;NC_000020.11_35116;NC_000016.10_31157;hsa-miR-296-3p;NT_187601.1_39493>NC_000014.9_29213;hsa-miR-20a-5p;hsa-miR-302b-3…
USP53	ENST00000263967	0.356164	6.00977e-47	32	hsa-miR-934;hsa-miR-498;NC_000007.14_17821;NC_000012.12_25887;NC_000011.10_25384;NC_000005.10_11919>NC_000005.10_11920;NC_000004.12_9892;NC_000006.12_15769;hsa-miR-17-5p;NC_000013.11_27627;hsa-miR-26a-1-3p;hsa-miR-1257;hsa-miR-7-5p;NC_000002.12_3238;NC_000011.10_25091;hsa-miR-519a-3p;NC_000015.10_30316;hsa-miR-15b-3p;NC_000012.12_26414;NC_000018.10_33037;NC_000012.12_26721;NT_187601.1_39493>NC_00…
MAP3K2	ENST00000568777	0.534091	6.84665e-47	35	hsa-miR-934;hsa-miR-33b-3p;hsa-miR-372-5p;NC_000013.11_28441;hsa-miR-30c-1-3p;hsa-miR-371b-3p;hsa-miR-92a-1-5p;NC_000003.12_7276;hsa-miR-629-3p;NC_000010.11_23646;NC_000003.12_8583;NC_000012.12_25887;NC_000018.10_33742;hsa-miR-302c-5p;NC_000006.12_15769;hsa-miR-34c-5p;hsa-miR-26a-1-3p;hsa-miR-7-5p;NC_000001.11_3101;NC_000002.12_3238;NC_000003.12_7973;NC_000011.10_25091;hsa-miR-512-3p;NC_000003.12…
TBC1D19	ENST00000263967	0.376712	6.96386e-47	34	hsa-miR-934;hsa-miR-372-5p;hsa-miR-30c-1-3p;hsa-miR-92a-1-5p;hsa-miR-629-3p;hsa-miR-3662;NC_000012.12_25887;NC_000004.12_10500;NC_000011.10_25384;NC_000018.10_33742;NC_000005.10_11919>NC_000005.10_11920;NC_000006.12_15769;hsa-miR-1257;NC_000022.11_36437;hsa-miR-7-5p;NC_000011.10_25091;NC_000015.10_30316;hsa-miR-15b-3p;hsa-miR-345-5p;NC_000020.11_35116;NC_000016.10_31157;NC_000012.12_26414;NC_0000…
HIPK3	XR_428151	0.642857	7.22611e-47	30	NC_000006.12_14671;hsa-miR-30c-1-3p;NC_000008.11_19445;hsa-miR-498;hsa-miR-18a-3p;NC_000011.10_25384;NC_000004.12_9892;NC_000006.12_15769;hsa-miR-17-5p;hsa-miR-34c-5p;NC_000022.11_36372;hsa-miR-1257;NC_000002.12_3238;NC_000003.12_7973;NC_000011.10_25091;hsa-miR-519a-3p;NC_000015.10_30316;hsa-miR-3529-3p;hsa-miR-515-5p;hsa-miR-548d-3p;NT_187601.1_39493>NC_000014.9_29213;hsa-miR-20a-5p;hsa-miR-302b…
SLC39A10	XR_428151	0.732143	7.27331e-47	31	hsa-miR-934;hsa-miR-33b-3p;NC_000006.12_14671;hsa-miR-30c-1-3p;NC_000008.11_19445;hsa-miR-498;NC_000010.11_23303;NC_000007.14_17821;NC_000011.10_25384;NC_000006.12_15769;hsa-miR-17-5p;hsa-miR-34c-5p;NC_000022.11_36372;NC_000002.12_3238;NC_000003.12_7973;NC_000011.10_25091;hsa-miR-519a-3p;NC_000015.10_30316;hsa-miR-515-5p;hsa-miR-517a-3p>hsa-miR-517b-3p;hsa-miR-548d-3p;NT_187601.1_39493>NC_000014.…
KLHL5	NONHSAT215932	0.563025	7.50246e-47	34	hsa-miR-934;hsa-miR-372-5p;NC_000013.11_28441;hsa-miR-30c-1-3p;NC_000023.11_36905;hsa-miR-518e-5p>hsa-miR-519a-5p>hsa-miR-519b-5p>hsa-miR-519c-5p>hsa-miR-522-5p>hsa-miR-523-5p;NC_000010.11_23646;NC_000021.9_35751;NC_000012.12_25887;NC_000011.10_25384;hsa-miR-302c-5p;NC_000006.12_15769;hsa-miR-17-5p;NC_000005.10_14158;NC_000002.12_3238;NC_000003.12_9133;NC_000003.12_7973;NC_000008.11_20037*;hsa-mi…
RNF14	ENST00000568777	0.477273	8.26759e-47	33	hsa-miR-934;hsa-miR-33b-3p;hsa-miR-372-5p;NC_000013.11_28441;hsa-miR-371b-3p;hsa-miR-675-5p;hsa-miR-92a-1-5p;hsa-miR-518e-5p>hsa-miR-519a-5p>hsa-miR-519b-5p>hsa-miR-519c-5p>hsa-miR-522-5p>hsa-miR-523-5p;NC_000003.12_7276;NC_000010.11_23646;NC_000003.12_8583;NC_000012.12_25887;NC_000018.10_33742;hsa-miR-302c-5p;NC_000006.12_15769;hsa-miR-34c-5p;hsa-miR-26a-1-3p;hsa-miR-7-5p;NC_000001.11_3101;NC_00…
HIPK3	ENST00000563635	0.540541	8.26759e-47	33	NC_000006.12_14671;hsa-miR-372-5p;hsa-miR-498;NC_000008.11_19445;NC_000005.10_12588;NC_000003.12_8135;hsa-miR-518e-5p>hsa-miR-519a-5p>hsa-miR-519b-5p>hsa-miR-519c-5p>hsa-miR-522-5p>hsa-miR-523-5p;NC_000021.9_35751;NC_000012.12_25887;hsa-miR-18a-3p;NC_000011.10_25384;NC_000004.12_9892;NC_000006.12_15769;hsa-miR-17-5p;NC_000022.11_36372;NC_000001.11_3101;NC_000012.12_25503;hsa-miR-519a-3p;NC_000015…
EPRS	ENST00000263967	0.294521	8.66125e-47	31	hsa-miR-372-5p;NC_000013.11_28441;hsa-miR-498;hsa-miR-92a-1-5p;NC_000007.14_17821;hsa-miR-3662;NC_000010.11_23646;NC_000011.10_25384;NC_000004.12_9892;NC_000005.10_11919>NC_000005.10_11920;hsa-miR-17-5p;NC_000013.11_27627;hsa-miR-26a-1-3p;NC_000002.12_3238;NC_000011.10_25091;hsa-miR-519a-3p;NC_000015.10_30316;NC_000003.12_7520;NC_000012.12_26414;NC_000018.10_33037;hsa-miR-296-3p;NT_187601.1_39493…
CLIC4	ENST00000263967	0.294521	8.66125e-47	31	hsa-miR-934;hsa-miR-30c-1-3p;hsa-miR-92a-1-5p;hsa-miR-3662;NC_000011.10_25384;NC_000018.10_33742;NC_000004.12_9892;hsa-miR-302c-5p;hsa-miR-17-5p;NC_000013.11_27627;NC_000022.11_36437;hsa-miR-1257;hsa-miR-26a-1-3p;hsa-miR-7-5p;hsa-miR-519a-3p;hsa-miR-15b-3p;hsa-miR-302b-5p;NC_000003.12_7520;hsa-miR-302b-3p;NT_187601.1_39493>NC_000014.9_29213;hsa-miR-20a-5p;NC_000007.14_17077;hsa-miR-582-5p;hsa-miR…
NCOA7	NONHSAT224112	0.626667	8.96811e-47	35	hsa-miR-371a-5p;hsa-miR-372-5p;NC_000013.11_28441;NC_000008.11_19445;hsa-miR-498;NC_000010.11_23303;hsa-miR-92a-1-5p;hsa-miR-629-3p;hsa-miR-3662;NC_000012.12_25887;hsa-miR-18a-3p;NC_000004.12_10500;NC_000006.12_15769;NC_000013.11_27627;NC_000022.11_36372;NC_000022.11_36437;hsa-miR-26a-1-3p;hsa-miR-7-5p;NC_000003.12_9133;hsa-miR-520a-3p;hsa-miR-512-3p;NC_000016.10_31157;NC_000018.10_33037;NC_00001…
C1orf116	ENST00000263967	0.287671	9.49184e-47	35	hsa-miR-934;hsa-miR-372-5p;NC_000013.11_28441;hsa-miR-30c-1-3p;hsa-miR-498;hsa-miR-92a-1-5p;hsa-miR-7974;hsa-miR-3662;NC_000007.14_17821;NC_000004.12_10500;NC_000011.10_25384;NC_000005.10_11919>NC_000005.10_11920;hsa-miR-26a-1-3p;NC_000002.12_3238;NC_000011.10_25091;NC_000015.10_30316;hsa-miR-345-5p;NC_000020.11_35116;NC_000003.12_7520;NC_000016.10_31157;NC_000018.10_33037;hsa-let-7c-5p;hsa-miR-2…
ATP2B4	NR_034072	0.68254	1.10678e-46	33	hsa-miR-934;hsa-miR-1323;hsa-miR-372-5p;NC_000013.11_28441;hsa-miR-30c-1-3p;hsa-miR-371b-3p;hsa-miR-7974;hsa-miR-3662;hsa-miR-510-5p;hsa-miR-302a-5p;NC_000012.12_25887;NC_000004.12_10500;NC_000011.10_25384;NC_000006.12_15769;hsa-miR-17-5p;NC_000013.11_27627;hsa-miR-26a-1-3p;hsa-miR-7-5p;NC_000002.12_3238;NC_000011.10_25091;hsa-miR-512-3p;hsa-miR-515-5p;NC_000003.12_7520;hsa-miR-526b-5p;hsa-miR-29…
PIK3CA	NR_034072	0.714286	1.10678e-46	33	hsa-miR-934;hsa-miR-372-5p;NC_000013.11_28441;hsa-miR-30c-1-3p;hsa-miR-371b-3p;hsa-miR-7974;hsa-miR-3662;hsa-miR-302a-5p;NC_000012.12_25887;NC_000004.12_10500;NC_000011.10_25384;hsa-miR-302c-5p;NC_000006.12_15769;hsa-miR-17-5p;NC_000013.11_27627;hsa-miR-26a-1-3p;hsa-miR-7-5p;NC_000002.12_3238;NC_000011.10_25091;hsa-miR-512-3p;hsa-miR-345-5p;NC_000003.12_7520;NC_000012.12_26414;hsa-miR-526b-5p;hsa…
DENND2C	ENST00000261530	0.27551	1.12646e-46	35	hsa-miR-934;hsa-miR-372-5p;NC_000013.11_28441;hsa-miR-30c-1-3p;NC_000010.11_23303;hsa-miR-92a-1-5p;NC_000003.12_7276;NC_000021.9_35751;NC_000012.12_25887;hsa-miR-17-5p;NC_000013.11_27627;hsa-miR-1257;NC_000022.11_36437;hsa-miR-7-5p;NC_000002.12_3238;hsa-miR-345-5p;hsa-miR-3529-3p;NC_000020.11_35116;NC_000003.12_7520;NC_000012.12_26414;NC_000018.10_33037;hsa-miR-296-3p;hsa-miR-302b-3p;hsa-miR-20a-…
PNPLA8	NR_033268	0.394495	1.16735e-46	35	hsa-miR-372-5p;hsa-miR-3155a;NC_000013.11_28441;hsa-miR-30c-1-3p;hsa-miR-371b-3p;hsa-miR-7974;hsa-miR-518e-5p>hsa-miR-519a-5p>hsa-miR-519b-5p>hsa-miR-519c-5p>hsa-miR-522-5p>hsa-miR-523-5p;NC_000010.11_23646;NC_000003.12_8583;NC_000021.9_35751;hsa-miR-302c-5p;hsa-miR-17-5p;NC_000022.11_36372;NC_000002.12_3238;NC_000003.12_9133;NC_000011.10_25091;hsa-miR-512-3p;hsa-miR-302b-5p;hsa-miR-345-5p;NC_000…
CTH	NR_033268	0.40367	1.16735e-46	35	NC_000013.11_28441;hsa-miR-30c-1-3p;NC_000023.11_36905;hsa-miR-371b-3p;NC_000010.11_23303;hsa-miR-92a-1-5p;hsa-miR-7974;hsa-miR-518e-5p>hsa-miR-519a-5p>hsa-miR-519b-5p>hsa-miR-519c-5p>hsa-miR-522-5p>hsa-miR-523-5p;hsa-miR-629-3p;NC_000003.12_7276;hsa-miR-510-5p;NC_000007.14_17821;NC_000021.9_35751;hsa-miR-1298-5p;hsa-miR-18a-3p;NC_000003.12_8583;hsa-miR-302c-5p;NC_000006.12_15769;hsa-miR-17-5p;NC…
ERRFI1	NONHSAT224112	0.546667	1.21124e-46	33	hsa-miR-372-5p;hsa-miR-3155a;NC_000008.11_19445;hsa-miR-498;hsa-miR-629-3p;hsa-miR-3662;NC_000007.14_17821;NC_000003.12_8583;NC_000012.12_25887;hsa-miR-18a-3p;NC_000006.12_15769;NC_000013.11_27627;NC_000022.11_36372;hsa-miR-26a-1-3p;hsa-miR-7-5p;NC_000003.12_9133;hsa-miR-520a-3p;hsa-miR-512-3p;hsa-miR-5585-3p;NC_000007.14_16719;hsa-let-7c-5p;NT_187601.1_39493>NC_000014.9_29213;hsa-miR-302b-3p;NC_…
LMO7	ENST00000563635	0.662162	1.29158e-46	35	hsa-miR-934;hsa-miR-33b-3p;NC_000006.12_14671;hsa-miR-3155a;NC_000013.11_28441;NC_000008.11_19445;NC_000003.12_7276;hsa-miR-3662;NC_000007.14_17821;hsa-miR-302a-5p;NC_000003.12_8583;NC_000012.12_25887;hsa-miR-18a-3p;NC_000011.10_25384;hsa-miR-302c-5p;NC_000006.12_15769;hsa-miR-17-5p;NC_000022.11_36372;NC_000022.11_36437;hsa-miR-26a-1-3p;NC_000001.11_3101;NC_000012.12_25503;hsa-miR-519a-3p;NC_0000…
DOPEY2	ENST00000261530	0.280612	1.30653e-46	38	hsa-miR-33b-3p;NC_000006.12_14671;hsa-miR-372-5p;hsa-miR-30c-1-3p;NC_000008.11_19445;NC_000023.11_36905;NC_000010.11_23303;hsa-miR-371b-3p;hsa-miR-92a-1-5p;NC_000007.14_17821;hsa-miR-27b-5p;hsa-miR-1298-5p;NC_000021.9_35751;NC_000010.11_23646;NC_000012.12_25887;NC_000005.10_11919>NC_000005.10_11920;hsa-miR-302c-5p;hsa-miR-17-5p;hsa-miR-34c-5p;NC_000006.12_15809;NC_000013.11_27627;NC_000005.10_141…
SLC45A4	ENST00000261530	0.311224	1.30653e-46	38	hsa-miR-33b-3p;NC_000006.12_14671;hsa-miR-25-5p;NC_000013.11_28441;hsa-miR-30c-1-3p;NC_000023.11_36905;hsa-miR-371b-3p;hsa-miR-92a-1-5p;NC_000007.14_17821;hsa-miR-1298-5p;NC_000012.12_25887;hsa-miR-18a-3p;NC_000011.10_25384;NC_000005.10_11919>NC_000005.10_11920;hsa-miR-302c-5p;NC_000013.11_27627;NC_000022.11_36437;NC_000005.10_14158;hsa-miR-7-5p;NC_000001.11_3101;NC_000002.12_3238;NC_000015.10_30…
CTAGE15	NR_027466	0.675	1.42429e-46	25	NC_000013.11_28441;hsa-miR-92a-1-5p;hsa-miR-629-3p;hsa-miR-3662;hsa-miR-302a-5p;NC_000004.12_10500;NC_000009.12_21255;NC_000022.11_36372;hsa-miR-7-5p;NC_000002.12_3238;NC_000003.12_9133;NC_000008.11_20037*;NC_000012.12_25503;hsa-miR-512-3p;hsa-miR-345-5p;hsa-miR-3529-3p;NC_000012.12_26414;hsa-miR-526b-5p;hsa-miR-296-3p;NC_000018.10_33504*;hsa-miR-302b-3p;hsa-miR-582-5p;hsa-miR-205-5p;NC_000013.11…
SLCO4A1	ENST00000281092	0.255	1.4539e-46	36	hsa-miR-33b-3p;NC_000006.12_14671;hsa-miR-30c-1-3p;NC_000008.11_19445;hsa-miR-498;hsa-miR-371b-3p;hsa-miR-92a-1-5p;hsa-miR-629-3p;hsa-miR-27b-5p;NC_000021.9_35751;hsa-miR-18a-3p;NC_000011.10_25384;NC_000005.10_11919>NC_000005.10_11920;NC_000012.12_26286;hsa-miR-17-5p;hsa-miR-34c-5p;NC_000022.11_36372;hsa-miR-1257;NC_000005.10_14158;hsa-miR-7-5p;NC_000002.12_3238;NC_000012.12_25503;NC_000020.11_35…
HSPA13	ENST00000237264	0.482353	1.64915e-46	32	NC_000006.12_14671;NC_000013.11_28441;NC_000008.11_19445;hsa-miR-92a-1-5p;hsa-miR-7974;hsa-miR-518e-5p>hsa-miR-519a-5p>hsa-miR-519b-5p>hsa-miR-519c-5p>hsa-miR-522-5p>hsa-miR-523-5p;hsa-miR-3662;NC_000021.9_35751;NC_000012.12_25887;hsa-miR-18a-3p;NC_000004.12_9892;NC_000006.12_15769;hsa-miR-34c-5p;NC_000013.11_27627;NC_000022.11_36372;hsa-miR-1257;hsa-miR-7-5p;NC_000001.11_3101;NC_000002.12_3238;N…
VDR	NONHSAT215932	0.336134	1.64915e-46	32	hsa-miR-934;hsa-miR-33b-3p;hsa-miR-372-5p;hsa-miR-498;hsa-miR-92a-1-5p;hsa-miR-7974;NC_000021.9_35751;NC_000012.12_25887;NC_000011.10_25384;NC_000005.10_11919>NC_000005.10_11920;hsa-miR-302c-5p;NC_000006.12_15769;hsa-miR-34c-5p;NC_000013.11_27627;NC_000005.10_14158;hsa-miR-26a-1-3p;hsa-miR-1257;NC_000002.12_3238;NC_000003.12_9133;NC_000011.10_25091;NC_000020.11_35116;hsa-let-7c-5p;hsa-miR-296-3p;…
ZFYVE1	NONHSAT215932	0.285714	1.65221e-46	30	hsa-miR-934;hsa-miR-33b-3p;NC_000023.11_36905;NC_000010.11_23303;hsa-miR-92a-1-5p;hsa-miR-518e-5p>hsa-miR-519a-5p>hsa-miR-519b-5p>hsa-miR-519c-5p>hsa-miR-522-5p>hsa-miR-523-5p;NC_000007.14_17821;NC_000010.11_23646;NC_000012.12_25887;NC_000021.9_35751;NC_000011.10_25384;NC_000006.12_15769;hsa-miR-34c-5p;NC_000013.11_27627;NC_000005.10_14158;hsa-miR-26a-1-3p;hsa-miR-1257;NC_000002.12_3238;NC_000003…
KALRN	NR_027379	0.921053	1.66445e-46	27	NC_000024.10_38844;hsa-miR-183-5p;NC_000010.11_22861;hsa-miR-26b-5p;hsa-miR-664a-5p;NC_000002.12_3880;hsa-miR-148a-3p;NC_000003.12_9115;hsa-miR-21-5p;hsa-miR-9-5p;hsa-miR-499a-5p;hsa-miR-193a-5p;NC_000008.11_18787;hsa-miR-659-5p;NC_000011.10_24785;NC_000017.11_32431;hsa-miR-4435;NC_000014.9_29046;NC_000011.10_23807;hsa-miR-22-3p;hsa-miR-24-3p;hsa-miR-6807-5p;hsa-miR-4758-3p;hsa-miR-203a-3p;hsa-mi…
TMEM181	ENST00000432045	0.5	1.66789e-46	29	hsa-miR-372-5p;hsa-miR-30c-1-3p;NC_000008.11_19445;NC_000003.12_7276;hsa-miR-629-3p;NC_000012.12_25887;hsa-miR-18a-3p;NC_000004.12_9892;NC_000009.12_21255;NC_000006.12_15769;hsa-miR-17-5p;hsa-miR-34c-5p;NC_000022.11_36372;hsa-miR-1257;hsa-miR-7-5p;hsa-miR-515-5p;NC_000020.11_35116;hsa-miR-548d-3p;hsa-miR-296-3p;hsa-miR-302b-3p;hsa-miR-20a-5p;hsa-miR-3143;hsa-miR-520c-3p;hsa-miR-373-5p;hsa-miR-522…
RNF14	ENST00000237264	0.552941	1.75563e-46	34	hsa-miR-33b-3p;NC_000006.12_14671;NC_000013.11_28441;hsa-miR-675-5p;hsa-miR-92a-1-5p;hsa-miR-518e-5p>hsa-miR-519a-5p>hsa-miR-519b-5p>hsa-miR-519c-5p>hsa-miR-522-5p>hsa-miR-523-5p;hsa-miR-3662;hsa-miR-510-5p;NC_000012.12_25887;hsa-miR-302c-5p;NC_000006.12_15769;hsa-miR-34c-5p;NC_000006.12_15809;NC_000013.11_27627;NC_000022.11_36437;hsa-miR-26a-1-3p;hsa-miR-1257;hsa-miR-7-5p;NC_000001.11_3101;NC_00…
ZMYM6	ENST00000263967	0.369863	1.75563e-46	34	hsa-miR-372-5p;NC_000013.11_28441;hsa-miR-30c-1-3p;hsa-miR-92a-1-5p;hsa-miR-7974;hsa-miR-629-3p;hsa-miR-3662;NC_000007.14_17821;NC_000010.11_23646;NC_000004.12_10500;NC_000011.10_25384;NC_000004.12_9892;hsa-miR-302c-5p;NC_000022.11_36437;hsa-miR-26a-1-3p;hsa-miR-7-5p;NC_000002.12_3238;hsa-miR-519a-3p;NC_000015.10_30316;hsa-miR-15b-3p;NC_000020.11_35116;NC_000003.12_7520;NC_000012.12_26414;NC_0000…
ABCC4	ENST00000568777	0.454545	1.91119e-46	34	hsa-miR-33b-3p;hsa-miR-372-5p;hsa-miR-30c-1-3p;NC_000005.10_12588;hsa-miR-92a-1-5p;NC_000003.12_7276;hsa-miR-629-3p;NC_000010.11_23646;NC_000003.12_8583;NC_000012.12_25887;hsa-miR-18a-3p;NC_000018.10_33742;NC_000004.12_9892;hsa-miR-302c-5p;NC_000006.12_15769;NC_000002.12_3238;NC_000003.12_7973;NC_000011.10_25091;hsa-miR-512-3p;hsa-miR-515-5p;NC_000020.11_35116;NC_000012.12_26414;hsa-miR-548d-3p;h…
SLC38A1	lnc-POTED-16:1	0.793651	2.1239e-46	31	hsa-miR-372-5p;NC_000013.11_28441;NC_000008.11_19445;hsa-miR-92a-1-5p;hsa-miR-3662;hsa-miR-27b-5p;NC_000012.12_25887;NC_000011.10_25384;NC_000004.12_9892;NC_000006.12_15769;hsa-miR-17-5p;hsa-miR-1257;hsa-miR-7-5p;NC_000012.12_25503;NC_000011.10_25091;hsa-miR-519a-3p;hsa-miR-15b-3p;hsa-miR-302b-5p;hsa-miR-3529-3p;hsa-miR-515-5p;NC_000020.11_35116;NC_000003.12_7520;NC_000018.10_33037;hsa-miR-548d-3…
ASPH	NR_033268	0.394495	2.34729e-46	36	hsa-miR-934;hsa-miR-372-5p;hsa-miR-30c-1-3p;hsa-miR-92a-1-5p;hsa-miR-7974;hsa-miR-518e-5p>hsa-miR-519a-5p>hsa-miR-519b-5p>hsa-miR-519c-5p>hsa-miR-522-5p>hsa-miR-523-5p;hsa-miR-629-3p;NC_000010.11_23646;NC_000003.12_8583;NC_000012.12_25887;NC_000006.12_15769;hsa-miR-17-5p;NC_000022.11_36372;hsa-miR-26a-1-3p;hsa-miR-7-5p;NC_000001.11_3101;NC_000002.12_3238;NC_000011.10_25091;hsa-miR-512-3p;hsa-miR-…
LCOR	NR_033268	0.431193	2.34729e-46	36	hsa-miR-934;hsa-miR-372-5p;hsa-miR-30c-1-3p;NC_000023.11_36905;NC_000010.11_23303;hsa-miR-7974;hsa-miR-518e-5p>hsa-miR-519a-5p>hsa-miR-519b-5p>hsa-miR-519c-5p>hsa-miR-522-5p>hsa-miR-523-5p;hsa-miR-629-3p;NC_000003.12_7276;NC_000007.14_17821;hsa-miR-1298-5p;NC_000021.9_35751;NC_000012.12_25887;hsa-miR-302c-5p;NC_000012.12_26286;NC_000006.12_15769;hsa-miR-17-5p;NC_000022.11_36372;hsa-miR-26a-1-3p;h…
VTI1A	NR_003268	0.795918	2.421e-46	33	hsa-miR-934;hsa-miR-372-5p;hsa-miR-3155a;NC_000013.11_28441;NC_000005.10_12140;NC_000008.11_19445;hsa-miR-518b;hsa-miR-518e-5p>hsa-miR-519a-5p>hsa-miR-519b-5p>hsa-miR-519c-5p>hsa-miR-522-5p>hsa-miR-523-5p;hsa-miR-3662;NC_000004.12_10500;NC_000011.10_25384;hsa-miR-17-5p;hsa-miR-34c-5p;NC_000022.11_36372;NC_000022.11_36437;NC_000002.12_3238;hsa-miR-519a-3p;hsa-miR-512-3p;hsa-miR-302b-5p;hsa-miR-345…
VTI1A	XR_428151	0.857143	2.421e-46	33	hsa-miR-934;hsa-miR-33b-3p;NC_000006.12_14671;hsa-miR-30c-1-3p;NC_000008.11_19445;hsa-miR-498;NC_000010.11_23303;NC_000007.14_17821;hsa-miR-18a-3p;NC_000011.10_25384;NC_000004.12_9892;NC_000006.12_15769;hsa-miR-17-5p;hsa-miR-34c-5p;NC_000022.11_36372;hsa-miR-1257;NC_000002.12_3238;NC_000003.12_7973;hsa-miR-519a-3p;NC_000015.10_30316;hsa-miR-3529-3p;hsa-miR-517a-3p>hsa-miR-517b-3p;hsa-miR-296-3p;N…
RHBDD1	ENST00000281092	0.295	2.68309e-46	37	NC_000006.12_14671;hsa-miR-30c-1-3p;NC_000008.11_19445;hsa-miR-675-5p;hsa-miR-92a-1-5p;hsa-miR-629-3p;hsa-miR-27b-5p;hsa-miR-18a-3p;NC_000011.10_25384;hsa-miR-302c-5p;NC_000006.12_15769;hsa-miR-34c-5p;NC_000006.12_15809;NC_000013.11_27627;NC_000022.11_36372;hsa-miR-1257;hsa-miR-26a-1-3p;hsa-miR-7-5p;NC_000002.12_3238;NC_000003.12_7973;hsa-miR-15b-3p;hsa-miR-3529-3p;NC_000016.10_31157;NC_000012.12…
SH2B3	ENST00000261530	0.295918	2.97891e-46	38	hsa-miR-934;hsa-miR-33b-3p;NC_000006.12_14671;hsa-miR-30c-1-3p;NC_000023.11_36905;NC_000010.11_23303;hsa-miR-371b-3p;hsa-miR-92a-1-5p;NC_000003.12_7276;hsa-miR-27b-5p;NC_000012.12_25887;hsa-miR-18a-3p;NC_000005.10_11919>NC_000005.10_11920;hsa-miR-17-5p;NC_000005.10_14158;NC_000022.11_36437;hsa-miR-26a-1-3p;hsa-miR-7-5p;NC_000002.12_3238;NC_000003.12_7973;NC_000012.12_25503;hsa-miR-345-5p;hsa-miR-…
HIPK3	ENST00000432045	0.6375	3.27181e-46	31	NC_000006.12_14671;hsa-miR-372-5p;hsa-miR-30c-1-3p;NC_000008.11_19445;hsa-miR-498;NC_000012.12_25887;hsa-miR-18a-3p;NC_000011.10_25384;NC_000004.12_9892;NC_000006.12_15769;hsa-miR-17-5p;hsa-miR-34c-5p;NC_000022.11_36372;hsa-miR-1257;hsa-miR-7-5p;NC_000011.10_25091;hsa-miR-515-5p;hsa-miR-548d-3p;NT_187601.1_39493>NC_000014.9_29213;hsa-miR-20a-5p;hsa-miR-302b-3p;hsa-miR-3143;hsa-miR-582-5p;hsa-miR-…
HIPK3	lnc-POTED-16:1	0.68254	3.39465e-46	30	hsa-miR-1323;hsa-miR-372-5p;NC_000008.11_19445;hsa-miR-92a-1-5p;NC_000012.12_25887;NC_000011.10_25384;NC_000004.12_9892;NC_000012.12_26286;NC_000006.12_15769;hsa-miR-17-5p;hsa-miR-1257;hsa-miR-7-5p;NC_000012.12_25503;NC_000011.10_25091;hsa-miR-519a-3p;hsa-miR-15b-3p;hsa-miR-3529-3p;hsa-miR-515-5p;NC_000018.10_33037;hsa-miR-548d-3p;hsa-miR-302b-3p;hsa-miR-20a-5p;hsa-miR-3143;hsa-miR-582-5p;hsa-miR…
SWT1	NONHSAT215932	0.394958	3.4394e-46	33	NC_000013.11_28441;hsa-miR-498;hsa-miR-92a-1-5p;NC_000010.11_23646;NC_000012.12_25887;NC_000011.10_25384;NC_000005.10_11919>NC_000005.10_11920;hsa-miR-302c-5p;NC_000012.12_26286;NC_000006.12_15769;hsa-miR-17-5p;NC_000013.11_27627;hsa-miR-1257;NC_000002.12_3238;NC_000003.12_9133;NC_000003.12_7973;NC_000008.11_20037*;NC_000011.10_25091;hsa-miR-15b-3p;NC_000003.12_7520;NC_000016.10_31157;NC_000012.1…
GALNT5	NONHSAT219565	0.792453	3.49415e-46	34	NC_000006.12_14671;NC_000013.11_28441;NC_000009.12_20733;NC_000008.11_19445;hsa-miR-3662;hsa-miR-510-5p;hsa-miR-302a-5p;NC_000003.12_8583;NC_000011.10_25384;hsa-miR-17-5p;hsa-miR-34c-5p;NC_000022.11_36372;NC_000002.12_3238;NC_000003.12_9133;NC_000003.12_7973;NC_000018.10_33480;NC_000012.12_25503;NC_000011.10_25091;NC_000015.10_30316;hsa-miR-302b-5p;NC_000003.12_7520;NC_000016.10_31157;hsa-let-7c-…
GABBR1	ENST00000281092	0.24	3.67941e-46	35	hsa-miR-33b-3p;hsa-miR-30c-1-3p;hsa-miR-371b-3p;NC_000010.11_23303;hsa-miR-675-5p;hsa-miR-92a-1-5p;hsa-miR-629-3p;hsa-miR-1298-5p;NC_000012.12_25887;hsa-miR-18a-3p;NC_000005.10_11919>NC_000005.10_11920;NC_000012.12_26286;NC_000006.12_15769;hsa-miR-17-5p;hsa-miR-34c-5p;NC_000006.12_15809;NC_000005.10_14158;hsa-miR-1257;hsa-miR-7-5p;NC_000002.12_3238;hsa-miR-15b-3p;hsa-miR-3529-3p;hsa-miR-515-5p;NC…
MAP2	NONHSAT217150	0.711538	3.90049e-46	33	hsa-miR-33b-3p;hsa-miR-372-5p;hsa-miR-3155a;NC_000013.11_28441;hsa-miR-30c-1-3p;hsa-miR-498;NC_000010.11_23303;hsa-miR-371b-3p;hsa-miR-629-3p;hsa-miR-3662;hsa-miR-27b-5p;NC_000021.9_35751;NC_000004.12_10500;NC_000011.10_25384;NC_000005.10_11919>NC_000005.10_11920;hsa-miR-17-5p;NC_000006.12_15809;hsa-miR-1257;NC_000001.11_3101;NC_000002.12_3238;NC_000003.12_9133;NC_000015.10_30316;hsa-miR-15b-3p;h…
GPCPD1	NONHSAT224112	0.56	3.91021e-46	34	hsa-miR-371a-5p;hsa-miR-372-5p;NC_000013.11_28441;NC_000008.11_19445;hsa-miR-3662;NC_000012.12_25887;hsa-miR-18a-3p;NC_000004.12_10500;NC_000006.12_15769;NC_000013.11_27627;NC_000022.11_36372;hsa-miR-26a-1-3p;NC_000022.11_36437;NC_000003.12_9133;hsa-miR-520a-3p;NC_000023.11_38289;hsa-miR-512-3p;hsa-miR-5585-3p;hsa-miR-92a-3p;NC_000007.14_16719;NC_000016.10_31157;NC_000018.10_33037;hsa-let-7c-5p;h…
LCOR	ENST00000563635	0.567568	3.95052e-46	33	hsa-miR-934;hsa-miR-372-5p;NC_000008.11_19445;NC_000005.10_12588;hsa-miR-518e-5p>hsa-miR-519a-5p>hsa-miR-519b-5p>hsa-miR-519c-5p>hsa-miR-522-5p>hsa-miR-523-5p;NC_000003.12_7276;NC_000007.14_17821;NC_000021.9_35751;NC_000012.12_25887;NC_000011.10_25384;NC_000004.12_9892;hsa-miR-302c-5p;NC_000006.12_15769;hsa-miR-17-5p;NC_000022.11_36372;hsa-miR-26a-1-3p;NC_000001.11_3101;NC_000008.11_20037*;hsa-mi…
LAMC2	NONHSAT215932	0.277311	3.973e-46	31	hsa-miR-33b-3p;hsa-miR-498;NC_000023.11_36905;hsa-miR-92a-1-5p;hsa-miR-7974;hsa-miR-518e-5p>hsa-miR-519a-5p>hsa-miR-519b-5p>hsa-miR-519c-5p>hsa-miR-522-5p>hsa-miR-523-5p;NC_000007.14_17821;NC_000012.12_25887;NC_000012.12_26286;NC_000006.12_15769;hsa-miR-17-5p;hsa-miR-34c-5p;NC_000013.11_27627;hsa-miR-26a-1-3p;hsa-miR-1257;NC_000002.12_3238;NC_000003.12_9133;NC_000011.10_25091;hsa-miR-519a-3p;NC_0…
FBXO32	ENST00000237264	0.505882	4.01723e-46	34	NC_000006.12_14671;NC_000005.10_12140;NC_000008.11_19445;NC_000005.10_12588;hsa-miR-675-5p;hsa-miR-7974;hsa-miR-3662;hsa-miR-510-5p;NC_000012.12_25887;hsa-miR-18a-3p;NC_000011.10_25384;NC_000004.12_9892;hsa-miR-302c-5p;NC_000006.12_15769;hsa-miR-34c-5p;NC_000013.11_27627;NC_000022.11_36372;hsa-miR-26a-1-3p;hsa-miR-1257;hsa-miR-7-5p;NC_000001.11_3101;NC_000003.12_7973;NC_000020.11_35116;NC_000012.…
PLEKHH2	ENST00000432045	0.6	4.49081e-46	29	hsa-miR-372-5p;hsa-miR-30c-1-3p;NC_000008.11_19445;NC_000003.12_7276;NC_000012.12_25887;hsa-miR-18a-3p;NC_000011.10_25384;NC_000004.12_9892;NC_000009.12_21255;NC_000006.12_15769;hsa-miR-17-5p;NC_000022.11_36372;hsa-miR-1257;NC_000011.10_25091;hsa-miR-515-5p;NC_000003.12_7520;NT_187601.1_39493>NC_000014.9_29213;hsa-miR-20a-5p;hsa-miR-302b-3p;hsa-miR-3143;hsa-miR-520c-3p;hsa-miR-373-5p;hsa-miR-522-…
HSPA13	ENST00000261530	0.244898	5.21005e-46	34	NC_000006.12_14671;NC_000013.11_28441;NC_000008.11_19445;NC_000010.11_23303;hsa-miR-92a-1-5p;NC_000021.9_35751;NC_000012.12_25887;hsa-miR-18a-3p;NC_000004.12_9892;hsa-miR-34c-5p;NC_000013.11_27627;hsa-miR-1257;hsa-miR-7-5p;NC_000001.11_3101;NC_000002.12_3238;NC_000003.12_7973;hsa-miR-519a-3p;hsa-miR-3529-3p;hsa-miR-515-5p;NC_000020.11_35116;NC_000003.12_7520;NC_000018.10_33037;hsa-miR-548d-3p;NT_…
VCPIP1	ENST00000568777	0.488636	5.59418e-46	32	hsa-miR-934;hsa-miR-33b-3p;hsa-miR-372-5p;hsa-miR-30c-1-3p;NC_000005.10_12588;hsa-miR-675-5p;hsa-miR-629-3p;NC_000012.12_25887;hsa-miR-18a-3p;NC_000018.10_33742;NC_000004.12_9892;hsa-miR-302c-5p;NC_000006.12_15769;hsa-miR-34c-5p;hsa-miR-26a-1-3p;hsa-miR-7-5p;NC_000002.12_3238;NC_000003.12_7973;NC_000012.12_25503;NC_000011.10_25091;hsa-miR-345-5p;hsa-miR-515-5p;NC_000003.12_7520;hsa-miR-548d-3p;hs…
LYST	NONHSAT219565	0.735849	5.84969e-46	34	hsa-miR-934;NC_000006.12_14671;NC_000013.11_28441;hsa-miR-498;NC_000008.11_19445;hsa-miR-3662;hsa-miR-510-5p;hsa-miR-27b-5p;NC_000003.12_8583;NC_000011.10_25384;NC_000009.12_21255;hsa-miR-17-5p;hsa-miR-34c-5p;NC_000022.11_36372;NC_000002.12_3238;NC_000003.12_7973;NC_000018.10_33480;NC_000012.12_25503;hsa-miR-519a-3p;NC_000015.10_30316;hsa-miR-15b-3p;NC_000003.12_7520;NC_000016.10_31157;NC_000018.…
RALGPS2	NR_034072	0.714286	6.04953e-46	33	hsa-miR-934;hsa-miR-25-5p;hsa-miR-372-5p;NC_000013.11_28441;hsa-miR-30c-1-3p;hsa-miR-3662;hsa-miR-302a-5p;NC_000012.12_25887;NC_000004.12_10500;NC_000011.10_25384;hsa-miR-302c-5p;NC_000006.12_15769;NC_000006.12_15809;NC_000013.11_27627;hsa-miR-26a-1-3p;hsa-miR-7-5p;NC_000002.12_3238;hsa-miR-512-3p;hsa-miR-345-5p;hsa-miR-3529-3p;hsa-miR-515-5p;NC_000012.12_26414;hsa-miR-526b-5p;NT_187601.1_39493>N…
GPCPD1	ENST00000281092	0.325	6.15175e-46	37	hsa-miR-33b-3p;hsa-miR-372-5p;hsa-miR-30c-1-3p;NC_000008.11_19445;hsa-miR-371b-3p;NC_000012.12_25887;hsa-miR-18a-3p;NC_000011.10_25384;hsa-miR-302c-5p;NC_000012.12_26286;NC_000006.12_15769;hsa-miR-17-5p;hsa-miR-34c-5p;NC_000006.12_15809;NC_000013.11_27627;NC_000022.11_36372;NC_000005.10_14158;hsa-miR-1257;hsa-miR-26a-1-3p;NC_000001.11_3101;NC_000002.12_3238;NC_000003.12_7973;hsa-miR-3529-3p;NC_00…
XIAP	ENST00000432045	0.6625	6.31772e-46	32	hsa-miR-25-5p;hsa-miR-372-5p;hsa-miR-30c-1-3p;hsa-miR-498;NC_000008.11_19445;NC_000003.12_7276;hsa-miR-629-3p;NC_000012.12_25887;hsa-miR-18a-3p;NC_000011.10_25384;NC_000004.12_9892;NC_000009.12_21255;NC_000006.12_15769;hsa-miR-17-5p;hsa-miR-34c-5p;NC_000022.11_36372;hsa-miR-26a-1-3p;hsa-miR-1257;hsa-miR-7-5p;NC_000008.11_20037*;NC_000011.10_25091;NC_000003.12_7520;hsa-miR-302b-3p;hsa-miR-20a-5p;h…
MAP2	NR_002775	0.736842	6.33546e-46	32	hsa-miR-3155a;hsa-miR-30c-1-3p;NC_000008.11_19445;NC_000010.11_23303;hsa-miR-629-3p;hsa-miR-3662;hsa-miR-510-5p;NC_000007.14_17821;NC_000003.12_8583;hsa-miR-27b-5p;NC_000010.11_23646;NC_000011.10_25384;NC_000005.10_11919>NC_000005.10_11920;NC_000009.12_21255;NC_000012.12_26286;hsa-miR-17-5p;hsa-miR-26a-1-3p;NC_000001.11_3101;NC_000003.12_7973;NC_000012.12_25503;NC_000015.10_30316;hsa-miR-512-3p;h…
MAP2	lnc-C6orf228-2:1	0.716981	6.33546e-46	32	hsa-miR-372-5p;NC_000013.11_28441;hsa-miR-371b-3p;hsa-miR-518e-5p>hsa-miR-519a-5p>hsa-miR-519b-5p>hsa-miR-519c-5p>hsa-miR-522-5p>hsa-miR-523-5p;hsa-miR-629-3p;NC_000012.12_25887;NC_000003.12_8583;NC_000009.12_21255;NC_000006.12_15769;hsa-miR-17-5p;hsa-miR-34c-5p;NC_000003.12_9133;NC_000003.12_7973;NC_000018.10_33480;NC_000015.10_30316;hsa-miR-512-3p;hsa-miR-302b-5p;NC_000016.10_31157;NC_000012.12…
SH2B3	NONHSAT215932	0.428571	6.3881e-46	35	hsa-miR-934;hsa-miR-33b-3p;hsa-miR-30c-1-3p;NC_000023.11_36905;NC_000010.11_23303;hsa-miR-92a-1-5p;hsa-miR-7974;NC_000012.12_25887;NC_000005.10_11919>NC_000005.10_11920;NC_000012.12_26286;NC_000006.12_15769;hsa-miR-17-5p;NC_000005.10_14158;hsa-miR-26a-1-3p;NC_000002.12_3238;NC_000003.12_9133;NC_000003.12_7973;NC_000008.11_20037*;hsa-miR-15b-3p;NC_000020.11_35116;NC_000003.12_7520;NC_000009.12_219…
ABCC4	ENST00000237264	0.552941	6.3881e-46	35	hsa-miR-33b-3p;NC_000008.11_19445;NC_000005.10_12588;hsa-miR-92a-1-5p;hsa-miR-7974;hsa-miR-3662;hsa-miR-1298-5p;NC_000021.9_35751;NC_000012.12_25887;hsa-miR-18a-3p;NC_000005.10_11919>NC_000005.10_11920;NC_000004.12_9892;hsa-miR-302c-5p;NC_000006.12_15769;NC_000013.11_27627;NC_000022.11_36372;hsa-miR-1257;NC_000002.12_3238;NC_000003.12_7973;NC_000018.10_33480;NC_000020.11_35116;NC_000012.12_26414;…
GRB10	NONHSAT215932	0.378151	6.43459e-46	36	hsa-miR-33b-3p;hsa-miR-372-5p;hsa-miR-30c-1-3p;NC_000023.11_36905;NC_000010.11_23303;hsa-miR-92a-1-5p;hsa-miR-7974;hsa-miR-518e-5p>hsa-miR-519a-5p>hsa-miR-519b-5p>hsa-miR-519c-5p>hsa-miR-522-5p>hsa-miR-523-5p;NC_000010.11_23646;NC_000012.12_25887;NC_000011.10_25384;NC_000005.10_11919>NC_000005.10_11920;hsa-miR-302c-5p;NC_000012.12_26286;NC_000006.12_15769;hsa-miR-34c-5p;NC_000005.10_14158;hsa-miR…
ATP2B4	ENST00000237264	0.517647	6.43459e-46	36	NC_000001.11_2008;NC_000006.12_14671;NC_000013.11_28441;NC_000005.10_12588;hsa-miR-675-5p;hsa-miR-92a-1-5p;hsa-miR-7974;hsa-miR-3662;hsa-miR-510-5p;hsa-miR-27b-5p;NC_000021.9_35751;NC_000012.12_25887;hsa-miR-18a-3p;NC_000011.10_25384;NC_000005.10_11919>NC_000005.10_11920;NC_000004.12_9892;NC_000006.12_15769;hsa-miR-34c-5p;NC_000013.11_27627;NC_000022.11_36437;hsa-miR-26a-1-3p;hsa-miR-1257;hsa-miR…
ARHGAP5	XR_428151	0.678571	6.58808e-46	29	hsa-miR-30c-1-3p;NC_000008.11_19445;hsa-miR-498;NC_000007.14_17821;hsa-miR-18a-3p;NC_000011.10_25384;NC_000018.10_33742;NC_000004.12_9892;NC_000006.12_15769;hsa-miR-17-5p;NC_000022.11_36372;hsa-miR-1257;NC_000002.12_3238;NC_000003.12_7973;NC_000011.10_25091;hsa-miR-519a-3p;hsa-miR-3529-3p;hsa-miR-515-5p;hsa-miR-548d-3p;hsa-miR-296-3p;hsa-miR-302b-3p;hsa-miR-20a-5p;hsa-miR-3143;hsa-miR-582-5p;hsa-…
FBXO32	NR_034072	0.603175	6.74076e-46	31	hsa-miR-1323;hsa-miR-372-5p;hsa-miR-30c-1-3p;hsa-miR-371b-3p;hsa-miR-7974;hsa-miR-3662;hsa-miR-510-5p;hsa-miR-302a-5p;NC_000012.12_25887;NC_000011.10_25384;hsa-miR-302c-5p;NC_000006.12_15769;hsa-miR-17-5p;NC_000013.11_27627;hsa-miR-26a-1-3p;hsa-miR-7-5p;hsa-miR-512-3p;hsa-miR-3529-3p;NC_000003.12_7520;NC_000012.12_26414;hsa-miR-526b-5p;hsa-miR-296-3p;NT_187601.1_39493>NC_000014.9_29213;hsa-miR-20…
VEGFA	NR_033268	0.366972	6.79374e-46	32	hsa-miR-3155a;NC_000013.11_28441;NC_000023.11_36905;hsa-miR-371b-3p;hsa-miR-7974;hsa-miR-629-3p;hsa-miR-510-5p;NC_000012.12_25887;hsa-miR-18a-3p;NC_000012.12_26286;NC_000006.12_15769;hsa-miR-17-5p;NC_000005.10_14158;NC_000002.12_3238;NC_000003.12_9133;hsa-miR-520a-3p;NC_000011.10_25091;hsa-miR-512-3p;hsa-miR-302b-5p;NC_000020.11_35116;NC_000012.12_26414;hsa-let-7c-5p;hsa-miR-526b-5p;hsa-miR-302b-…
TMEM123	ENST00000281092	0.235	7.04967e-46	31	hsa-miR-1323;hsa-miR-372-5p;NC_000008.11_19445;hsa-miR-371b-3p;NC_000012.12_25887;NC_000004.12_9892;hsa-miR-302c-5p;NC_000012.12_26286;NC_000006.12_15769;hsa-miR-17-5p;NC_000006.12_15809;NC_000008.11_20037*;NC_000011.10_25091;hsa-miR-3529-3p;hsa-miR-548d-3p;NC_000012.12_26721;hsa-miR-296-3p;hsa-miR-302b-3p;NT_187601.1_39493>NC_000014.9_29213;hsa-miR-20a-5p;NC_000009.12_21925;hsa-miR-3143;hsa-miR-…
MAP3K5	ENST00000281092	0.215	7.44293e-46	34	hsa-miR-33b-3p;NC_000006.12_14671;NC_000010.11_23303;hsa-miR-92a-1-5p;hsa-miR-629-3p;NC_000011.10_25384;NC_000005.10_11919>NC_000005.10_11920;hsa-miR-17-5p;hsa-miR-34c-5p;NC_000013.11_27627;NC_000022.11_36372;NC_000005.10_14158;hsa-miR-1257;hsa-miR-7-5p;NC_000002.12_3238;NC_000003.12_7973;NC_000012.12_25503;NC_000011.10_25091;hsa-miR-15b-3p;hsa-miR-515-5p;NC_000003.12_7520;hsa-miR-517a-3p>hsa-miR…
CHD9	NR_033268	0.431193	7.87461e-46	35	hsa-miR-934;hsa-miR-30c-1-3p;NC_000010.11_23303;hsa-miR-92a-1-5p;hsa-miR-7974;hsa-miR-629-3p;NC_000003.12_7276;NC_000007.14_17821;NC_000021.9_35751;NC_000012.12_25887;hsa-miR-18a-3p;hsa-miR-302c-5p;NC_000012.12_26286;NC_000006.12_15769;hsa-miR-17-5p;NC_000022.11_36372;hsa-miR-26a-1-3p;hsa-miR-7-5p;NC_000002.12_3238;NC_000011.10_25091;hsa-miR-345-5p;NC_000020.11_35116;NC_000012.12_26414;hsa-miR-29…
DNAJC10	NR_033268	0.385321	8.00894e-46	34	hsa-miR-934;hsa-miR-372-5p;NC_000013.11_28441;hsa-miR-30c-1-3p;hsa-miR-92a-1-5p;hsa-miR-518b;hsa-miR-7974;NC_000003.12_7276;NC_000007.14_17821;hsa-miR-1298-5p;NC_000012.12_25887;hsa-miR-18a-3p;hsa-miR-302c-5p;NC_000006.12_15769;hsa-miR-17-5p;NC_000022.11_36372;NC_000005.10_14158;hsa-miR-26a-1-3p;hsa-miR-7-5p;NC_000020.11_35116;NC_000012.12_26414;hsa-miR-526b-5p;NT_187601.1_39493>NC_000014.9_29213…
VCPIP1	NONHSAT215070	0.692308	8.3268e-46	28	hsa-miR-372-5p;hsa-miR-30c-1-3p;NC_000008.11_19445;hsa-miR-498;NC_000012.12_25887;NC_000011.10_25384;NC_000018.10_33742;NC_000004.12_9892;NC_000009.12_21255;NC_000006.12_15769;hsa-miR-17-5p;hsa-miR-34c-5p;NC_000022.11_36372;hsa-miR-1257;hsa-miR-26a-1-3p;hsa-miR-7-5p;NC_000008.11_20037*;NC_000003.12_7973;NC_000015.10_30316;hsa-miR-345-5p;NT_187601.1_39493>NC_000014.9_29213;hsa-miR-20a-5p;hsa-miR-3…
GFPT1	NONHSAT219565	0.773585	8.33339e-46	33	hsa-miR-934;hsa-miR-498;NC_000008.11_19445;hsa-miR-3662;hsa-miR-27b-5p;NC_000003.12_8583;NC_000009.12_21255;hsa-miR-17-5p;hsa-miR-34c-5p;NC_000022.11_36372;NC_000003.12_9133;NC_000003.12_7973;NC_000012.12_25503;NC_000011.10_25091;hsa-miR-519a-3p;NC_000015.10_30316;hsa-miR-15b-3p;hsa-miR-302b-5p;NC_000003.12_7520;NC_000016.10_31157;hsa-let-7c-5p;NC_000018.10_33504*;NT_187601.1_39493>NC_000014.9_29…
NCOA3	ENST00000563635	0.635135	8.39081e-46	33	hsa-miR-33b-3p;NC_000006.12_14671;hsa-miR-372-5p;NC_000013.11_28441;NC_000008.11_19445;hsa-miR-498;NC_000005.10_12588;hsa-miR-3662;NC_000007.14_17821;NC_000012.12_25887;hsa-miR-18a-3p;NC_000011.10_25384;NC_000004.12_9892;hsa-miR-302c-5p;NC_000006.12_15769;hsa-miR-17-5p;NC_000022.11_36372;NC_000022.11_36437;hsa-miR-26a-1-3p;NC_000001.11_3101;hsa-miR-519a-3p;NC_000015.10_30316;hsa-miR-512-3p;hsa-mi…
NCOA3	ENST00000568777	0.477273	8.39081e-46	33	hsa-miR-33b-3p;hsa-miR-372-5p;NC_000013.11_28441;hsa-miR-30c-1-3p;NC_000005.10_12588;hsa-miR-675-5p;hsa-miR-92a-1-5p;hsa-miR-629-3p;NC_000010.11_23646;NC_000012.12_25887;hsa-miR-18a-3p;NC_000018.10_33742;NC_000004.12_9892;hsa-miR-302c-5p;NC_000006.12_15769;hsa-miR-26a-1-3p;NC_000001.11_3101;NC_000002.12_3238;NC_000003.12_7973;hsa-miR-512-3p;hsa-miR-345-5p;hsa-miR-515-5p;NC_000003.12_7520;NC_00002…
KIAA1033	ENST00000432045	0.5375	8.3942e-46	28	hsa-miR-372-5p;NC_000008.11_19445;hsa-miR-629-3p;NC_000012.12_25887;NC_000004.12_9892;NC_000009.12_21255;NC_000006.12_15769;hsa-miR-17-5p;hsa-miR-34c-5p;NC_000022.11_36372;hsa-miR-26a-1-3p;hsa-miR-7-5p;NC_000008.11_20037*;NC_000011.10_25091;hsa-miR-515-5p;NC_000003.12_7520;hsa-miR-548d-3p;hsa-miR-296-3p;NT_187601.1_39493>NC_000014.9_29213;hsa-miR-20a-5p;hsa-miR-302b-3p;hsa-miR-582-5p;hsa-miR-520c…
CTH	NONHSAT215932	0.378151	8.52279e-46	33	NC_000013.11_28441;hsa-miR-30c-1-3p;NC_000023.11_36905;NC_000010.11_23303;hsa-miR-92a-1-5p;hsa-miR-7974;hsa-miR-518e-5p>hsa-miR-519a-5p>hsa-miR-519b-5p>hsa-miR-519c-5p>hsa-miR-522-5p>hsa-miR-523-5p;NC_000007.14_17821;NC_000021.9_35751;NC_000011.10_25384;hsa-miR-302c-5p;NC_000006.12_15769;hsa-miR-17-5p;NC_000013.11_27627;hsa-miR-1257;NC_000003.12_9133;NC_000003.12_7973;hsa-miR-519a-3p;NC_000003.12…
EGFR	NR_038921	0.4	8.52279e-46	33	NC_000001.11_2008;hsa-miR-25-5p;hsa-miR-372-5p;NC_000008.11_19445;hsa-miR-371b-3p;hsa-miR-3662;hsa-miR-1298-5p;NC_000012.12_25887;NC_000011.10_25384;NC_000012.12_26286;NC_000006.12_15769;hsa-miR-17-5p;NC_000013.11_27627;hsa-miR-26a-1-3p;NC_000002.12_3238;NC_000003.12_7973;NC_000015.10_30316;hsa-miR-515-5p;NC_000020.11_35116;hsa-miR-548d-3p;hsa-miR-526b-5p;NT_187601.1_39493>NC_000014.9_29213;hsa-m…
ASPH	ENST00000237264	0.482353	8.99928e-46	34	hsa-miR-33b-3p;NC_000006.12_14671;NC_000008.11_19445;hsa-miR-92a-1-5p;hsa-miR-7974;hsa-miR-518e-5p>hsa-miR-519a-5p>hsa-miR-519b-5p>hsa-miR-519c-5p>hsa-miR-522-5p>hsa-miR-523-5p;hsa-miR-3662;NC_000012.12_25887;NC_000006.12_15769;hsa-miR-34c-5p;NC_000006.12_15809;NC_000013.11_27627;NC_000022.11_36372;NC_000022.11_36437;hsa-miR-1257;hsa-miR-7-5p;hsa-miR-26a-1-3p;NC_000001.11_3101;NC_000002.12_3238;N…
NCKAP1	NONHSAT215070	0.634615	9.1257e-46	27	hsa-miR-372-5p;hsa-miR-30c-1-3p;NC_000008.11_19445;NC_000007.14_17821;NC_000012.12_25887;NC_000011.10_25384;NC_000004.12_9892;NC_000009.12_21255;NC_000006.12_15769;hsa-miR-17-5p;hsa-miR-34c-5p;NC_000022.11_36372;hsa-miR-1257;hsa-miR-26a-1-3p;hsa-miR-7-5p;NC_000008.11_20037*;NC_000003.12_7973;hsa-miR-519a-3p;hsa-miR-302b-3p;NT_187601.1_39493>NC_000014.9_29213;hsa-miR-20a-5p;NC_000007.14_17077;hsa-…
ABCC3	NR_003587	0.37234	9.1447e-46	29	hsa-miR-371a-5p;hsa-miR-3155a;NC_000005.10_12140;NC_000023.11_36905;NC_000010.11_23303;hsa-miR-371b-3p;hsa-miR-92a-1-5p;hsa-miR-7974;NC_000007.14_17821;hsa-miR-302a-5p;hsa-miR-510-5p;NC_000003.12_8583;hsa-miR-1298-5p;NC_000010.11_23646;NC_000021.9_35751;NC_000005.10_11919>NC_000005.10_11920;hsa-miR-34c-5p;NC_000005.10_14158;hsa-miR-7-5p;NC_000002.12_3238;hsa-miR-512-3p;NC_000015.10_30316;NC_00001…
HIPK3	ENST00000395116	0.7	9.80433e-46	29	hsa-miR-498;hsa-miR-675-5p;NC_000012.12_25887;hsa-miR-18a-3p;NC_000011.10_25384;NC_000004.12_9892;hsa-miR-17-5p;NC_000013.11_27627;hsa-miR-1257;hsa-miR-7-5p;NC_000003.12_7973;NC_000011.10_25091;hsa-miR-515-5p;NC_000012.12_26414;NC_000018.10_33037;hsa-miR-548d-3p;hsa-miR-302b-3p;hsa-miR-20a-5p;NC_000009.12_21925;hsa-miR-3143;hsa-miR-582-5p;hsa-miR-520c-3p;hsa-miR-373-5p;hsa-miR-522-3p;NC_000005.10…
SLCO1B3	ENST00000263967	0.280822	9.80433e-46	29	hsa-miR-33b-3p;hsa-miR-498;hsa-miR-92a-1-5p;hsa-miR-3662;NC_000012.12_25887;hsa-miR-302c-5p;NC_000006.12_15769;hsa-miR-17-5p;hsa-miR-1257;hsa-miR-26a-1-3p;NC_000002.12_3238;NC_000011.10_25091;hsa-miR-519a-3p;NC_000015.10_30316;hsa-miR-345-5p;NC_000003.12_7520;NC_000012.12_26414;hsa-miR-302b-3p;hsa-miR-20a-5p;NC_000007.14_17077;hsa-miR-3143;hsa-miR-582-5p;hsa-miR-520c-3p;hsa-miR-373-5p;hsa-miR-522…
ABLIM3	ENST00000261530	0.214286	9.85986e-46	35	hsa-miR-934;NC_000006.12_14671;hsa-miR-372-5p;NC_000013.11_28441;hsa-miR-30c-1-3p;NC_000023.11_36905;NC_000010.11_23303;hsa-miR-92a-1-5p;NC_000003.12_7276;hsa-miR-629-3p;NC_000011.10_25384;NC_000005.10_11919>NC_000005.10_11920;hsa-miR-302c-5p;hsa-miR-17-5p;hsa-miR-34c-5p;hsa-miR-26a-1-3p;NC_000022.11_36437;NC_000002.12_3238;NC_000003.12_7973;NC_000015.10_30316;hsa-miR-3529-3p;NC_000003.12_7520;NC…
KLHL5	ENST00000263967	0.486301	1.0314e-45	34	hsa-miR-934;hsa-miR-372-5p;NC_000013.11_28441;hsa-miR-30c-1-3p;hsa-miR-629-3p;hsa-miR-3662;NC_000010.11_23646;NC_000012.12_25887;NC_000004.12_10500;NC_000011.10_25384;NC_000018.10_33742;hsa-miR-302c-5p;NC_000006.12_15769;hsa-miR-17-5p;NC_000022.11_36437;hsa-miR-7-5p;NC_000002.12_3238;hsa-miR-15b-3p;hsa-miR-302b-5p;NC_000020.11_35116;NC_000016.10_31157;NC_000012.12_26414;NC_000018.10_33037;hsa-let…
PNPLA8	NONHSAT123764	0.544118	1.12594e-45	30	NC_000006.12_14671;hsa-miR-372-5p;NC_000013.11_28441;hsa-miR-30c-1-3p;NC_000005.10_12140;hsa-miR-371b-3p;hsa-miR-7974;NC_000003.12_8583;NC_000021.9_35751;NC_000011.10_25384;hsa-miR-302c-5p;hsa-miR-17-5p;NC_000013.11_27627;NC_000022.11_36372;NC_000022.11_36437;NC_000002.12_3238;NC_000003.12_7973;NC_000018.10_33480;hsa-miR-519a-3p;hsa-miR-512-3p;hsa-miR-15b-3p;hsa-miR-5585-3p;NC_000007.14_16719;NC_…
IARS	ENST00000281092	0.2	1.1314e-45	33	hsa-miR-33b-3p;hsa-miR-372-5p;hsa-miR-30c-1-3p;hsa-miR-498;hsa-miR-371b-3p;hsa-miR-92a-1-5p;hsa-miR-1298-5p;NC_000012.12_25887;hsa-miR-18a-3p;NC_000011.10_25384;NC_000006.12_15769;hsa-miR-17-5p;hsa-miR-34c-5p;NC_000005.10_14158;hsa-miR-1257;hsa-miR-7-5p;NC_000008.11_20037*;hsa-miR-3529-3p;NC_000003.12_7520;NC_000020.11_35116;hsa-miR-517a-3p>hsa-miR-517b-3p;NC_000012.12_26414;hsa-miR-296-3p;NT_187…
HIPK2	NR_003587	0.744681	1.1516e-45	34	hsa-miR-371a-5p;hsa-miR-3155a;NC_000005.10_12140;NC_000023.11_36905;NC_000010.11_23303;hsa-miR-371b-3p;hsa-miR-92a-1-5p;hsa-miR-7974;NC_000007.14_17821;hsa-miR-302a-5p;hsa-miR-510-5p;NC_000003.12_8583;hsa-miR-1298-5p;NC_000010.11_23646;NC_000021.9_35751;NC_000004.12_10500;NC_000005.10_11919>NC_000005.10_11920;NC_000006.12_15769;hsa-miR-34c-5p;NC_000005.10_14158;hsa-miR-7-5p;NC_000002.12_3238;NC_0…
HIPK2	lnc-POTED-16:1	0.888889	1.16223e-45	33	hsa-miR-1323;hsa-miR-372-5p;NC_000013.11_28441;NC_000008.11_19445;NC_000010.11_23303;hsa-miR-92a-1-5p;hsa-miR-3662;NC_000007.14_17821;NC_000012.12_25887;NC_000011.10_25384;NC_000004.12_9892;NC_000012.12_26286;NC_000006.12_15769;hsa-miR-17-5p;hsa-miR-7-5p;NC_000011.10_25091;hsa-miR-519a-3p;hsa-miR-15b-3p;hsa-miR-302b-5p;hsa-miR-515-5p;NC_000020.11_35116;NC_000003.12_7520;NC_000018.10_33037;hsa-miR…
SCYL2	lnc-POTED-16:1	0.619048	1.20191e-45	28	hsa-miR-372-5p;NC_000013.11_28441;NC_000008.11_19445;NC_000010.11_23303;hsa-miR-92a-1-5p;NC_000007.14_17821;NC_000012.12_25887;NC_000011.10_25384;NC_000004.12_9892;NC_000006.12_15769;hsa-miR-17-5p;hsa-miR-1257;hsa-miR-7-5p;NC_000011.10_25091;hsa-miR-519a-3p;hsa-miR-15b-3p;hsa-miR-3529-3p;NC_000003.12_7520;NC_000018.10_33037;hsa-miR-548d-3p;hsa-miR-302b-3p;hsa-miR-20a-5p;hsa-miR-520c-3p;hsa-miR-52…
ATP2B4	NONHSAT224112	0.573333	1.22195e-45	35	hsa-miR-371a-5p;hsa-miR-372-5p;hsa-miR-3155a;NC_000013.11_28441;hsa-miR-498;NC_000010.11_23303;hsa-miR-92a-1-5p;hsa-miR-629-3p;hsa-miR-3662;NC_000007.14_17821;NC_000003.12_8583;NC_000012.12_25887;hsa-miR-18a-3p;NC_000004.12_10500;NC_000006.12_15769;NC_000013.11_27627;hsa-miR-26a-1-3p;NC_000022.11_36437;hsa-miR-7-5p;NC_000003.12_9133;hsa-miR-512-3p;hsa-miR-5585-3p;NC_000007.14_16719;NC_000018.10_3…
NDRG1	ENST00000281092	0.195	1.22225e-45	30	hsa-miR-372-5p;hsa-miR-30c-1-3p;NC_000008.11_19445;NC_000010.11_23303;hsa-miR-675-5p;hsa-miR-629-3p;NC_000012.12_25887;NC_000011.10_25384;NC_000005.10_11919>NC_000005.10_11920;NC_000006.12_15769;hsa-miR-17-5p;NC_000013.11_27627;NC_000022.11_36372;hsa-miR-7-5p;NC_000011.10_25091;hsa-miR-3529-3p;hsa-miR-515-5p;NC_000003.12_7520;NC_000016.10_31157;hsa-miR-548d-3p;hsa-miR-302b-3p;hsa-miR-20a-5p;NC_00…
PSMD11	ENST00000281092	0.21	1.22225e-45	30	hsa-miR-33b-3p;NC_000006.12_14671;hsa-miR-372-5p;hsa-miR-30c-1-3p;hsa-miR-629-3p;NC_000012.12_25887;hsa-miR-18a-3p;NC_000005.10_11919>NC_000005.10_11920;NC_000006.12_15769;hsa-miR-17-5p;hsa-miR-34c-5p;NC_000022.11_36372;hsa-miR-7-5p;NC_000012.12_25503;hsa-miR-345-5p;hsa-miR-3529-3p;hsa-miR-515-5p;NC_000003.12_7520;hsa-miR-517a-3p>hsa-miR-517b-3p;hsa-miR-548d-3p;NC_000012.12_26721;NT_187601.1_3949…
MTMR9	lnc-POTED-16:1	0.603175	1.26192e-45	31	hsa-miR-1323;hsa-miR-372-5p;NC_000013.11_28441;NC_000008.11_19445;hsa-miR-3662;hsa-miR-27b-5p;NC_000012.12_25887;NC_000011.10_25384;NC_000004.12_9892;NC_000012.12_26286;hsa-miR-17-5p;hsa-miR-1257;hsa-miR-7-5p;NC_000012.12_25503;NC_000011.10_25091;hsa-miR-519a-3p;hsa-miR-15b-3p;hsa-miR-3529-3p;hsa-miR-515-5p;NC_000003.12_7520;NC_000018.10_33037;hsa-miR-548d-3p;hsa-miR-302b-3p;hsa-miR-20a-5p;hsa-mi…
KIF3A	NR_038921	0.49	1.26488e-45	31	hsa-miR-372-5p;hsa-miR-30c-1-3p;NC_000008.11_19445;NC_000012.12_25887;NC_000011.10_25384;NC_000004.12_9892;hsa-miR-302c-5p;NC_000006.12_15769;hsa-miR-17-5p;NC_000013.11_27627;NC_000022.11_36372;hsa-miR-26a-1-3p;NC_000003.12_7973;hsa-miR-515-5p;NC_000020.11_35116;NC_000016.10_31157;NC_000018.10_33037;hsa-miR-548d-3p;NT_187601.1_39493>NC_000014.9_29213;hsa-miR-20a-5p;hsa-miR-302b-3p;hsa-miR-3143;hs…
CREBRF	NR_033268	0.449541	1.27607e-45	36	hsa-miR-934;NC_000013.11_28441;hsa-miR-30c-1-3p;NC_000023.11_36905;hsa-miR-518b;hsa-miR-7974;NC_000007.14_17821;NC_000012.12_25887;hsa-miR-18a-3p;hsa-miR-302c-5p;NC_000006.12_15769;hsa-miR-17-5p;NC_000022.11_36372;NC_000005.10_14158;hsa-miR-26a-1-3p;hsa-miR-7-5p;NC_000001.11_3101;NC_000002.12_3238;NC_000011.10_25091;NC_000003.12_7520;NC_000020.11_35116;NC_000012.12_26414;hsa-miR-526b-5p;hsa-miR-2…
UBR3	lnc-POTED-16:1	0.587302	1.27999e-45	29	hsa-miR-1323;hsa-miR-372-5p;NC_000013.11_28441;NC_000010.11_23303;hsa-miR-92a-1-5p;NC_000012.12_25887;NC_000011.10_25384;NC_000004.12_9892;NC_000012.12_26286;NC_000006.12_15769;hsa-miR-17-5p;hsa-miR-1257;NC_000012.12_25503;NC_000011.10_25091;hsa-miR-15b-3p;hsa-miR-3529-3p;hsa-miR-515-5p;NC_000020.11_35116;NC_000018.10_33037;hsa-miR-302b-3p;hsa-miR-20a-5p;hsa-miR-3143;hsa-miR-582-5p;hsa-miR-520c-3…
NAB1	ENST00000237264	0.458824	1.29632e-45	32	NC_000001.11_2008;NC_000013.11_28441;NC_000005.10_12140;NC_000008.11_19445;hsa-miR-7974;hsa-miR-518e-5p>hsa-miR-519a-5p>hsa-miR-519b-5p>hsa-miR-519c-5p>hsa-miR-522-5p>hsa-miR-523-5p;hsa-miR-3662;hsa-miR-1298-5p;NC_000021.9_35751;NC_000012.12_25887;NC_000004.12_9892;hsa-miR-302c-5p;NC_000006.12_15769;hsa-miR-34c-5p;NC_000013.11_27627;hsa-miR-1257;hsa-miR-7-5p;NC_000002.12_3238;NC_000003.12_7973;NC…
MAP3K5	NONHSAT215932	0.319328	1.29632e-45	32	hsa-miR-33b-3p;NC_000013.11_28441;NC_000010.11_23303;hsa-miR-92a-1-5p;NC_000011.10_25384;NC_000005.10_11919>NC_000005.10_11920;hsa-miR-17-5p;hsa-miR-34c-5p;NC_000013.11_27627;hsa-miR-1257;NC_000005.10_14158;NC_000002.12_3238;NC_000003.12_9133;NC_000003.12_7973;NC_000011.10_25091;NC_000015.10_30316;hsa-miR-15b-3p;NC_000003.12_7520;NC_000009.12_21957;hsa-let-7c-5p;hsa-miR-296-3p;NT_187601.1_39493>N…
ASPH	ENST00000432045	0.5125	1.36485e-45	31	NC_000006.12_14671;hsa-miR-372-5p;hsa-miR-30c-1-3p;NC_000008.11_19445;hsa-miR-498;hsa-miR-629-3p;NC_000012.12_25887;NC_000009.12_21255;NC_000006.12_15769;hsa-miR-17-5p;hsa-miR-34c-5p;NC_000022.11_36372;hsa-miR-26a-1-3p;hsa-miR-1257;hsa-miR-7-5p;NC_000011.10_25091;hsa-miR-515-5p;NC_000003.12_7520;NC_000020.11_35116;hsa-miR-296-3p;NT_187601.1_39493>NC_000014.9_29213;hsa-miR-20a-5p;hsa-miR-302b-3p;h…
PHLDA1	NONHSAT224112	0.506667	1.3863e-45	33	hsa-miR-372-5p;hsa-miR-3155a;NC_000013.11_28441;NC_000008.11_19445;NC_000010.11_23303;hsa-miR-92a-1-5p;hsa-miR-629-3p;hsa-miR-3662;NC_000007.14_17821;NC_000003.12_8583;NC_000012.12_25887;hsa-miR-18a-3p;NC_000006.12_15769;NC_000013.11_27627;NC_000022.11_36372;NC_000022.11_36437;hsa-miR-345-5p;hsa-miR-92a-3p;NC_000020.11_35116;NC_000007.14_16719;NC_000018.10_33037;hsa-let-7c-5p;NC_000018.10_33504*;…
LAMB3	NR_033268	0.366972	1.63936e-45	33	hsa-miR-371a-5p;hsa-miR-372-5p;hsa-miR-3155a;hsa-miR-30c-1-3p;hsa-miR-371b-3p;hsa-miR-92a-1-5p;hsa-miR-518b;hsa-miR-7974;hsa-miR-629-3p;hsa-miR-1298-5p;hsa-miR-510-5p;hsa-miR-302a-5p;NC_000003.12_8583;NC_000021.9_35751;hsa-miR-18a-3p;NC_000012.12_25887;NC_000006.12_15769;NC_000022.11_36372;NC_000001.11_3101;NC_000002.12_3238;hsa-miR-520a-3p;NC_000011.10_25091;hsa-miR-302b-5p;NC_000020.11_35116;NC…
TAOK3	ENST00000261530	0.255102	1.69319e-45	32	NC_000006.12_14671;hsa-miR-1323;hsa-miR-30c-1-3p;NC_000023.11_36905;hsa-miR-92a-1-5p;hsa-miR-1298-5p;NC_000012.12_25887;NC_000011.10_25384;NC_000004.12_9892;hsa-miR-17-5p;NC_000013.11_27627;hsa-miR-1257;hsa-miR-7-5p;NC_000002.12_3238;NC_000012.12_25503;hsa-miR-519a-3p;hsa-miR-515-5p;hsa-miR-517a-3p>hsa-miR-517b-3p;hsa-miR-548d-3p;NT_187601.1_39493>NC_000014.9_29213;hsa-miR-20a-5p;NC_000007.14_170…
AHNAK2	ENST00000568777	0.602273	1.75057e-45	33	hsa-miR-934;hsa-miR-33b-3p;hsa-miR-372-5p;hsa-miR-30c-1-3p;hsa-miR-371b-3p;hsa-miR-92a-1-5p;NC_000003.12_7276;NC_000010.11_23646;NC_000012.12_25887;hsa-miR-18a-3p;hsa-miR-302c-5p;NC_000006.12_15769;hsa-miR-7-5p;NC_000001.11_3101;NC_000002.12_3238;NC_000012.12_25503;NC_000011.10_25091;hsa-miR-512-3p;hsa-miR-345-5p;NC_000020.11_35116;NC_000003.12_7520;NC_000012.12_26414;hsa-miR-526b-5p;hsa-miR-296-…
ADAM20	NR_034072	0.777778	1.78833e-45	33	hsa-miR-934;hsa-miR-372-5p;NC_000013.11_28441;hsa-miR-30c-1-3p;hsa-miR-371b-3p;hsa-miR-7974;hsa-miR-3662;hsa-miR-510-5p;NC_000012.12_25887;NC_000004.12_10500;NC_000011.10_25384;hsa-miR-302c-5p;NC_000006.12_15769;NC_000006.12_15809;hsa-miR-26a-1-3p;hsa-miR-7-5p;NC_000002.12_3238;NC_000012.12_25503;NC_000011.10_25091;hsa-miR-512-3p;hsa-miR-345-5p;hsa-miR-3529-3p;NC_000003.12_7520;NC_000012.12_26414…
VDR	ENST00000263967	0.260274	1.79941e-45	32	hsa-miR-934;hsa-miR-33b-3p;hsa-miR-372-5p;hsa-miR-498;hsa-miR-371b-3p;hsa-miR-92a-1-5p;hsa-miR-7974;hsa-miR-629-3p;hsa-miR-3662;NC_000012.12_25887;NC_000004.12_10500;NC_000011.10_25384;NC_000004.12_9892;NC_000005.10_11919>NC_000005.10_11920;hsa-miR-302c-5p;NC_000006.12_15769;NC_000013.11_27627;hsa-miR-26a-1-3p;hsa-miR-1257;NC_000002.12_3238;NC_000011.10_25091;hsa-miR-302b-5p;NC_000020.11_35116;hs…
VTI1A	NONHSAT217150	0.807692	1.81029e-45	34	hsa-miR-934;hsa-miR-33b-3p;hsa-miR-371a-5p;hsa-miR-372-5p;hsa-miR-3155a;NC_000013.11_28441;hsa-miR-30c-1-3p;hsa-miR-498;NC_000010.11_23303;hsa-miR-371b-3p;hsa-miR-629-3p;hsa-miR-3662;NC_000021.9_35751;NC_000004.12_10500;NC_000011.10_25384;NC_000005.10_11919>NC_000005.10_11920;hsa-miR-17-5p;NC_000022.11_36372;NC_000005.10_14158;hsa-miR-1257;NC_000002.12_3238;hsa-miR-520a-3p;NC_000015.10_30316;hsa-…
ZMYM6	NONHSAT215932	0.394958	2.05683e-45	33	hsa-miR-372-5p;NC_000013.11_28441;hsa-miR-30c-1-3p;hsa-miR-92a-1-5p;hsa-miR-7974;hsa-miR-518e-5p>hsa-miR-519a-5p>hsa-miR-519b-5p>hsa-miR-519c-5p>hsa-miR-522-5p>hsa-miR-523-5p;NC_000007.14_17821;NC_000010.11_23646;NC_000021.9_35751;NC_000011.10_25384;hsa-miR-302c-5p;hsa-miR-26a-1-3p;NC_000002.12_3238;NC_000003.12_9133;NC_000003.12_7973;NC_000008.11_20037*;hsa-miR-519a-3p;NC_000015.10_30316;hsa-miR…
ZMYM6	NR_038921	0.47	2.05683e-45	33	hsa-miR-372-5p;NC_000013.11_28441;hsa-miR-30c-1-3p;NC_000008.11_19445;hsa-miR-7974;hsa-miR-518e-5p>hsa-miR-519a-5p>hsa-miR-519b-5p>hsa-miR-519c-5p>hsa-miR-522-5p>hsa-miR-523-5p;hsa-miR-3662;NC_000007.14_17821;NC_000021.9_35751;NC_000011.10_25384;NC_000004.12_9892;hsa-miR-302c-5p;NC_000022.11_36372;hsa-miR-26a-1-3p;NC_000001.11_3101;NC_000002.12_3238;NC_000003.12_7973;NC_000015.10_30316;hsa-miR-51…
ZNF704	NONHSAT205276	0.79661	2.06805e-45	32	NC_000013.11_28441;NC_000023.11_36905;hsa-miR-92a-1-5p;hsa-miR-7974;NC_000003.12_7276;hsa-miR-3662;hsa-miR-510-5p;NC_000007.14_17821;NC_000021.9_35751;hsa-miR-302a-5p;NC_000011.10_25384;NC_000012.12_26286;NC_000006.12_15769;hsa-miR-34c-5p;NC_000013.11_27627;hsa-miR-1257;NC_000002.12_3238;NC_000003.12_9133;NC_000012.12_25503;NC_000011.10_25091;NC_000015.10_30316;NC_000016.10_31157;NC_000012.12_264…
NCOA7	NR_034072	0.603175	2.15365e-45	32	hsa-miR-934;hsa-miR-372-5p;NC_000013.11_28441;hsa-miR-30c-1-3p;hsa-miR-371b-3p;hsa-miR-3662;hsa-miR-510-5p;hsa-miR-302a-5p;NC_000012.12_25887;NC_000004.12_10500;NC_000011.10_25384;hsa-miR-302c-5p;NC_000006.12_15769;hsa-miR-17-5p;NC_000013.11_27627;hsa-miR-26a-1-3p;hsa-miR-7-5p;NC_000002.12_3238;NC_000012.12_25503;hsa-miR-512-3p;hsa-miR-3529-3p;hsa-miR-515-5p;NC_000012.12_26414;hsa-miR-526b-5p;hsa…
RBAK	NR_033268	0.40367	2.2067e-45	34	hsa-miR-934;hsa-miR-372-5p;hsa-miR-3155a;hsa-miR-30c-1-3p;hsa-miR-371b-3p;NC_000010.11_23303;hsa-miR-92a-1-5p;hsa-miR-629-3p;NC_000007.14_17821;hsa-miR-510-5p;hsa-miR-302a-5p;NC_000010.11_23646;NC_000021.9_35751;hsa-miR-18a-3p;NC_000012.12_26286;NC_000022.11_36372;hsa-miR-7-5p;NC_000001.11_3101;NC_000002.12_3238;NC_000011.10_25091;hsa-miR-302b-5p;NC_000003.12_7520;NC_000012.12_26414;NT_187601.1_3…
GPCPD1	ENST00000263967	0.39726	2.25953e-45	35	hsa-miR-33b-3p;hsa-miR-372-5p;NC_000013.11_28441;hsa-miR-30c-1-3p;hsa-miR-371b-3p;hsa-miR-7974;hsa-miR-3662;NC_000012.12_25887;NC_000004.12_10500;NC_000011.10_25384;hsa-miR-302c-5p;NC_000006.12_15769;hsa-miR-17-5p;NC_000013.11_27627;NC_000022.11_36437;hsa-miR-26a-1-3p;hsa-miR-1257;NC_000002.12_3238;hsa-miR-302b-5p;NC_000016.10_31157;NC_000018.10_33037;hsa-let-7c-5p;NC_000012.12_26721;hsa-miR-296-…
NMNAT1	ENST00000263967	0.335616	2.41075e-45	34	hsa-miR-372-5p;hsa-miR-30c-1-3p;hsa-miR-498;hsa-miR-92a-1-5p;hsa-miR-3662;NC_000010.11_23646;NC_000012.12_25887;NC_000004.12_10500;NC_000009.12_21255;hsa-miR-302c-5p;NC_000006.12_15769;hsa-miR-17-5p;hsa-miR-1257;hsa-miR-7-5p;NC_000002.12_3238;NC_000011.10_25091;NC_000015.10_30316;hsa-miR-302b-5p;NC_000020.11_35116;NC_000012.12_26414;hsa-let-7c-5p;NT_187601.1_39493>NC_000014.9_29213;hsa-miR-20a-5p…
NCOA3	lnc-POTED-16:1	0.603175	2.56472e-45	30	hsa-miR-1323;hsa-miR-372-5p;NC_000013.11_28441;NC_000008.11_19445;NC_000010.11_23303;hsa-miR-92a-1-5p;hsa-miR-3662;NC_000007.14_17821;NC_000012.12_25887;NC_000011.10_25384;NC_000004.12_9892;NC_000012.12_26286;NC_000006.12_15769;hsa-miR-17-5p;hsa-miR-519a-3p;hsa-miR-15b-3p;hsa-miR-3529-3p;hsa-miR-515-5p;NC_000003.12_7520;NC_000020.11_35116;NC_000018.10_33037;hsa-miR-548d-3p;hsa-miR-302b-3p;hsa-miR…
ADAM20	ENST00000563635	0.662162	2.60351e-45	35	hsa-miR-934;hsa-miR-33b-3p;NC_000006.12_14671;hsa-miR-372-5p;NC_000013.11_28441;hsa-miR-3155a;hsa-miR-518e-5p>hsa-miR-519a-5p>hsa-miR-519b-5p>hsa-miR-519c-5p>hsa-miR-522-5p>hsa-miR-523-5p;NC_000003.12_7276;hsa-miR-3662;NC_000007.14_17821;NC_000021.9_35751;NC_000003.12_8583;hsa-miR-18a-3p;NC_000012.12_25887;NC_000011.10_25384;hsa-miR-302c-5p;NC_000006.12_15769;NC_000022.11_36372;NC_000022.11_36437…
NCOA3	ENST00000432045	0.525	2.71819e-45	31	NC_000006.12_14671;hsa-miR-25-5p;hsa-miR-372-5p;hsa-miR-30c-1-3p;hsa-miR-498;NC_000008.11_19445;hsa-miR-629-3p;NC_000012.12_25887;hsa-miR-18a-3p;NC_000011.10_25384;NC_000004.12_9892;NC_000009.12_21255;NC_000006.12_15769;hsa-miR-17-5p;NC_000022.11_36372;hsa-miR-26a-1-3p;hsa-miR-515-5p;NC_000003.12_7520;NC_000020.11_35116;hsa-miR-548d-3p;hsa-miR-296-3p;hsa-miR-302b-3p;hsa-miR-20a-5p;hsa-miR-3143;hs…
GNE	NONHSAT217150	0.634615	2.72956e-45	31	hsa-miR-934;hsa-miR-3155a;NC_000013.11_28441;hsa-miR-30c-1-3p;NC_000010.11_23303;hsa-miR-629-3p;hsa-miR-3662;NC_000005.10_11919>NC_000005.10_11920;hsa-miR-17-5p;NC_000006.12_15809;NC_000022.11_36372;NC_000005.10_14158;hsa-miR-1257;NC_000001.11_3101;NC_000002.12_3238;NC_000003.12_9133;hsa-miR-520a-3p;NC_000008.11_20037*;NC_000011.10_25091;NC_000015.10_30316;hsa-miR-15b-3p;hsa-miR-5585-3p;hsa-miR-3…
SLC1A4	ENST00000261530	0.19898	2.76253e-45	35	hsa-miR-33b-3p;hsa-miR-25-5p;NC_000013.11_28441;hsa-miR-30c-1-3p;NC_000023.11_36905;hsa-miR-371b-3p;hsa-miR-92a-1-5p;hsa-miR-629-3p;NC_000003.12_7276;NC_000007.14_17821;NC_000010.11_23646;NC_000021.9_35751;NC_000011.10_25384;hsa-miR-17-5p;hsa-miR-34c-5p;hsa-miR-1257;hsa-miR-7-5p;NC_000001.11_3101;NC_000002.12_3238;NC_000003.12_7973;NC_000012.12_25503;hsa-miR-345-5p;NC_000003.12_7520;NC_000020.11_…
TIPARP	ENST00000261530	0.244898	2.76253e-45	35	hsa-miR-33b-3p;NC_000006.12_14671;hsa-miR-25-5p;hsa-miR-372-5p;NC_000008.11_19445;NC_000010.11_23303;hsa-miR-371b-3p;hsa-miR-629-3p;NC_000007.14_17821;hsa-miR-27b-5p;NC_000010.11_23646;hsa-miR-18a-3p;NC_000011.10_25384;NC_000018.10_33742;NC_000005.10_11919>NC_000005.10_11920;hsa-miR-17-5p;hsa-miR-1257;NC_000022.11_36437;hsa-miR-7-5p;NC_000001.11_3101;NC_000002.12_3238;hsa-miR-296-3p;NT_187601.1_3…
RHBDD1	NR_033268	0.440367	2.88302e-45	36	hsa-miR-371a-5p;NC_000013.11_28441;hsa-miR-30c-1-3p;NC_000023.11_36905;hsa-miR-92a-1-5p;hsa-miR-7974;hsa-miR-629-3p;NC_000003.12_7276;hsa-miR-510-5p;NC_000007.14_17821;hsa-miR-302a-5p;hsa-miR-18a-3p;hsa-miR-302c-5p;NC_000006.12_15769;NC_000022.11_36372;hsa-miR-26a-1-3p;hsa-miR-7-5p;NC_000002.12_3238;NC_000003.12_9133;hsa-miR-520a-3p;NC_000023.11_38289;hsa-miR-302b-5p;NC_000007.14_16719;NC_000009.…
ASPH	NONHSAT224112	0.533333	2.99814e-45	33	hsa-miR-372-5p;NC_000008.11_19445;hsa-miR-498;hsa-miR-92a-1-5p;hsa-miR-629-3p;hsa-miR-3662;NC_000003.12_8583;NC_000012.12_25887;NC_000004.12_10500;NC_000006.12_15769;NC_000013.11_27627;NC_000022.11_36372;hsa-miR-26a-1-3p;NC_000022.11_36437;hsa-miR-7-5p;hsa-miR-512-3p;hsa-miR-345-5p;NC_000020.11_35116;NC_000016.10_31157;NC_000018.10_33037;NT_187601.1_39493>NC_000014.9_29213;hsa-miR-302b-3p;NC_0000…
TLDC1	NONHSAT224112	0.48	2.99814e-45	33	hsa-miR-371a-5p;hsa-miR-3155a;NC_000008.11_19445;hsa-miR-498;NC_000010.11_23303;hsa-miR-92a-1-5p;hsa-miR-629-3p;NC_000003.12_8583;NC_000012.12_25887;hsa-miR-18a-3p;NC_000004.12_10500;NC_000006.12_15769;NC_000022.11_36372;NC_000022.11_36437;hsa-miR-7-5p;hsa-miR-520a-3p;hsa-miR-512-3p;hsa-miR-345-5p;hsa-miR-5585-3p;NC_000018.10_33037;hsa-miR-1284;NC_000018.10_33504*;NT_187601.1_39493>NC_000014.9_29…
TTN	NR_034072	0.777778	3.03337e-45	33	hsa-miR-934;hsa-miR-25-5p;hsa-miR-372-5p;NC_000013.11_28441;hsa-miR-30c-1-3p;hsa-miR-371b-3p;hsa-miR-7974;hsa-miR-3662;NC_000012.12_25887;NC_000004.12_10500;NC_000011.10_25384;hsa-miR-302c-5p;NC_000006.12_15769;hsa-miR-17-5p;hsa-miR-26a-1-3p;hsa-miR-7-5p;NC_000002.12_3238;NC_000011.10_25091;hsa-miR-345-5p;hsa-miR-3529-3p;NC_000003.12_7520;NC_000012.12_26414;hsa-miR-526b-5p;hsa-miR-296-3p;NT_18760…
KIF3A	ENST00000395116	0.72	3.37762e-45	27	hsa-miR-33b-3p;hsa-miR-498;hsa-miR-629-3p;NC_000012.12_25887;NC_000011.10_25384;NC_000004.12_9892;hsa-miR-17-5p;NC_000013.11_27627;hsa-miR-26a-1-3p;hsa-miR-7-5p;NC_000003.12_7973;hsa-miR-515-5p;NC_000012.12_26414;NC_000018.10_33037;hsa-miR-548d-3p;hsa-miR-302b-3p;hsa-miR-20a-5p;hsa-miR-3143;hsa-miR-582-5p;hsa-miR-520c-3p;hsa-miR-373-5p;hsa-miR-522-3p;NC_000005.10_12588;hsa-miR-573;hsa-miR-205-5p;…
LACC1	ENST00000281092	0.23	3.38711e-45	31	hsa-miR-33b-3p;hsa-miR-372-5p;hsa-miR-30c-1-3p;hsa-miR-498;NC_000010.11_23303;hsa-miR-92a-1-5p;hsa-miR-629-3p;NC_000012.12_25887;NC_000011.10_25384;NC_000004.12_9892;NC_000006.12_15769;hsa-miR-34c-5p;NC_000013.11_27627;NC_000022.11_36372;hsa-miR-26a-1-3p;NC_000002.12_3238;NC_000008.11_20037*;NC_000011.10_25091;hsa-miR-345-5p;hsa-miR-3529-3p;NC_000016.10_31157;NC_000012.12_26414;NC_000012.12_26721…
ADAM20	NONHSAT205276	0.728814	3.46668e-45	32	hsa-miR-372-5p;NC_000013.11_28441;NC_000023.11_36905;hsa-miR-92a-1-5p;hsa-miR-7974;hsa-miR-518e-5p>hsa-miR-519a-5p>hsa-miR-519b-5p>hsa-miR-519c-5p>hsa-miR-522-5p>hsa-miR-523-5p;NC_000003.12_7276;hsa-miR-3662;NC_000007.14_17821;hsa-miR-510-5p;NC_000021.9_35751;NC_000011.10_25384;NC_000012.12_26286;NC_000006.12_15769;hsa-miR-34c-5p;hsa-miR-1257;NC_000002.12_3238;NC_000003.12_9133;NC_000018.10_33480…
LCOR	ENST00000395116	0.78	3.60075e-45	29	hsa-miR-25-5p;hsa-miR-629-3p;NC_000012.12_25887;NC_000011.10_25384;NC_000004.12_9892;hsa-miR-17-5p;NC_000013.11_27627;hsa-miR-1257;hsa-miR-26a-1-3p;hsa-miR-7-5p;NC_000008.11_20037*;NC_000003.12_7973;NC_000011.10_25091;hsa-miR-515-5p;NC_000012.12_26414;NC_000018.10_33037;hsa-miR-548d-3p;hsa-miR-302b-3p;hsa-miR-20a-5p;hsa-miR-3143;hsa-miR-582-5p;hsa-miR-520c-3p;hsa-miR-373-5p;hsa-miR-522-3p;NC_0000…
IARS	NONHSAT215932	0.310924	3.84204e-45	31	hsa-miR-33b-3p;hsa-miR-372-5p;hsa-miR-30c-1-3p;hsa-miR-498;hsa-miR-92a-1-5p;NC_000007.14_17821;NC_000010.11_23646;NC_000012.12_25887;NC_000011.10_25384;NC_000006.12_15769;hsa-miR-17-5p;hsa-miR-34c-5p;NC_000005.10_14158;hsa-miR-1257;NC_000008.11_20037*;NC_000003.12_9133;NC_000015.10_30316;NC_000003.12_7520;NC_000020.11_35116;NC_000012.12_26414;hsa-let-7c-5p;hsa-miR-296-3p;NT_187601.1_39493>NC_0000…
RNF6	ENST00000263967	0.287671	3.88403e-45	31	hsa-miR-934;hsa-miR-33b-3p;NC_000013.11_28441;hsa-miR-92a-1-5p;hsa-miR-7974;NC_000011.10_25384;NC_000018.10_33742;NC_000005.10_11919>NC_000005.10_11920;NC_000009.12_21255;hsa-miR-302c-5p;NC_000006.12_15769;hsa-miR-17-5p;NC_000013.11_27627;hsa-miR-26a-1-3p;NC_000002.12_3238;NC_000011.10_25091;hsa-miR-519a-3p;hsa-miR-345-5p;NC_000020.11_35116;NC_000012.12_26721;NT_187601.1_39493>NC_000014.9_29213;h…
VCPIP1	NR_034072	0.603175	3.90336e-45	30	hsa-miR-934;hsa-miR-1323;hsa-miR-372-5p;hsa-miR-30c-1-3p;hsa-miR-7974;NC_000012.12_25887;NC_000011.10_25384;hsa-miR-302c-5p;NC_000006.12_15769;hsa-miR-17-5p;NC_000013.11_27627;hsa-miR-26a-1-3p;hsa-miR-7-5p;NC_000002.12_3238;NC_000012.12_25503;NC_000011.10_25091;hsa-miR-345-5p;hsa-miR-3529-3p;hsa-miR-515-5p;NC_000003.12_7520;hsa-miR-296-3p;NT_187601.1_39493>NC_000014.9_29213;hsa-miR-20a-5p;hsa-miR…
CPEB2	NR_034072	0.603175	3.90565e-45	32	hsa-miR-934;hsa-miR-1323;hsa-miR-25-5p;NC_000013.11_28441;hsa-miR-30c-1-3p;hsa-miR-371b-3p;hsa-miR-7974;hsa-miR-3662;hsa-miR-302a-5p;NC_000011.10_25384;hsa-miR-302c-5p;hsa-miR-17-5p;NC_000006.12_15809;hsa-miR-26a-1-3p;hsa-miR-7-5p;NC_000002.12_3238;NC_000012.12_25503;NC_000011.10_25091;hsa-miR-3529-3p;hsa-miR-515-5p;NC_000003.12_7520;NC_000012.12_26414;hsa-miR-526b-5p;NT_187601.1_39493>NC_000014.…
AHNAK2	ENST00000237264	0.494118	4.25607e-45	34	hsa-miR-33b-3p;NC_000006.12_14671;NC_000005.10_12140;hsa-miR-92a-1-5p;hsa-miR-7974;hsa-miR-3662;hsa-miR-510-5p;hsa-miR-27b-5p;NC_000012.12_25887;hsa-miR-18a-3p;NC_000011.10_25384;hsa-miR-302c-5p;NC_000006.12_15769;NC_000006.12_15809;NC_000013.11_27627;NC_000022.11_36372;NC_000022.11_36437;hsa-miR-1257;hsa-miR-7-5p;NC_000001.11_3101;NC_000002.12_3238;NC_000020.11_35116;NC_000012.12_26414;NC_000018…
CPEB4	ENST00000237264	0.635294	4.25607e-45	34	NC_000008.11_19445;NC_000005.10_12588;hsa-miR-675-5p;hsa-miR-92a-1-5p;hsa-miR-7974;hsa-miR-3662;hsa-miR-1298-5p;hsa-miR-27b-5p;NC_000012.12_25887;NC_000011.10_25384;hsa-miR-302c-5p;NC_000006.12_15769;hsa-miR-34c-5p;NC_000013.11_27627;hsa-miR-26a-1-3p;hsa-miR-1257;NC_000002.12_3238;NC_000003.12_7973;hsa-miR-519a-3p;NC_000020.11_35116;NC_000012.12_26414;NC_000018.10_33037;hsa-miR-548d-3p;NC_000012.…
ANK2	NONHSAT123764	0.647059	4.39289e-45	34	NC_000006.12_14671;hsa-miR-372-5p;NC_000013.11_28441;hsa-miR-30c-1-3p;NC_000005.10_12140;hsa-miR-371b-3p;hsa-miR-7974;NC_000003.12_7276;NC_000003.12_8583;NC_000021.9_35751;NC_000004.12_10500;NC_000011.10_25384;hsa-miR-302c-5p;hsa-miR-17-5p;NC_000013.11_27627;NC_000022.11_36372;NC_000022.11_36437;hsa-miR-1257;NC_000002.12_3238;NC_000003.12_7973;NC_000018.10_33480;NC_000015.10_30316;hsa-miR-15b-3p;…
ZNF701	ENST00000281092	0.26	4.52322e-45	32	hsa-miR-30c-1-3p;hsa-miR-92a-1-5p;hsa-miR-629-3p;NC_000012.12_25887;hsa-miR-18a-3p;NC_000011.10_25384;hsa-miR-302c-5p;NC_000012.12_26286;NC_000006.12_15769;NC_000006.12_15809;NC_000022.11_36372;hsa-miR-1257;hsa-miR-7-5p;NC_000008.11_20037*;NC_000003.12_7973;NC_000012.12_25503;hsa-miR-345-5p;hsa-miR-3529-3p;NC_000020.11_35116;NC_000012.12_26414;hsa-miR-296-3p;NT_187601.1_39493>NC_000014.9_29213;hs…
TMEM156	NONHSAT215932	0.378151	4.84193e-45	33	hsa-miR-372-5p;NC_000013.11_28441;hsa-miR-30c-1-3p;NC_000023.11_36905;hsa-miR-7974;NC_000007.14_17821;NC_000021.9_35751;NC_000012.12_25887;NC_000011.10_25384;NC_000005.10_11919>NC_000005.10_11920;NC_000012.12_26286;NC_000006.12_15769;hsa-miR-17-5p;hsa-miR-34c-5p;NC_000013.11_27627;NC_000005.10_14158;hsa-miR-1257;NC_000002.12_3238;NC_000008.11_20037*;NC_000015.10_30316;hsa-miR-15b-3p;NC_000016.10_…
TTBK2	NONHSAT215932	0.521008	5.21404e-45	35	hsa-miR-934;hsa-miR-33b-3p;hsa-miR-372-5p;hsa-miR-30c-1-3p;NC_000023.11_36905;NC_000010.11_23303;hsa-miR-92a-1-5p;hsa-miR-7974;hsa-miR-518e-5p>hsa-miR-519a-5p>hsa-miR-519b-5p>hsa-miR-519c-5p>hsa-miR-522-5p>hsa-miR-523-5p;NC_000007.14_17821;NC_000012.12_25887;NC_000011.10_25384;NC_000005.10_11919>NC_000005.10_11920;hsa-miR-302c-5p;NC_000006.12_15769;hsa-miR-34c-5p;NC_000005.10_14158;hsa-miR-26a-1-…
MEF2A	NONHSAT123764	0.602941	5.27484e-45	32	NC_000006.12_14671;hsa-miR-372-5p;NC_000013.11_28441;hsa-miR-30c-1-3p;NC_000005.10_12140;hsa-miR-371b-3p;NC_000003.12_7276;NC_000003.12_8583;NC_000021.9_35751;NC_000011.10_25384;NC_000009.12_21255;hsa-miR-302c-5p;hsa-miR-17-5p;NC_000013.11_27627;NC_000022.11_36372;hsa-miR-1257;NC_000022.11_36437;NC_000002.12_3238;NC_000003.12_7973;NC_000018.10_33480;hsa-miR-519a-3p;hsa-miR-512-3p;NC_000018.10_330…
CPEB4	ENST00000432045	0.675	5.32887e-45	31	hsa-miR-25-5p;hsa-miR-372-5p;hsa-miR-30c-1-3p;hsa-miR-498;NC_000008.11_19445;NC_000003.12_7276;hsa-miR-629-3p;NC_000012.12_25887;NC_000011.10_25384;NC_000009.12_21255;NC_000006.12_15769;hsa-miR-34c-5p;hsa-miR-26a-1-3p;hsa-miR-1257;NC_000011.10_25091;NC_000020.11_35116;hsa-miR-548d-3p;NC_000012.12_26721;hsa-miR-296-3p;hsa-miR-302b-3p;hsa-miR-20a-5p;hsa-miR-3143;hsa-miR-582-5p;hsa-miR-520c-3p;hsa-m…
GPCPD1	ENST00000261530	0.316327	5.42564e-45	37	hsa-miR-33b-3p;hsa-miR-25-5p;hsa-miR-372-5p;NC_000013.11_28441;hsa-miR-30c-1-3p;NC_000008.11_19445;NC_000023.11_36905;hsa-miR-371b-3p;NC_000012.12_25887;hsa-miR-18a-3p;NC_000011.10_25384;hsa-miR-302c-5p;hsa-miR-17-5p;hsa-miR-34c-5p;NC_000006.12_15809;NC_000013.11_27627;NC_000022.11_36437;NC_000005.10_14158;hsa-miR-1257;hsa-miR-26a-1-3p;NC_000001.11_3101;NC_000002.12_3238;NC_000003.12_7973;hsa-miR…
PRKG2	ENST00000263967	0.383562	5.50987e-45	34	hsa-miR-372-5p;NC_000013.11_28441;hsa-miR-30c-1-3p;hsa-miR-371b-3p;hsa-miR-92a-1-5p;hsa-miR-7974;hsa-miR-629-3p;hsa-miR-3662;NC_000007.14_17821;NC_000010.11_23646;NC_000012.12_25887;NC_000004.12_10500;NC_000005.10_11919>NC_000005.10_11920;hsa-miR-302c-5p;NC_000006.12_15769;NC_000013.11_27627;NC_000022.11_36437;hsa-miR-26a-1-3p;NC_000002.12_3238;hsa-miR-15b-3p;hsa-miR-302b-5p;hsa-miR-345-5p;NC_000…
SLC1A4	NR_033268	0.330275	5.88505e-45	34	hsa-miR-3155a;NC_000013.11_28441;NC_000009.12_20733;hsa-miR-30c-1-3p;NC_000023.11_36905;hsa-miR-371b-3p;hsa-miR-92a-1-5p;hsa-miR-7974;hsa-miR-629-3p;NC_000003.12_7276;NC_000007.14_17821;hsa-miR-302a-5p;NC_000021.9_35751;NC_000010.11_23646;NC_000003.12_8583;hsa-miR-17-5p;hsa-miR-7-5p;NC_000001.11_3101;NC_000002.12_3238;NC_000003.12_9133;NC_000011.10_25091;hsa-miR-512-3p;hsa-miR-345-5p;NC_000003.12…
PIK3CA	ENST00000281092	0.315	6.12554e-45	38	hsa-miR-934;hsa-miR-33b-3p;hsa-miR-372-5p;hsa-miR-30c-1-3p;hsa-miR-371b-3p;hsa-miR-92a-1-5p;hsa-miR-629-3p;NC_000012.12_25887;NC_000011.10_25384;NC_000005.10_11919>NC_000005.10_11920;hsa-miR-302c-5p;NC_000006.12_15769;hsa-miR-17-5p;NC_000013.11_27627;hsa-miR-26a-1-3p;hsa-miR-1257;hsa-miR-7-5p;NC_000002.12_3238;NC_000011.10_25091;hsa-miR-15b-3p;hsa-miR-345-5p;NC_000003.12_7520;NC_000020.11_35116;N…
PSMD11	ENST00000261530	0.204082	6.31323e-45	30	hsa-miR-33b-3p;NC_000006.12_14671;hsa-miR-372-5p;hsa-miR-30c-1-3p;NC_000023.11_36905;hsa-miR-629-3p;NC_000012.12_25887;hsa-miR-18a-3p;NC_000005.10_11919>NC_000005.10_11920;hsa-miR-17-5p;hsa-miR-34c-5p;hsa-miR-7-5p;NC_000012.12_25503;hsa-miR-519a-3p;hsa-miR-345-5p;hsa-miR-3529-3p;hsa-miR-515-5p;NC_000003.12_7520;hsa-miR-517a-3p>hsa-miR-517b-3p;hsa-miR-548d-3p;NT_187601.1_39493>NC_000014.9_29213;hs…
SLCO1B3	ENST00000261530	0.204082	6.31323e-45	30	hsa-miR-33b-3p;NC_000008.11_19445;hsa-miR-498;hsa-miR-92a-1-5p;NC_000003.12_7276;NC_000012.12_25887;hsa-miR-302c-5p;hsa-miR-17-5p;hsa-miR-1257;hsa-miR-26a-1-3p;NC_000002.12_3238;NC_000003.12_7973;hsa-miR-519a-3p;NC_000015.10_30316;hsa-miR-345-5p;NC_000003.12_7520;NC_000012.12_26414;hsa-miR-548d-3p;hsa-miR-302b-3p;hsa-miR-20a-5p;NC_000007.14_17077;hsa-miR-3143;hsa-miR-582-5p;hsa-miR-520c-3p;hsa-mi…
KDM7A	NR_033268	0.422018	6.38726e-45	36	hsa-miR-934;hsa-miR-3155a;NC_000009.12_20733;NC_000010.11_23303;hsa-miR-92a-1-5p;hsa-miR-629-3p;NC_000007.14_17821;NC_000010.11_23646;NC_000021.9_35751;NC_000012.12_25887;hsa-miR-18a-3p;hsa-miR-302c-5p;NC_000006.12_15769;hsa-miR-17-5p;NC_000022.11_36372;hsa-miR-26a-1-3p;NC_000005.10_14158;hsa-miR-7-5p;NC_000002.12_3238;NC_000003.12_9133;hsa-miR-512-3p;hsa-miR-345-5p;NC_000003.12_7520;hsa-miR-526b…
DMXL2	ENST00000432045	0.6125	7.15066e-45	29	hsa-miR-372-5p;hsa-miR-30c-1-3p;NC_000008.11_19445;hsa-miR-498;NC_000003.12_7276;NC_000012.12_25887;NC_000011.10_25384;NC_000006.12_15769;hsa-miR-17-5p;hsa-miR-34c-5p;hsa-miR-26a-1-3p;hsa-miR-1257;NC_000008.11_20037*;NC_000011.10_25091;hsa-miR-515-5p;NC_000003.12_7520;NC_000020.11_35116;hsa-miR-548d-3p;hsa-miR-296-3p;hsa-miR-302b-3p;hsa-miR-20a-5p;hsa-miR-3143;hsa-miR-582-5p;hsa-miR-520c-3p;hsa-m…
LYST	lnc-C6orf228-2:1	0.792453	7.43878e-45	32	NC_000006.12_14671;hsa-miR-372-5p;NC_000013.11_28441;hsa-miR-518e-5p>hsa-miR-519a-5p>hsa-miR-519b-5p>hsa-miR-519c-5p>hsa-miR-522-5p>hsa-miR-523-5p;hsa-miR-629-3p;NC_000012.12_25887;NC_000003.12_8583;NC_000009.12_21255;NC_000006.12_15769;hsa-miR-17-5p;hsa-miR-34c-5p;NC_000003.12_7973;NC_000018.10_33480;NC_000015.10_30316;hsa-miR-512-3p;NC_000007.14_16719;NC_000016.10_31157;NC_000012.12_26414;NC_00…
PNPLA8	ENST00000261530	0.321429	7.48915e-45	35	hsa-miR-33b-3p;NC_000006.12_14671;hsa-miR-372-5p;NC_000013.11_28441;hsa-miR-30c-1-3p;hsa-miR-498;hsa-miR-371b-3p;hsa-miR-27b-5p;NC_000010.11_23646;NC_000021.9_35751;NC_000011.10_25384;NC_000018.10_33742;hsa-miR-302c-5p;hsa-miR-17-5p;hsa-miR-34c-5p;NC_000013.11_27627;NC_000022.11_36437;NC_000002.12_3238;NC_000003.12_7973;hsa-miR-519a-3p;hsa-miR-345-5p;NC_000003.12_7520;NC_000018.10_33037;hsa-miR-2…
ADAM20	NONHSAT219565	0.735849	7.555e-45	33	hsa-miR-934;NC_000006.12_14671;NC_000013.11_28441;NC_000009.12_20733;NC_000023.11_36905;hsa-miR-3662;hsa-miR-510-5p;NC_000003.12_8583;NC_000011.10_25384;NC_000009.12_21255;hsa-miR-34c-5p;NC_000022.11_36372;NC_000002.12_3238;NC_000003.12_9133;NC_000018.10_33480;NC_000012.12_25503;NC_000011.10_25091;NC_000023.11_38289;hsa-miR-302b-5p;NC_000003.12_7520;NC_000016.10_31157;hsa-let-7c-5p;NT_187601.1_39…
DNAJC10	ENST00000563635	0.486486	7.79069e-45	31	hsa-miR-934;NC_000006.12_14671;hsa-miR-372-5p;NC_000013.11_28441;NC_000008.11_19445;hsa-miR-498;NC_000005.10_12588;NC_000003.12_7276;NC_000007.14_17821;NC_000012.12_25887;hsa-miR-18a-3p;NC_000011.10_25384;NC_000004.12_9892;hsa-miR-302c-5p;NC_000006.12_15769;hsa-miR-17-5p;NC_000022.11_36372;hsa-miR-26a-1-3p;hsa-miR-519a-3p;NC_000015.10_30316;hsa-miR-548d-3p;hsa-miR-302b-3p;hsa-miR-20a-5p;hsa-miR-5…
INHBA	ENST00000563635	0.540541	7.79069e-45	31	hsa-miR-934;hsa-miR-33b-3p;hsa-miR-372-5p;NC_000013.11_28441;NC_000008.11_19445;NC_000003.12_8135;NC_000003.12_7276;NC_000007.14_17821;NC_000012.12_25887;NC_000021.9_35751;hsa-miR-18a-3p;NC_000004.12_9892;hsa-miR-302c-5p;NC_000006.12_15769;hsa-miR-17-5p;NC_000022.11_36372;hsa-miR-26a-1-3p;NC_000001.11_3101;NC_000008.11_20037*;hsa-miR-519a-3p;hsa-miR-3529-3p;hsa-miR-296-3p;hsa-miR-302b-3p;hsa-miR-…
CPPED1	ENST00000395116	0.64	8.15259e-45	27	hsa-miR-498;hsa-miR-629-3p;NC_000012.12_25887;hsa-miR-18a-3p;NC_000011.10_25384;NC_000004.12_9892;hsa-miR-17-5p;NC_000013.11_27627;hsa-miR-1257;hsa-miR-26a-1-3p;hsa-miR-7-5p;NC_000003.12_7973;hsa-miR-515-5p;NC_000012.12_26414;NC_000018.10_33037;hsa-miR-548d-3p;hsa-miR-3619-5p;hsa-miR-302b-3p;hsa-miR-20a-5p;hsa-miR-582-5p;hsa-miR-520c-3p;hsa-miR-373-5p;hsa-miR-522-3p;NC_000005.10_12588;hsa-miR-573…
FAM63B	NR_038921	0.43	8.3687e-45	30	NC_000001.11_2008;hsa-miR-25-5p;hsa-miR-372-5p;hsa-miR-30c-1-3p;NC_000007.14_17821;NC_000012.12_25887;NC_000011.10_25384;NC_000005.10_11919>NC_000005.10_11920;NC_000004.12_9892;NC_000009.12_21255;NC_000012.12_26286;NC_000006.12_15769;hsa-miR-17-5p;NC_000013.11_27627;NC_000022.11_36372;hsa-miR-1257;NC_000003.12_7973;hsa-miR-515-5p;NC_000020.11_35116;hsa-miR-548d-3p;hsa-miR-302b-3p;hsa-miR-20a-5p;h…
OCLN	NONHSAT215932	0.344538	8.8818e-45	32	NC_000013.11_28441;hsa-miR-30c-1-3p;hsa-miR-92a-1-5p;NC_000007.14_17821;NC_000010.11_23646;NC_000011.10_25384;hsa-miR-17-5p;hsa-miR-34c-5p;NC_000013.11_27627;hsa-miR-26a-1-3p;NC_000005.10_14158;NC_000008.11_20037*;NC_000003.12_9133;NC_000003.12_7973;hsa-miR-519a-3p;NC_000015.10_30316;hsa-miR-15b-3p;NC_000003.12_7520;NC_000016.10_31157;hsa-let-7c-5p;NT_187601.1_39493>NC_000014.9_29213;hsa-miR-20a-…
RHBDD1	NONHSAT215932	0.369748	9.00281e-45	34	NC_000013.11_28441;hsa-miR-30c-1-3p;NC_000023.11_36905;hsa-miR-92a-1-5p;hsa-miR-7974;NC_000007.14_17821;NC_000011.10_25384;hsa-miR-302c-5p;NC_000006.12_15769;hsa-miR-34c-5p;NC_000013.11_27627;hsa-miR-26a-1-3p;hsa-miR-1257;NC_000002.12_3238;NC_000003.12_9133;NC_000003.12_7973;NC_000015.10_30316;hsa-miR-15b-3p;NC_000009.12_21957;NC_000012.12_26414;NC_000016.10_31157;hsa-let-7c-5p;hsa-miR-296-3p;NT_…
GNE	NONHSAT215932	0.386555	9.00281e-45	34	hsa-miR-934;NC_000013.11_28441;hsa-miR-30c-1-3p;NC_000010.11_23303;hsa-miR-92a-1-5p;NC_000007.14_17821;NC_000010.11_23646;NC_000012.12_25887;NC_000005.10_11919>NC_000005.10_11920;hsa-miR-302c-5p;NC_000006.12_15769;hsa-miR-17-5p;hsa-miR-34c-5p;NC_000013.11_27627;hsa-miR-1257;NC_000005.10_14158;NC_000002.12_3238;NC_000003.12_9133;NC_000003.12_7973;NC_000008.11_20037*;NC_000011.10_25091;NC_000015.10…
GNE	NR_038921	0.41	9.00281e-45	34	hsa-miR-25-5p;NC_000013.11_28441;hsa-miR-30c-1-3p;hsa-miR-3662;NC_000007.14_17821;hsa-miR-1298-5p;NC_000012.12_25887;NC_000005.10_11919>NC_000005.10_11920;NC_000009.12_21255;hsa-miR-302c-5p;NC_000006.12_15769;hsa-miR-17-5p;NC_000006.12_15809;NC_000013.11_27627;NC_000022.11_36372;hsa-miR-1257;NC_000001.11_3101;NC_000002.12_3238;NC_000003.12_7973;hsa-miR-512-3p;NC_000015.10_30316;hsa-miR-515-5p;NC_…
GFPT1	NONHSAT217150	0.653846	9.16838e-45	32	hsa-miR-934;hsa-miR-33b-3p;hsa-miR-371a-5p;hsa-miR-372-5p;hsa-miR-3155a;hsa-miR-30c-1-3p;hsa-miR-498;hsa-miR-371b-3p;hsa-miR-629-3p;hsa-miR-3662;hsa-miR-27b-5p;NC_000005.10_11919>NC_000005.10_11920;hsa-miR-17-5p;NC_000006.12_15809;NC_000022.11_36372;NC_000001.11_3101;NC_000008.11_20037*;NC_000003.12_9133;hsa-miR-520a-3p;NC_000011.10_25091;NC_000015.10_30316;hsa-miR-15b-3p;NC_000016.10_31157;hsa-m…
MXD1	NONHSAT217150	0.692308	9.76481e-45	31	hsa-miR-33b-3p;hsa-miR-371a-5p;hsa-miR-3155a;NC_000013.11_28441;hsa-miR-30c-1-3p;NC_000010.11_23303;hsa-miR-371b-3p;hsa-miR-629-3p;hsa-miR-3662;NC_000004.12_10500;NC_000011.10_25384;NC_000005.10_11919>NC_000005.10_11920;hsa-miR-17-5p;NC_000006.12_15809;NC_000022.11_36372;hsa-miR-1257;NC_000001.11_3101;NC_000002.12_3238;NC_000003.12_9133;hsa-miR-520a-3p;NC_000011.10_25091;hsa-miR-15b-3p;hsa-miR-55…
TGFA	NR_033268	0.330275	9.76481e-45	31	hsa-miR-3155a;NC_000009.12_20733;hsa-miR-371b-3p;NC_000010.11_23303;hsa-miR-92a-1-5p;hsa-miR-518e-5p>hsa-miR-519a-5p>hsa-miR-519b-5p>hsa-miR-519c-5p>hsa-miR-522-5p>hsa-miR-523-5p;hsa-miR-629-3p;NC_000003.12_7276;NC_000007.14_17821;NC_000010.11_23646;NC_000021.9_35751;NC_000003.12_8583;NC_000012.12_25887;hsa-miR-302c-5p;NC_000012.12_26286;NC_000006.12_15769;NC_000005.10_14158;hsa-miR-7-5p;NC_00000…
MGEA5	ENST00000263967	0.349315	9.88685e-45	35	hsa-miR-934;hsa-miR-372-5p;NC_000013.11_28441;hsa-miR-371b-3p;hsa-miR-92a-1-5p;hsa-miR-7974;hsa-miR-629-3p;hsa-miR-3662;NC_000007.14_17821;NC_000012.12_25887;NC_000004.12_10500;NC_000018.10_33742;NC_000006.12_15769;hsa-miR-17-5p;NC_000022.11_36437;hsa-miR-26a-1-3p;hsa-miR-1257;hsa-miR-7-5p;NC_000002.12_3238;NC_000011.10_25091;NC_000003.12_7520;NC_000018.10_33037;hsa-let-7c-5p;hsa-miR-296-3p;hsa-m…
MBNL2	ENST00000281092	0.24	9.98971e-45	29	hsa-miR-372-5p;hsa-miR-30c-1-3p;NC_000008.11_19445;hsa-miR-629-3p;NC_000012.12_25887;hsa-miR-18a-3p;NC_000011.10_25384;NC_000006.12_15769;NC_000013.11_27627;NC_000022.11_36372;hsa-miR-1257;hsa-miR-7-5p;NC_000008.11_20037*;NC_000011.10_25091;hsa-miR-3529-3p;NC_000020.11_35116;hsa-miR-517a-3p>hsa-miR-517b-3p;NC_000012.12_26414;NT_187601.1_39493>NC_000014.9_29213;hsa-miR-302b-3p;hsa-miR-3143;hsa-miR…
KALRN	ENST00000588258	0.96875	1.01534e-44	25	hsa-miR-4443;NC_000010.11_22861;hsa-miR-26b-5p;NC_000009.12_21531;hsa-miR-664a-5p;hsa-miR-148a-3p;hsa-miR-9-5p;NC_000012.12_26540;hsa-miR-155-5p;hsa-miR-22-5p;hsa-miR-193a-5p;hsa-miR-378d;NC_000011.10_24785;NC_000017.11_32431;hsa-miR-328-3p;hsa-miR-449c-5p;NC_000020.11_34751;hsa-miR-4435;hsa-miR-181a-5p;hsa-miR-24-3p;hsa-miR-6807-5p;hsa-miR-215-3p;hsa-miR-6842-3p;NC_000019.10_34428;hsa-miR-3929
CTH	ENST00000263967	0.287671	1.03891e-44	33	NC_000013.11_28441;hsa-miR-30c-1-3p;hsa-miR-371b-3p;hsa-miR-92a-1-5p;hsa-miR-7974;hsa-miR-629-3p;hsa-miR-3662;NC_000007.14_17821;NC_000004.12_10500;NC_000011.10_25384;NC_000004.12_9892;hsa-miR-302c-5p;NC_000006.12_15769;hsa-miR-17-5p;NC_000013.11_27627;hsa-miR-1257;hsa-miR-519a-3p;hsa-miR-345-5p;NC_000003.12_7520;hsa-miR-296-3p;NT_187601.1_39493>NC_000014.9_29213;hsa-miR-20a-5p;NC_000007.14_17077…
GRB10	ENST00000263967	0.342466	1.13016e-44	36	hsa-miR-33b-3p;hsa-miR-372-5p;hsa-miR-30c-1-3p;hsa-miR-92a-1-5p;hsa-miR-7974;hsa-miR-3662;NC_000010.11_23646;NC_000012.12_25887;NC_000004.12_10500;NC_000011.10_25384;NC_000005.10_11919>NC_000005.10_11920;hsa-miR-302c-5p;NC_000006.12_15769;NC_000022.11_36437;hsa-miR-26a-1-3p;hsa-miR-1257;hsa-miR-7-5p;NC_000002.12_3238;NC_000011.10_25091;hsa-miR-302b-5p;hsa-miR-345-5p;NC_000003.12_7520;NC_000020.11…
PHLDA1	NR_033268	0.376147	1.13025e-44	35	hsa-miR-372-5p;hsa-miR-3155a;NC_000013.11_28441;NC_000009.12_20733;hsa-miR-30c-1-3p;NC_000010.11_23303;hsa-miR-92a-1-5p;hsa-miR-7974;hsa-miR-629-3p;NC_000003.12_7276;NC_000007.14_17821;hsa-miR-510-5p;NC_000003.12_8583;NC_000010.11_23646;hsa-miR-18a-3p;NC_000012.12_25887;NC_000012.12_26286;hsa-miR-17-5p;NC_000006.12_15769;NC_000022.11_36372;NC_000002.12_3238;hsa-miR-302b-5p;hsa-miR-345-5p;NC_00002…
ARHGAP5	ENST00000395116	0.7	1.1377e-44	28	hsa-miR-498;NC_000012.12_25887;hsa-miR-18a-3p;NC_000011.10_25384;NC_000004.12_9892;hsa-miR-17-5p;NC_000013.11_27627;hsa-miR-1257;hsa-miR-26a-1-3p;NC_000008.11_20037*;NC_000003.12_7973;NC_000011.10_25091;hsa-miR-515-5p;NC_000012.12_26414;NC_000018.10_33037;hsa-miR-548d-3p;hsa-miR-302b-3p;hsa-miR-20a-5p;NC_000009.12_21925;hsa-miR-3143;hsa-miR-582-5p;hsa-miR-520c-3p;hsa-miR-373-5p;hsa-miR-522-3p;NC_…
VTI1A	NONHSAT205276	0.779661	1.14199e-44	33	hsa-miR-25-5p;hsa-miR-372-5p;NC_000013.11_28441;NC_000023.11_36905;hsa-miR-92a-1-5p;hsa-miR-7974;hsa-miR-518e-5p>hsa-miR-519a-5p>hsa-miR-519b-5p>hsa-miR-519c-5p>hsa-miR-522-5p>hsa-miR-523-5p;hsa-miR-3662;hsa-miR-510-5p;NC_000007.14_17821;NC_000021.9_35751;hsa-miR-302a-5p;NC_000011.10_25384;NC_000012.12_26286;NC_000006.12_15769;hsa-miR-34c-5p;NC_000005.10_14158;hsa-miR-1257;NC_000002.12_3238;NC_00…
PPARA	lnc-ITGA1-1:1	0.803571	1.16394e-44	31	NC_000013.11_28441;hsa-miR-30c-1-3p;NC_000005.10_12140;NC_000008.11_19445;NC_000023.11_36905;NC_000003.12_8135;hsa-miR-92a-1-5p;hsa-miR-7974;hsa-miR-629-3p;hsa-miR-3662;hsa-miR-27b-5p;NC_000021.9_35751;NC_000012.12_25887;NC_000004.12_10500;NC_000011.10_25384;NC_000005.10_11919>NC_000005.10_11920;NC_000012.12_26286;NC_000006.12_15769;hsa-miR-34c-5p;NC_000022.11_36437;hsa-miR-1257;NC_000001.11_3101…
MEF2A	lnc-POTED-16:1	0.698413	1.16394e-44	31	hsa-miR-372-5p;NC_000013.11_28441;NC_000008.11_19445;hsa-miR-92a-1-5p;hsa-miR-3662;NC_000007.14_17821;NC_000012.12_25887;NC_000011.10_25384;NC_000004.12_9892;NC_000006.12_15769;hsa-miR-17-5p;hsa-miR-1257;hsa-miR-7-5p;NC_000012.12_25503;NC_000011.10_25091;hsa-miR-519a-3p;hsa-miR-302b-5p;hsa-miR-3529-3p;hsa-miR-515-5p;NC_000003.12_7520;NC_000020.11_35116;NC_000018.10_33037;hsa-miR-548d-3p;hsa-miR-3…
RAP2A	ENST00000281092	0.205	1.18227e-44	33	hsa-miR-33b-3p;hsa-miR-372-5p;NC_000008.11_19445;NC_000010.11_23303;hsa-miR-629-3p;NC_000021.9_35751;NC_000012.12_25887;NC_000005.10_11919>NC_000005.10_11920;hsa-miR-302c-5p;NC_000006.12_15769;hsa-miR-17-5p;hsa-miR-34c-5p;NC_000013.11_27627;NC_000022.11_36372;hsa-miR-26a-1-3p;hsa-miR-7-5p;NC_000012.12_25503;NC_000011.10_25091;hsa-miR-15b-3p;hsa-miR-3529-3p;NC_000003.12_7520;hsa-miR-517a-3p>hsa-mi…
TTBK2	NONHSAT224112	0.586667	1.21243e-44	34	hsa-miR-372-5p;hsa-miR-3155a;NC_000008.11_19445;NC_000010.11_23303;hsa-miR-92a-1-5p;hsa-miR-3662;NC_000007.14_17821;NC_000003.12_8583;NC_000012.12_25887;hsa-miR-18a-3p;NC_000006.12_15769;hsa-miR-26a-1-3p;NC_000022.11_36437;hsa-miR-7-5p;NC_000003.12_9133;hsa-miR-520a-3p;hsa-miR-512-3p;hsa-miR-345-5p;hsa-miR-92a-3p;NC_000020.11_35116;NC_000007.14_16719;NC_000009.12_21957;NC_000018.10_33037;hsa-miR-…
AHNAK2	NONHSAT224112	0.52	1.32649e-44	33	hsa-miR-371a-5p;hsa-miR-372-5p;hsa-miR-3155a;NC_000010.11_23303;hsa-miR-92a-1-5p;hsa-miR-3662;NC_000007.14_17821;NC_000012.12_25887;hsa-miR-18a-3p;NC_000004.12_10500;NC_000006.12_15769;NC_000013.11_27627;NC_000022.11_36372;NC_000022.11_36437;hsa-miR-7-5p;NC_000003.12_9133;hsa-miR-512-3p;hsa-miR-345-5p;hsa-miR-5585-3p;hsa-miR-92a-3p;NC_000020.11_35116;NC_000018.10_33037;NT_187601.1_39493>NC_000014…
CPEB4	NONHSAT224112	0.6	1.32649e-44	33	hsa-miR-372-5p;hsa-miR-3155a;NC_000008.11_19445;hsa-miR-498;NC_000010.11_23303;hsa-miR-92a-1-5p;hsa-miR-629-3p;hsa-miR-3662;NC_000007.14_17821;NC_000012.12_25887;NC_000006.12_15769;NC_000013.11_27627;hsa-miR-26a-1-3p;NC_000003.12_9133;hsa-miR-512-3p;hsa-miR-345-5p;NC_000020.11_35116;NC_000007.14_16719;NC_000016.10_31157;NC_000018.10_33037;hsa-miR-302b-3p;hsa-miR-3143;NC_000007.14_17077;NC_000009.…
ANK2	NONHSAT165427	0.776119	1.39231e-44	35	hsa-miR-372-5p;hsa-miR-3155a;NC_000013.11_28441;NC_000005.10_12140;NC_000023.11_36905;hsa-miR-371b-3p;hsa-miR-7974;hsa-miR-518e-5p>hsa-miR-519a-5p>hsa-miR-519b-5p>hsa-miR-519c-5p>hsa-miR-522-5p>hsa-miR-523-5p;hsa-miR-3662;hsa-miR-1298-5p;NC_000010.11_23646;NC_000012.12_25887;NC_000011.10_25384;NC_000006.12_15769;hsa-miR-34c-5p;NC_000022.11_36437;NC_000005.10_14158;hsa-miR-26a-1-3p;NC_000002.12_32…
PDLIM5	ENST00000563635	0.540541	1.41116e-44	32	NC_000006.12_14671;hsa-miR-372-5p;hsa-miR-3155a;NC_000008.11_19445;hsa-miR-518e-5p>hsa-miR-519a-5p>hsa-miR-519b-5p>hsa-miR-519c-5p>hsa-miR-522-5p>hsa-miR-523-5p;hsa-miR-3662;NC_000007.14_17821;hsa-miR-302a-5p;NC_000021.9_35751;NC_000003.12_8583;NC_000012.12_25887;NC_000011.10_25384;hsa-miR-302c-5p;NC_000006.12_15769;hsa-miR-17-5p;NC_000022.11_36372;hsa-miR-26a-1-3p;NC_000001.11_3101;hsa-miR-519a-…
MAP3K5	ENST00000263967	0.260274	1.41116e-44	32	hsa-miR-33b-3p;NC_000013.11_28441;hsa-miR-92a-1-5p;hsa-miR-629-3p;NC_000011.10_25384;NC_000018.10_33742;NC_000005.10_11919>NC_000005.10_11920;NC_000009.12_21255;hsa-miR-17-5p;NC_000013.11_27627;hsa-miR-1257;NC_000022.11_36437;hsa-miR-7-5p;NC_000002.12_3238;NC_000011.10_25091;NC_000015.10_30316;hsa-miR-15b-3p;NC_000003.12_7520;hsa-let-7c-5p;NC_000012.12_26721;hsa-miR-296-3p;NT_187601.1_39493>NC_00…
SLC16A4	NR_033268	0.348624	1.43963e-44	33	NC_000009.12_21574;hsa-miR-3155a;NC_000013.11_28441;hsa-miR-30c-1-3p;NC_000010.11_23303;NC_000007.14_17821;hsa-miR-510-5p;hsa-miR-302a-5p;NC_000012.12_25887;NC_000004.12_9958;hsa-miR-302c-5p;NC_000006.12_15769;hsa-miR-17-5p;NC_000022.11_36372;hsa-miR-7-5p;NC_000003.12_9133;hsa-miR-520a-3p;NC_000023.11_38289;hsa-miR-512-3p;NC_000003.12_7520;NC_000009.12_21957;NC_000012.12_26414;hsa-let-7c-5p;hsa-m…
SEL1L3	NR_033268	0.33945	1.43963e-44	33	hsa-miR-934;hsa-miR-371a-5p;hsa-miR-372-5p;hsa-miR-3155a;hsa-miR-30c-1-3p;NC_000023.11_36905;NC_000010.11_23303;NC_000003.12_7276;NC_000007.14_17821;hsa-miR-510-5p;NC_000010.11_23646;NC_000003.12_8583;NC_000012.12_25887;hsa-miR-18a-3p;hsa-miR-302c-5p;NC_000006.12_15769;hsa-miR-26a-1-3p;hsa-miR-7-5p;NC_000001.11_3101;NC_000002.12_3238;NC_000003.12_9133;hsa-miR-302b-5p;NC_000020.11_35116;NC_000003.…
ADAM20	NR_038921	0.59	1.44913e-44	36	hsa-miR-372-5p;NC_000013.11_28441;hsa-miR-30c-1-3p;hsa-miR-371b-3p;hsa-miR-7974;hsa-miR-518e-5p>hsa-miR-519a-5p>hsa-miR-519b-5p>hsa-miR-519c-5p>hsa-miR-522-5p>hsa-miR-523-5p;hsa-miR-3662;NC_000007.14_17821;NC_000021.9_35751;NC_000012.12_25887;NC_000011.10_25384;NC_000005.10_11919>NC_000005.10_11920;NC_000009.12_21255;hsa-miR-302c-5p;NC_000012.12_26286;NC_000006.12_15769;NC_000006.12_15809;NC_0000…
CPEB2	NONHSAT219565	0.679245	1.50408e-44	32	hsa-miR-934;NC_000006.12_14671;NC_000013.11_28441;NC_000008.11_19445;NC_000023.11_36905;hsa-miR-498;hsa-miR-3662;hsa-miR-302a-5p;NC_000003.12_8583;NC_000011.10_25384;NC_000009.12_21255;hsa-miR-17-5p;hsa-miR-34c-5p;NC_000022.11_36372;NC_000002.12_3238;NC_000003.12_9133;NC_000003.12_7973;NC_000018.10_33480;NC_000012.12_25503;NC_000011.10_25091;hsa-miR-519a-3p;NC_000003.12_7520;NC_000018.10_33504*;N…
TBC1D19	NR_033268	0.385321	1.52242e-44	34	hsa-miR-934;hsa-miR-372-5p;hsa-miR-30c-1-3p;hsa-miR-92a-1-5p;hsa-miR-629-3p;hsa-miR-1298-5p;hsa-miR-510-5p;hsa-miR-302a-5p;NC_000021.9_35751;NC_000012.12_25887;hsa-miR-18a-3p;NC_000003.12_8583;NC_000012.12_26286;NC_000006.12_15769;NC_000022.11_36372;NC_000005.10_14158;hsa-miR-7-5p;NC_000003.12_9133;NC_000011.10_25091;NC_000023.11_38289;hsa-miR-345-5p;NC_000020.11_35116;NC_000007.14_16719;NC_00001…
ZEB1	NR_033268	0.412844	1.52242e-44	34	hsa-miR-372-5p;NC_000013.11_28441;hsa-miR-30c-1-3p;NC_000023.11_36905;hsa-miR-92a-1-5p;hsa-miR-518e-5p>hsa-miR-519a-5p>hsa-miR-519b-5p>hsa-miR-519c-5p>hsa-miR-522-5p>hsa-miR-523-5p;hsa-miR-629-3p;NC_000003.12_7276;hsa-miR-1298-5p;NC_000021.9_35751;NC_000012.12_25887;hsa-miR-18a-3p;hsa-miR-302c-5p;NC_000012.12_26286;NC_000006.12_15769;hsa-miR-26a-1-3p;hsa-miR-7-5p;NC_000001.11_3101;NC_000002.12_32…
NAMPT	ENST00000281092	0.235	1.72801e-44	34	hsa-miR-33b-3p;NC_000006.12_14671;hsa-miR-372-5p;hsa-miR-30c-1-3p;hsa-miR-92a-1-5p;hsa-miR-1298-5p;NC_000012.12_25887;NC_000011.10_25384;NC_000005.10_11919>NC_000005.10_11920;hsa-miR-302c-5p;hsa-miR-17-5p;hsa-miR-34c-5p;NC_000006.12_15809;NC_000013.11_27627;hsa-miR-26a-1-3p;hsa-miR-1257;hsa-miR-7-5p;NC_000003.12_7973;NC_000012.12_25503;NC_000011.10_25091;hsa-miR-15b-3p;hsa-miR-3529-3p;NC_000003.1…
PIK3CA	ENST00000568777	0.488636	1.76658e-44	34	hsa-miR-934;hsa-miR-33b-3p;hsa-miR-372-5p;NC_000013.11_28441;hsa-miR-30c-1-3p;hsa-miR-371b-3p;hsa-miR-92a-1-5p;hsa-miR-518e-5p>hsa-miR-519a-5p>hsa-miR-519b-5p>hsa-miR-519c-5p>hsa-miR-522-5p>hsa-miR-523-5p;hsa-miR-629-3p;NC_000010.11_23646;NC_000003.12_8583;NC_000012.12_25887;NC_000018.10_33742;hsa-miR-302c-5p;NC_000006.12_15769;hsa-miR-26a-1-3p;hsa-miR-7-5p;NC_000002.12_3238;NC_000011.10_25091;hs…
SLC38A1	NONHSAT123764	0.661765	1.81036e-44	31	hsa-miR-934;NC_000006.12_14671;hsa-miR-372-5p;NC_000013.11_28441;hsa-miR-30c-1-3p;NC_000005.10_12140;hsa-miR-371b-3p;hsa-miR-7974;NC_000003.12_7276;NC_000004.12_10500;NC_000011.10_25384;NC_000009.12_21255;hsa-miR-302c-5p;hsa-miR-17-5p;NC_000013.11_27627;NC_000022.11_36372;hsa-miR-1257;NC_000002.12_3238;NC_000003.12_7973;hsa-miR-519a-3p;NC_000015.10_30316;hsa-miR-15b-3p;hsa-miR-512-3p;NC_000018.10…
UBR3	ENST00000568777	0.454545	1.86323e-44	31	NC_000001.11_2008;hsa-miR-934;hsa-miR-33b-3p;hsa-miR-372-5p;NC_000013.11_28441;hsa-miR-30c-1-3p;NC_000005.10_12588;hsa-miR-92a-1-5p;hsa-miR-629-3p;NC_000012.12_25887;NC_000018.10_33742;NC_000004.12_9892;hsa-miR-302c-5p;NC_000006.12_15769;NC_000002.12_3238;NC_000003.12_7973;NC_000012.12_25503;NC_000011.10_25091;hsa-miR-515-5p;NC_000020.11_35116;NC_000012.12_26414;hsa-miR-296-3p;hsa-miR-3143;NC_000…
DENND4A	ENST00000432045	0.6	1.95913e-44	31	NC_000006.12_14671;hsa-miR-30c-1-3p;NC_000008.11_19445;hsa-miR-629-3p;NC_000012.12_25887;NC_000011.10_25384;NC_000004.12_9892;NC_000009.12_21255;NC_000006.12_15769;hsa-miR-17-5p;hsa-miR-34c-5p;hsa-miR-26a-1-3p;hsa-miR-1257;hsa-miR-7-5p;NC_000011.10_25091;hsa-miR-515-5p;NC_000003.12_7520;NC_000020.11_35116;hsa-miR-548d-3p;NT_187601.1_39493>NC_000014.9_29213;hsa-miR-20a-5p;hsa-miR-302b-3p;hsa-miR-3…
DENND4A	NR_034072	0.68254	1.95913e-44	31	hsa-miR-934;hsa-miR-1323;NC_000013.11_28441;hsa-miR-30c-1-3p;hsa-miR-371b-3p;hsa-miR-3662;NC_000012.12_25887;NC_000011.10_25384;NC_000006.12_15769;hsa-miR-17-5p;NC_000013.11_27627;hsa-miR-26a-1-3p;hsa-miR-7-5p;NC_000002.12_3238;NC_000012.12_25503;NC_000011.10_25091;hsa-miR-345-5p;hsa-miR-3529-3p;hsa-miR-515-5p;NC_000003.12_7520;NC_000012.12_26414;hsa-miR-526b-5p;NT_187601.1_39493>NC_000014.9_2921…
[truncated: 146,363 more rows]
